# Supplementary material
Source: publisher figshare collection journal article supplement (https://acs.figshare.com/ndownloader/files/3938266)
Supplement: Supplementary file 1 [file 3938266]

 
data_CyclophenylAu_201215_0m
 
_audit_creation_method            SHELXL-2013
_chemical_name_systematic
;
 ?
;
_chemical_name_common             ?
_chemical_melting_point           ?
_chemical_formula_moiety          'C24 H33 N O Si'
_chemical_formula_sum
 'C24 H33 N O Si' 
_chemical_formula_weight          379.60

loop_
 _atom_type_symbol
 _atom_type_description
 _atom_type_scat_dispersion_real
 _atom_type_scat_dispersion_imag
 _atom_type_scat_source
 'C'  'C'   0.0033   0.0016
 'International Tables Vol C Tables 4.2.6.8 and 6.1.1.4'
 'H'  'H'   0.0000   0.0000
 'International Tables Vol C Tables 4.2.6.8 and 6.1.1.4'
 'N'  'N'   0.0061   0.0033
 'International Tables Vol C Tables 4.2.6.8 and 6.1.1.4'
 'O'  'O'   0.0106   0.0060
 'International Tables Vol C Tables 4.2.6.8 and 6.1.1.4'
 'Si'  'Si'   0.0817   0.0704
 'International Tables Vol C Tables 4.2.6.8 and 6.1.1.4'
 
_space_group_crystal_system       monoclinic
_space_group_IT_number            14
_space_group_name_H-M_alt         'P 21/c'
_space_group_name_Hall            '-P 2ybc'
 
_shelx_space_group_comment
;
The symmetry employed for this shelxl refinement is uniquely defined
by the following loop, which should always be used as a source of
symmetry information in preference to the above space-group names.
They are only intended as comments.
;
 
loop_
 _space_group_symop_operation_xyz
 'x, y, z'
 '-x, y+1/2, -z+1/2'
 '-x, -y, -z'
 'x, -y-1/2, z-1/2'
 
_cell_length_a                    7.1879(12)
_cell_length_b                    34.402(6)
_cell_length_c                    17.855(3)
_cell_angle_alpha                 90
_cell_angle_beta                  91.042(3)
_cell_angle_gamma                 90
_cell_volume                      4414.5(13)
_cell_formula_units_Z             8
_cell_measurement_temperature     150(2)
_cell_measurement_reflns_used     9215
_cell_measurement_theta_min        2.28
_cell_measurement_theta_max       26.63
 
_exptl_crystal_description        'PLATE' 
_exptl_crystal_colour             'COLOURLESS' 
_exptl_crystal_density_meas       ? 
_exptl_crystal_density_method     ?              
_exptl_crystal_density_diffrn     1.142          
_exptl_crystal_F_000              1648
_exptl_transmission_factor_min    ?                                             
_exptl_transmission_factor_max    ?                                             
_exptl_crystal_size_max           0.400
_exptl_crystal_size_mid           0.360
_exptl_crystal_size_min           0.310
_exptl_absorpt_coefficient_mu     0.119
_shelx_estimated_absorpt_T_min    0.954
_shelx_estimated_absorpt_T_max    0.964
_exptl_absorpt_correction_type    'MULTI-SCAN'
_exptl_absorpt_correction_T_min   0.954 
_exptl_absorpt_correction_T_max   0.964 
_exptl_absorpt_process_details    'SADABS,(BRUKER,2006)' 
 
_exptl_special_details
;
 ?
;
 
_diffrn_ambient_temperature       150(2)
_diffrn_radiation_wavelength      0.71073
_diffrn_radiation_type            MoK\a
_diffrn_source                    ?                       
_diffrn_measurement_device_type   'Bruker APEX-II CCD'
_diffrn_measurement_method       '\f and \w scans'
_diffrn_detector_area_resol_mean  ? 
_diffrn_reflns_number             45362
_diffrn_reflns_av_unetI/netI      0.0443
_diffrn_reflns_av_R_equivalents   0.0667
_diffrn_reflns_limit_h_min        -8
_diffrn_reflns_limit_h_max        8
_diffrn_reflns_limit_k_min        -40
_diffrn_reflns_limit_k_max        40
_diffrn_reflns_limit_l_min        -21
_diffrn_reflns_limit_l_max        21
_diffrn_reflns_theta_min          2.111
_diffrn_reflns_theta_max          24.998
_diffrn_reflns_theta_full         25.242
_diffrn_measured_fraction_theta_max   0.999
_diffrn_measured_fraction_theta_full  0.972
_diffrn_reflns_Laue_measured_fraction_max    0.999
_diffrn_reflns_Laue_measured_fraction_full   0.972
_diffrn_reflns_point_group_measured_fraction_max   0.999
_diffrn_reflns_point_group_measured_fraction_full  0.972
_reflns_number_total              7780
_reflns_number_gt                 5844
_reflns_threshold_expression      'I > 2\s(I)'
_reflns_Friedel_coverage          0.000
_reflns_Friedel_fraction_max      .
_reflns_Friedel_fraction_full     .
 
_reflns_special_details
;
 Reflections were merged by SHELXL according to the crystal
 class for the calculation of statistics and refinement.
 
 _reflns_Friedel_fraction is defined as the number of unique
 Friedel pairs measured divided by the number that would be
 possible theoretically, ignoring centric projections and
 systematic absences.
;
 
_computing_data_collection        'Bruker APEX2'
_computing_cell_refinement        'Bruker SAINT'
_computing_data_reduction         'Bruker SAINT'  
_computing_structure_solution     'SHELXL-2013 (Sheldrick, 2013)'
_computing_structure_refinement   'SHELXL-2013 (Sheldrick, 2013)'
_computing_molecular_graphics     'Bruker SHELXTL'
_computing_publication_material   'Bruker SHELXTL'
 
_refine_special_details
;
 ?
;
_refine_ls_structure_factor_coef  Fsqd
_refine_ls_matrix_type            full
_refine_ls_weighting_scheme       calc
_refine_ls_weighting_details
'w=1/[\s^2^(Fo^2^)+(0.1292P)^2^+4.4069P] where P=(Fo^2^+2Fc^2^)/3'
_atom_sites_solution_primary      ?
_atom_sites_solution_secondary    ?
_atom_sites_solution_hydrogens    geom
_refine_ls_hydrogen_treatment     constr
_refine_ls_extinction_method      none
_refine_ls_extinction_coef        .
_refine_ls_number_reflns          7780
_refine_ls_number_parameters      675
_refine_ls_number_restraints      445
_refine_ls_R_factor_all           0.0977
_refine_ls_R_factor_gt            0.0746
_refine_ls_wR_factor_ref          0.2429
_refine_ls_wR_factor_gt           0.2182
_refine_ls_goodness_of_fit_ref    1.058
_refine_ls_restrained_S_all       1.054
_refine_ls_shift/su_max           0.000
_refine_ls_shift/su_mean          0.000
 
loop_
 _atom_site_label
 _atom_site_type_symbol
 _atom_site_fract_x
 _atom_site_fract_y
 _atom_site_fract_z
 _atom_site_U_iso_or_equiv
 _atom_site_adp_type
 _atom_site_occupancy
 _atom_site_site_symmetry_order  
 _atom_site_calc_flag
 _atom_site_refinement_flags_posn
 _atom_site_refinement_flags_adp
 _atom_site_refinement_flags_occupancy
 _atom_site_disorder_assembly
 _atom_site_disorder_group
Si1 Si 0.85654(15) 0.09329(3) 0.56603(6) 0.0503(3) Uani 1 1 d D . . . .
Si2 Si 0.34710(14) 0.08576(3) 0.15446(5) 0.0402(3) Uani 1 1 d D . . . .
O1 O 0.7568(4) 0.23319(9) 0.95743(15) 0.0651(8) Uani 1 1 d . . . . .
O2 O 0.2712(4) 0.23015(7) -0.23363(14) 0.0551(7) Uani 1 1 d . . . . .
N1 N 0.7511(4) 0.22859(8) 0.83027(16) 0.0412(6) Uani 1 1 d . . . . .
N2 N 0.2558(4) 0.22398(7) -0.10689(15) 0.0372(6) Uani 1 1 d . . . . .
C1 C 0.6892(6) 0.26929(10) 0.8265(2) 0.0556(9) Uani 1 1 d . . . . .
H1A H 0.7944 0.2860 0.8136 0.083 Uiso 1 1 calc R U . . .
H1B H 0.6412 0.2771 0.8753 0.083 Uiso 1 1 calc R U . . .
H1C H 0.5906 0.2719 0.7882 0.083 Uiso 1 1 calc R U . . .
C2 C 0.7740(5) 0.21267(11) 0.90143(19) 0.0463(8) Uani 1 1 d . . . . .
C3 C 0.8189(4) 0.17136(10) 0.90481(18) 0.0431(8) Uani 1 1 d . . . . .
C4 C 0.8352(5) 0.15328(13) 0.9755(2) 0.0557(10) Uani 1 1 d . . . . .
H4 H 0.8196 0.1680 1.0200 0.067 Uiso 1 1 calc R U . . .
C5 C 0.8736(6) 0.11441(13) 0.9795(2) 0.0641(12) Uani 1 1 d . . . . .
H5 H 0.8825 0.1021 1.0270 0.077 Uiso 1 1 calc R U . . .
C6 C 0.8994(6) 0.09298(12) 0.9156(2) 0.0597(11) Uani 1 1 d . . . . .
H6 H 0.9276 0.0661 0.9194 0.072 Uiso 1 1 calc R U . . .
C7 C 0.8850(5) 0.11009(10) 0.8461(2) 0.0484(9) Uani 1 1 d . . . . .
H7 H 0.9032 0.0950 0.8023 0.058 Uiso 1 1 calc R U . . .
C8 C 0.8433(4) 0.14981(10) 0.83978(17) 0.0383(7) Uani 1 1 d . . . . .
C9 C 0.8236(4) 0.16921(9) 0.76810(17) 0.0359(7) Uani 1 1 d . . . . .
C10 C 0.7795(4) 0.20783(9) 0.76482(17) 0.0371(7) Uani 1 1 d . . . . .
C11 C 0.7534(5) 0.22936(9) 0.69322(19) 0.0425(8) Uani 1 1 d . . . . .
H11 H 0.6208 0.2332 0.6771 0.051 Uiso 1 1 calc R U . . .
C12 C 0.8831(6) 0.26229(11) 0.6731(2) 0.0554(10) Uani 1 1 d . . . . .
H12A H 0.8285 0.2853 0.6477 0.066 Uiso 1 1 calc R U . . .
H12B H 0.9886 0.2679 0.7078 0.066 Uiso 1 1 calc R U . . .
C13 C 0.8870(5) 0.22502(11) 0.6306(2) 0.0528(9) Uani 1 1 d . . . . .
H13A H 0.9954 0.2077 0.6388 0.063 Uiso 1 1 calc R U . . .
H13B H 0.8354 0.2251 0.5788 0.063 Uiso 1 1 calc R U . . .
C14 C 0.8398(5) 0.14610(10) 0.70093(19) 0.0418(8) Uani 1 1 d . . . . .
C15 C 0.8499(5) 0.12494(10) 0.64778(19) 0.0474(8) Uani 1 1 d . . . . .
C16 C 1.0723(11) 0.1074(2) 0.5132(4) 0.0529(19) Uani 0.5 1 d D U P A 1
H16 H 1.1786 0.1055 0.5500 0.063 Uiso 0.5 1 calc R U P A 1
C17 C 1.082(3) 0.1480(5) 0.4793(16) 0.110(6) Uani 0.5 1 d D U P A 1
H17A H 1.2110 0.1536 0.4654 0.164 Uiso 0.5 1 calc R U P A 1
H17B H 1.0413 0.1672 0.5160 0.164 Uiso 0.5 1 calc R U P A 1
H17C H 1.0016 0.1492 0.4345 0.164 Uiso 0.5 1 calc R U P A 1
C18 C 1.1147(19) 0.0784(3) 0.4500(6) 0.085(3) Uani 0.5 1 d D U P A 1
H18A H 1.0129 0.0788 0.4128 0.127 Uiso 0.5 1 calc R U P A 1
H18B H 1.1271 0.0522 0.4709 0.127 Uiso 0.5 1 calc R U P A 1
H18C H 1.2311 0.0859 0.4261 0.127 Uiso 0.5 1 calc R U P A 1
C16' C 1.0845(16) 0.0651(3) 0.5694(6) 0.094(3) Uani 0.5 1 d D U P A 2
H16' H 1.1812 0.0857 0.5766 0.113 Uiso 0.5 1 calc R U P A 2
C17' C 1.135(2) 0.0461(5) 0.4945(8) 0.153(6) Uani 0.5 1 d D U P A 2
H17D H 1.2460 0.0298 0.5018 0.229 Uiso 0.5 1 calc R U P A 2
H17E H 1.1616 0.0664 0.4577 0.229 Uiso 0.5 1 calc R U P A 2
H17F H 1.0313 0.0301 0.4764 0.229 Uiso 0.5 1 calc R U P A 2
C18' C 1.104(2) 0.0403(7) 0.6400(12) 0.096(5) Uani 0.5 1 d D U P A 2
H18D H 1.0124 0.0191 0.6380 0.144 Uiso 0.5 1 calc R U P A 2
H18E H 1.0820 0.0564 0.6841 0.144 Uiso 0.5 1 calc R U P A 2
H18F H 1.2295 0.0293 0.6431 0.144 Uiso 0.5 1 calc R U P A 2
C25 C 0.1939(5) 0.26459(9) -0.1038(2) 0.0490(9) Uani 1 1 d . . . . .
H25A H 0.2994 0.2813 -0.0898 0.074 Uiso 1 1 calc R U . . .
H25B H 0.0963 0.2672 -0.0665 0.074 Uiso 1 1 calc R U . . .
H25C H 0.1447 0.2724 -0.1531 0.074 Uiso 1 1 calc R U . . .
C19 C 0.8690(9) 0.04381(18) 0.5982(4) 0.0467(16) Uani 0.5 1 d D U P A 1
H19 H 0.8637 0.0266 0.5531 0.056 Uiso 0.5 1 calc R U P A 1
C20 C 1.0447(19) 0.0337(7) 0.6424(11) 0.073(4) Uani 0.5 1 d D U P A 1
H20A H 1.0366 0.0443 0.6932 0.110 Uiso 0.5 1 calc R U P A 1
H20B H 1.1528 0.0449 0.6176 0.110 Uiso 0.5 1 calc R U P A 1
H20C H 1.0581 0.0054 0.6450 0.110 Uiso 0.5 1 calc R U P A 1
C21 C 0.705(2) 0.0334(6) 0.6467(11) 0.087(6) Uani 0.5 1 d D U P A 1
H21A H 0.7181 0.0065 0.6639 0.130 Uiso 0.5 1 calc R U P A 1
H21B H 0.5895 0.0363 0.6175 0.130 Uiso 0.5 1 calc R U P A 1
H21C H 0.7031 0.0508 0.6902 0.130 Uiso 0.5 1 calc R U P A 1
C19' C 0.6504(15) 0.0559(2) 0.5665(5) 0.075(2) Uani 0.5 1 d D U P A 2
H19' H 0.5344 0.0719 0.5668 0.090 Uiso 0.5 1 calc R U P A 2
C20' C 0.6303(19) 0.0292(3) 0.4972(6) 0.104(4) Uani 0.5 1 d D U P A 2
H20D H 0.7357 0.0111 0.4960 0.155 Uiso 0.5 1 calc R U P A 2
H20E H 0.6287 0.0451 0.4516 0.155 Uiso 0.5 1 calc R U P A 2
H20F H 0.5140 0.0145 0.5000 0.155 Uiso 0.5 1 calc R U P A 2
C21' C 0.644(2) 0.0309(6) 0.6368(8) 0.072(4) Uani 0.5 1 d D U P A 2
H21D H 0.5214 0.0185 0.6398 0.108 Uiso 0.5 1 calc R U P A 2
H21E H 0.6650 0.0473 0.6810 0.108 Uiso 0.5 1 calc R U P A 2
H21F H 0.7405 0.0109 0.6348 0.108 Uiso 0.5 1 calc R U P A 2
C26 C 0.2845(4) 0.20901(9) -0.17813(17) 0.0387(7) Uani 1 1 d . . . . .
C22 C 0.6332(11) 0.1044(2) 0.5139(5) 0.061(2) Uani 0.5 1 d D U P A 1
H22 H 0.5359 0.0918 0.5449 0.073 Uiso 0.5 1 calc R U P A 1
C23 C 0.572(2) 0.1476(4) 0.5105(12) 0.112(7) Uani 0.5 1 d D U P A 1
H23A H 0.6680 0.1631 0.4861 0.168 Uiso 0.5 1 calc R U P A 1
H23B H 0.5535 0.1574 0.5614 0.168 Uiso 0.5 1 calc R U P A 1
H23C H 0.4548 0.1497 0.4817 0.168 Uiso 0.5 1 calc R U P A 1
C24 C 0.6224(15) 0.0823(3) 0.4400(5) 0.094(3) Uani 0.5 1 d D U P A 1
H24A H 0.4987 0.0858 0.4171 0.140 Uiso 0.5 1 calc R U P A 1
H24B H 0.6447 0.0546 0.4493 0.140 Uiso 0.5 1 calc R U P A 1
H24C H 0.7170 0.0923 0.4062 0.140 Uiso 0.5 1 calc R U P A 1
C22' C 0.8294(17) 0.1202(3) 0.4770(6) 0.097(3) Uani 0.5 1 d D U P A 2
H22' H 0.8242 0.1014 0.4344 0.116 Uiso 0.5 1 calc R U P A 2
C23' C 1.004(2) 0.1469(5) 0.4690(11) 0.099(5) Uani 0.5 1 d D U P A 2
H23D H 1.0125 0.1559 0.4171 0.148 Uiso 0.5 1 calc R U P A 2
H23E H 1.1165 0.1322 0.4826 0.148 Uiso 0.5 1 calc R U P A 2
H23F H 0.9933 0.1694 0.5024 0.148 Uiso 0.5 1 calc R U P A 2
C24' C 0.649(2) 0.1440(4) 0.4775(10) 0.104(5) Uani 0.5 1 d D U P A 2
H24D H 0.6550 0.1631 0.5183 0.156 Uiso 0.5 1 calc R U P A 2
H24E H 0.5430 0.1266 0.4851 0.156 Uiso 0.5 1 calc R U P A 2
H24F H 0.6329 0.1576 0.4296 0.156 Uiso 0.5 1 calc R U P A 2
C27 C 0.3281(4) 0.16769(9) -0.18202(17) 0.0360(7) Uani 1 1 d . . . . .
C28 C 0.3476(5) 0.15032(11) -0.25256(18) 0.0463(8) Uani 1 1 d . . . . .
H28 H 0.3359 0.1657 -0.2966 0.056 Uiso 1 1 calc R U . . .
C29 C 0.3833(5) 0.11152(12) -0.2581(2) 0.0546(9) Uani 1 1 d . . . . .
H29 H 0.3932 0.0997 -0.3059 0.066 Uiso 1 1 calc R U . . .
C30 C 0.4052(5) 0.08932(10) -0.1939(2) 0.0513(9) Uani 1 1 d . . . . .
H30 H 0.4328 0.0624 -0.1980 0.062 Uiso 1 1 calc R U . . .
C31 C 0.3875(5) 0.10568(9) -0.12434(19) 0.0407(7) Uani 1 1 d . . . . .
H31 H 0.4023 0.0900 -0.0809 0.049 Uiso 1 1 calc R U . . .
C32 C 0.3478(4) 0.14534(9) -0.11692(16) 0.0321(6) Uani 1 1 d . . . . .
C33 C 0.3246(4) 0.16394(8) -0.04485(16) 0.0314(6) Uani 1 1 d . . . . .
C34 C 0.2810(4) 0.20251(9) -0.04135(16) 0.0322(6) Uani 1 1 d . . . . .
C35 C 0.2490(5) 0.22333(9) 0.02992(18) 0.0396(7) Uani 1 1 d . . . . .
H35 H 0.1153 0.2270 0.0427 0.047 Uiso 1 1 calc R U . . .
C36 C 0.3771(5) 0.25628(10) 0.0542(2) 0.0506(9) Uani 1 1 d . . . . .
H36A H 0.4846 0.2622 0.0223 0.061 Uiso 1 1 calc R U . . .
H36B H 0.3205 0.2791 0.0787 0.061 Uiso 1 1 calc R U . . .
C37 C 0.3792(5) 0.21871(10) 0.0960(2) 0.0490(9) Uani 1 1 d . . . . .
H37A H 0.3245 0.2184 0.1465 0.059 Uiso 1 1 calc R U . . .
H37B H 0.4886 0.2015 0.0901 0.059 Uiso 1 1 calc R U . . .
C40 C 0.1421(8) 0.04977(16) 0.1367(3) 0.0346(14) Uani 0.5 1 d D U P B 1
H40 H 0.0267 0.0660 0.1374 0.042 Uiso 0.5 1 calc R U P B 1
C41 C 0.1380(16) 0.0292(4) 0.0612(7) 0.060(3) Uani 0.5 1 d D U P B 1
H41A H 0.2230 0.0069 0.0630 0.090 Uiso 0.5 1 calc R U P B 1
H41B H 0.1771 0.0473 0.0222 0.090 Uiso 0.5 1 calc R U P B 1
H41C H 0.0114 0.0201 0.0499 0.090 Uiso 0.5 1 calc R U P B 1
C42 C 0.1195(13) 0.0198(2) 0.1986(5) 0.074(3) Uani 0.5 1 d D U P B 1
H42A H -0.0046 0.0080 0.1945 0.111 Uiso 0.5 1 calc R U P B 1
H42B H 0.1342 0.0325 0.2475 0.111 Uiso 0.5 1 calc R U P B 1
H42C H 0.2142 -0.0005 0.1936 0.111 Uiso 0.5 1 calc R U P B 1
C40' C 0.3765(13) 0.0362(3) 0.1245(5) 0.078(2) Uani 0.5 1 d D U P B 2
H40' H 0.3719 0.0191 0.1698 0.093 Uiso 0.5 1 calc R U P B 2
C41' C 0.2120(19) 0.0251(5) 0.0720(10) 0.095(5) Uani 0.5 1 d D U P B 2
H41D H 0.2245 0.0386 0.0240 0.143 Uiso 0.5 1 calc R U P B 2
H41E H 0.0948 0.0327 0.0950 0.143 Uiso 0.5 1 calc R U P B 2
H41F H 0.2122 -0.0031 0.0636 0.143 Uiso 0.5 1 calc R U P B 2
C42' C 0.5656(18) 0.0293(6) 0.0861(12) 0.078(4) Uani 0.5 1 d D U P B 2
H42D H 0.5792 0.0016 0.0745 0.116 Uiso 0.5 1 calc R U P B 2
H42E H 0.6673 0.0375 0.1198 0.116 Uiso 0.5 1 calc R U P B 2
H42F H 0.5697 0.0444 0.0396 0.116 Uiso 0.5 1 calc R U P B 2
C39 C 0.3483(5) 0.11870(9) 0.07366(17) 0.0402(7) Uani 1 1 d . U . . .
C43 C 0.5771(8) 0.06107(16) 0.1598(3) 0.0293(12) Uani 0.5 1 d D U P B 1
H43 H 0.6703 0.0826 0.1627 0.035 Uiso 0.5 1 calc R U P B 1
C44 C 0.6313(17) 0.0373(5) 0.0919(9) 0.058(3) Uani 0.5 1 d D U P B 1
H44A H 0.7653 0.0320 0.0942 0.086 Uiso 0.5 1 calc R U P B 1
H44B H 0.6007 0.0518 0.0462 0.086 Uiso 0.5 1 calc R U P B 1
H44C H 0.5628 0.0126 0.0917 0.086 Uiso 0.5 1 calc R U P B 1
C45 C 0.6119(13) 0.0370(2) 0.2314(4) 0.0551(19) Uani 0.5 1 d D U P B 1
H45A H 0.5383 0.0130 0.2288 0.083 Uiso 0.5 1 calc R U P B 1
H45B H 0.5751 0.0521 0.2752 0.083 Uiso 0.5 1 calc R U P B 1
H45C H 0.7443 0.0304 0.2359 0.083 Uiso 0.5 1 calc R U P B 1
C43' C 0.5695(16) 0.0998(3) 0.2138(6) 0.089(3) Uani 0.5 1 d D U P B 2
H43' H 0.6744 0.1011 0.1778 0.107 Uiso 0.5 1 calc R U P B 2
C44' C 0.554(2) 0.1403(4) 0.2482(9) 0.117(6) Uani 0.5 1 d D U P B 2
H44D H 0.4548 0.1404 0.2850 0.176 Uiso 0.5 1 calc R U P B 2
H44E H 0.5260 0.1593 0.2088 0.176 Uiso 0.5 1 calc R U P B 2
H44F H 0.6726 0.1471 0.2731 0.176 Uiso 0.5 1 calc R U P B 2
C45' C 0.621(2) 0.0680(4) 0.2705(8) 0.136(6) Uani 0.5 1 d D U P B 2
H45D H 0.7501 0.0715 0.2876 0.204 Uiso 0.5 1 calc R U P B 2
H45E H 0.6069 0.0425 0.2468 0.204 Uiso 0.5 1 calc R U P B 2
H45F H 0.5383 0.0697 0.3135 0.204 Uiso 0.5 1 calc R U P B 2
C38 C 0.3383(4) 0.14050(8) 0.02126(17) 0.0345(7) Uani 1 1 d . U . . .
C46 C 0.2972(10) 0.11320(16) 0.2414(3) 0.0384(14) Uani 0.5 1 d D U P B 1
H46 H 0.2941 0.0938 0.2830 0.046 Uiso 0.5 1 calc R U P B 1
C47 C 0.113(2) 0.1341(5) 0.2414(7) 0.084(4) Uani 0.5 1 d D U P B 1
H47A H 0.0816 0.1409 0.2929 0.126 Uiso 0.5 1 calc R U P B 1
H47B H 0.0166 0.1171 0.2199 0.126 Uiso 0.5 1 calc R U P B 1
H47C H 0.1220 0.1578 0.2113 0.126 Uiso 0.5 1 calc R U P B 1
C48 C 0.4468(16) 0.1414(3) 0.2610(6) 0.066(3) Uani 0.5 1 d D U P B 1
H48A H 0.4617 0.1598 0.2196 0.099 Uiso 0.5 1 calc R U P B 1
H48B H 0.5639 0.1274 0.2698 0.099 Uiso 0.5 1 calc R U P B 1
H48C H 0.4135 0.1556 0.3064 0.099 Uiso 0.5 1 calc R U P B 1
C46' C 0.1294(17) 0.0974(3) 0.2004(6) 0.098(3) Uani 0.5 1 d D U P B 2
H46' H 0.0284 0.0854 0.1689 0.117 Uiso 0.5 1 calc R U P B 2
C47' C 0.079(2) 0.1391(4) 0.2080(9) 0.097(5) Uani 0.5 1 d D U P B 2
H47D H 0.1638 0.1516 0.2442 0.146 Uiso 0.5 1 calc R U P B 2
H47E H -0.0492 0.1413 0.2256 0.146 Uiso 0.5 1 calc R U P B 2
H47F H 0.0885 0.1520 0.1593 0.146 Uiso 0.5 1 calc R U P B 2
C48' C 0.111(2) 0.0800(4) 0.2779(7) 0.139(5) Uani 0.5 1 d D U P B 2
H48D H 0.2146 0.0889 0.3100 0.208 Uiso 0.5 1 calc R U P B 2
H48E H 0.1142 0.0515 0.2743 0.208 Uiso 0.5 1 calc R U P B 2
H48F H -0.0069 0.0882 0.2994 0.208 Uiso 0.5 1 calc R U P B 2
 
loop_
 _atom_site_aniso_label
 _atom_site_aniso_U_11
 _atom_site_aniso_U_22
 _atom_site_aniso_U_33
 _atom_site_aniso_U_23
 _atom_site_aniso_U_13
 _atom_site_aniso_U_12
Si1 0.0487(6) 0.0567(6) 0.0454(6) 0.0003(4) -0.0008(4) -0.0038(5)
Si2 0.0457(6) 0.0443(5) 0.0305(5) 0.0051(3) -0.0035(4) 0.0007(4)
O1 0.0631(19) 0.0815(19) 0.0506(16) -0.0142(14) 0.0007(13) -0.0089(14)
O2 0.0632(17) 0.0565(15) 0.0453(14) 0.0186(11) -0.0072(12) -0.0057(12)
N1 0.0286(15) 0.0467(15) 0.0483(16) 0.0016(12) -0.0009(12) -0.0033(11)
N2 0.0320(15) 0.0354(13) 0.0440(15) 0.0054(11) -0.0037(11) -0.0029(10)
C1 0.047(2) 0.050(2) 0.071(3) -0.0043(18) 0.0004(19) 0.0013(16)
C2 0.0314(18) 0.069(2) 0.0380(18) -0.0039(16) -0.0003(14) -0.0108(16)
C3 0.0241(16) 0.064(2) 0.0413(18) 0.0115(15) -0.0043(13) -0.0133(14)
C4 0.040(2) 0.090(3) 0.0372(19) 0.0106(18) -0.0047(15) -0.0186(19)
C5 0.052(2) 0.084(3) 0.056(2) 0.040(2) -0.0138(19) -0.017(2)
C6 0.051(2) 0.068(2) 0.060(3) 0.028(2) -0.0077(19) -0.0093(19)
C7 0.041(2) 0.050(2) 0.054(2) 0.0148(16) -0.0037(16) -0.0017(15)
C8 0.0240(16) 0.0524(19) 0.0384(17) 0.0109(14) -0.0008(13) -0.0048(13)
C9 0.0240(16) 0.0479(18) 0.0358(16) 0.0087(13) -0.0003(12) -0.0017(13)
C10 0.0246(16) 0.0489(18) 0.0378(17) 0.0058(13) -0.0012(13) -0.0019(13)
C11 0.0337(18) 0.0471(18) 0.0464(19) 0.0136(14) -0.0044(14) 0.0019(14)
C12 0.052(2) 0.052(2) 0.062(2) 0.0232(18) -0.0047(18) -0.0046(17)
C13 0.055(2) 0.058(2) 0.045(2) 0.0202(16) 0.0040(17) 0.0002(17)
C14 0.0311(18) 0.0491(18) 0.0451(19) 0.0155(15) 0.0030(14) 0.0029(14)
C15 0.052(2) 0.050(2) 0.0404(19) 0.0044(15) 0.0059(16) 0.0080(16)
C16 0.052(4) 0.059(4) 0.048(4) -0.024(3) 0.019(3) -0.024(3)
C17 0.115(13) 0.081(7) 0.134(15) 0.003(8) 0.048(12) -0.040(9)
C18 0.097(9) 0.088(6) 0.070(6) -0.031(5) 0.036(6) -0.026(6)
C16' 0.105(8) 0.076(6) 0.100(7) -0.024(5) 0.012(6) 0.001(6)
C17' 0.093(10) 0.211(17) 0.155(10) -0.113(11) 0.023(10) 0.028(12)
C18' 0.072(11) 0.059(8) 0.156(11) 0.031(7) -0.024(10) -0.001(9)
C25 0.045(2) 0.0390(17) 0.062(2) 0.0072(15) -0.0056(17) 0.0021(15)
C19 0.030(3) 0.037(3) 0.073(5) -0.005(3) -0.007(3) 0.000(3)
C20 0.051(7) 0.068(9) 0.100(8) 0.010(6) -0.005(6) 0.003(7)
C21 0.054(7) 0.051(8) 0.154(14) 0.034(9) 0.000(8) -0.001(7)
C19' 0.091(7) 0.062(5) 0.071(5) 0.003(4) -0.006(5) -0.006(5)
C20' 0.125(10) 0.095(8) 0.090(6) -0.023(6) -0.010(7) -0.031(7)
C21' 0.093(12) 0.058(7) 0.064(5) 0.008(4) -0.004(7) -0.029(9)
C26 0.0285(17) 0.0502(18) 0.0373(17) 0.0085(14) -0.0047(13) -0.0079(13)
C22 0.048(5) 0.059(4) 0.075(5) 0.020(4) -0.029(4) -0.017(3)
C23 0.066(8) 0.078(7) 0.19(2) 0.040(8) -0.046(10) 0.002(6)
C24 0.082(7) 0.121(8) 0.077(6) 0.006(5) -0.051(5) -0.042(6)
C22' 0.143(9) 0.078(6) 0.070(6) -0.001(5) -0.002(6) -0.020(5)
C23' 0.159(13) 0.078(7) 0.061(7) 0.001(6) 0.044(10) -0.044(8)
C24' 0.136(11) 0.070(7) 0.103(11) 0.024(7) -0.063(10) 0.001(8)
C27 0.0247(16) 0.0479(17) 0.0352(16) 0.0021(13) -0.0034(12) -0.0089(13)
C28 0.038(2) 0.068(2) 0.0327(17) 0.0014(15) 0.0002(14) -0.0068(16)
C29 0.053(2) 0.067(2) 0.044(2) -0.0162(17) 0.0066(17) -0.0065(18)
C30 0.051(2) 0.0472(19) 0.056(2) -0.0114(16) 0.0037(17) 0.0006(16)
C31 0.0382(19) 0.0414(17) 0.0424(18) -0.0020(13) -0.0005(14) -0.0024(14)
C32 0.0202(15) 0.0418(16) 0.0341(15) -0.0006(12) -0.0021(12) -0.0037(12)
C33 0.0237(15) 0.0383(15) 0.0321(15) 0.0018(12) -0.0026(12) -0.0043(12)
C34 0.0221(15) 0.0398(16) 0.0344(15) -0.0001(12) -0.0024(12) -0.0035(12)
C35 0.0333(18) 0.0413(17) 0.0442(18) -0.0062(13) 0.0011(14) -0.0010(13)
C36 0.052(2) 0.0433(19) 0.056(2) -0.0134(16) -0.0030(17) -0.0049(16)
C37 0.055(2) 0.0482(19) 0.0435(19) -0.0093(15) -0.0092(16) -0.0027(16)
C40 0.031(3) 0.031(3) 0.042(3) 0.022(2) -0.014(3) -0.014(2)
C41 0.063(8) 0.045(5) 0.070(5) 0.002(4) -0.037(6) -0.016(5)
C42 0.073(6) 0.071(5) 0.076(5) 0.054(4) -0.038(5) -0.046(4)
C40' 0.079(6) 0.081(6) 0.074(6) 0.012(5) 0.001(4) -0.005(5)
C41' 0.073(9) 0.086(9) 0.127(13) -0.041(9) -0.005(7) -0.026(8)
C42' 0.068(8) 0.086(11) 0.080(8) -0.009(7) 0.013(8) 0.022(9)
C39 0.046(2) 0.0398(17) 0.0341(16) 0.0003(13) -0.0057(14) 0.0017(14)
C43 0.021(3) 0.035(3) 0.032(3) 0.007(2) -0.006(2) 0.003(2)
C44 0.049(7) 0.062(7) 0.063(5) -0.005(5) 0.003(6) 0.010(6)
C45 0.059(5) 0.056(4) 0.049(4) 0.015(3) -0.023(4) 0.016(4)
C43' 0.097(8) 0.101(7) 0.069(6) 0.011(5) -0.015(5) -0.024(6)
C44' 0.154(16) 0.121(8) 0.076(10) -0.035(8) -0.025(10) -0.042(11)
C45' 0.118(11) 0.176(11) 0.112(10) 0.066(9) -0.062(9) -0.046(10)
C38 0.0312(17) 0.0369(15) 0.0353(16) -0.0032(12) -0.0039(13) -0.0003(12)
C46 0.066(4) 0.030(3) 0.019(3) 0.003(2) 0.005(3) 0.002(3)
C47 0.108(8) 0.094(8) 0.049(6) 0.000(6) 0.015(6) 0.038(6)
C48 0.118(8) 0.047(4) 0.033(4) 0.002(3) -0.008(6) -0.008(5)
C46' 0.110(9) 0.086(6) 0.099(7) 0.000(6) 0.039(7) -0.010(6)
C47' 0.083(9) 0.083(7) 0.128(14) -0.035(8) 0.049(9) 0.004(6)
C48' 0.158(14) 0.154(12) 0.107(9) 0.013(8) 0.058(10) -0.034(10)
 
_geom_special_details
;
 All esds (except the esd in the dihedral angle between two l.s. planes)
 are estimated using the full covariance matrix.  The cell esds are taken
 into account individually in the estimation of esds in distances, angles
 and torsion angles; correlations between esds in cell parameters are only
 used when they are defined by crystal symmetry.  An approximate (isotropic)
 treatment of cell esds is used for estimating esds involving l.s. planes.
;
 
loop_
 _geom_bond_atom_site_label_1
 _geom_bond_atom_site_label_2
 _geom_bond_distance
 _geom_bond_site_symmetry_2
 _geom_bond_publ_flag
Si1 C19 1.798(6) . ?
Si1 C15 1.822(4) . ?
Si1 C22' 1.847(9) . ?
Si1 C22 1.880(7) . ?
Si1 C16 1.893(7) . ?
Si1 C16' 1.905(10) . ?
Si1 C19' 1.963(9) . ?
Si2 C40' 1.801(9) . ?
Si2 C46' 1.825(10) . ?
Si2 C39 1.835(3) . ?
Si2 C46 1.857(5) . ?
Si2 C43 1.859(5) . ?
Si2 C40 1.946(5) . ?
Si2 C43' 1.962(9) . ?
O1 C2 1.232(4) . ?
O2 C26 1.231(4) . ?
N1 C10 1.388(4) . ?
N1 C2 1.391(4) . ?
N1 C1 1.470(4) . ?
N2 C26 1.391(4) . ?
N2 C34 1.393(4) . ?
N2 C25 1.468(4) . ?
C1 H1A 0.9800 . ?
C1 H1B 0.9800 . ?
C1 H1C 0.9800 . ?
C2 C3 1.458(5) . ?
C3 C8 1.392(5) . ?
C3 C4 1.410(5) . ?
C4 C5 1.367(6) . ?
C4 H4 0.9500 . ?
C5 C6 1.374(6) . ?
C5 H5 0.9500 . ?
C6 C7 1.375(5) . ?
C6 H6 0.9500 . ?
C7 C8 1.403(5) . ?
C7 H7 0.9500 . ?
C8 C9 1.448(4) . ?
C9 C10 1.367(4) . ?
C9 C14 1.445(5) . ?
C10 C11 1.486(4) . ?
C11 C13 1.494(5) . ?
C11 C12 1.514(5) . ?
C11 H11 1.0000 . ?
C12 C13 1.490(6) . ?
C12 H12A 0.9900 . ?
C12 H12B 0.9900 . ?
C13 H13A 0.9900 . ?
C13 H13B 0.9900 . ?
C14 C15 1.199(5) . ?
C16 C17 1.525(16) . ?
C16 C18 1.540(9) . ?
C16 H16 1.0000 . ?
C17 H17A 0.9800 . ?
C17 H17B 0.9800 . ?
C17 H17C 0.9800 . ?
C18 H18A 0.9800 . ?
C18 H18B 0.9800 . ?
C18 H18C 0.9800 . ?
C16' C18' 1.526(16) . ?
C16' C17' 1.537(12) . ?
C16' H16' 1.0000 . ?
C17' H17D 0.9800 . ?
C17' H17E 0.9800 . ?
C17' H17F 0.9800 . ?
C18' H18D 0.9800 . ?
C18' H18E 0.9800 . ?
C18' H18F 0.9800 . ?
C25 H25A 0.9800 . ?
C25 H25B 0.9800 . ?
C25 H25C 0.9800 . ?
C19 C20 1.518(14) . ?
C19 C21 1.516(14) . ?
C19 H19 1.0000 . ?
C20 H20A 0.9800 . ?
C20 H20B 0.9800 . ?
C20 H20C 0.9800 . ?
C21 H21A 0.9800 . ?
C21 H21B 0.9800 . ?
C21 H21C 0.9800 . ?
C19' C21' 1.523(14) . ?
C19' C20' 1.545(11) . ?
C19' H19' 1.0000 . ?
C20' H20D 0.9800 . ?
C20' H20E 0.9800 . ?
C20' H20F 0.9800 . ?
C21' H21D 0.9800 . ?
C21' H21E 0.9800 . ?
C21' H21F 0.9800 . ?
C26 C27 1.458(5) . ?
C22 C24 1.524(11) . ?
C22 C23 1.551(13) . ?
C22 H22 1.0000 . ?
C23 H23A 0.9800 . ?
C23 H23B 0.9800 . ?
C23 H23C 0.9800 . ?
C24 H24A 0.9800 . ?
C24 H24B 0.9800 . ?
C24 H24C 0.9800 . ?
C22' C24' 1.535(14) . ?
C22' C23' 1.564(14) . ?
C22' H22' 1.0000 . ?
C23' H23D 0.9800 . ?
C23' H23E 0.9800 . ?
C23' H23F 0.9800 . ?
C24' H24D 0.9800 . ?
C24' H24E 0.9800 . ?
C24' H24F 0.9800 . ?
C27 C32 1.399(4) . ?
C27 C28 1.403(4) . ?
C28 C29 1.363(5) . ?
C28 H28 0.9500 . ?
C29 C30 1.384(5) . ?
C29 H29 0.9500 . ?
C30 C31 1.371(5) . ?
C30 H30 0.9500 . ?
C31 C32 1.401(4) . ?
C31 H31 0.9500 . ?
C32 C33 1.449(4) . ?
C33 C34 1.365(4) . ?
C33 C38 1.432(4) . ?
C34 C35 1.482(4) . ?
C35 C37 1.501(5) . ?
C35 C36 1.518(4) . ?
C35 H35 1.0000 . ?
C36 C37 1.492(5) . ?
C36 H36A 0.9900 . ?
C36 H36B 0.9900 . ?
C37 H37A 0.9900 . ?
C37 H37B 0.9900 . ?
C40 C41 1.521(13) . ?
C40 C42 1.524(7) . ?
C40 H40 1.0000 . ?
C41 H41A 0.9800 . ?
C41 H41B 0.9800 . ?
C41 H41C 0.9800 . ?
C42 H42A 0.9800 . ?
C42 H42B 0.9800 . ?
C42 H42C 0.9800 . ?
C40' C41' 1.544(13) . ?
C40' C42' 1.552(14) . ?
C40' H40' 1.0000 . ?
C41' H41D 0.9800 . ?
C41' H41E 0.9800 . ?
C41' H41F 0.9800 . ?
C42' H42D 0.9800 . ?
C42' H42E 0.9800 . ?
C42' H42F 0.9800 . ?
C39 C38 1.200(4) . ?
C43 C44 1.520(13) . ?
C43 C45 1.541(8) . ?
C43 H43 1.0000 . ?
C44 H44A 0.9800 . ?
C44 H44B 0.9800 . ?
C44 H44C 0.9800 . ?
C45 H45A 0.9800 . ?
C45 H45B 0.9800 . ?
C45 H45C 0.9800 . ?
C43' C44' 1.526(14) . ?
C43' C45' 1.533(12) . ?
C43' H43' 1.0000 . ?
C44' H44D 0.9800 . ?
C44' H44E 0.9800 . ?
C44' H44F 0.9800 . ?
C45' H45D 0.9800 . ?
C45' H45E 0.9800 . ?
C45' H45F 0.9800 . ?
C46 C48 1.485(11) . ?
C46 C47 1.504(13) . ?
C46 H46 1.0000 . ?
C47 H47A 0.9800 . ?
C47 H47B 0.9800 . ?
C47 H47C 0.9800 . ?
C48 H48A 0.9800 . ?
C48 H48B 0.9800 . ?
C48 H48C 0.9800 . ?
C46' C47' 1.488(14) . ?
C46' C48' 1.517(13) . ?
C46' H46' 1.0000 . ?
C47' H47D 0.9800 . ?
C47' H47E 0.9800 . ?
C47' H47F 0.9800 . ?
C48' H48D 0.9800 . ?
C48' H48E 0.9800 . ?
C48' H48F 0.9800 . ?
 
loop_
 _geom_angle_atom_site_label_1
 _geom_angle_atom_site_label_2
 _geom_angle_atom_site_label_3
 _geom_angle
 _geom_angle_site_symmetry_1
 _geom_angle_site_symmetry_3
 _geom_angle_publ_flag
C19 Si1 C15 108.2(3) . . ?
C15 Si1 C22' 112.7(4) . . ?
C19 Si1 C22 112.9(3) . . ?
C15 Si1 C22 103.9(3) . . ?
C19 Si1 C16 111.4(3) . . ?
C15 Si1 C16 106.2(2) . . ?
C22 Si1 C16 113.7(4) . . ?
C15 Si1 C16' 108.3(3) . . ?
C22' Si1 C16' 111.1(5) . . ?
C15 Si1 C19' 111.0(3) . . ?
C22' Si1 C19' 105.3(4) . . ?
C16' Si1 C19' 108.3(5) . . ?
C40' Si2 C46' 116.6(5) . . ?
C40' Si2 C39 110.4(3) . . ?
C46' Si2 C39 103.5(4) . . ?
C39 Si2 C46 110.3(2) . . ?
C39 Si2 C43 107.8(2) . . ?
C46 Si2 C43 112.0(3) . . ?
C39 Si2 C40 106.20(19) . . ?
C46 Si2 C40 107.6(3) . . ?
C43 Si2 C40 112.8(3) . . ?
C40' Si2 C43' 107.2(4) . . ?
C46' Si2 C43' 113.6(5) . . ?
C39 Si2 C43' 104.9(3) . . ?
C10 N1 C2 123.3(3) . . ?
C10 N1 C1 120.0(3) . . ?
C2 N1 C1 116.6(3) . . ?
C26 N2 C34 123.6(3) . . ?
C26 N2 C25 115.9(3) . . ?
C34 N2 C25 120.5(3) . . ?
N1 C1 H1A 109.5 . . ?
N1 C1 H1B 109.5 . . ?
H1A C1 H1B 109.5 . . ?
N1 C1 H1C 109.5 . . ?
H1A C1 H1C 109.5 . . ?
H1B C1 H1C 109.5 . . ?
O1 C2 N1 120.2(4) . . ?
O1 C2 C3 123.4(3) . . ?
N1 C2 C3 116.4(3) . . ?
C8 C3 C4 120.1(3) . . ?
C8 C3 C2 121.1(3) . . ?
C4 C3 C2 118.8(3) . . ?
C5 C4 C3 119.4(4) . . ?
C5 C4 H4 120.3 . . ?
C3 C4 H4 120.3 . . ?
C4 C5 C6 120.8(3) . . ?
C4 C5 H5 119.6 . . ?
C6 C5 H5 119.6 . . ?
C5 C6 C7 120.7(4) . . ?
C5 C6 H6 119.7 . . ?
C7 C6 H6 119.7 . . ?
C6 C7 C8 120.1(4) . . ?
C6 C7 H7 119.9 . . ?
C8 C7 H7 119.9 . . ?
C3 C8 C7 118.8(3) . . ?
C3 C8 C9 118.7(3) . . ?
C7 C8 C9 122.5(3) . . ?
C10 C9 C14 121.4(3) . . ?
C10 C9 C8 120.3(3) . . ?
C14 C9 C8 118.1(3) . . ?
C9 C10 N1 120.1(3) . . ?
C9 C10 C11 123.1(3) . . ?
N1 C10 C11 116.7(3) . . ?
C10 C11 C13 121.4(3) . . ?
C10 C11 C12 120.5(3) . . ?
C13 C11 C12 59.4(2) . . ?
C10 C11 H11 114.8 . . ?
C13 C11 H11 114.8 . . ?
C12 C11 H11 114.8 . . ?
C13 C12 C11 59.6(2) . . ?
C13 C12 H12A 117.8 . . ?
C11 C12 H12A 117.8 . . ?
C13 C12 H12B 117.8 . . ?
C11 C12 H12B 117.8 . . ?
H12A C12 H12B 114.9 . . ?
C12 C13 C11 61.0(2) . . ?
C12 C13 H13A 117.7 . . ?
C11 C13 H13A 117.7 . . ?
C12 C13 H13B 117.7 . . ?
C11 C13 H13B 117.7 . . ?
H13A C13 H13B 114.8 . . ?
C15 C14 C9 175.9(3) . . ?
C14 C15 Si1 177.9(3) . . ?
C17 C16 C18 106.8(12) . . ?
C17 C16 Si1 118.6(9) . . ?
C18 C16 Si1 112.0(5) . . ?
C17 C16 H16 106.2 . . ?
C18 C16 H16 106.2 . . ?
Si1 C16 H16 106.2 . . ?
C16 C17 H17A 109.5 . . ?
C16 C17 H17B 109.5 . . ?
H17A C17 H17B 109.5 . . ?
C16 C17 H17C 109.5 . . ?
H17A C17 H17C 109.5 . . ?
H17B C17 H17C 109.5 . . ?
C16 C18 H18A 109.5 . . ?
C16 C18 H18B 109.5 . . ?
H18A C18 H18B 109.5 . . ?
C16 C18 H18C 109.5 . . ?
H18A C18 H18C 109.5 . . ?
H18B C18 H18C 109.5 . . ?
C18' C16' C17' 117.5(14) . . ?
C18' C16' Si1 112.1(10) . . ?
C17' C16' Si1 114.0(9) . . ?
C18' C16' H16' 103.7 . . ?
C17' C16' H16' 103.7 . . ?
Si1 C16' H16' 103.7 . . ?
C16' C17' H17D 109.5 . . ?
C16' C17' H17E 109.5 . . ?
H17D C17' H17E 109.5 . . ?
C16' C17' H17F 109.5 . . ?
H17D C17' H17F 109.5 . . ?
H17E C17' H17F 109.5 . . ?
C16' C18' H18D 109.5 . . ?
C16' C18' H18E 109.5 . . ?
H18D C18' H18E 109.5 . . ?
C16' C18' H18F 109.5 . . ?
H18D C18' H18F 109.5 . . ?
H18E C18' H18F 109.5 . . ?
N2 C25 H25A 109.5 . . ?
N2 C25 H25B 109.5 . . ?
H25A C25 H25B 109.5 . . ?
N2 C25 H25C 109.5 . . ?
H25A C25 H25C 109.5 . . ?
H25B C25 H25C 109.5 . . ?
C20 C19 C21 107.1(10) . . ?
C20 C19 Si1 114.8(9) . . ?
C21 C19 Si1 111.8(9) . . ?
C20 C19 H19 107.6 . . ?
C21 C19 H19 107.6 . . ?
Si1 C19 H19 107.6 . . ?
C19 C20 H20A 109.5 . . ?
C19 C20 H20B 109.5 . . ?
H20A C20 H20B 109.5 . . ?
C19 C20 H20C 109.5 . . ?
H20A C20 H20C 109.5 . . ?
H20B C20 H20C 109.5 . . ?
C19 C21 H21A 109.5 . . ?
C19 C21 H21B 109.5 . . ?
H21A C21 H21B 109.5 . . ?
C19 C21 H21C 109.5 . . ?
H21A C21 H21C 109.5 . . ?
H21B C21 H21C 109.5 . . ?
C21' C19' C20' 108.8(10) . . ?
C21' C19' Si1 114.1(8) . . ?
C20' C19' Si1 116.5(7) . . ?
C21' C19' H19' 105.5 . . ?
C20' C19' H19' 105.5 . . ?
Si1 C19' H19' 105.5 . . ?
C19' C20' H20D 109.5 . . ?
C19' C20' H20E 109.5 . . ?
H20D C20' H20E 109.5 . . ?
C19' C20' H20F 109.5 . . ?
H20D C20' H20F 109.5 . . ?
H20E C20' H20F 109.5 . . ?
C19' C21' H21D 109.5 . . ?
C19' C21' H21E 109.5 . . ?
H21D C21' H21E 109.5 . . ?
C19' C21' H21F 109.5 . . ?
H21D C21' H21F 109.5 . . ?
H21E C21' H21F 109.5 . . ?
O2 C26 N2 120.5(3) . . ?
O2 C26 C27 123.4(3) . . ?
N2 C26 C27 116.1(3) . . ?
C24 C22 C23 115.7(10) . . ?
C24 C22 Si1 110.9(6) . . ?
C23 C22 Si1 117.1(7) . . ?
C24 C22 H22 103.7 . . ?
C23 C22 H22 103.7 . . ?
Si1 C22 H22 103.7 . . ?
C22 C23 H23A 109.5 . . ?
C22 C23 H23B 109.5 . . ?
H23A C23 H23B 109.5 . . ?
C22 C23 H23C 109.5 . . ?
H23A C23 H23C 109.5 . . ?
H23B C23 H23C 109.5 . . ?
C22 C24 H24A 109.5 . . ?
C22 C24 H24B 109.5 . . ?
H24A C24 H24B 109.5 . . ?
C22 C24 H24C 109.5 . . ?
H24A C24 H24C 109.5 . . ?
H24B C24 H24C 109.5 . . ?
C24' C22' C23' 111.7(12) . . ?
C24' C22' Si1 109.8(9) . . ?
C23' C22' Si1 107.5(9) . . ?
C24' C22' H22' 109.3 . . ?
C23' C22' H22' 109.3 . . ?
Si1 C22' H22' 109.3 . . ?
C22' C23' H23D 109.5 . . ?
C22' C23' H23E 109.5 . . ?
H23D C23' H23E 109.5 . . ?
C22' C23' H23F 109.5 . . ?
H23D C23' H23F 109.5 . . ?
H23E C23' H23F 109.5 . . ?
C22' C24' H24D 109.5 . . ?
C22' C24' H24E 109.5 . . ?
H24D C24' H24E 109.5 . . ?
C22' C24' H24F 109.5 . . ?
H24D C24' H24F 109.5 . . ?
H24E C24' H24F 109.5 . . ?
C32 C27 C28 120.1(3) . . ?
C32 C27 C26 121.0(3) . . ?
C28 C27 C26 118.9(3) . . ?
C29 C28 C27 120.3(3) . . ?
C29 C28 H28 119.9 . . ?
C27 C28 H28 119.9 . . ?
C28 C29 C30 119.9(3) . . ?
C28 C29 H29 120.0 . . ?
C30 C29 H29 120.0 . . ?
C31 C30 C29 120.8(3) . . ?
C31 C30 H30 119.6 . . ?
C29 C30 H30 119.6 . . ?
C30 C31 C32 120.5(3) . . ?
C30 C31 H31 119.7 . . ?
C32 C31 H31 119.7 . . ?
C27 C32 C31 118.3(3) . . ?
C27 C32 C33 118.9(3) . . ?
C31 C32 C33 122.7(3) . . ?
C34 C33 C38 121.5(3) . . ?
C34 C33 C32 120.0(3) . . ?
C38 C33 C32 118.4(3) . . ?
C33 C34 N2 120.2(3) . . ?
C33 C34 C35 123.3(3) . . ?
N2 C34 C35 116.4(3) . . ?
C34 C35 C37 121.3(3) . . ?
C34 C35 C36 120.2(3) . . ?
C37 C35 C36 59.2(2) . . ?
C34 C35 H35 114.9 . . ?
C37 C35 H35 114.9 . . ?
C36 C35 H35 114.9 . . ?
C37 C36 C35 59.8(2) . . ?
C37 C36 H36A 117.8 . . ?
C35 C36 H36A 117.8 . . ?
C37 C36 H36B 117.8 . . ?
C35 C36 H36B 117.8 . . ?
H36A C36 H36B 114.9 . . ?
C36 C37 C35 61.0(2) . . ?
C36 C37 H37A 117.7 . . ?
C35 C37 H37A 117.7 . . ?
C36 C37 H37B 117.7 . . ?
C35 C37 H37B 117.7 . . ?
H37A C37 H37B 114.8 . . ?
C41 C40 C42 109.1(7) . . ?
C41 C40 Si2 116.3(6) . . ?
C42 C40 Si2 113.8(4) . . ?
C41 C40 H40 105.6 . . ?
C42 C40 H40 105.6 . . ?
Si2 C40 H40 105.6 . . ?
C40 C41 H41A 109.5 . . ?
C40 C41 H41B 109.5 . . ?
H41A C41 H41B 109.5 . . ?
C40 C41 H41C 109.5 . . ?
H41A C41 H41C 109.5 . . ?
H41B C41 H41C 109.5 . . ?
C40 C42 H42A 109.5 . . ?
C40 C42 H42B 109.5 . . ?
H42A C42 H42B 109.5 . . ?
C40 C42 H42C 109.5 . . ?
H42A C42 H42C 109.5 . . ?
H42B C42 H42C 109.5 . . ?
C41' C40' C42' 111.1(11) . . ?
C41' C40' Si2 108.8(9) . . ?
C42' C40' Si2 112.6(9) . . ?
C41' C40' H40' 108.1 . . ?
C42' C40' H40' 108.1 . . ?
Si2 C40' H40' 108.1 . . ?
C40' C41' H41D 109.5 . . ?
C40' C41' H41E 109.5 . . ?
H41D C41' H41E 109.5 . . ?
C40' C41' H41F 109.5 . . ?
H41D C41' H41F 109.5 . . ?
H41E C41' H41F 109.5 . . ?
C40' C42' H42D 109.5 . . ?
C40' C42' H42E 109.5 . . ?
H42D C42' H42E 109.5 . . ?
C40' C42' H42F 109.5 . . ?
H42D C42' H42F 109.5 . . ?
H42E C42' H42F 109.5 . . ?
C38 C39 Si2 176.2(3) . . ?
C44 C43 C45 109.4(9) . . ?
C44 C43 Si2 116.5(7) . . ?
C45 C43 Si2 114.8(5) . . ?
C44 C43 H43 105.0 . . ?
C45 C43 H43 105.0 . . ?
Si2 C43 H43 105.0 . . ?
C43 C44 H44A 109.5 . . ?
C43 C44 H44B 109.5 . . ?
H44A C44 H44B 109.5 . . ?
C43 C44 H44C 109.5 . . ?
H44A C44 H44C 109.5 . . ?
H44B C44 H44C 109.5 . . ?
C43 C45 H45A 109.5 . . ?
C43 C45 H45B 109.5 . . ?
H45A C45 H45B 109.5 . . ?
C43 C45 H45C 109.5 . . ?
H45A C45 H45C 109.5 . . ?
H45B C45 H45C 109.5 . . ?
C44' C43' C45' 113.7(11) . . ?
C44' C43' Si2 112.3(9) . . ?
C45' C43' Si2 111.4(7) . . ?
C44' C43' H43' 106.3 . . ?
C45' C43' H43' 106.3 . . ?
Si2 C43' H43' 106.3 . . ?
C43' C44' H44D 109.5 . . ?
C43' C44' H44E 109.5 . . ?
H44D C44' H44E 109.5 . . ?
C43' C44' H44F 109.5 . . ?
H44D C44' H44F 109.5 . . ?
H44E C44' H44F 109.5 . . ?
C43' C45' H45D 109.5 . . ?
C43' C45' H45E 109.5 . . ?
H45D C45' H45E 109.5 . . ?
C43' C45' H45F 109.5 . . ?
H45D C45' H45F 109.5 . . ?
H45E C45' H45F 109.5 . . ?
C39 C38 C33 175.6(3) . . ?
C48 C46 C47 108.7(9) . . ?
C48 C46 Si2 112.2(6) . . ?
C47 C46 Si2 115.2(6) . . ?
C48 C46 H46 106.7 . . ?
C47 C46 H46 106.7 . . ?
Si2 C46 H46 106.7 . . ?
C46 C47 H47A 109.5 . . ?
C46 C47 H47B 109.5 . . ?
H47A C47 H47B 109.5 . . ?
C46 C47 H47C 109.5 . . ?
H47A C47 H47C 109.5 . . ?
H47B C47 H47C 109.5 . . ?
C46 C48 H48A 109.5 . . ?
C46 C48 H48B 109.5 . . ?
H48A C48 H48B 109.5 . . ?
C46 C48 H48C 109.5 . . ?
H48A C48 H48C 109.5 . . ?
H48B C48 H48C 109.5 . . ?
C47' C46' C48' 105.9(11) . . ?
C47' C46' Si2 117.8(8) . . ?
C48' C46' Si2 114.3(9) . . ?
C47' C46' H46' 106.0 . . ?
C48' C46' H46' 106.0 . . ?
Si2 C46' H46' 106.0 . . ?
C46' C47' H47D 109.5 . . ?
C46' C47' H47E 109.5 . . ?
H47D C47' H47E 109.5 . . ?
C46' C47' H47F 109.5 . . ?
H47D C47' H47F 109.5 . . ?
H47E C47' H47F 109.5 . . ?
C46' C48' H48D 109.5 . . ?
C46' C48' H48E 109.5 . . ?
H48D C48' H48E 109.5 . . ?
C46' C48' H48F 109.5 . . ?
H48D C48' H48F 109.5 . . ?
H48E C48' H48F 109.5 . . ?
 
loop_
 _geom_torsion_atom_site_label_1
 _geom_torsion_atom_site_label_2
 _geom_torsion_atom_site_label_3
 _geom_torsion_atom_site_label_4
 _geom_torsion
 _geom_torsion_site_symmetry_1
 _geom_torsion_site_symmetry_2
 _geom_torsion_site_symmetry_3
 _geom_torsion_site_symmetry_4
 _geom_torsion_publ_flag
C10 N1 C2 O1 175.9(3) . . . . ?
C1 N1 C2 O1 -5.6(5) . . . . ?
C10 N1 C2 C3 -3.9(4) . . . . ?
C1 N1 C2 C3 174.6(3) . . . . ?
O1 C2 C3 C8 -177.7(3) . . . . ?
N1 C2 C3 C8 2.1(4) . . . . ?
O1 C2 C3 C4 3.1(5) . . . . ?
N1 C2 C3 C4 -177.1(3) . . . . ?
C8 C3 C4 C5 -0.5(5) . . . . ?
C2 C3 C4 C5 178.7(3) . . . . ?
C3 C4 C5 C6 1.1(6) . . . . ?
C4 C5 C6 C7 -0.8(6) . . . . ?
C5 C6 C7 C8 0.0(6) . . . . ?
C4 C3 C8 C7 -0.3(5) . . . . ?
C2 C3 C8 C7 -179.5(3) . . . . ?
C4 C3 C8 C9 179.3(3) . . . . ?
C2 C3 C8 C9 0.1(4) . . . . ?
C6 C7 C8 C3 0.6(5) . . . . ?
C6 C7 C8 C9 -179.0(3) . . . . ?
C3 C8 C9 C10 -0.8(4) . . . . ?
C7 C8 C9 C10 178.8(3) . . . . ?
C3 C8 C9 C14 -176.9(3) . . . . ?
C7 C8 C9 C14 2.7(5) . . . . ?
C14 C9 C10 N1 175.1(3) . . . . ?
C8 C9 C10 N1 -0.8(4) . . . . ?
C14 C9 C10 C11 -2.8(5) . . . . ?
C8 C9 C10 C11 -178.7(3) . . . . ?
C2 N1 C10 C9 3.3(5) . . . . ?
C1 N1 C10 C9 -175.1(3) . . . . ?
C2 N1 C10 C11 -178.6(3) . . . . ?
C1 N1 C10 C11 3.0(4) . . . . ?
C9 C10 C11 C13 -45.5(5) . . . . ?
N1 C10 C11 C13 136.5(3) . . . . ?
C9 C10 C11 C12 -116.0(4) . . . . ?
N1 C10 C11 C12 66.0(4) . . . . ?
C10 C11 C12 C13 110.7(4) . . . . ?
C10 C11 C13 C12 -109.3(4) . . . . ?
C19 Si1 C16 C17 177.7(12) . . . . ?
C15 Si1 C16 C17 -64.7(13) . . . . ?
C22' Si1 C16 C17 42.6(13) . . . . ?
C22 Si1 C16 C17 48.9(13) . . . . ?
C16' Si1 C16 C17 -166.1(13) . . . . ?
C19' Si1 C16 C17 119.6(13) . . . . ?
C19 Si1 C16 C18 52.6(8) . . . . ?
C15 Si1 C16 C18 170.2(7) . . . . ?
C22' Si1 C16 C18 -82.5(8) . . . . ?
C22 Si1 C16 C18 -76.2(8) . . . . ?
C16' Si1 C16 C18 68.8(8) . . . . ?
C19' Si1 C16 C18 -5.4(11) . . . . ?
C15 Si1 C19 C20 -64.1(10) . . . . ?
C22' Si1 C19 C20 122.5(11) . . . . ?
C22 Si1 C19 C20 -178.4(10) . . . . ?
C16 Si1 C19 C20 52.3(11) . . . . ?
C16' Si1 C19 C20 36.6(11) . . . . ?
C19' Si1 C19 C20 -167.2(11) . . . . ?
C15 Si1 C19 C21 58.2(9) . . . . ?
C22' Si1 C19 C21 -115.2(11) . . . . ?
C22 Si1 C19 C21 -56.1(10) . . . . ?
C16 Si1 C19 C21 174.6(9) . . . . ?
C16' Si1 C19 C21 158.9(10) . . . . ?
C19' Si1 C19 C21 -44.9(10) . . . . ?
C34 N2 C26 O2 -175.4(3) . . . . ?
C25 N2 C26 O2 5.3(4) . . . . ?
C34 N2 C26 C27 5.1(4) . . . . ?
C25 N2 C26 C27 -174.2(3) . . . . ?
C19 Si1 C22 C24 -67.2(7) . . . . ?
C15 Si1 C22 C24 175.9(6) . . . . ?
C22' Si1 C22 C24 67.8(7) . . . . ?
C16 Si1 C22 C24 60.9(7) . . . . ?
C16' Si1 C22 C24 -1.5(11) . . . . ?
C19' Si1 C22 C24 -77.7(7) . . . . ?
C19 Si1 C22 C23 157.0(10) . . . . ?
C15 Si1 C22 C23 40.1(10) . . . . ?
C22' Si1 C22 C23 -68.0(10) . . . . ?
C16 Si1 C22 C23 -74.9(10) . . . . ?
C16' Si1 C22 C23 -137.2(11) . . . . ?
C19' Si1 C22 C23 146.5(11) . . . . ?
C19 Si1 C22' C24' 117.4(9) . . . . ?
C15 Si1 C22' C24' -55.8(9) . . . . ?
C22 Si1 C22' C24' 34.7(8) . . . . ?
C16 Si1 C22' C24' -152.5(10) . . . . ?
C16' Si1 C22' C24' -177.6(8) . . . . ?
C19' Si1 C22' C24' 65.3(9) . . . . ?
C19 Si1 C22' C23' -120.9(10) . . . . ?
C15 Si1 C22' C23' 65.8(11) . . . . ?
C22 Si1 C22' C23' 156.4(12) . . . . ?
C16 Si1 C22' C23' -30.8(10) . . . . ?
C16' Si1 C22' C23' -55.9(11) . . . . ?
C19' Si1 C22' C23' -173.0(10) . . . . ?
O2 C26 C27 C32 177.8(3) . . . . ?
N2 C26 C27 C32 -2.8(4) . . . . ?
O2 C26 C27 C28 -3.2(5) . . . . ?
N2 C26 C27 C28 176.3(3) . . . . ?
C32 C27 C28 C29 0.9(5) . . . . ?
C26 C27 C28 C29 -178.2(3) . . . . ?
C27 C28 C29 C30 -1.6(5) . . . . ?
C28 C29 C30 C31 1.4(6) . . . . ?
C29 C30 C31 C32 -0.3(5) . . . . ?
C28 C27 C32 C31 0.2(4) . . . . ?
C26 C27 C32 C31 179.2(3) . . . . ?
C28 C27 C32 C33 -179.2(3) . . . . ?
C26 C27 C32 C33 -0.2(4) . . . . ?
C30 C31 C32 C27 -0.4(5) . . . . ?
C30 C31 C32 C33 178.9(3) . . . . ?
C27 C32 C33 C34 1.2(4) . . . . ?
C31 C32 C33 C34 -178.2(3) . . . . ?
C27 C32 C33 C38 177.7(3) . . . . ?
C31 C32 C33 C38 -1.7(4) . . . . ?
C38 C33 C34 N2 -175.5(3) . . . . ?
C32 C33 C34 N2 0.9(4) . . . . ?
C38 C33 C34 C35 1.5(4) . . . . ?
C32 C33 C34 C35 178.0(3) . . . . ?
C26 N2 C34 C33 -4.3(4) . . . . ?
C25 N2 C34 C33 174.9(3) . . . . ?
C26 N2 C34 C35 178.4(3) . . . . ?
C25 N2 C34 C35 -2.3(4) . . . . ?
C33 C34 C35 C37 46.4(4) . . . . ?
N2 C34 C35 C37 -136.5(3) . . . . ?
C33 C34 C35 C36 116.6(3) . . . . ?
N2 C34 C35 C36 -66.3(4) . . . . ?
C34 C35 C36 C37 -110.7(4) . . . . ?
C34 C35 C37 C36 108.9(3) . . . . ?
C46' Si2 C40' C41' 56.2(11) . . . . ?
C39 Si2 C40' C41' -61.5(10) . . . . ?
C46 Si2 C40' C41' 112.0(10) . . . . ?
C43 Si2 C40' C41' -160.3(10) . . . . ?
C40 Si2 C40' C41' 34.7(9) . . . . ?
C43' Si2 C40' C41' -175.2(9) . . . . ?
C46' Si2 C40' C42' 179.9(11) . . . . ?
C39 Si2 C40' C42' 62.1(11) . . . . ?
C46 Si2 C40' C42' -124.3(11) . . . . ?
C43 Si2 C40' C42' -36.7(10) . . . . ?
C40 Si2 C40' C42' 158.3(12) . . . . ?
C43' Si2 C40' C42' -51.6(11) . . . . ?
C40' Si2 C43 C44 44.2(9) . . . . ?
C46' Si2 C43 C44 134.5(11) . . . . ?
C39 Si2 C43 C44 -59.3(9) . . . . ?
C46 Si2 C43 C44 179.2(8) . . . . ?
C40 Si2 C43 C44 57.7(9) . . . . ?
C43' Si2 C43 C44 -154.2(10) . . . . ?
C40' Si2 C43 C45 -85.5(6) . . . . ?
C46' Si2 C43 C45 4.8(10) . . . . ?
C39 Si2 C43 C45 171.1(4) . . . . ?
C46 Si2 C43 C45 49.6(5) . . . . ?
C40 Si2 C43 C45 -72.0(5) . . . . ?
C43' Si2 C43 C45 76.1(6) . . . . ?
C40' Si2 C46 C48 121.2(7) . . . . ?
C46' Si2 C46 C48 -155.4(8) . . . . ?
C39 Si2 C46 C48 -65.2(6) . . . . ?
C43 Si2 C46 C48 54.8(6) . . . . ?
C40 Si2 C46 C48 179.3(6) . . . . ?
C43' Si2 C46 C48 32.5(6) . . . . ?
C40' Si2 C46 C47 -113.7(9) . . . . ?
C46' Si2 C46 C47 -30.3(9) . . . . ?
C39 Si2 C46 C47 59.9(8) . . . . ?
C43 Si2 C46 C47 179.9(8) . . . . ?
C40 Si2 C46 C47 -55.6(8) . . . . ?
C43' Si2 C46 C47 157.6(9) . . . . ?
C40' Si2 C46' C47' -164.6(10) . . . . ?
C39 Si2 C46' C47' -43.1(12) . . . . ?
C46 Si2 C46' C47' 62.2(11) . . . . ?
C43 Si2 C46' C47' 123.4(10) . . . . ?
C40 Si2 C46' C47' -144.7(12) . . . . ?
C43' Si2 C46' C47' 70.1(12) . . . . ?
C40' Si2 C46' C48' 70.2(11) . . . . ?
C39 Si2 C46' C48' -168.3(9) . . . . ?
C46 Si2 C46' C48' -63.0(9) . . . . ?
C43 Si2 C46' C48' -1.8(15) . . . . ?
C40 Si2 C46' C48' 90.1(9) . . . . ?
C43' Si2 C46' C48' -55.2(10) . . . . ?
 
_refine_diff_density_max    0.409
_refine_diff_density_min   -0.434
_refine_diff_density_rms    0.065

_shelxl_version_number 2013-3

_shelx_res_file
;
TITL CyclophenylAu_201215_0m in P2(1)/c
CELL 0.71073 7.1879 34.4015 17.8555 90.000 91.042 90.000
ZERR 8.00 0.0012 0.0058 0.0030 0.000 0.003 0.000
LATT 1
SYMM -x, y+1/2, -z+1/2
SFAC C  H  N  O  Si
UNIT 192 264 8 8 8
OMIT 0 4 2
OMIT  -3.00  50.00
L.S. 30
ACTA
BOND $H
FMAP 2
PLAN 10
CONF
SIZE 0.40 0.36 0.31
SIMU 0.04 C40 > C48'
DELU 0.01 C40 > C48'
SIMU 0.04 C16 > C24'
DELU 0.01 C16 > C24'
DFIX 1.85 Si1 C16
DFIX 1.85 Si1 C22
DFIX 1.85 Si1 C19
DFIX 1.85 Si1 C16'
DFIX 1.85 Si1 C22'
DFIX 1.85 Si1 C19'
DFIX 1.85 Si2 C40
DFIX 1.85 Si2 C43
DFIX 1.85 Si2 C46
DFIX 1.85 Si2 C40'
DFIX 1.85 Si2 C43'
DFIX 1.85 Si2 C46'
DFIX 1.50 C40 C41
DFIX 1.50 C40 C42
DFIX 1.50 C40' C41'
DFIX 1.50 C40' C42'
DFIX 1.50 C43 C44
DFIX 1.50 C43 C45
DFIX 1.50 C43' C44'
DFIX 1.50 C43' C45'
DFIX 1.50 C46' C47'
DFIX 1.50 C46' C48'
DFIX 1.50 C46 C47
DFIX 1.50 C46 C48
DFIX 1.50 C16 C17
DFIX 1.50 C16 C18
DFIX 1.50 C16' C17'
DFIX 1.50 C16' C18'
DFIX 1.50 C19 C20
DFIX 1.50 C19 C21
DFIX 1.50 C19' C20'
DFIX 1.50 C19' C21'
DFIX 1.50 C22' C23'
DFIX 1.50 C22' C24'
DFIX 1.50 C22 C23
DFIX 1.50 C22 C24
DANG 2.50 C17 C18
DANG 2.50 C17' C18'
DANG 2.50 C20 C21
DANG 2.50 C20' C21'
DANG 2.50 C23' C24'
DANG 2.50 C23 C24
DANG 2.50 C41 C42
DANG 2.50 C41' C42'
DANG 2.50 C44 C45
DANG 2.50 C44' C45'
DANG 2.50 C47 C48
DANG 2.50 C47' C48'
TEMP -123.000
WGHT    0.129200    4.406900
FVAR       0.11036
SI1   5    0.856543    0.093290    0.566031    11.00000    0.04871    0.05668 =
         0.04536    0.00034   -0.00084   -0.00377
SI2   5    0.347104    0.085760    0.154458    11.00000    0.04571    0.04429 =
         0.03054    0.00508   -0.00354    0.00069
O1    4    0.756781    0.233190    0.957426    11.00000    0.06309    0.08145 =
         0.05060   -0.01422    0.00075   -0.00887
O2    4    0.271197    0.230147   -0.233635    11.00000    0.06325    0.05651 =
         0.04526    0.01856   -0.00715   -0.00565
N1    3    0.751134    0.228594    0.830272    11.00000    0.02864    0.04674 =
         0.04825    0.00158   -0.00089   -0.00325
N2    3    0.255835    0.223977   -0.106886    11.00000    0.03202    0.03540 =
         0.04395    0.00542   -0.00369   -0.00289
C1    1    0.689155    0.269286    0.826514    11.00000    0.04654    0.04973 =
         0.07062   -0.00429    0.00043    0.00133
AFIX 137
H1A   2    0.794376    0.285954    0.813589    11.00000   -1.50000
H1B   2    0.641173    0.277144    0.875257    11.00000   -1.50000
H1C   2    0.590602    0.271886    0.788191    11.00000   -1.50000
AFIX   0
C2    1    0.774014    0.212666    0.901428    11.00000    0.03144    0.06929 =
         0.03804   -0.00393   -0.00029   -0.01078
C3    1    0.818880    0.171364    0.904814    11.00000    0.02408    0.06368 =
         0.04132    0.01149   -0.00427   -0.01325
C4    1    0.835166    0.153284    0.975519    11.00000    0.04005    0.08951 =
         0.03722    0.01059   -0.00475   -0.01862
AFIX  43
H4    2    0.819575    0.167992    1.019996    11.00000   -1.20000
AFIX   0
C5    1    0.873582    0.114411    0.979501    11.00000    0.05159    0.08447 =
         0.05584    0.03965   -0.01381   -0.01720
AFIX  43
H5    2    0.882514    0.102066    1.027022    11.00000   -1.20000
AFIX   0
C6    1    0.899436    0.092980    0.915567    11.00000    0.05070    0.06805 =
         0.06014    0.02788   -0.00770   -0.00935
AFIX  43
H6    2    0.927599    0.066064    0.919404    11.00000   -1.20000
AFIX   0
C7    1    0.884959    0.110094    0.846086    11.00000    0.04143    0.04957 =
         0.05388    0.01478   -0.00366   -0.00171
AFIX  43
H7    2    0.903205    0.094990    0.802287    11.00000   -1.20000
AFIX   0
C8    1    0.843307    0.149805    0.839778    11.00000    0.02403    0.05240 =
         0.03835    0.01089   -0.00081   -0.00485
C9    1    0.823592    0.169212    0.768096    11.00000    0.02401    0.04786 =
         0.03579    0.00868   -0.00026   -0.00168
C10   1    0.779523    0.207829    0.764821    11.00000    0.02460    0.04886 =
         0.03777    0.00576   -0.00120   -0.00191
C11   1    0.753425    0.229357    0.693222    11.00000    0.03365    0.04707 =
         0.04645    0.01363   -0.00437    0.00185
AFIX  13
H11   2    0.620790    0.233229    0.677052    11.00000   -1.20000
AFIX   0
C12   1    0.883081    0.262288    0.673093    11.00000    0.05166    0.05247 =
         0.06179    0.02317   -0.00467   -0.00463
AFIX  23
H12A  2    0.828478    0.285312    0.647726    11.00000   -1.20000
H12B  2    0.988618    0.267950    0.707789    11.00000   -1.20000
AFIX   0
C13   1    0.886956    0.225021    0.630631    11.00000    0.05540    0.05796 =
         0.04507    0.02018    0.00401    0.00018
AFIX  23
H13A  2    0.995432    0.207706    0.638838    11.00000   -1.20000
H13B  2    0.835441    0.225052    0.578831    11.00000   -1.20000
AFIX   0
C14   1    0.839829    0.146098    0.700927    11.00000    0.03112    0.04913 =
         0.04515    0.01552    0.00295    0.00289
C15   1    0.849908    0.124939    0.647780    11.00000    0.05183    0.05017 =
         0.04040    0.00436    0.00595    0.00804
PART 1
C16   1    1.072331    0.107381    0.513243    10.50000    0.05224    0.05888 =
         0.04819   -0.02382    0.01904   -0.02445
AFIX  13
H16   2    1.178615    0.105473    0.549980    10.50000   -1.20000
AFIX   0
C17   1    1.082443    0.147973    0.479266    10.50000    0.11539    0.08150 =
         0.13378    0.00312    0.04844   -0.04023
AFIX 137
H17A  2    1.210969    0.153602    0.465420    10.50000   -1.50000
H17B  2    1.041263    0.167158    0.515997    10.50000   -1.50000
H17C  2    1.001597    0.149248    0.434544    10.50000   -1.50000
AFIX   0
C18   1    1.114676    0.078444    0.450011    10.50000    0.09734    0.08817 =
         0.07040   -0.03085    0.03641   -0.02648
AFIX 137
H18A  2    1.012858    0.078847    0.412764    10.50000   -1.50000
H18B  2    1.127055    0.052218    0.470943    10.50000   -1.50000
H18C  2    1.231066    0.085851    0.426080    10.50000   -1.50000
PART 2
AFIX   0
C16'  1    1.084537    0.065063    0.569360    10.50000    0.10516    0.07637 =
         0.10040   -0.02354    0.01233    0.00067
AFIX  13
H16'  2    1.181196    0.085697    0.576597    10.50000   -1.20000
AFIX   0
C17'  1    1.135470    0.046115    0.494537    10.50000    0.09335    0.21072 =
         0.15480   -0.11291    0.02289    0.02842
AFIX 137
H17D  2    1.245965    0.029763    0.501826    10.50000   -1.50000
H17E  2    1.161599    0.066408    0.457674    10.50000   -1.50000
H17F  2    1.031325    0.030089    0.476398    10.50000   -1.50000
AFIX   0
C18'  1    1.103848    0.040262    0.639962    10.50000    0.07189    0.05911 =
         0.15557    0.03108   -0.02355   -0.00145
AFIX 137
H18D  2    1.012369    0.019147    0.637963    10.50000   -1.50000
H18E  2    1.082045    0.056444    0.684111    10.50000   -1.50000
H18F  2    1.229529    0.029271    0.643139    10.50000   -1.50000
PART 0
AFIX   0
C25   1    0.193894    0.264590   -0.103802    11.00000    0.04541    0.03898 =
         0.06241    0.00719   -0.00555    0.00210
AFIX 137
H25A  2    0.299387    0.281275   -0.089761    11.00000   -1.50000
H25B  2    0.096267    0.267175   -0.066523    11.00000   -1.50000
H25C  2    0.144671    0.272436   -0.153064    11.00000   -1.50000
PART 1
AFIX   0
C19   1    0.869039    0.043810    0.598182    10.50000    0.03014    0.03704 =
         0.07250   -0.00520   -0.00738    0.00042
AFIX  13
H19   2    0.863721    0.026597    0.553064    10.50000   -1.20000
AFIX   0
C20   1    1.044710    0.033672    0.642418    10.50000    0.05072    0.06844 =
         0.10003    0.01010   -0.00511    0.00288
AFIX 137
H20A  2    1.036621    0.044263    0.693206    10.50000   -1.50000
H20B  2    1.152790    0.044855    0.617601    10.50000   -1.50000
H20C  2    1.058146    0.005353    0.645009    10.50000   -1.50000
AFIX   0
C21   1    0.705470    0.033425    0.646732    10.50000    0.05440    0.05148 =
         0.15409    0.03444    0.00015   -0.00124
AFIX 137
H21A  2    0.718101    0.006481    0.663899    10.50000   -1.50000
H21B  2    0.589502    0.036251    0.617527    10.50000   -1.50000
H21C  2    0.703076    0.050831    0.690152    10.50000   -1.50000
PART 2
AFIX   0
C19'  1    0.650351    0.055873    0.566461    10.50000    0.09088    0.06236 =
         0.07108    0.00269   -0.00590   -0.00563
AFIX  13
H19'  2    0.534373    0.071921    0.566817    10.50000   -1.20000
AFIX   0
C20'  1    0.630348    0.029203    0.497178    10.50000    0.12489    0.09484 =
         0.09041   -0.02278   -0.00963   -0.03146
AFIX 137
H20D  2    0.735650    0.011132    0.495996    10.50000   -1.50000
H20E  2    0.628720    0.045085    0.451607    10.50000   -1.50000
H20F  2    0.513983    0.014473    0.499979    10.50000   -1.50000
AFIX   0
C21'  1    0.643714    0.030910    0.636776    10.50000    0.09318    0.05799 =
         0.06375    0.00773   -0.00399   -0.02884
AFIX 137
H21D  2    0.521417    0.018475    0.639807    10.50000   -1.50000
H21E  2    0.664956    0.047296    0.681006    10.50000   -1.50000
H21F  2    0.740498    0.010891    0.634772    10.50000   -1.50000
PART 0
AFIX   0
C26   1    0.284452    0.209013   -0.178133    11.00000    0.02846    0.05020 =
         0.03732    0.00848   -0.00472   -0.00793
PART 1
C22   1    0.633249    0.104447    0.513931    10.50000    0.04849    0.05900 =
         0.07474    0.01959   -0.02869   -0.01692
AFIX  13
H22   2    0.535870    0.091800    0.544947    10.50000   -1.20000
AFIX   0
C23   1    0.571744    0.147627    0.510453    10.50000    0.06627    0.07810 =
         0.18894    0.04039   -0.04622    0.00197
AFIX 137
H23A  2    0.668041    0.163053    0.486123    10.50000   -1.50000
H23B  2    0.553532    0.157372    0.561370    10.50000   -1.50000
H23C  2    0.454793    0.149742    0.481669    10.50000   -1.50000
AFIX   0
C24   1    0.622437    0.082327    0.440047    10.50000    0.08170    0.12083 =
         0.07654    0.00628   -0.05058   -0.04202
AFIX 137
H24A  2    0.498706    0.085799    0.417062    10.50000   -1.50000
H24B  2    0.644654    0.054624    0.449348    10.50000   -1.50000
H24C  2    0.716997    0.092333    0.406210    10.50000   -1.50000
PART 2
AFIX   0
C22'  1    0.829425    0.120246    0.477031    10.50000    0.14335    0.07763 =
         0.06958   -0.00143   -0.00167   -0.01977
AFIX  13
H22'  2    0.824232    0.101376    0.434445    10.50000   -1.20000
AFIX   0
C23'  1    1.004256    0.146901    0.469045    10.50000    0.15872    0.07798 =
         0.06099    0.00081    0.04419   -0.04355
AFIX 137
H23D  2    1.012480    0.155878    0.417121    10.50000   -1.50000
H23E  2    1.116541    0.132152    0.482607    10.50000   -1.50000
H23F  2    0.993276    0.169374    0.502404    10.50000   -1.50000
AFIX   0
C24'  1    0.648741    0.144005    0.477520    10.50000    0.13624    0.06988 =
         0.10305    0.02408   -0.06314    0.00078
AFIX 137
H24D  2    0.654996    0.163074    0.518262    10.50000   -1.50000
H24E  2    0.542957    0.126554    0.485060    10.50000   -1.50000
H24F  2    0.632891    0.157557    0.429552    10.50000   -1.50000
PART 0
AFIX   0
C27   1    0.328087    0.167693   -0.182017    11.00000    0.02469    0.04790 =
         0.03516    0.00210   -0.00336   -0.00886
C28   1    0.347597    0.150319   -0.252555    11.00000    0.03805    0.06827 =
         0.03267    0.00143    0.00023   -0.00684
AFIX  43
H28   2    0.335852    0.165658   -0.296630    11.00000   -1.20000
AFIX   0
C29   1    0.383331    0.111522   -0.258071    11.00000    0.05319    0.06729 =
         0.04364   -0.01620    0.00655   -0.00646
AFIX  43
H29   2    0.393218    0.099730   -0.305945    11.00000   -1.20000
AFIX   0
C30   1    0.405198    0.089325   -0.193879    11.00000    0.05111    0.04725 =
         0.05576   -0.01144    0.00371    0.00062
AFIX  43
H30   2    0.432817    0.062414   -0.198039    11.00000   -1.20000
AFIX   0
C31   1    0.387500    0.105685   -0.124339    11.00000    0.03816    0.04142 =
         0.04241   -0.00202   -0.00047   -0.00238
AFIX  43
H31   2    0.402298    0.089997   -0.080851    11.00000   -1.20000
AFIX   0
C32   1    0.347774    0.145345   -0.116923    11.00000    0.02017    0.04180 =
         0.03410   -0.00060   -0.00208   -0.00367
C33   1    0.324613    0.163941   -0.044855    11.00000    0.02375    0.03828 =
         0.03214    0.00183   -0.00256   -0.00427
C34   1    0.280959    0.202505   -0.041348    11.00000    0.02214    0.03982 =
         0.03443   -0.00011   -0.00243   -0.00355
C35   1    0.249010    0.223333    0.029920    11.00000    0.03330    0.04125 =
         0.04421   -0.00620    0.00110   -0.00101
AFIX  13
H35   2    0.115277    0.226970    0.042731    11.00000   -1.20000
AFIX   0
C36   1    0.377082    0.256277    0.054220    11.00000    0.05216    0.04329 =
         0.05612   -0.01338   -0.00300   -0.00488
AFIX  23
H36A  2    0.484638    0.262247    0.022330    11.00000   -1.20000
H36B  2    0.320454    0.279098    0.078731    11.00000   -1.20000
AFIX   0
C37   1    0.379239    0.218712    0.096024    11.00000    0.05487    0.04821 =
         0.04353   -0.00927   -0.00920   -0.00273
AFIX  23
H37A  2    0.324501    0.218388    0.146499    11.00000   -1.20000
H37B  2    0.488560    0.201549    0.090141    11.00000   -1.20000
PART 1
AFIX   0
C40   1    0.142081    0.049768    0.136657    10.50000    0.03067    0.03067 =
         0.04199    0.02201   -0.01363   -0.01406
AFIX  13
H40   2    0.026669    0.065985    0.137408    10.50000   -1.20000
AFIX   0
C41   1    0.138033    0.029217    0.061244    10.50000    0.06275    0.04525 =
         0.07017    0.00207   -0.03701   -0.01551
AFIX 137
H41A  2    0.222989    0.006942    0.063000    10.50000   -1.50000
H41B  2    0.177121    0.047327    0.022194    10.50000   -1.50000
H41C  2    0.011380    0.020137    0.049938    10.50000   -1.50000
AFIX   0
C42   1    0.119456    0.019759    0.198588    10.50000    0.07321    0.07134 =
         0.07590    0.05393   -0.03759   -0.04638
AFIX 137
H42A  2   -0.004578    0.008039    0.194476    10.50000   -1.50000
H42B  2    0.134173    0.032451    0.247474    10.50000   -1.50000
H42C  2    0.214221   -0.000515    0.193646    10.50000   -1.50000
PART 2
AFIX   0
C40'  1    0.376511    0.036183    0.124520    10.50000    0.07852    0.08126 =
         0.07356    0.01223    0.00093   -0.00499
AFIX  13
H40'  2    0.371907    0.019126    0.169798    10.50000   -1.20000
AFIX   0
C41'  1    0.211981    0.025092    0.071982    10.50000    0.07325    0.08571 =
         0.12660   -0.04071   -0.00451   -0.02626
AFIX 137
H41D  2    0.224486    0.038554    0.023966    10.50000   -1.50000
H41E  2    0.094803    0.032745    0.095012    10.50000   -1.50000
H41F  2    0.212223   -0.003062    0.063621    10.50000   -1.50000
AFIX   0
C42'  1    0.565617    0.029274    0.086056    10.50000    0.06765    0.08558 =
         0.08010   -0.00878    0.01295    0.02229
AFIX 137
H42D  2    0.579218    0.001580    0.074521    10.50000   -1.50000
H42E  2    0.667297    0.037490    0.119768    10.50000   -1.50000
H42F  2    0.569719    0.044391    0.039595    10.50000   -1.50000
PART 0
AFIX   0
C39   1    0.348328    0.118700    0.073657    11.00000    0.04632    0.03979 =
         0.03413    0.00033   -0.00566    0.00175
PART 1
C43   1    0.577089    0.061071    0.159842    10.50000    0.02131    0.03468 =
         0.03164    0.00667   -0.00621    0.00257
AFIX  13
H43   2    0.670341    0.082616    0.162688    10.50000   -1.20000
AFIX   0
C44   1    0.631295    0.037273    0.091947    10.50000    0.04866    0.06171 =
         0.06263   -0.00538    0.00327    0.01044
AFIX 137
H44A  2    0.765275    0.032010    0.094166    10.50000   -1.50000
H44B  2    0.600731    0.051826    0.046171    10.50000   -1.50000
H44C  2    0.562839    0.012636    0.091713    10.50000   -1.50000
AFIX   0
C45   1    0.611852    0.036956    0.231439    10.50000    0.05914    0.05643 =
         0.04876    0.01468   -0.02321    0.01587
AFIX 137
H45A  2    0.538319    0.012991    0.228762    10.50000   -1.50000
H45B  2    0.575051    0.052113    0.275218    10.50000   -1.50000
H45C  2    0.744301    0.030424    0.235883    10.50000   -1.50000
PART 2
AFIX   0
C43'  1    0.569495    0.099831    0.213758    10.50000    0.09686    0.10124 =
         0.06915    0.01051   -0.01539   -0.02449
AFIX  13
H43'  2    0.674353    0.101074    0.177789    10.50000   -1.20000
AFIX   0
C44'  1    0.554396    0.140267    0.248243    10.50000    0.15393    0.12125 =
         0.07595   -0.03529   -0.02462   -0.04191
AFIX 137
H44D  2    0.454817    0.140418    0.285009    10.50000   -1.50000
H44E  2    0.526043    0.159270    0.208772    10.50000   -1.50000
H44F  2    0.672630    0.147081    0.273094    10.50000   -1.50000
AFIX   0
C45'  1    0.620825    0.068003    0.270534    10.50000    0.11815    0.17606 =
         0.11164    0.06642   -0.06175   -0.04638
AFIX 137
H45D  2    0.750106    0.071499    0.287586    10.50000   -1.50000
H45E  2    0.606873    0.042454    0.246814    10.50000   -1.50000
H45F  2    0.538317    0.069706    0.313505    10.50000   -1.50000
PART 0
AFIX   0
C38   1    0.338261    0.140500    0.021257    11.00000    0.03116    0.03695 =
         0.03532   -0.00323   -0.00388   -0.00028
PART 1
C46   1    0.297163    0.113198    0.241400    10.50000    0.06601    0.02986 =
         0.01939    0.00303    0.00458    0.00250
AFIX  13
H46   2    0.294078    0.093756    0.282994    10.50000   -1.20000
AFIX   0
C47   1    0.113315    0.134054    0.241367    10.50000    0.10837    0.09434 =
         0.04892   -0.00008    0.01510    0.03760
AFIX 137
H47A  2    0.081555    0.140859    0.292874    10.50000   -1.50000
H47B  2    0.016605    0.117101    0.219912    10.50000   -1.50000
H47C  2    0.121964    0.157793    0.211292    10.50000   -1.50000
AFIX   0
C48   1    0.446777    0.141406    0.260959    10.50000    0.11802    0.04703 =
         0.03328    0.00176   -0.00847   -0.00822
AFIX 137
H48A  2    0.461653    0.159809    0.219603    10.50000   -1.50000
H48B  2    0.563909    0.127421    0.269800    10.50000   -1.50000
H48C  2    0.413475    0.155598    0.306378    10.50000   -1.50000
PART 2
AFIX   0
C46'  1    0.129353    0.097420    0.200364    10.50000    0.10955    0.08579 =
         0.09927   -0.00034    0.03930   -0.00983
AFIX  13
H46'  2    0.028407    0.085371    0.168854    10.50000   -1.20000
AFIX   0
C47'  1    0.078804    0.139144    0.208015    10.50000    0.08312    0.08327 =
         0.12766   -0.03502    0.04915    0.00383
AFIX 137
H47D  2    0.163761    0.151636    0.244188    10.50000   -1.50000
H47E  2   -0.049151    0.141260    0.225610    10.50000   -1.50000
H47F  2    0.088499    0.152025    0.159288    10.50000   -1.50000
AFIX   0
C48'  1    0.111194    0.079957    0.277891    10.50000    0.15752    0.15375 =
         0.10667    0.01287    0.05777   -0.03380
AFIX 137
H48D  2    0.214600    0.088881    0.310026    10.50000   -1.50000
H48E  2    0.114183    0.051538    0.274317    10.50000   -1.50000
H48F  2   -0.006932    0.088170    0.299419    10.50000   -1.50000
PART 0
AFIX   0
HKLF 4 1 1 0 0 0 1 0 0 0 1

REM  CyclophenylAu_201215_0m in P2(1)/c
REM R1 =  0.0746 for    5844 Fo > 4sig(Fo)  and  0.0977 for all    7780 data
REM    675 parameters refined using    445 restraints

END

WGHT      0.1273      4.3401

REM Highest difference peak  0.409,  deepest hole -0.434,  1-sigma level  0.065
Q1    1   0.8560  0.0996  0.6125  11.00000  0.05    0.41
Q2    1   0.5429  0.0812  0.1540  11.00000  0.05    0.38
Q3    1   0.5727  0.1021  0.5436  11.00000  0.05    0.36
Q4    1   1.0021  0.0985  0.5401  11.00000  0.05    0.36
Q5    1   0.5872  0.0905  0.4825  11.00000  0.05    0.35
Q6    1   0.8584  0.0434  0.6327  11.00000  0.05    0.35
Q7    1   0.8530  0.0472  0.5807  11.00000  0.05    0.35
Q8    1   0.2881  0.1017  0.2443  11.00000  0.05    0.33
Q9    1   0.6381  0.0870  0.4217  11.00000  0.05    0.32
Q10   1   1.0917  0.1029  0.5311  11.00000  0.05    0.31
;
_shelx_res_checksum   77715

_shelx_hkl_file
;
  -1   0   0   -0.90    0.08
  -1   0   0   -0.69    0.14
   2   0   0  805.73   47.67
  -2   0   0  759.32   49.01
  -2   0   0  815.88   60.73
   3   0   0    2.42    0.28
  -3   0   0    2.41    0.31
  -3   0   0    2.06    0.45
  -3   0   0    2.42    0.19
   4   0   0  260.64   16.22
  -4   0   0  275.31   15.49
  -4   0   0  279.70   16.72
  -4   0   0  259.51   20.77
   5   0   0    0.83    0.26
  -5   0   0    0.50    0.48
  -5   0   0    0.80    0.31
  -5   0   0    0.90    0.13
  -6   0   0    4.80    0.92
   6   0   0    5.67    0.63
  -6   0   0    5.46    0.68
   7   0   0    0.70    0.30
  -7   0   0   -0.11    0.32
  -7   0   0   -0.11    0.51
  -8   0   0    6.00    1.17
   8   0   0    5.91    0.76
  -8   0   0    7.93    0.89
   9   0   0    0.09    0.38
  -9   0   0    0.48    0.43
  -9   0   0    0.58    0.64
  -1  -1   0   -0.74    0.11
  -1  -1   0   -0.75    0.03
   1  -1   0   -0.63    0.06
  -1  -1   0   -0.63    0.07
  -1   1   0   -0.75    0.07
  -1   1   0   -0.64    0.13
  -2  -1   0  664.65   43.57
  -2  -1   0  708.60   54.04
  -2  -1   0  722.10   42.38
   2  -1   0  715.21   42.41
  -2   1   0  719.07   54.05
  -2   1   0  743.61   40.65
  -2   1   0  670.57   43.58
  -3  -1   0    0.73    0.21
   3  -1   0    0.66    0.17
  -3  -1   0    0.59    0.31
  -3   1   0    0.72    0.34
  -3   1   0    0.61    0.21
  -3   1   0    0.48    0.08
   3   1   0    0.53    0.15
   4  -1   0  149.81    9.61
  -4  -1   0  164.30    9.14
  -4  -1   0  147.33   12.33
  -4  -1   0  168.66    9.92
  -4   1   0  161.71   12.36
  -4   1   0  172.09    9.14
   4   1   0  143.31    9.60
  -5  -1   0    0.04    0.41
  -5  -1   0   -0.18    0.10
  -5  -1   0   -0.18    0.24
  -5   1   0    0.60    0.30
  -5   1   0   -0.12    0.09
  -5   1   0    0.65    0.50
  -6  -1   0    5.31    0.93
   6  -1   0    4.44    0.54
  -6  -1   0    3.03    0.57
   6   1   0    4.39    0.55
  -6   1   0    5.25    0.92
  -7  -1   0    2.95    0.76
   7  -1   0    2.98    0.46
   7   1   0    2.06    0.41
  -7   1   0    1.59    0.69
  -7   1   0    0.29    0.37
   8  -1   0    1.32    0.43
  -8  -1   0    2.35    0.53
  -8  -1   0    2.37    0.74
   8   1   0    0.70    0.39
  -8   1   0    1.54    0.50
  -8   1   0    0.86    0.63
  -9  -1   0    0.23    0.41
   9  -1   0    0.50    0.40
  -9  -1   0    0.04    0.67
  -9   1   0    0.60    0.75
   9   1   0    0.21    0.40
  -9   1   0   -0.29    0.39
  -1  -2   0   -0.19    0.03
  -1  -2   0   -0.17    0.11
  -1  -2   0   -0.15    0.03
   1  -2   0   -0.13    0.06
  -1   2   0   -0.16    0.12
  -1   2   0   -0.07    0.08
  -2  -2   0  532.67   35.20
  -2  -2   0  581.09   34.20
   2  -2   0  588.77   34.21
  -2  -2   0  559.35   43.65
  -2   2   0  560.46   43.67
  -2   2   0  617.31   32.83
  -2   2   0  550.29   35.21
  -3  -2   0   -0.12    0.07
   3  -2   0    0.02    0.14
  -3  -2   0    0.13    0.17
  -3  -2   0   -0.01    0.29
  -3   2   0   -0.30    0.15
  -3   2   0    0.36    0.33
  -3   2   0   -0.01    0.05
   4  -2   0  135.74    8.49
  -4  -2   0  131.26   10.90
  -4  -2   0  134.96    8.74
  -4   2   0  160.82    8.79
  -4   2   0  143.03   10.93
   4   2   0  129.81    8.48
  -4   2   0  142.13    8.05
  -5  -2   0    0.06    0.11
  -5  -2   0    0.17    0.24
  -5  -2   0    0.24    0.43
  -5   2   0    0.23    0.26
  -5   2   0    0.18    0.08
  -5   2   0    0.20    0.47
  -6  -2   0    4.52    0.88
   6  -2   0    4.40    0.56
  -6  -2   0    3.82    0.58
  -6   2   0    3.82    0.60
   6   2   0    3.92    0.54
  -6   2   0    4.04    0.86
   7  -2   0   -0.01    0.29
  -7  -2   0    0.01    0.54
  -7  -2   0    0.70    0.36
  -7   2   0    0.15    0.51
  -7   2   0   -0.03    0.31
   7   2   0    0.39    0.30
   8  -2   0    0.91    0.41
  -8  -2   0    0.40    0.59
  -8  -2   0    0.04    0.39
   8   2   0    0.64    0.37
  -8   2   0    0.85    0.68
  -8   2   0    1.39    0.47
   9  -2   0   -0.28    0.34
  -9  -2   0    0.29    0.43
  -9  -2   0    0.03    0.70
  -9   2   0    0.38    0.47
  -9   2   0    0.24    0.64
  -1  -3   0    2.84    0.18
  -1  -3   0    2.60    0.18
   1  -3   0    2.38    0.22
  -1   3   0    2.45    0.34
  -1   3   0    2.45    0.23
   2  -3   0    4.34    0.41
  -2  -3   0    4.32    0.40
  -2  -3   0    4.55    0.33
  -2   3   0    5.16    0.59
  -2   3   0    4.71    0.43
  -3  -3   0    0.04    0.07
  -3  -3   0    0.17    0.17
  -3  -3   0    0.22    0.09
  -3  -3   0    0.09    0.26
   3  -3   0    0.22    0.14
  -3   3   0    0.03    0.28
  -3   3   0    0.19    0.20
  -3   3   0    0.14    0.05
  -4  -3   0   50.29    2.60
  -4  -3   0   37.79    3.64
  -4   3   0   42.31    2.92
  -5  -3   0    0.80    0.47
   5  -3   0    0.66    0.25
  -5  -3   0    0.65    0.26
   5   3   0    0.85    0.25
  -5   3   0   -0.21    0.40
  -5   3   0    0.73    0.30
  -6  -3   0   16.31    1.29
  -6  -3   0   16.89    1.73
   6  -3   0   15.39    1.25
   6   3   0   15.48    1.24
  -6   3   0   17.00    1.73
  -6   3   0   17.78    1.35
   7  -3   0    0.09    0.30
  -7  -3   0   -0.34    0.29
  -7  -3   0   -0.97    0.46
   7   3   0    0.01    0.29
  -7   3   0    0.09    0.34
  -7   3   0    0.46    0.58
  -8  -3   0   11.39    1.04
   8  -3   0    9.22    0.98
  -8  -3   0    9.78    1.36
   8   3   0   11.98    1.00
  -8   3   0   10.08    1.40
  -8   3   0   11.17    1.07
  -9  -3   0    0.54    0.44
   9  -3   0   -0.51    0.32
  -9  -3   0   -0.28    0.65
  -9   3   0    0.18    0.67
  -9   3   0    0.08    0.44
   0  -4   0  163.43    8.93
   0  -4   0  149.50    9.29
   0   4   0  149.39    9.56
   1  -4   0    0.04    0.08
  -1  -4   0    0.10    0.04
  -1  -4   0    0.14    0.07
  -1  -4   0    0.17    0.05
  -1   4   0    0.17    0.10
  -1   4   0    0.01    0.15
  -2  -4   0  172.37   10.60
   2  -4   0  178.47   10.65
  -2  -4   0  191.47   10.19
  -2  -4   0  182.83   13.60
  -2  -4   0  168.41   10.94
  -2   4   0  174.05   10.97
  -2   4   0  168.64   13.62
  -3  -4   0    0.23    0.08
  -3  -4   0    0.16    0.08
  -3  -4   0    0.00    0.16
  -3  -4   0    0.17    0.27
   3  -4   0    0.32    0.16
  -3   4   0    0.30    0.31
  -3   4   0    0.15    0.18
  -3   4   0    0.23    0.04
  -4  -4   0  266.05   16.49
  -4  -4   0  273.42   15.30
  -4  -4   0  271.51   15.95
  -4  -4   0  257.21   20.50
   4  -4   0  273.26   16.03
  -4   4   0  265.31   16.52
  -4   4   0  260.26   15.27
  -4   4   0  255.35   20.52
   5  -4   0    0.55    0.23
  -5  -4   0    0.61    0.27
  -5  -4   0   -0.21    0.39
  -5   4   0   -0.44    0.39
   5   4   0    0.48    0.21
  -5   4   0    0.40    0.29
  -6  -4   0   49.76    3.53
   6  -4   0   54.72    3.44
  -6  -4   0   56.13    4.53
   6   4   0   56.96    3.45
  -6   4   0   53.34    4.53
  -6   4   0   51.86    3.59
   7  -4   0    0.21    0.30
  -7  -4   0   -0.17    0.30
  -7  -4   0    0.30    0.50
  -7   4   0    0.38    0.39
   7   4   0    0.18    0.29
  -7   4   0   -0.14    0.51
  -8  -4   0    3.96    0.91
   8  -4   0    3.13    0.53
  -8  -4   0    3.28    0.58
   8   4   0    1.67    0.46
  -8   4   0    2.60    0.61
  -8   4   0    2.41    0.83
  -9  -4   0    0.58    0.66
   9  -4   0    0.05    0.35
  -9  -4   0    0.02    0.39
  -9   4   0    0.42    0.45
  -9   4   0    1.23    0.73
   0  -5   0   -0.11    0.03
   0  -5   0   -0.11    0.03
   0  -5   0   -0.04    0.09
   0   5   0   -0.10    0.05
  -1  -5   0    1.96    0.18
  -1  -5   0    2.01    0.16
   1  -5   0    2.08    0.19
  -1   5   0    1.84    0.21
   1   5   0    1.62    0.21
  -1   5   0    2.31    0.32
  -2  -5   0  362.41   21.26
  -2  -5   0  351.72   27.19
  -2  -5   0  358.07   20.42
   2  -5   0  355.11   21.30
  -2  -5   0  349.74   21.91
  -2   5   0  358.07   21.94
  -2   5   0  347.96   27.21
  -3  -5   0    0.67    0.11
  -3  -5   0    0.71    0.31
  -3  -5   0    0.68    0.20
   3  -5   0    0.58    0.18
  -3  -5   0    0.73    0.11
  -3   5   0    0.56    0.22
  -3   5   0    0.71    0.35
  -4  -5   0   58.27    3.98
  -4  -5   0   60.06    3.64
  -4  -5   0   57.65    5.01
   4  -5   0   63.50    3.89
  -4   5   0   75.25    5.12
   5  -5   0    2.14    0.34
  -5  -5   0    1.97    0.35
  -5  -5   0    1.60    0.54
   5  -5   0    1.38    0.14
  -5  -5   0    1.95    0.20
  -5   5   0    1.33    0.39
  -5   5   0    1.43    0.58
   7  -5   0    5.17    0.58
  -7  -5   0    3.76    0.86
  -7   5   0    2.69    0.86
  -8  -5   0    8.40    0.92
   8  -5   0    8.08    0.91
  -8  -5   0    7.78    1.38
  -8   5   0   10.06    1.49
  -8   5   0    9.88    1.01
   8   5   0   10.50    0.95
  -9  -5   0   -0.69    0.36
   9  -5   0    0.17    0.36
  -9  -5   0    1.11    0.66
  -9   5   0   -0.15    0.44
  -9   5   0    0.97    0.71
   0  -6   0  778.94   42.12
   0  -6   0  705.82   43.85
   0   6   0  708.58   45.20
  -1  -6   0    0.96    0.10
  -1  -6   0    1.11    0.11
   1  -6   0    1.14    0.15
  -1   6   0    0.95    0.17
   1   6   0    1.07    0.16
  -1   6   0    1.02    0.28
  -1   6   0    0.93    0.09
   2  -6   0   18.20    1.15
  -2  -6   0   17.05    1.10
  -2  -6   0   17.69    1.16
  -2   6   0   17.94    1.52
  -2   6   0   17.99    1.20
   3  -6   0    2.58    0.30
  -3  -6   0    2.43    0.24
  -3  -6   0    2.08    0.30
  -3  -6   0    2.79    0.47
  -3  -6   0    2.76    0.24
  -3   6   0    2.19    0.34
  -3   6   0    2.24    0.49
  -4  -6   0   11.88    0.87
  -4  -6   0    9.41    1.14
   4  -6   0   12.04    0.88
  -4  -6   0   11.21    0.73
  -4   6   0   11.35    1.23
  -5  -6   0    1.85    0.34
  -5  -6   0    1.35    0.19
  -5  -6   0    1.62    0.55
  -5   6   0    1.43    0.37
  -5   6   0    1.34    0.55
  -6  -6   0   25.47    1.46
  -6  -6   0   23.53    1.70
  -6  -6   0   23.27    2.23
   6  -6   0   21.68    1.66
  -6   6   0   24.30    1.79
  -6   6   0   22.12    2.29
   6   6   0   24.05    1.68
   7  -6   0    0.94    0.32
  -7  -6   0   -0.10    0.29
  -7  -6   0    0.03    0.54
  -7   6   0   -0.99    0.45
   7   6   0    0.51    0.33
  -7   6   0    0.08    0.38
  -8  -6   0   11.12    1.49
   8  -6   0   13.64    1.11
  -8  -6   0   11.74    1.13
  -8   6   0   11.71    1.55
   8   6   0   13.15    1.12
  -8   6   0   13.39    1.22
   9  -6   0    0.66    0.39
  -9  -6   0    0.32    0.73
  -9   6   0    0.87    0.72
  -9   6   0   -0.35    0.42
   0  -7   0   -0.03    0.17
   0  -7   0    0.13    0.06
   0  -7   0    0.12    0.05
   0   7   0    0.21    0.10
  -1  -7   0    0.85    0.10
  -1  -7   0    0.69    0.10
   1  -7   0    0.75    0.13
  -1  -7   0    1.19    0.20
   1   7   0    0.59    0.15
  -1   7   0    0.62    0.24
  -1   7   0    0.80    0.16
  -2  -7   0  295.44   18.14
   2  -7   0  295.69   18.18
  -2  -7   0  309.64   17.43
  -2  -7   0  311.42   18.69
  -2   7   0  292.55   23.23
  -2   7   0  309.88   18.73
  -3  -7   0    0.08    0.08
  -3  -7   0    0.03    0.08
  -3  -7   0    0.15    0.26
   3  -7   0   -0.16    0.13
  -3  -7   0   -0.16    0.14
  -3   7   0   -0.14    0.31
  -3   7   0   -0.02    0.20
  -4  -7   0   12.18    0.89
   4  -7   0   11.19    0.89
  -4  -7   0   14.22    0.80
  -4  -7   0   10.32    0.75
  -4  -7   0   10.87    1.20
  -4   7   0   10.34    1.24
  -4   7   0   12.68    0.98
  -5  -7   0    0.05    0.22
  -5  -7   0   -0.15    0.11
   5  -7   0   -0.20    0.20
  -5  -7   0   -0.12    0.38
  -5   7   0   -0.22    0.36
  -5   7   0    0.15    0.27
  -6  -7   0   48.31    2.98
   6  -7   0   56.17    3.26
  -6  -7   0   48.93    4.23
  -6   7   0   48.59    4.29
  -7  -7   0    0.45    0.56
   7  -7   0    1.48    0.36
  -7  -7   0    0.24    0.31
  -7   7   0    0.72    0.41
   7   7   0    0.47    0.16
   7   7   0    0.23    0.32
  -7   7   0    0.28    0.53
  -8  -7   0    0.52    0.42
  -8   7   0    2.34    0.85
  -8   7   0    0.33    0.44
   9  -7   0    0.24    0.36
  -9  -7   0    1.38    0.70
  -9   7   0    0.40    0.46
   0  -8   0  469.29   29.11
   0  -8   0  498.41   27.95
   1  -8   0    2.56    0.25
  -1  -8   0    2.74    0.20
  -1  -8   0    2.76    0.22
  -1  -8   0    2.49    0.30
   1  -8   0    2.54    0.18
  -1   8   0    2.77    0.27
  -1   8   0    2.82    0.37
   1   8   0    2.50    0.26
   2  -8   0    7.26    0.58
  -2  -8   0    9.97    0.53
  -2  -8   0    8.74    0.53
   2   8   0    6.20    0.60
  -2   8   0    7.03    0.81
   3  -8   0    0.45    0.17
  -3  -8   0    0.54    0.11
  -3  -8   0    0.46    0.29
  -3  -8   0    0.44    0.17
  -3  -8   0    0.51    0.12
  -3   8   0    0.68    0.24
  -3   8   0    0.76    0.36
  -4  -8   0    4.08    0.41
   4  -8   0    3.52    0.41
  -4  -8   0    2.69    0.29
  -4  -8   0    3.04    0.61
  -4   8   0    3.07    0.44
  -4   8   0    3.18    0.66
  -5  -8   0    0.59    0.26
   5  -8   0    0.59    0.25
  -5  -8   0    0.22    0.13
  -5  -8   0    0.28    0.44
  -5   8   0    0.27    0.43
  -5   8   0    0.68    0.30
   7  -8   0    1.36    0.35
  -7  -8   0    0.18    0.31
  -7  -8   0    0.29    0.49
  -7   8   0   -0.04    0.55
   7   8   0    1.17    0.38
  -7   8   0   -0.06    0.34
  -8  -8   0    3.05    0.92
  -8  -8   0    3.92    0.61
   8  -8   0    3.96    0.59
  -8   8   0    3.68    0.99
  -8   8   0    3.94    0.72
   8   8   0    4.27    0.66
   9  -8   0    0.05    0.34
  -9   8   0   -0.51    0.42
   0  -9   0    0.01    0.18
   0   9   0    0.26    0.12
  -1  -9   0    4.83    0.34
   1  -9   0    4.81    0.31
  -1  -9   0    5.46    0.35
  -1  -9   0    5.07    0.45
   1  -9   0    5.05    0.37
  -1   9   0    5.02    0.51
  -1   9   0    4.70    0.40
   1   9   0    5.21    0.39
   2  -9   0   49.28    2.94
  -2  -9   0   50.69    2.80
  -2  -9   0   48.98    2.90
  -2   9   0   46.48    3.80
  -2   9   0   48.44    3.05
   2   9   0   42.42    3.04
  -3  -9   0    2.91    0.27
  -3  -9   0    3.01    0.26
  -3  -9   0    3.09    0.33
  -3  -9   0    3.49    0.50
   3  -9   0    2.88    0.33
  -3   9   0    2.87    0.55
  -3   9   0    3.15    0.39
  -4  -9   0    0.24    0.11
  -4  -9   0   -0.03    0.10
  -4  -9   0   -0.05    0.17
   4  -9   0   -0.22    0.16
  -4  -9   0    0.23    0.33
  -4   9   0   -0.27    0.23
  -4   9   0   -0.10    0.39
  -5  -9   0    0.17    0.38
  -5  -9   0   -0.09    0.11
   5  -9   0    0.12    0.21
  -5  -9   0    0.26    0.13
  -5  -9   0    0.32    0.23
  -5   9   0    0.23    0.44
  -5   9   0   -0.06    0.25
  -6  -9   0   12.77    1.38
  -6  -9   0   10.83    0.81
  -6   9   0   11.82    1.42
   7  -9   0    0.95    0.32
  -7  -9   0    0.02    0.27
  -7  -9   0    0.03    0.51
  -7   9   0   -0.32    0.32
   7   9   0    0.13    0.31
  -7   9   0    0.56    0.56
  -8  -9   0    2.81    0.54
  -8  -9   0    4.70    0.98
  -8   9   0    2.59    0.65
  -8   9   0    4.34    1.04
   9  -9   0   -0.09    0.32
  -9   9   0   -0.04    0.45
   0 -10   0   95.28    5.93
   0 -10   0  104.17    5.70
   0  10   0   96.28    6.13
   1 -10   0    0.05    0.04
  -1 -10   0    0.05    0.07
  -1 -10   0    0.11    0.10
   1 -10   0    0.04    0.07
  -1 -10   0    0.07    0.05
  -1  10   0    0.01    0.10
   1  10   0    0.06    0.09
  -1  10   0    0.08    0.16
  -2 -10   0    0.73    0.11
   2 -10   0    0.22    0.12
  -2 -10   0    0.20    0.07
  -2 -10   0    0.16    0.19
  -2  10   0    0.43    0.28
   2  10   0   -0.09    0.14
  -3 -10   0   -0.03    0.07
   3 -10   0   -0.16    0.12
  -3 -10   0    0.04    0.09
  -3  10   0   -0.42    0.26
  -3  10   0    0.15    0.19
   4 -10   0    1.21    0.26
  -4 -10   0    1.36    0.43
  -4 -10   0    1.21    0.18
  -4 -10   0    1.77    0.28
  -4  10   0    1.35    0.32
  -4  10   0    1.16    0.48
  -5 -10   0    0.84    0.16
  -5 -10   0    0.91    0.48
  -5 -10   0    0.91    0.27
   5 -10   0    0.63    0.25
  -5 -10   0    0.78    0.17
  -5  10   0    0.56    0.50
  -5  10   0    0.71    0.33
  -6 -10   0    8.86    0.63
  -6 -10   0    8.70    1.09
   6 -10   0   10.74    0.82
  -6 -10   0    6.70    0.75
  -6 -10   0    8.41    0.64
  -6  10   0    7.47    0.90
  -6  10   0    9.54    1.21
  -7 -10   0    0.94    0.56
  -7 -10   0    0.28    0.29
   7 -10   0    0.19    0.28
  -7  10   0   -0.57    0.50
   7  10   0   -0.09    0.29
  -7  10   0   -0.13    0.32
  -8 -10   0    3.52    0.87
  -8 -10   0    1.62    0.45
  -8  10   0    2.60    0.63
   8  10   0    2.80    0.56
  -8  10   0    1.01    0.74
   9 -10   0   -0.05    0.33
  -9  10   0    0.44    0.48
   0 -11   0    0.15    0.15
   0 -11   0    0.16    0.06
   0 -11   0    0.04    0.06
   0  11   0    0.08    0.10
  -1 -11   0    0.26    0.08
  -1 -11   0    0.59    0.11
   1 -11   0    0.28    0.08
  -1 -11   0    0.33    0.07
   1 -11   0    0.31    0.06
  -1  11   0    0.28    0.13
  -1  11   0    0.59    0.19
   1  11   0    0.42    0.11
  -2 -11   0    0.10    0.19
  -2 -11   0    0.44    0.11
   2 -11   0    0.38    0.13
  -2 -11   0    0.33    0.08
  -2  11   0    0.49    0.05
   2  11   0    0.29    0.16
  -2  11   0    0.38    0.28
  -2  11   0    0.29    0.17
  -3 -11   0    2.86    0.27
   3 -11   0    2.95    0.33
  -3 -11   0    2.78    0.26
  -3  11   0    3.87    0.59
   3  11   0    2.40    0.36
  -3  11   0    3.05    0.38
  -4 -11   0    4.54    0.43
  -4 -11   0    3.53    0.61
   4 -11   0    2.87    0.39
  -4 -11   0    4.58    0.34
  -4  11   0    3.35    0.71
  -4  11   0    2.49    0.44
  -5 -11   0    3.60    0.35
  -5 -11   0    4.63    0.37
  -5 -11   0    4.27    0.75
  -5 -11   0    3.93    0.47
   5 -11   0    3.09    0.44
  -5  11   0    3.94    0.57
  -5  11   0    4.62    0.84
  -6 -11   0    0.85    0.20
  -6 -11   0    1.72    0.60
  -6 -11   0    0.28    0.29
   6 -11   0    1.63    0.35
  -6  11   0    0.56    0.40
  -6  11   0    1.41    0.65
  -7 -11   0    2.01    0.64
   7 -11   0    1.96    0.39
  -7  11   0    2.00    0.71
  -7  11   0    0.30    0.39
   7  11   0    2.12    0.43
  -8 -11   0    8.67    0.88
   8 -11   0   10.27    0.90
  -8 -11   0    9.99    1.42
  -8  11   0    8.13    1.05
   8  11   0    9.09    0.95
  -8  11   0    7.87    1.40
   9 -11   0   -0.04    0.34
  -9  11   0   -0.39    0.44
   0 -12   0    2.37    0.20
   0 -12   0    2.35    0.19
   0  12   0    2.15    0.24
  -1 -12   0    1.09    0.13
   1 -12   0    0.86    0.12
  -1 -12   0    0.84    0.11
   1 -12   0    0.80    0.09
  -1 -12   0    0.66    0.10
  -1  12   0    0.95    0.23
  -1  12   0    0.74    0.16
   1  12   0    0.85    0.14
  -2 -12   0    3.17    0.39
   2 -12   0    3.04    0.31
  -2 -12   0    3.03    0.25
  -2 -12   0    3.44    0.28
  -2  12   0    2.71    0.20
  -2  12   0    3.16    0.36
   2  12   0    2.78    0.32
  -2  12   0    3.13    0.49
   3 -12   0   -0.04    0.13
  -3 -12   0    0.04    0.07
  -3 -12   0    0.10    0.09
  -3  12   0    0.09    0.20
  -3  12   0   -0.11    0.29
   3  12   0   -0.31    0.17
  -4 -12   0   15.18    1.39
  -4 -12   0   14.47    0.94
  -4 -12   0   15.20    0.97
   4 -12   0   15.34    1.06
  -4  12   0   14.90    1.47
  -4  12   0   13.48    1.12
  -5 -12   0    0.17    0.14
  -5 -12   0    0.22    0.22
  -5 -12   0    0.34    0.42
   5 -12   0    0.22    0.22
  -5 -12   0    0.74    0.15
  -5  12   0    0.13    0.28
  -5  12   0    0.07    0.41
  -6 -12   0   16.92    1.63
  -6 -12   0   15.36    1.07
   6 -12   0   15.42    1.19
  -6 -12   0   17.01    1.04
  -6 -12   0   15.63    1.21
  -6  12   0   14.92    1.69
  -6  12   0   14.67    1.30
  -7 -12   0    0.06    0.30
  -7 -12   0    0.42    0.18
  -7 -12   0    0.66    0.49
   7 -12   0    0.77    0.32
  -7  12   0    0.30    0.51
  -7  12   0    0.97    0.44
  -8 -12   0    2.28    0.51
  -8 -12   0    2.53    0.85
   8 -12   0    4.16    0.57
  -8  12   0    2.07    0.62
   8  12   0    2.97    0.57
  -8  12   0    2.51    0.85
   9 -12   0   -0.47    0.96
   9 -12   0    0.71    0.37
  -9  12   0   -0.30    0.45
   0 -13   0   -0.01    0.14
   0 -13   0   -0.13    0.05
   0 -13   0   -0.01    0.06
   0  13   0   -0.08    0.11
  -1 -13   0    3.87    0.28
  -1 -13   0    3.99    0.29
   1 -13   0    3.87    0.30
   1 -13   0    3.49    0.26
  -1  13   0    3.23    0.43
  -1  13   0    4.02    0.37
   1  13   0    4.29    0.35
  -2 -13   0   34.89    2.06
  -2 -13   0   34.30    2.13
   2 -13   0   36.45    2.17
  -2 -13   0   35.41    2.75
  -2  13   0   34.89    2.83
   2  13   0   36.21    2.25
  -2  13   0   34.23    2.27
  -2  13   0   32.97    2.02
  -3 -13   0    0.25    0.09
   3 -13   0    0.09    0.14
  -3 -13   0    0.28    0.11
  -3  13   0    0.19    0.21
  -3  13   0    0.28    0.32
   3  13   0    0.14    0.20
   4 -13   0    1.23    0.25
  -4 -13   0    1.24    0.41
  -4  13   0    0.95    0.30
  -4  13   0    1.26    0.48
   5 -13   0   -0.20    0.19
  -5 -13   0    0.09    0.13
  -5 -13   0    0.22    0.13
  -5 -13   0    0.06    0.37
  -5 -13   0    0.32    0.23
  -5  13   0   -0.47    0.44
  -5  13   0   -0.19    0.28
  -6 -13   0   11.32    0.71
  -6 -13   0    8.86    0.70
  -6 -13   0   10.57    1.17
   6 -13   0   11.01    0.86
  -6 -13   0    7.57    0.82
  -6  13   0    9.54    0.93
  -6  13   0    7.73    1.27
  -7 -13   0   -0.43    0.44
  -7 -13   0   -0.22    0.26
  -7 -13   0    0.26    0.17
   7 -13   0    0.28    0.28
  -7  13   0   -0.25    0.33
  -7  13   0   -0.72    0.45
  -8 -13   0    1.45    0.46
  -8 -13   0    2.16    0.74
   8 -13   0    2.79    0.47
  -8  13   0    1.53    0.75
   8  13   0    1.82    0.50
  -8  13   0    2.31    0.60
   9 -13   0    0.03    0.30
   9 -13   0    0.09    1.13
  -9  13   0    0.13    0.48
   9  13   0    1.93    1.11
   0 -14   0   10.86    0.74
   0 -14   0   12.15    0.71
   0  14   0   11.52    0.81
   1 -14   0    3.42    0.31
  -1 -14   0    4.03    0.29
  -1 -14   0    3.87    0.31
   1 -14   0    3.56    0.27
   1  14   0    4.49    0.35
  -1  14   0    4.25    0.39
   2 -14   0   17.09    1.13
  -2 -14   0   18.13    1.43
  -2 -14   0   17.70    1.10
  -2 -14   0   18.23    1.07
  -2  14   0   18.47    1.21
   2  14   0   17.16    1.17
  -2  14   0   15.88    1.02
  -2  14   0   17.83    1.52
  -3 -14   0    4.18    0.51
   3 -14   0    3.13    0.34
  -3 -14   0    3.60    0.30
  -3 -14   0    2.95    0.28
  -3  14   0    3.10    0.40
   3  14   0    3.43    0.41
  -3  14   0    2.78    0.58
  -4 -14   0   31.18    1.79
   4 -14   0   28.99    1.91
  -4 -14   0   29.71    1.84
  -4  14   0   30.30    2.03
  -4  14   0   30.55    2.59
   4  14   0   25.75    2.00
   5 -14   0    0.41    0.22
  -5 -14   0    0.13    0.15
  -5 -14   0    0.06    0.37
  -5  14   0    0.02    0.29
   5  14   0   -0.37    0.26
  -5  14   0    0.68    0.51
  -6 -14   0    0.61    0.48
  -6 -14   0    0.49    0.18
  -6 -14   0    0.18    0.16
   6 -14   0    0.47    0.27
  -6  14   0    0.63    0.55
  -6  14   0   -0.34    0.31
  -7 -14   0    0.68    0.50
   7 -14   0    1.08    0.33
  -7 -14   0    0.71    0.33
  -7 -14   0    0.64    0.20
  -7  14   0    0.75    0.44
  -7  14   0    0.45    0.60
  -8 -14   0    0.60    0.61
   8 -14   0    0.88    0.35
  -8  14   0    0.66    0.69
   8  14   0   -0.07    0.35
  -8  14   0   -0.49    0.36
   9 -14   0    1.57    1.21
   9  14   0    2.81    1.13
  -9  14   0    0.44    0.48
  -1 -15   0   11.59    0.78
   1 -15   0   11.46    0.75
   1 -15   0   11.61    0.80
  -1 -15   0   13.72    0.80
  -1  15   0   13.66    0.88
   1  15   0   12.48    0.86
  -2 -15   0   29.47    1.82
  -2 -15   0   31.25    2.34
  -2 -15   0   30.58    1.77
   2 -15   0   28.30    1.85
  -2  15   0   27.30    1.72
   2  15   0   31.42    1.92
  -2  15   0   29.58    1.95
  -2  15   0   29.07    2.43
  -3 -15   0    0.17    0.11
   3 -15   0    0.21    0.14
  -3 -15   0    0.14    0.23
  -3 -15   0    0.02    0.08
   3  15   0    0.18    0.18
  -3  15   0    0.03    0.30
  -3  15   0    0.13    0.21
  -4 -15   0   17.84    1.17
  -4 -15   0   19.40    1.15
   4 -15   0   18.69    1.25
  -4  15   0   18.14    1.35
  -4  15   0   18.12    1.75
   4  15   0   16.80    1.31
  -5 -15   0    0.75    0.45
  -5 -15   0    1.26    0.20
  -5 -15   0    0.98    0.20
   5 -15   0    0.98    0.27
   5  15   0    1.31    0.38
  -5  15   0    1.19    0.37
  -5  15   0    1.60    0.59
   6 -15   0    0.03    0.22
  -6 -15   0   -0.08    0.14
  -6 -15   0    0.10    0.43
  -6 -15   0    0.17    0.16
   6  15   0   -0.13    0.32
  -6  15   0   -0.31    0.27
  -6  15   0    0.03    0.47
  -7 -15   0   -0.14    0.46
   7 -15   0    0.20    0.27
  -7 -15   0    0.12    0.16
  -7  15   0    0.19    0.55
  -7  15   0   -0.07    0.38
  -8 -15   0    1.26    0.70
   8 -15   0    1.53    0.39
   8  15   0    1.66    0.48
  -8  15   0    1.03    0.52
   9 -15   0    0.66    0.36
   9 -15   0   -0.53    0.95
  -9  15   0    0.47    0.48
   0 -16   0  961.17   58.75
   0 -16   0 1000.00   56.35
   0  16   0  974.90   60.47
   1 -16   0    0.06    0.32
   1 -16   0    0.20    0.09
   1 -16   0    0.01    0.07
  -1 -16   0    0.19    0.09
  -1 -16   0    0.13    0.10
   1  16   0    0.07    0.15
  -1  16   0    0.21    0.17
  -2 -16   0   58.33    3.59
  -2 -16   0   59.37    4.58
  -2 -16   0   60.22    3.47
   2 -16   0   59.25    3.61
  -2  16   0   57.88    3.77
  -2  16   0   57.08    3.42
  -2  16   0   60.21    4.68
   2  16   0   60.40    3.73
  -3 -16   0    0.97    0.28
  -3 -16   0    0.97    0.14
  -3 -16   0    0.75    0.15
   3 -16   0    0.94    0.20
   3  16   0    0.87    0.23
  -3  16   0    0.75    0.37
  -3  16   0    0.90    0.24
  -4 -16   0    7.75    0.57
   4 -16   0    7.66    0.65
  -4 -16   0    7.76    0.57
   4  16   0    7.90    0.72
  -4  16   0    7.44    0.71
  -4  16   0    8.88    1.02
  -5 -16   0    0.12    0.13
  -5 -16   0   -0.08    0.13
   5 -16   0   -0.13    0.19
  -5  16   0    0.34    0.30
   5  16   0   -0.20    0.28
  -5  16   0    0.26    0.46
  -6 -16   0    0.49    0.20
   6 -16   0    0.86    0.28
  -6 -16   0    0.79    0.49
  -6 -16   0    0.26    0.15
  -6  16   0    1.25    0.41
   6  16   0    0.19    0.35
  -6  16   0    1.07    0.60
   7 -16   0    0.24    0.27
  -7 -16   0   -0.15    0.15
  -7 -16   0    0.28    0.50
  -7  16   0    0.74    0.62
  -7  16   0    0.17    0.35
   7  16   0   -0.36    0.32
   8 -16   0    0.81    0.35
  -8  16   0    1.45    0.53
   8  16   0    0.84    0.24
   9 -16   0    0.50    1.00
   9 -16   0    0.09    0.30
  -9  16   0   -0.28    0.41
  -1 -17   0    7.78    0.55
   1 -17   0    7.53    0.56
   1 -17   0    7.75    0.53
  -1 -17   0    9.70    0.57
   1 -17   0    5.74    0.86
  -1  17   0    8.53    0.64
   1  17   0    9.78    0.64
  -2 -17   0   32.40    2.08
  -2 -17   0   34.92    2.02
   2 -17   0   33.02    2.10
  -2 -17   0   34.06    2.64
   2  17   0   36.21    2.19
  -2  17   0   33.89    2.76
  -2  17   0   32.22    1.97
  -2  17   0   33.96    2.22
  -3 -17   0    3.11    0.45
  -3 -17   0    2.64    0.27
  -3 -17   0    2.64    0.28
   3 -17   0    3.38    0.34
  -3  17   0    3.13    0.42
   3  17   0    3.35    0.38
  -3  17   0    3.24    0.59
  -4 -17   0    4.23    0.39
  -4 -17   0    4.44    0.65
  -4 -17   0    3.70    0.36
   4 -17   0    4.16    0.44
   4  17   0    3.99    0.50
  -4  17   0    5.09    0.82
  -4  17   0    5.00    0.53
   5 -17   0    3.14    0.42
  -5 -17   0    2.86    0.33
  -5 -17   0    4.17    0.35
   5  17   0    3.69    0.54
  -5  17   0    3.26    0.76
  -5  17   0    2.84    0.53
   6 -17   0    0.55    0.25
  -6 -17   0    0.57    0.18
  -6 -17   0    0.20    0.18
  -6 -17   0    0.91    0.49
  -6  17   0   -0.20    0.34
   6  17   0   -0.12    0.34
  -6  17   0    0.02    0.54
   7 -17   0    1.65    0.36
  -7 -17   0    0.38    0.18
  -7 -17   0    0.38    0.58
   7  17   0   -0.01    0.36
  -7  17   0    0.18    0.63
  -7  17   0    0.25    0.36
  -8 -17   0    0.45    0.21
   8 -17   0    0.43    0.32
   8  17   0    0.61    0.21
  -8  17   0    0.13    0.40
   9 -17   0    0.34    0.33
  -9  17   0    0.23    0.48
   0 -18   0   29.85    1.73
   0 -18   0   28.10    1.80
   0  18   0   29.57    1.91
   1 -18   0    3.10    0.58
  -1 -18   0    3.42    0.32
   1 -18   0    3.39    0.31
  -1 -18   0    4.48    0.31
   1 -18   0    3.38    0.29
   1  18   0    4.36    0.39
  -1  18   0    4.62    0.41
  -2 -18   0   38.97    2.41
  -2 -18   0   39.64    3.06
   2 -18   0   39.75    2.44
  -2 -18   0   39.85    2.34
  -2  18   0   36.70    2.29
  -2  18   0   37.24    2.56
   2  18   0   43.30    2.53
   3 -18   0    1.91    0.26
  -3 -18   0    1.87    0.23
  -3 -18   0    2.68    0.38
  -3 -18   0    2.07    0.22
  -3  18   0    2.32    0.35
  -3  18   0    1.55    0.47
   3  18   0    2.11    0.31
   4 -18   0   13.00    0.94
  -4 -18   0   12.84    0.85
  -4 -18   0   13.34    0.86
  -4 -18   0   13.66    1.22
  -4  18   0   12.28    1.03
  -4  18   0   13.51    1.38
   4  18   0   11.49    0.99
  -5 -18   0   -0.10    0.15
   5 -18   0   -0.07    0.20
  -5 -18   0    0.07    0.13
  -5  18   0   -0.12    0.43
   5  18   0   -0.17    0.28
  -5  18   0   -0.07    0.29
  -6 -18   0    5.59    0.50
  -6 -18   0    5.41    0.46
  -6 -18   0    4.83    0.85
   6 -18   0    4.50    0.55
  -6  18   0    3.78    0.66
   6  18   0    4.39    0.66
  -6  18   0    6.02    1.02
   7 -18   0    0.82    0.31
  -7 -18   0    0.50    0.21
  -7  18   0   -0.22    0.60
  -7  18   0    0.27    0.38
   7  18   0    0.02    0.37
  -8 -18   0    0.01    0.18
   8 -18   0    0.60    1.01
   8 -18   0    0.04    0.30
   8  18   0    0.03    0.19
  -8  18   0    0.06    0.39
   0 -19   0    0.11    0.09
   0 -19   0    0.29    0.10
   0 -19   0    0.25    0.13
   0  19   0    0.29    0.19
   1 -19   0   -0.05    0.09
  -1 -19   0    0.07    0.10
   1 -19   0    0.21    0.08
  -1 -19   0    0.13    0.09
   1 -19   0    0.00    0.30
  -1  19   0    0.22    0.18
   1  19   0    0.03    0.17
  -2 -19   0    2.99    0.29
  -2 -19   0    2.53    0.25
   2 -19   0    2.62    0.28
  -2  19   0    2.63    0.36
  -2  19   0    2.36    0.22
   2  19   0    3.45    0.35
  -3 -19   0    0.30    0.11
  -3 -19   0    0.35    0.21
   3 -19   0    0.54    0.16
  -3 -19   0    0.06    0.12
  -3  19   0    0.28    0.34
  -3  19   0    0.03    0.21
   3  19   0    0.45    0.19
  -3  19   0    0.40    0.06
  -4 -19   0    0.50    0.14
  -4 -19   0    0.23    0.15
  -4 -19   0    0.14    0.33
   4 -19   0    0.45    0.20
  -4  19   0    0.82    0.47
   4  19   0    0.43    0.26
  -4  19   0    0.54    0.31
  -5 -19   0   -0.02    0.12
  -5 -19   0   -0.07    0.14
   5 -19   0   -0.07    0.19
  -5  19   0    0.31    0.47
   5  19   0    0.19    0.27
  -5  19   0   -0.53    0.24
  -6 -19   0    2.61    0.32
   6 -19   0    2.31    0.39
  -6 -19   0    1.97    0.29
   6  19   0    1.89    0.48
  -6  19   0    2.57    0.53
  -6  19   0    1.55    0.71
  -7 -19   0    0.21    0.18
   7 -19   0    0.52    0.29
  -7  19   0   -0.17    0.37
   7  19   0   -0.28    0.36
  -8 -19   0    0.78    0.25
   8 -19   0    1.62    1.25
   8 -19   0    0.58    0.32
  -8  19   0    0.50    0.49
   8  19   0    0.52    0.22
   0 -20   0    1.35    0.18
   0 -20   0    1.90    0.19
   0 -20   0    1.48    0.20
   0  20   0    2.01    0.28
  -1 -20   0    0.03    0.10
   1 -20   0    0.29    0.30
   1 -20   0   -0.02    0.08
  -1 -20   0    0.02    0.09
   1  20   0    0.22    0.18
  -1  20   0   -0.13    0.15
  -2 -20   0   23.66    1.47
  -2 -20   0   24.22    1.51
   2 -20   0   23.64    1.53
  -2  20   0   24.19    1.65
   2  20   0   26.03    1.61
  -2  20   0   23.19    1.42
  -3 -20   0    1.40    0.30
   3 -20   0    1.22    0.21
  -3 -20   0    1.06    0.19
  -3 -20   0    1.26    0.18
   3  20   0    1.04    0.24
  -3  20   0    1.12    0.29
  -3  20   0    1.30    0.11
  -3  20   0    1.31    0.43
  -4 -20   0   21.71    1.78
  -4 -20   0   19.46    1.29
  -4 -20   0   20.08    1.32
   4 -20   0   18.72    1.36
  -4  20   0   20.74    1.90
  -4  20   0   21.43    1.52
   4  20   0   22.06    1.45
  -5 -20   0    0.22    0.35
  -5 -20   0   -0.30    0.14
   5 -20   0    0.11    0.20
  -5  20   0   -0.26    0.25
  -5  20   0    0.37    0.45
   5  20   0    0.01    0.27
  -6 -20   0    2.69    0.33
   6 -20   0    2.86    0.42
  -6 -20   0    2.85    0.34
  -6  20   0    2.35    0.51
   6  20   0    2.70    0.51
  -6  20   0    3.06    0.77
   7 -20   0    1.22    0.33
  -7 -20   0    0.97    0.23
  -7  20   0    0.30    0.41
   8 -20   0    0.27    0.30
  -8 -20   0    0.15    0.21
   8 -20   0    2.52    1.21
  -8  20   0   -0.01    0.44
   8  20   0    0.04    0.18
   0 -21   0    0.27    0.10
   0 -21   0    0.26    0.10
   0  21   0    0.15    0.18
   1 -21   0    0.03    0.09
  -1 -21   0    0.03    0.09
   1 -21   0   -0.03    0.28
  -1 -21   0    0.02    0.09
   1  21   0    0.23    0.19
  -1  21   0   -0.03    0.16
  -2 -21   0    1.22    0.17
   2 -21   0    1.35    0.20
  -2 -21   0    1.54    0.20
   2  21   0    1.30    0.25
  -2  21   0    1.15    0.14
  -2  21   0    1.24    0.29
  -3 -21   0   -0.03    0.12
   3 -21   0    0.25    0.14
  -3 -21   0    0.32    0.12
  -3  21   0   -0.03    0.21
   3  21   0    0.38    0.19
  -3  21   0    0.22    0.06
  -4 -21   0    0.24    0.16
  -4 -21   0    0.08    0.12
  -4  21   0    0.03    0.27
  -4  21   0    0.40    0.41
   4  21   0   -0.09    0.21
  -5 -21   0    0.43    0.16
  -5 -21   0   -0.02    0.16
   5 -21   0    0.31    0.21
   5  21   0    0.23    0.28
  -5  21   0    0.59    0.34
  -5  21   0    0.66    0.49
  -6 -21   0    0.46    0.18
   6 -21   0    0.80    0.27
  -6 -21   0    0.28    0.20
  -6  21   0    0.32    0.36
   6  21   0    0.36    0.33
   7 -21   0    0.58    0.90
   7 -21   0    0.71    0.30
  -7 -21   0    0.47    0.19
  -7  21   0    0.09    0.37
   8 -21   0    0.06    1.03
   8 -21   0    0.15    0.29
  -8 -21   0    0.42    0.23
  -8  21   0    1.55    0.54
   8  21   0    0.39    0.22
   0 -22   0   62.63    3.55
   0 -22   0   60.50    3.70
   0  22   0   58.53    3.87
  -1 -22   0    0.91    0.15
   1 -22   0    0.87    0.15
  -1 -22   0    0.86    0.15
   1 -22   0    0.65    0.35
   1  22   0    1.18    0.24
  -1  22   0    0.94    0.25
  -2 -22   0    7.38    0.52
   2 -22   0    5.51    0.94
  -2 -22   0    6.64    0.52
   2 -22   0    7.20    0.53
   2  22   0    7.32    0.59
  -2  22   0    7.44    0.47
  -2  22   0    7.89    0.65
   3 -22   0    0.89    0.18
  -3 -22   0    0.26    0.16
   3 -22   0    0.04    0.55
  -3 -22   0    0.69    0.15
  -3  22   0    0.54    0.27
   3  22   0    0.84    0.24
  -4 -22   0    0.46    0.15
   4 -22   0    0.34    0.18
  -4 -22   0    0.55    0.18
  -4  22   0    0.24    0.29
   4  22   0    0.13    0.22
  -5 -22   0    0.46    0.19
  -5 -22   0    0.64    0.18
   5 -22   0    0.26    0.20
   5  22   0    0.22    0.29
  -5  22   0    0.30    0.30
  -6 -22   0    0.09    0.16
  -6 -22   0    0.26    0.20
   6 -22   0    0.29    0.23
  -6  22   0    0.15    0.35
   6  22   0    0.02    0.30
   7 -22   0    0.42    0.28
   7 -22   0   -0.94    0.89
  -7 -22   0    0.44    0.19
  -7  22   0   -0.30    0.36
   7  22   0    0.28    0.21
   8 -22   0    2.69    0.45
   8 -22   0    1.65    1.08
  -8 -22   0    2.03    0.34
   8  22   0    1.90    0.32
  -8  22   0    2.83    0.65
   0 -23   0    0.84    0.14
   0 -23   0    0.64    0.14
   0  23   0    0.98    0.24
   1 -23   0    3.53    0.33
  -1 -23   0    3.71    0.34
   1 -23   0    2.91    0.58
  -1 -23   0    4.37    0.34
  -1  23   0    4.18    0.44
   1  23   0    4.73    0.46
   2 -23   0    0.76    0.45
   2 -23   0    0.22    0.13
  -2 -23   0    0.01    0.10
  -2 -23   0    0.08    0.13
   2  23   0    0.33    0.20
  -2  23   0    0.24    0.21
  -2  23   0    0.30    0.10
   3 -23   0   -0.30    0.52
   3 -23   0    0.69    0.17
  -3 -23   0    0.17    0.16
  -3 -23   0    0.44    0.14
   3  23   0    0.53    0.23
  -3  23   0    0.04    0.24
  -4 -23   0    4.21    0.42
   4 -23   0    3.87    0.41
  -4 -23   0    4.38    0.38
   4 -23   0    2.38    0.88
  -4  23   0    3.64    0.54
   4  23   0    4.60    0.47
  -5 -23   0    0.27    0.19
   5 -23   0    0.85    0.23
   5  23   0    1.13    0.32
  -5  23   0    0.87    0.38
  -6 -23   0    3.15    0.37
   6 -23   0    3.15    0.43
  -6 -23   0    3.06    0.36
   6 -23   0    2.41    1.08
   6  23   0    3.38    0.52
  -6  23   0    3.05    0.60
   7 -23   0   -0.23    0.93
  -7 -23   0    0.61    0.20
   7 -23   0    1.15    0.31
   7  23   0    1.02    0.25
  -7  23   0    0.16    0.37
   8 -23   0    0.64    0.31
   8 -23   0    0.90    1.04
  -8 -23   0    0.79    0.25
  -8  23   0   -0.32    0.38
   8  23   0    0.36    0.22
   0 -24   0   13.77    0.82
   0 -24   0   11.76    0.84
   0  24   0   12.31    0.95
  -1 -24   0    0.62    0.15
   1 -24   0    0.48    0.14
  -1 -24   0    0.72    0.16
   1 -24   0    0.46    0.31
   1  24   0    0.94    0.25
  -1  24   0    1.03    0.28
  -1  24   0    0.59    0.14
   2 -24   0    0.00    0.11
  -2 -24   0    0.05    0.10
  -2 -24   0    0.10    0.13
   2 -24   0   -0.45    0.38
  -2  24   0   -0.21    0.21
  -2  24   0    0.02    0.08
   2  24   0   -0.07    0.18
  -3 -24   0    1.82    0.23
  -3 -24   0    1.55    0.25
   3 -24   0    1.79    0.26
  -3  24   0    2.21    0.40
   3  24   0    1.77    0.32
   4 -24   0    2.21    0.83
   4 -24   0    2.10    0.30
  -4 -24   0    2.08    0.26
  -4 -24   0    2.00    0.28
  -4  24   0    1.96    0.43
   4  24   0    1.87    0.35
   5 -24   0   -0.36    0.66
   5 -24   0    0.10    0.19
  -5 -24   0    0.08    0.17
  -5 -24   0    0.28    0.15
  -5  24   0    0.07    0.30
   5  24   0   -0.21    0.23
   6 -24   0    4.80    0.53
  -6 -24   0    3.80    0.43
   6 -24   0    4.62    1.27
  -6 -24   0    4.42    0.44
  -6  24   0    4.25    0.68
   6  24   0    5.68    0.63
   7 -24   0    0.58    0.93
  -7 -24   0    0.50    0.22
   7 -24   0    1.31    0.33
   7  24   0    0.36    0.22
  -7  24   0    0.64    0.42
  -8 -24   0    1.18    0.29
   8 -24   0    1.13    1.05
   8 -24   0    0.98    0.33
   8  24   0    0.87    0.26
  -8  24   0    1.29    0.51
   0 -25   0    0.02    0.11
   0 -25   0    0.07    0.12
   0  25   0    0.17    0.19
   1 -25   0    0.96    0.38
  -1 -25   0    0.78    0.16
  -1 -25   0    0.76    0.16
   1 -25   0    0.54    0.14
  -1  25   0    0.81    0.15
  -1  25   0    0.78    0.26
   1  25   0    0.87    0.26
  -2 -25   0   13.86    0.93
  -2 -25   0   14.44    0.94
   2 -25   0   13.66    0.95
  -2  25   0   13.36    0.88
  -2  25   0   15.92    1.12
   2  25   0   14.85    1.05
   3 -25   0    0.13    0.14
  -3 -25   0    0.04    0.16
  -3 -25   0    0.28    0.13
  -3  25   0   -0.36    0.21
   3  25   0    0.11    0.23
   4 -25   0    3.16    0.37
  -4 -25   0    3.69    0.34
  -4 -25   0    3.21    0.36
   4 -25   0    2.63    0.90
  -4  25   0    2.77    0.51
   4  25   0    3.54    0.43
   5 -25   0    0.59    0.79
  -5 -25   0    0.27    0.20
  -5 -25   0    0.09    0.14
   5 -25   0    0.18    0.19
  -5  25   0    0.14    0.31
   5  25   0    0.60    0.28
   6 -25   0    2.19    0.35
  -6 -25   0    1.46    0.27
  -6 -25   0    1.94    0.29
   6 -25   0    2.44    1.06
  -6  25   0    1.58    0.49
   6  25   0    2.33    0.44
   7 -25   0   -0.01    0.24
  -7 -25   0    0.02    0.18
   7 -25   0    1.15    0.96
   7  25   0   -0.10    0.18
  -7  25   0   -0.02    0.42
   8 -25   0    4.57    1.34
   8 -25   0    0.61    0.30
  -8 -25   0    0.40    0.24
  -8  25   0   -0.08    0.46
   8  25   0    0.60    0.24
   0 -26   0   10.08    0.74
   0 -26   0   11.60    0.72
   0  26   0   10.48    0.84
  -1 -26   0    0.10    0.13
   1 -26   0    0.06    0.12
  -1 -26   0    0.14    0.12
   1  26   0    0.22    0.22
  -1  26   0    0.16    0.11
  -1  26   0    0.29    0.25
  -2 -26   0    3.19    0.32
   2 -26   0    2.24    0.67
  -2 -26   0    3.33    0.33
   2 -26   0    3.17    0.33
  -2  26   0    3.21    0.29
   2  26   0    3.56    0.43
  -2  26   0    4.12    0.51
  -3 -26   0    2.89    0.35
   3 -26   0    3.30    0.35
  -3 -26   0    3.51    0.34
  -3  26   0    3.53    0.51
   3  26   0    4.00    0.46
  -4 -26   0    0.56    0.19
   4 -26   0    0.67    0.71
  -4 -26   0    0.57    0.17
   4 -26   0    0.63    0.19
   4  26   0    1.11    0.29
  -4  26   0    0.57    0.32
  -5 -26   0    0.29    0.16
  -5 -26   0    0.27    0.19
   5 -26   0    0.08    0.71
   5 -26   0    0.53    0.21
  -5  26   0    0.31    0.33
   5  26   0    0.50    0.28
  -6 -26   0    0.21    0.18
   6 -26   0    0.28    0.22
   6 -26   0    0.87    0.90
   6  26   0    0.81    0.34
  -6  26   0   -0.03    0.36
  -7 -26   0   -0.08    0.19
   7 -26   0    1.15    0.96
   7 -26   0    0.28    0.24
   7  26   0    0.19    0.21
  -7  26   0   -0.04    0.43
   8 -26   0    0.94    0.32
   8  26   0    0.69    0.24
  -8  26   0   -0.49    0.43
   0 -27   0    0.19    0.12
   0 -27   0    0.06    0.12
   0  27   0    0.20    0.24
   1 -27   0    0.77    0.17
  -1 -27   0    0.89    0.18
  -1 -27   0    1.23    0.20
  -1  27   0    0.72    0.16
  -1  27   0    0.88    0.28
   1  27   0    1.23    0.29
  -2 -27   0    3.20    0.34
   2 -27   0    2.04    0.64
   2 -27   0    3.15    0.33
  -2 -27   0    2.96    0.32
  -2  27   0    3.48    0.49
  -2  27   0    3.22    0.29
   2  27   0    4.07    0.46
  -3 -27   0    0.32    0.15
  -3 -27   0    0.10    0.17
   3 -27   0    0.29    0.15
   3  27   0   -0.26    0.23
  -3  27   0    0.09    0.27
   4 -27   0   -0.04    0.14
   4 -27   0    0.50    0.65
  -4 -27   0    0.24    0.14
  -4 -27   0   -0.11    0.17
   4  27   0   -0.01    0.24
  -4  27   0   -0.07    0.26
  -5 -27   0    0.65    0.20
  -5 -27   0    0.73    0.22
   5 -27   0    1.06    0.24
   5 -27   0   -0.63    0.69
  -5  27   0    0.31    0.33
   5  27   0    0.57    0.29
   6 -27   0    0.72    0.92
  -6 -27   0    1.39    0.27
   6 -27   0    1.32    0.28
  -6  27   0    1.07    0.43
   6  27   0    1.16    0.36
  -7 -27   0    0.76    0.26
   7 -27   0    0.87    0.29
   7 -27   0    0.74    1.03
  -7  27   0    0.60    0.49
   7  27   0    0.90    0.25
   0 -28   0    5.28    0.41
   0  28   0    3.85    0.51
   1 -28   0    0.70    0.17
  -1 -28   0    1.18    0.21
  -1 -28   0    1.39    0.21
  -1  28   0    0.91    0.30
  -1  28   0    0.86    0.17
   1  28   0    1.42    0.30
  -2 -28   0    6.79    0.52
   2 -28   0    6.08    0.52
  -2 -28   0    6.81    0.54
  -2  28   0    6.39    0.47
  -2  28   0    7.03    0.67
   2  28   0    8.81    0.68
   3 -28   0    0.23    0.16
  -3 -28   0    0.68    0.17
  -3 -28   0    0.38    0.18
   3  28   0    0.56    0.29
  -3  28   0    0.01    0.27
   4 -28   0    0.49    0.69
   4 -28   0    0.22    0.16
  -4 -28   0   -0.05    0.14
  -4 -28   0   -0.01    0.17
   4  28   0    0.11    0.26
  -4  28   0   -0.07    0.30
   5 -28   0    1.34    0.28
  -5 -28   0    1.34    0.27
   5 -28   0    1.67    0.81
  -5 -28   0    2.02    0.28
  -5  28   0    0.81    0.40
   5  28   0    1.81    0.36
   6 -28   0    1.31    0.85
  -6 -28   0    2.52    0.33
  -6  28   0    1.14    0.47
   7 -28   0    1.26    0.91
   7 -28   0    0.76    0.28
  -7 -28   0    0.64    0.24
   7  28   0    0.64    0.23
  -7  28   0    0.21    0.45
   0 -29   0    0.17    0.14
   0  29   0    0.45    0.25
   1 -29   0    4.34    0.43
  -1 -29   0    6.28    0.46
  -1 -29   0    6.09    0.45
  -1  29   0    5.43    0.59
   1  29   0    5.21    0.57
  -1  29   0    4.39    0.41
  -2 -29   0    1.25    0.24
   2 -29   0    1.52    0.23
  -2 -29   0    1.56    0.23
   2  29   0    1.22    0.34
  -2  29   0    1.21    0.35
  -2  29   0    1.46    0.20
  -3 -29   0    1.23    0.25
  -3 -29   0    1.48    0.22
   3 -29   0    1.05    0.21
  -3  29   0    1.08    0.36
   3  29   0    1.09    0.32
  -4 -29   0   -0.15    0.12
   4 -29   0   -0.13    0.14
  -4 -29   0   -0.08    0.18
   4 -29   0    0.98    0.66
  -4  29   0    0.03    0.28
   4  29   0    0.08    0.26
   5 -29   0    0.57    0.21
   5 -29   0    1.62    0.79
  -5 -29   0    0.28    0.20
  -5 -29   0    0.83    0.21
  -5  29   0    0.31    0.38
   5  29   0    0.22    0.29
  -6 -29   0    0.19    0.19
   6 -29   0    0.70    0.25
   6 -29   0    2.03    0.92
  -6  29   0   -0.03    0.42
   7 -29   0    1.84    1.02
  -7 -29   0    0.21    0.22
   7 -29   0    0.05    0.22
   7  29   0   -0.04    0.19
  -7  29   0   -0.50    0.41
   0 -30   0    0.22    0.16
   0  30   0    0.63    0.17
   0  30   0    0.43    0.29
  -1 -30   0    0.58    0.18
   1 -30   0    0.71    0.18
  -1 -30   0    0.92    0.20
  -1  30   0    0.88    0.18
   1  30   0    1.09    0.32
  -1  30   0    0.92    0.33
   2 -30   0    0.96    0.20
  -2 -30   0    0.88    0.23
  -2 -30   0    1.10    0.21
   2  30   0    1.40    0.34
  -2  30   0    1.16    0.36
  -2  30   0    1.02    0.17
  -3 -30   0    0.62    0.22
   3 -30   0    0.95    0.20
  -3 -30   0    0.70    0.18
  -3  30   0    0.66    0.32
   3  30   0    0.88    0.32
  -4 -30   0    2.80    0.37
   4 -30   0    3.04    0.89
  -4 -30   0    3.03    0.35
   4 -30   0    3.20    0.36
   4  30   0    3.00    0.46
  -4  30   0    2.71    0.52
  -5 -30   0    0.23    0.18
  -5 -30   0    0.25    0.21
   5 -30   0    0.24    0.19
   5 -30   0    2.14    0.85
  -5  30   0    0.40    0.35
   5  30   0    0.27    0.30
   6 -30   0    3.39    1.05
  -6 -30   0    1.30    0.28
   6 -30   0    1.36    0.29
   6  30   0    0.98    0.27
  -6  30   0    1.32    0.48
   7 -30   0    2.70    1.11
  -7 -30   0    0.57    0.24
   7 -30   0    1.32    0.29
   7  30   0    0.78    0.26
  -7  30   0   -0.65    0.33
   0 -31   0   -0.06    0.13
   0  31   0   -0.12    0.13
   0  31   0   -0.30    0.24
  -1 -31   0    0.47    0.17
   1 -31   0    0.47    0.16
  -1 -31   0    0.62    0.18
   1  31   0    0.39    0.29
  -1  31   0   -0.04    0.13
  -1  31   0    0.76    0.31
  -2 -31   0    5.17    0.48
   2 -31   0    5.32    0.47
  -2 -31   0    6.34    0.48
  -2  31   0    5.67    0.62
   2  31   0    5.11    0.57
  -3 -31   0    0.15    0.18
   3 -31   0   -0.14    0.14
  -3 -31   0    0.00    0.15
   3  31   0   -0.08    0.26
  -3  31   0   -0.27    0.26
   4 -31   0    0.09    0.16
  -4 -31   0    0.34    0.17
  -4 -31   0   -0.28    0.18
  -4  31   0    0.69    0.37
   4  31   0    0.25    0.29
   5 -31   0    0.18    0.18
  -5 -31   0   -0.14    0.15
   5  31   0   -0.02    0.31
  -5  31   0    0.17    0.37
   6 -31   0    2.19    0.99
  -6 -31   0    1.30    0.28
   6 -31   0    1.18    0.29
  -6  31   0    0.86    0.46
   6  31   0    1.67    0.30
   7 -31   0    0.53    0.25
  -7 -31   0    0.09    0.20
   7 -31   0    3.39    1.12
  -7  31   0    0.03    0.44
   7  31   0    0.32    0.23
   0 -32   0    2.75    0.32
   0  32   0    3.10    0.46
   0  32   0    2.99    0.32
  -1 -32   0    0.08    0.14
   1 -32   0    0.12    0.15
  -1  32   0    0.10    0.14
  -1  32   0   -0.16    0.25
   1  32   0    0.33    0.30
   2 -32   0    2.10    0.28
  -2 -32   0    2.29    0.30
  -2 -32   0    2.70    0.32
  -2  32   0    2.85    0.47
   2  32   0    2.46    0.43
   3 -32   0    0.31    0.17
  -3 -32   0    0.66    0.21
  -3 -32   0    0.25    0.16
  -3  32   0    0.13    0.31
   3  32   0    0.18    0.29
  -4 -32   0    0.54    0.19
  -4 -32   0    0.52    0.22
   4 -32   0    0.87    0.20
   4  32   0    0.93    0.35
  -4  32   0    0.45    0.39
  -5 -32   0    0.13    0.19
   5 -32   0    0.70    0.21
  -5  32   0    0.29    0.38
   5  32   0    0.63    0.34
   6 -32   0    0.37    0.22
  -6 -32   0    0.07    0.19
  -6  32   0    0.24    0.42
   6  32   0    0.75    0.25
  -7 -32   0    0.24    0.22
   7 -32   0   -0.09    0.21
   7  32   0    0.33    0.24
  -7  32   0    0.31    0.46
   0 -33   0    0.51    0.18
   0  33   0    0.65    0.32
   0  33   0    0.50    0.17
  -1 -33   0    1.67    0.25
   1 -33   0    2.11    0.28
  -1  33   0    1.70    0.40
   1  33   0    2.15    0.40
  -1  33   0    1.67    0.24
  -2 -33   0    2.93    0.33
   2 -33   0    2.55    0.31
  -2  33   0    2.86    0.49
   2  33   0    2.63    0.45
   3 -33   0    0.13    0.16
  -3 -33   0    0.59    0.19
  -3 -33   0    0.26    0.20
  -3  33   0    0.24    0.30
   3  33   0   -0.05    0.28
  -4 -33   0    1.10    0.23
   4 -33   0    1.15    0.24
  -4  33   0    0.26    0.37
   4  33   0    1.71    0.39
   5 -33   0    1.83    0.29
  -5 -33   0    1.72    0.29
   5  33   0    1.76    0.31
   5  33   0    0.89    0.38
  -5  33   0    1.35    0.47
   6 -33   0    0.46    0.22
  -6 -33   0    0.21    0.21
  -6  33   0   -0.11    0.37
   6  33   0    0.03    0.20
   0 -34   0   28.06    1.86
   0  34   0   30.81    1.79
   0  34   0   27.22    2.01
   1 -34   0    0.26    0.18
  -1 -34   0    0.25    0.16
   1  34   0    0.69    0.31
  -1  34   0    0.36    0.29
   1  34   0    0.32    0.18
  -1  34   0    0.39    0.17
  -2 -34   0    2.03    0.27
   2 -34   0    1.07    0.23
  -2  34   0    2.15    0.46
   2  34   0    1.87    0.39
   3 -34   0    0.15    0.15
  -3 -34   0    0.23    0.18
  -3  34   0   -0.22    0.30
   3  34   0    0.08    0.28
  -4 -34   0    0.55    0.21
   4 -34   0    0.58    0.20
  -4  34   0    0.64    0.41
   4  34   0    0.97    0.37
   5 -34   0    0.04    0.18
  -5 -34   0    0.28    0.19
   5  34   0   -0.01    0.19
   5  34   0    0.05    0.34
  -5  34   0   -0.20    0.33
   6 -34   0    1.17    0.28
  -6 -34   0    1.12    0.29
  -6  34   0    0.71    0.47
   6  34   0    1.42    0.30
   0 -35   0    0.50    0.21
   0  35   0    1.47    0.37
   0  35   0    1.02    0.22
  -1 -35   0    7.87    0.63
   1 -35   0    6.87    0.62
  -1  35   0    6.32    0.75
  -1  35   0    8.90    0.61
   1  35   0    8.95    0.79
   1  35   0    9.30    0.64
  -2 -35   0    0.54    0.19
   2 -35   0    0.70    0.20
   2  35   0    0.23    0.29
  -2  35   0    0.61    0.34
   2  35   0    0.34    0.21
  -3 -35   0    0.09    0.17
   3 -35   0    0.44    0.18
   3  35   0    0.20    0.31
  -3  35   0   -0.03    0.34
  -4 -35   0    0.33    0.19
   4 -35   0    0.31    0.19
  -4  35   0    0.41    0.41
   4  35   0    0.22    0.20
   4  35   0    0.10    0.32
   5 -35   0    0.33    0.21
  -5 -35   0    0.70    0.23
   5  35   0    1.09    0.40
   5  35   0    0.40    0.23
  -5  35   0    0.03    0.41
   6 -35   0   -0.03    0.19
  -6 -35   0   -0.23    0.19
  -6  35   0   -0.37    0.43
   6  35   0    0.06    0.21
   0 -36   0    3.28    0.40
   0  36   0    4.11    0.57
   0  36   0    4.14    0.40
  -1 -36   0    5.33    0.48
   1 -36   0    4.52    0.46
  -1  36   0    4.74    0.63
   1  36   0    5.75    0.49
  -1  36   0    5.26    0.45
   1  36   0    5.16    0.64
  -2 -36   0   -0.20    0.16
   2 -36   0   -0.01    0.15
   2  36   0   -0.11    0.30
  -2  36   0   -0.14    0.31
   2  36   0   -0.11    0.17
  -3 -36   0    6.15    0.53
   3 -36   0    5.51    0.51
   3  36   0    5.39    0.54
  -3  36   0    5.59    0.75
   3  36   0    6.74    0.66
   4 -36   0    0.39    0.20
  -4 -36   0    0.33    0.20
   4  36   0    0.37    0.36
  -4  36   0    0.26    0.40
   4  36   0    0.52    0.22
   5 -36   0    0.45    0.21
  -5 -36   0    0.33    0.21
  -5  36   0   -0.09    0.39
   5  36   0    0.37    0.21
  -6 -36   0    0.06    0.22
   6 -36   0   -0.08    0.20
  -6  36   0    0.22    0.45
   6  36   0   -0.10    0.22
   0 -37   0    0.30    0.19
   0  37   0    0.33    0.34
   0  37   0    0.22    0.17
   1 -37   0    2.17    0.30
  -1 -37   0    2.86    0.33
   1  37   0    2.63    0.47
  -1  37   0    2.19    0.29
  -1  37   0    2.08    0.45
   1  37   0    1.85    0.30
  -2 -37   0    4.77    0.46
   2 -37   0    5.19    0.46
   2  37   0    5.41    0.64
   2  37   0    4.48    0.49
  -2  37   0    4.70    0.66
  -3 -37   0    0.01    0.17
   3 -37   0    0.30    0.19
  -3  37   0    0.89    0.42
   3  37   0    0.29    0.33
   3  37   0   -0.08    0.19
   4 -37   0    1.81    0.29
  -4 -37   0    1.95    0.31
   4  37   0    1.69    0.33
  -4  37   0    2.08    0.55
   4  37   0    1.80    0.47
   5 -37   0    0.22    0.19
  -5 -37   0   -0.17    0.19
   5  37   0    0.10    0.22
  -5  37   0   -0.17    0.39
   0 -38   0    6.88    0.60
   0  38   0    6.77    0.73
   0  38   0    8.08    0.59
  -1 -38   0    0.22    0.17
   1 -38   0    0.01    0.17
  -1  38   0    0.15    0.16
   1  38   0    0.19    0.18
   1  38   0    0.04    0.29
  -1  38   0    0.17    0.32
  -2 -38   0    0.37    0.20
   2 -38   0    0.64    0.21
  -2  38   0    0.91    0.40
   2  38   0    0.96    0.38
   2  38   0    0.65    0.24
   3 -38   0    0.09    0.17
  -3 -38   0   -0.10    0.16
   3  38   0    0.08    0.21
   3  38   0    0.02    0.33
  -3  38   0    0.03    0.34
  -4 -38   0    0.64    0.23
   4 -38   0    0.40    0.21
   4  38   0    0.25    0.23
   4  38   0    0.38    0.37
  -4  38   0    0.65    0.42
  -5 -38   0    0.18    0.20
   5 -38   0    0.11    0.19
  -5  38   0   -0.15    0.41
   5  38   0    0.18    0.22
   0 -39   0   -0.11    0.17
   0  39   0    0.16    0.33
   0  39   0    0.17    0.16
   1 -39   0    0.59    0.22
  -1 -39   0    0.47    0.20
   1  39   0    0.46    0.35
   1  39   0    0.57    0.22
  -1  39   0    0.90    0.38
   2 -39   0    0.61    0.22
  -2 -39   0    0.81    0.23
  -2  39   0    0.08    0.37
   2  39   0    0.52    0.24
   2  39   0    0.95    0.39
   3 -39   0    0.42    0.20
  -3 -39   0    0.41    0.21
  -3  39   0    0.55    0.42
   3  39   0    0.43    0.36
   3  39   0    0.35    0.24
   4 -39   0    0.08    0.19
  -4 -39   0   -0.12    0.19
   4  39   0    0.32    0.23
  -4  39   0   -0.54    0.34
   4  39   0    0.21    0.36
  -5 -39   0    1.71    0.31
   5 -39   0    1.13    0.27
  -5  39   0    2.08    0.59
   5  39   0    1.26    0.31
   0 -40   0    0.84    0.23
   0  40   0    1.10    0.23
   0  40   0    0.79    0.36
   1 -40   0    0.59    0.21
  -1 -40   0    0.95    0.23
   1  40   0    0.42    0.37
  -1  40   0    0.79    0.37
   1  40   0    1.05    0.24
  -2 -40   0    0.15    0.20
   2 -40   0    0.46    0.20
   2  40   0    0.24    0.21
  -2  40   0   -0.05    0.36
   2  40   0    0.38    0.35
   3 -40   0    1.52    0.27
  -3 -40   0    1.28    0.28
   3  40   0    1.11    0.29
   3  40   0    1.49    0.44
  -3  40   0    1.13    0.46
  -4 -40   0    1.04    0.27
   4 -40   0    1.15    0.25
   4  40   0    0.63    0.39
   4  40   0    1.53    0.32
  -4  40   0    0.95    0.49
   0 -41   0    0.29    0.19
   0  41   0   -0.05    0.34
   0  41   0    0.09    0.18
  -1 -41   0   -0.12    0.17
   1 -41   0    0.10    0.17
  -1  41   0    0.13    0.33
   1  41   0    0.16    0.19
   1  41   0    0.13    0.33
  -2 -41   0    2.11    0.33
   2 -41   0    2.25    0.34
   2  41   0    1.88    0.32
  -2  41   0    1.59    0.51
   2  41   0    2.59    0.50
  -3 -41   0   -0.13    0.18
   3 -41   0    0.11    0.18
   3  41   0    0.25    0.22
   3  41   0    0.24    0.35
  -3  41   0    0.01    0.40
   4 -41   0   -0.19    0.18
  -4 -41   0    0.15    0.21
   4  41   0   -0.45    0.18
  -4  41   0   -0.30    0.43
   0 -42   0    0.26    0.21
   0  42   0   -0.08    0.17
   0  42   0   -0.08    0.33
  -1 -42   0    0.55    0.21
   1 -42   0    0.36    0.21
   1  42   0    0.38    0.38
   1  42   0    0.70    0.23
  -1  42   0    0.29    0.37
   2 -42   0   -0.01    0.19
  -2 -42   0   -0.13    0.18
  -2  42   0   -0.31    0.33
   2  42   0    0.25    0.37
   2  42   0    0.08    0.20
   3 -42   0    0.76    0.24
  -3 -42   0    1.24    0.28
  -3  42   0    0.59    0.44
   3  42   0    0.64    0.41
   3  42   0    0.94    0.28
   4 -42   0    0.64    0.24
  -4 -42   0    0.69    0.26
  -4  42   0    0.26    0.43
   4  42   0    0.30    0.23
   0 -43   0   -0.15    0.17
   0  43   0   -0.20    0.31
   0  43   0   -0.22    0.17
   1 -43   0    0.63    0.23
  -1 -43   0    0.31    0.21
  -1  43   0    0.28    0.40
   1  43   0    0.79    0.23
   1  43   0    0.54    0.39
  -2 -43   0   -0.16    0.18
   2 -43   0   -0.16    0.17
   2  43   0    0.11    0.20
   2  43   0   -0.40    0.34
  -2  43   0   -0.15    0.35
  -3 -43   0    0.11    0.21
   3 -43   0    0.21    0.20
  -3  43   0   -0.07    0.38
   3  43   0    0.15    0.21
   3  43   0    0.27    0.38
   0 -44   0    0.16    0.19
   0  44   0    0.04    0.37
   0  44   0   -0.04    0.17
   1 -44   0    0.16    0.20
  -1 -44   0    0.19    0.19
   1  44   0   -0.30    0.31
  -1  44   0    0.11    0.39
   1  44   0    0.12    0.20
  -2 -44   0    0.21    0.21
   2 -44   0    0.26    0.21
  -2  44   0    0.03    0.39
   2  44   0   -0.11    0.35
   2  44   0    0.39    0.23
   3 -44   0   -0.09    0.19
  -3 -44   0   -0.01    0.21
  -3  44   0    0.02    0.44
   3  44   0   -0.04    0.21
   3  44   0   -0.29    0.37
   0 -45   0   -0.14    0.18
   0  45   0   -0.53    0.30
   1 -45   0    0.13    0.20
  -1 -45   0   -0.09    0.18
  -1  45   0    0.20    0.39
   1  45   0    0.22    0.20
   1  45   0   -0.10    0.36
   2 -45   0    0.22    0.21
  -2 -45   0   -0.05    0.21
   2  45   0    0.46    0.24
   2  45   0   -0.21    0.37
  -2  45   0    0.75    0.43
   0 -46   0    0.28    0.22
   0  46   0    0.15    0.40
  -1 -46   0   -0.06    0.20
   1 -46   0   -0.04    0.19
  -1  46   0    0.00    0.39
   1  46   0   -0.11    0.21
   1  46   0    0.17    0.40
   9   0  -1    1.77    1.23
  -9   0   1   -0.21    0.42
   8   0  -1    0.90    0.38
  -8   0   1    0.96    0.66
  -8   0   1    0.29    0.39
  -7   0   1    0.98    0.64
   7   0  -1    0.52    0.29
  -7   0   1    0.30    0.36
  -6   0   1    0.20    0.34
  -6   0   1    2.79    0.71
   5   0  -1   -0.07    0.21
  -5   0   1    1.34    0.35
  -5   0   1    0.07    0.39
  -4   0   1    0.13    0.47
  -4   0   1    0.33    0.14
   4   0  -1    0.32    0.22
  -4   0   1    0.36    0.27
   3   0  -1   -0.07    0.12
  -3   0   1    0.48    0.31
  -3   0   1   -0.24    0.16
   2   0  -1   -0.09    0.10
  -2   0   1   -0.01    0.15
  -1   0  -1    0.11    0.11
  -1   0  -1   -0.05    0.03
   1   0   1   -0.01    0.02
   2   0   1   -0.25    0.12
  -2   0  -1   -0.02    0.14
  -3   0  -1   -0.09    0.16
  -3   0  -1    1.54    0.36
   3   0   1   -0.22    0.12
  -4   0  -1   -0.94    0.37
   4   0   1   -0.14    0.20
  -4   0  -1   -0.29    0.24
  -5   0  -1    0.67    0.47
   5   0   1   -0.15    0.23
  -6   0  -1    2.83    0.72
  -7   0  -1    0.49    0.55
  -7   0  -1    0.05    0.33
   7   0   1   -0.66    0.23
  -8   0  -1   -0.06    0.55
  -8   0  -1    0.29    0.42
   8   0   1   -0.19    0.32
   9   0   1    0.59    0.42
  -9   0  -1    0.38    0.43
  -9   0  -1    1.30    0.75
  -9  -1   1    2.19    0.57
   9  -1  -1   -0.36    1.06
  -9   1   1    2.62    0.61
   9   1  -1    1.37    1.27
  -8  -1   1   -0.35    0.35
  -8  -1   1    0.42    0.57
   8  -1  -1    0.54    0.37
  -8   1   1    0.73    0.44
  -8   1   1    1.83    0.70
   8   1  -1   -0.11    0.34
  -7  -1   1    0.66    0.61
   7  -1  -1    0.20    0.28
  -7  -1   1    0.51    0.37
  -7   1   1    0.19    0.39
  -7   1   1    0.12    0.53
   7   1  -1    0.07    0.26
   6  -1  -1    1.71    0.39
  -6  -1   1    2.48    0.23
  -6  -1   1    1.71    0.42
  -6  -1   1    3.10    0.76
  -6   1   1    1.42    0.44
  -6   1   1    2.89    0.72
   6   1  -1    1.93    0.39
  -5  -1   1   13.18    1.00
  -5  -1   1   12.51    0.75
   5  -1  -1   11.03    0.91
  -5  -1   1   13.26    1.32
  -5   1   1   11.57    0.98
  -5   1   1   11.66    1.34
   5   1  -1   11.06    0.91
  -5   1   1   11.52    0.74
  -4  -1   1    1.06    0.29
  -4  -1   1    1.24    0.52
  -4   1   1    1.45    0.32
  -4   1   1    1.59    0.17
  -4   1   1    1.08    0.53
  -3  -1   1    6.38    0.65
  -3  -1   1    3.86    0.43
   3  -1  -1    4.33    0.42
  -3   1   1    4.23    0.44
  -3   1   1    4.44    0.30
  -3   1   1    5.22    0.67
   3   1  -1    4.59    0.40
  -2  -1   1  159.18   10.54
   2  -1  -1  171.86   10.23
  -2  -1   1  196.32   13.11
  -2   1   1  164.48    9.78
  -2   1   1  161.78   10.54
  -2   1   1  166.38   13.09
  -1  -1   1    7.84    0.66
   1  -1  -1    7.74    0.49
  -1  -1   1    7.54    0.52
  -1   1   1    7.95    0.66
  -1   1   1    6.94    0.52
   1  -1   1  303.43   18.33
   1  -1   1  310.22   17.59
  -1  -1  -1  323.91   23.38
   1   1   1  283.79   17.60
  -2  -1  -1  558.43   31.72
  -2  -1  -1  500.67   32.60
  -2  -1  -1  537.11   40.45
   2  -1   1  510.70   30.42
   2  -1   1  550.13   31.70
  -2   1  -1  529.21   40.45
  -2   1  -1  512.54   32.61
  -3  -1  -1   22.15    1.52
  -3  -1  -1   24.92    1.98
   3  -1   1   23.39    1.49
   3   1   1   22.35    1.48
  -3   1  -1   21.49    1.96
  -3   1  -1   23.08    1.53
   4  -1   1    0.79    0.26
  -4  -1  -1    3.67    0.69
  -4   1  -1    0.65    0.47
  -4   1  -1    0.26    0.30
   4   1   1    1.70    0.30
  -5  -1  -1   21.91    2.01
   5  -1   1   19.29    1.28
   5  -1   1   21.12    1.50
  -5  -1  -1   26.42    1.58
  -5   1  -1   19.51    1.99
  -5   1  -1   19.96    1.55
   5   1   1   20.80    1.49
   5   1   1   24.32    1.30
   6  -1   1    6.82    0.69
  -6  -1  -1    5.49    0.67
  -6  -1  -1    7.70    1.08
  -6   1  -1    5.18    0.69
  -6   1  -1    7.28    1.07
   6   1   1    6.13    0.67
   6   1   1    5.69    0.42
  -7  -1  -1    4.47    0.64
   7  -1   1    4.49    0.59
  -7  -1  -1    3.41    0.87
  -7   1  -1    4.20    0.64
   7   1   1    5.09    0.64
  -7   1  -1    4.91    0.99
  -8  -1  -1   -0.31    0.55
   8  -1   1    0.22    0.36
  -8  -1  -1   -0.28    0.36
  -8   1  -1    0.45    0.66
   8   1   1    0.29    0.36
  -8   1  -1   -0.31    0.36
   9  -1   1    0.64    0.41
  -9  -1  -1    0.36    0.68
  -9   1  -1   -0.04    0.41
   9   1   1    0.45    0.39
  -9   1  -1   -0.35    0.65
  -9  -2   1    0.58    0.46
   9  -2  -1    0.69    1.24
  -9   2   1    0.12    0.43
   9   2  -1    0.85    1.16
   8  -2  -1   -0.41    0.31
  -8  -2   1   -1.09    0.48
  -8  -2   1    0.12    0.36
   8   2  -1    0.11    0.35
  -8   2   1   -0.07    0.39
  -8   2   1    0.40    0.62
  -7  -2   1    4.21    0.63
  -7  -2   1    4.64    0.97
   7  -2  -1    4.16    0.57
  -7   2   1    4.82    0.96
  -7   2   1    4.17    0.67
   7   2  -1    4.98    0.59
   6  -2  -1    2.52    0.43
  -6  -2   1    3.22    0.30
  -6  -2   1    2.38    0.73
  -6   2   1    2.27    0.70
   6   2  -1    2.29    0.42
  -5  -2   1   13.85    1.15
   5  -2  -1   15.35    1.11
  -5  -2   1   14.82    1.53
   5   2  -1   14.40    1.11
  -5   2   1   16.15    1.57
  -5   2   1   15.56    1.20
  -5   2   1   16.62    0.94
  -4  -2   1    3.79    0.65
  -4   2   1    0.82    0.29
  -4   2   1    0.77    0.51
   3  -2  -1   21.48    1.36
  -3  -2   1   20.02    1.42
  -3  -2   1   21.36    1.30
  -3  -2   1   22.38    1.82
  -3   2   1   20.15    1.82
  -3   2   1   20.32    1.44
  -3   2   1   21.14    1.23
  -2  -2   1  789.94   45.90
   2  -2  -1  810.45   47.84
  -2  -2   1  795.60   60.95
  -2  -2   1  811.59   47.80
  -2  -2   1  789.57   49.17
  -2   2   1  795.15   60.97
  -2   2   1  778.50   49.18
  -2   2   1  806.05   45.87
   1  -2  -1  348.18   20.33
  -1  -2   1  342.64   20.91
  -1  -2   1  326.46   19.51
  -1  -2   1  342.30   25.91
  -1   2   1  333.76   20.91
  -1   2   1  339.24   25.92
  -1  -2  -1   37.59    3.17
  -1  -2  -1   46.81    2.47
   1  -2   1   39.10    2.35
   1  -2   1   39.93    2.49
   1   2   1   42.14    2.37
  -1   2  -1   41.42    3.19
  -1   2  -1   38.68    2.55
   2  -2   1  119.46    7.24
  -2  -2  -1  127.63    7.56
  -2  -2  -1  139.97    9.73
   2  -2   1  125.88    7.60
  -2   2  -1  122.63    9.73
  -2   2  -1  119.66    7.82
  -3  -2  -1   29.73    1.83
  -3  -2  -1   29.23    2.45
   3  -2   1   29.66    1.89
  -3  -2  -1   28.12    1.93
   3  -2   1   31.23    1.72
  -3   2  -1   28.86    2.46
  -3   2  -1   29.52    1.95
   4  -2   1   33.53    2.01
  -4  -2  -1   35.81    2.91
   4  -2   1   35.67    2.23
   4   2   1   36.22    2.22
  -4   2  -1   32.22    2.90
  -4   2  -1   32.92    2.29
  -5  -2  -1   34.77    2.99
   5  -2   1   35.12    2.03
   5  -2   1   36.33    2.28
  -5  -2  -1   33.84    2.33
   5   2   1   33.48    2.05
  -5   2  -1   38.15    2.38
   5   2   1   33.81    2.27
  -5   2  -1   32.72    3.01
  -6  -2  -1    3.59    0.79
   6  -2   1    2.48    0.41
  -6  -2  -1    1.33    0.40
   6   2   1    1.87    0.39
  -6   2  -1    1.92    0.67
  -6   2  -1    0.61    0.40
  -7  -2  -1    0.51    0.35
   7  -2   1    0.07    0.31
  -7  -2  -1    0.28    0.54
  -7   2  -1    0.28    0.37
   7   2   1   -0.48    0.26
  -7   2  -1    0.03    0.50
   8  -2   1    0.54    0.38
  -8  -2  -1    0.22    0.38
  -8  -2  -1    0.38    0.59
  -8   2  -1    0.14    0.42
  -8   2  -1   -0.12    0.57
   8   2   1    0.10    0.34
   9  -2   1    3.89    0.64
  -9  -2  -1    4.61    1.09
  -9   2  -1    4.03    1.08
   9   2   1    2.92    0.61
  -9   2  -1    3.17    0.65
   9  -3  -1   -0.21    1.13
  -9  -3   1    1.15    0.48
  -9   3   1    0.86    0.49
   9   3  -1    1.30    1.12
  -8  -3   1    0.57    0.41
  -8  -3   1    0.56    0.60
   8  -3  -1    1.22    0.40
  -8   3   1    0.79    0.44
   8   3  -1    0.45    0.35
  -8   3   1    0.82    0.69
  -7  -3   1    0.44    0.35
  -7  -3   1   -0.01    0.54
   7  -3  -1    0.21    0.28
   7   3  -1    0.03    0.26
  -7   3   1    0.27    0.53
  -7   3   1    0.07    0.34
   6  -3  -1   15.64    1.14
  -6  -3   1   12.45    1.55
  -6   3   1   12.79    1.58
   6   3  -1   16.36    1.14
   5  -3  -1    2.05    0.36
  -5  -3   1    2.32    0.59
   5   3  -1    1.33    0.33
  -5   3   1    2.29    0.60
  -5   3   1    4.04    0.51
  -4  -3   1   49.78    2.76
  -4  -3   1   53.91    3.08
   4  -3  -1   44.91    2.95
  -4  -3   1   48.63    3.87
   4   3  -1   46.61    2.94
  -4   3   1   44.71    3.87
  -4   3   1   42.19    2.73
  -4   3   1   46.63    3.08
  -3  -3   1   24.35    1.45
  -3  -3   1   24.16    2.06
   3  -3  -1   24.01    1.57
  -3  -3   1   23.10    1.62
  -3  -3   1   24.63    1.51
  -3   3   1   25.41    2.09
  -3   3   1   26.25    1.43
  -3   3   1   22.61    1.64
  -2  -3   1    8.17    0.49
  -2  -3   1    8.43    0.60
  -2  -3   1    7.18    0.50
   2  -3  -1    7.80    0.56
  -2   3   1    7.48    0.46
  -2   3   1    7.46    0.61
   1  -3  -1    2.91    0.24
  -1  -3   1    3.00    0.26
  -1  -3   1    2.88    0.21
  -1   3   1    2.66    0.28
   0  -3  -1  165.35   10.36
   0   3  -1  158.08   10.66
   0   3   1  177.17   10.65
   0   3  -1  189.93   13.22
  -1  -3  -1   29.21    1.69
   1  -3   1   28.73    1.80
  -1  -3  -1   27.93    2.28
  -1   3  -1   28.78    1.84
  -1   3  -1   29.81    2.30
  -2  -3  -1  634.61   36.52
  -2  -3  -1  603.41   46.62
   2  -3   1  593.83   35.05
   2  -3   1  609.49   36.55
  -2  -3  -1  612.87   35.09
  -2   3  -1  606.03   37.61
  -2   3  -1  604.45   46.64
  -3  -3  -1    2.11    0.42
  -3  -3  -1    2.18    0.19
  -3  -3  -1    1.60    0.26
   3  -3   1    1.54    0.25
  -3  -3  -1    1.59    0.19
  -3   3  -1    1.74    0.29
  -3   3  -1    2.61    0.47
   4  -3   1   37.82    2.53
   4  -3   1   40.63    2.31
  -4  -3  -1   37.36    3.29
  -4  -3  -1   41.31    2.60
  -4  -3  -1   42.17    2.45
  -4   3  -1   36.03    3.33
  -4   3  -1   40.31    2.63
   5  -3   1    3.94    0.50
  -5  -3  -1    5.13    0.83
  -5  -3  -1    5.12    0.54
  -5   3  -1    4.83    0.80
   5   3   1    3.69    0.49
  -6  -3  -1    0.47    0.35
   6  -3   1    1.96    0.39
  -6  -3  -1    2.20    0.68
  -6   3  -1    0.47    0.38
  -6   3  -1    2.52    0.70
   6   3   1    1.64    0.38
  -7  -3  -1    1.72    0.66
   7  -3   1    0.89    0.36
  -7  -3  -1    0.79    0.35
  -7   3  -1    1.10    0.62
  -7   3  -1    1.31    0.44
   7   3   1    1.09    0.38
  -8  -3  -1   -0.01    0.37
  -8  -3  -1    0.65    0.64
   8  -3   1    0.49    0.37
   8   3   1    1.38    0.43
  -8   3  -1    0.24    0.42
  -8   3  -1   -0.22    0.58
   9  -3   1    1.07    0.44
  -9  -3  -1   -0.10    0.66
  -9   3  -1    1.59    0.78
   9   3   1    0.35    0.40
  -9   3  -1    0.32    0.44
   9  -4  -1    0.85    1.10
  -9  -4   1    0.74    0.43
   9   4  -1   -0.09    1.03
  -9   4   1    0.28    0.45
   8  -4  -1    0.24    0.35
  -8  -4   1    0.85    0.42
  -8  -4   1    1.07    0.70
   8   4  -1    0.65    0.37
  -8   4   1    2.23    0.76
  -8   4   1    0.55    0.42
   7  -4  -1    3.54    0.52
  -7  -4   1    3.79    0.84
  -7  -4   1    3.03    0.55
  -7   4   1    2.57    0.81
   7   4  -1    3.87    0.53
  -7   4   1    3.79    0.63
  -5  -4   1   20.01    1.37
  -5  -4   1   20.04    1.80
   5  -4  -1   18.74    1.31
  -5   4   1   18.25    1.11
  -5   4   1   18.88    1.42
  -5   4   1   16.69    1.78
   5   4  -1   18.26    1.30
   4  -4  -1   49.03    3.07
  -4  -4   1   45.45    2.86
  -4  -4   1   50.80    3.17
  -4  -4   1   48.08    3.99
  -4   4   1   47.80    2.83
  -4   4   1   47.21    4.02
  -4   4   1   54.83    3.22
   3  -4  -1    5.27    0.49
  -3  -4   1    8.11    0.73
  -3  -4   1    5.94    0.42
  -3  -4   1    5.03    0.50
  -3   4   1    6.23    0.74
  -3   4   1    6.29    0.56
   2  -4  -1  291.38   16.82
  -2  -4   1  276.66   21.48
  -2  -4   1  281.32   17.32
  -2  -4   1  284.04   16.12
  -2  -4   1  275.21   16.79
  -2   4   1  276.88   16.11
  -2   4   1  273.78   21.50
  -2   4   1  280.79   17.34
  -1  -4   1   31.15    2.01
   1  -4  -1   30.07    1.94
  -1  -4   1   31.84    1.86
  -1   4   1   29.72    2.02
  -1   4   1   35.80    1.84
   0  -4   1  382.64   21.92
   0  -4  -1  369.27   21.92
   0   4   1  359.51   22.56
   0   4  -1  379.01   27.93
   0   4   1  327.47   21.04
   0   4  -1  373.70   22.60
   1  -4   1    0.38    0.04
  -1  -4  -1    0.45    0.07
   1  -4   1    0.53    0.11
  -1  -4  -1    0.39    0.06
  -1   4  -1    0.49    0.12
   1   4   1    0.40    0.10
  -1   4  -1    0.33    0.19
  -2  -4  -1   77.23    6.06
  -2  -4  -1   79.75    4.50
  -2  -4  -1   79.90    4.70
   2  -4   1   78.08    4.74
  -2   4  -1   76.01    4.87
  -2   4  -1   75.49    6.08
   3  -4   1    3.65    0.38
  -3  -4  -1    3.27    0.30
  -3  -4  -1    3.80    0.38
   3  -4   1    3.64    0.24
  -3  -4  -1    5.91    0.64
  -3   4  -1    4.25    0.63
  -3   4  -1    3.38    0.39
   4  -4   1   26.14    1.47
   4  -4   1   22.50    1.67
  -4  -4  -1   27.27    2.25
  -4   4  -1   27.08    1.75
  -4   4  -1   22.41    2.25
  -5  -4  -1    8.36    1.07
   5  -4   1    9.19    0.76
   5  -4   1    8.26    0.53
  -5  -4  -1    9.17    0.75
  -5   4  -1    8.83    0.81
  -5   4  -1    7.70    1.04
   5   4   1    8.09    0.76
   6  -4   1   12.63    1.06
  -6  -4  -1   12.48    1.05
  -6  -4  -1   12.29    1.44
   6   4   1   11.26    1.02
  -6   4  -1   11.66    1.10
   6   4   1   13.79    0.82
  -6   4  -1   12.88    1.46
  -7  -4  -1   -0.14    0.29
  -7  -4  -1    0.63    0.54
   7  -4   1   -0.11    0.30
  -7   4  -1   -0.19    0.34
   7   4   1    0.42    0.33
  -7   4  -1   -0.19    0.54
   8  -4   1    0.03    0.35
  -8  -4  -1    0.32    0.36
  -8  -4  -1    0.89    0.66
   8   4   1   -0.35    0.33
  -8   4  -1   -0.10    0.40
  -8   4  -1    0.76    0.66
  -9  -4  -1    0.29    0.69
   9  -4   1    0.87    0.43
  -9   4  -1    1.28    0.51
   9   4   1    0.18    0.38
  -9   4  -1    2.07    0.81
  -9  -5   1    2.46    0.56
   9   5  -1    2.39    1.25
  -9   5   1    2.30    0.63
  -8  -5   1    1.28    0.72
   8  -5  -1    1.02    0.39
  -8  -5   1    0.83    0.41
  -8   5   1    0.33    0.44
  -8   5   1    0.76    0.69
  -7  -5   1    0.91    0.57
  -7  -5   1    0.04    0.32
   7  -5  -1    0.69    0.31
  -7   5   1    0.07    0.54
  -7   5   1    0.16    0.37
   7   5  -1    1.81    0.37
   6  -5  -1    7.94    0.82
  -6  -5   1    9.36    0.85
  -6  -5   1    9.61    1.18
  -6   5   1    9.63    1.29
  -6   5   1    8.98    0.91
   6   5  -1   10.22    0.87
  -5  -5   1   12.84    0.85
   5  -5  -1   13.32    1.01
  -5  -5   1   13.30    1.03
  -5  -5   1   12.45    1.36
   5   5  -1   13.69    1.01
  -5   5   1   14.20    0.81
  -5   5   1   14.74    1.47
  -5   5   1   12.87    1.09
   4  -5  -1   10.89    0.98
  -4   5   1   14.72    1.41
  -4   5   1   14.39    0.81
  -3  -5   1   36.21    2.12
   3  -5  -1   35.76    2.26
  -3  -5   1   36.40    2.20
  -3  -5   1   34.72    2.93
  -3  -5   1   35.82    2.33
  -3   5   1   35.53    2.96
  -3   5   1   36.68    2.37
  -3   5   1   36.26    2.08
  -2  -5   1  122.85    9.87
  -2  -5   1  126.06    7.69
   2  -5  -1  128.84    7.72
  -2  -5   1  126.23    7.95
  -2  -5   1  126.62    7.39
  -2   5   1  131.01    7.37
  -2   5   1  126.33    7.98
  -2   5   1  136.06    9.91
  -1  -5   1    0.05    0.06
   1  -5  -1   -0.08    0.07
   1   5  -1   -0.10    0.13
  -1   5   1    0.00    0.03
  -1   5   1    0.11    0.14
   0  -5   1  170.05    9.27
   0  -5  -1  148.74    9.26
   0   5  -1  156.14   11.80
   0   5  -1  145.35    9.54
   0   5   1  151.71    9.53
  -1  -5  -1   25.92    1.36
   1  -5   1   22.32    1.34
   1  -5   1   22.96    1.45
  -1   5  -1   23.26    1.48
   1   5   1   20.80    1.47
  -1   5  -1   23.98    1.86
  -2  -5  -1   39.84    2.13
  -2  -5  -1   37.48    2.91
   2  -5   1   35.13    2.27
  -2  -5  -1   36.19    2.22
  -2   5  -1   34.38    2.93
  -2   5  -1   35.09    2.33
  -3  -5  -1   26.41    1.46
   3  -5   1   24.56    1.60
  -3  -5  -1   24.10    1.61
  -3  -5  -1   23.46    2.06
  -3  -5  -1   24.48    1.53
  -3   5  -1   24.45    1.65
  -3   5  -1   23.86    2.10
  -4  -5  -1  129.90    7.63
  -4  -5  -1  132.61    8.26
  -4  -5  -1  125.48   10.31
  -4  -5  -1  151.12    7.97
   4  -5   1  130.78    8.05
  -4   5  -1  122.04   10.33
  -4   5  -1  129.60    8.30
  -5  -5  -1    4.72    0.87
   5  -5   1    5.91    0.37
   5  -5   1    5.01    0.59
  -5  -5  -1    6.53    0.44
  -5  -5  -1    6.16    0.59
  -5   5  -1    6.86    0.97
  -5   5  -1    4.80    0.62
   6  -5   1   22.95    1.53
  -6  -5  -1   20.99    2.04
  -6  -5  -1   16.61    1.48
  -6   5  -1   22.38    2.10
   6   5   1   23.30    1.51
  -6   5  -1   17.84    1.56
   6   5   1   21.38    1.27
  -7  -5  -1    8.75    1.18
  -7  -5  -1    9.60    0.90
   7  -5   1    9.89    0.88
   7   5   1   10.69    0.91
  -7   5  -1    8.06    0.92
  -7   5  -1    8.69    1.36
  -8  -5  -1    0.93    0.71
   8  -5   1   -0.11    0.34
  -8  -5  -1    1.28    0.42
  -8   5  -1    0.08    0.58
   8   5   1    0.20    0.37
  -8   5  -1   -0.34    0.37
   9  -5   1    0.59    0.39
  -9  -5  -1    0.11    0.60
  -9   5  -1    0.47    0.46
   9   5   1    0.17    0.38
  -9   5  -1    0.67    0.73
  -9  -6   1    0.33    0.43
   9  -6  -1    0.96    1.18
  -9   6   1    0.59    0.50
   9   6  -1   -0.06    1.00
  -8  -6   1    2.06    0.77
  -8   6   1    1.56    0.55
  -8   6   1    2.51    0.89
  -7  -6   1    2.19    0.77
  -7  -6   1    2.54    0.50
   7  -6  -1    2.83    0.47
  -7   6   1    3.42    0.91
  -7   6   1    4.70    0.68
   7   6  -1    3.56    0.53
  -6  -6   1   28.72    2.42
  -6  -6   1   38.02    3.19
  -6  -6   1   38.03    2.15
   6  -6  -1   38.37    2.39
  -6   6   1   28.46    2.47
  -6   6   1   38.78    3.23
   6   6  -1   41.89    2.40
  -5  -6   1    0.16    0.26
  -5  -6   1    0.13    0.12
  -5  -6   1    0.24    0.42
   5  -6  -1    0.38    0.23
  -5   6   1    0.20    0.28
  -5   6   1    0.71    0.45
  -4  -6   1  136.72    7.74
  -4  -6   1  135.51    8.06
  -4  -6   1  141.77    8.39
   4  -6  -1  131.21    8.13
  -4  -6   1  133.07   10.44
  -4   6   1  128.69    7.70
  -4   6   1  129.96    8.42
  -4   6   1  132.79   10.49
  -3  -6   1    1.39    0.38
  -3  -6   1    1.15    0.14
  -3  -6   1    1.30    0.15
  -3  -6   1    1.25    0.23
   3  -6  -1    1.27    0.22
  -2  -6   1    0.81    0.24
   2  -6  -1    0.77    0.15
  -2  -6   1    0.94    0.18
  -2  -6   1    0.68    0.11
  -2  -6   1    0.92    0.10
  -2   6   1    0.69    0.20
  -1  -6   1    9.77    0.57
  -1  -6   1    8.80    0.57
   1  -6  -1    9.34    0.60
   1  -6  -1    8.03    1.01
  -1   6   1    9.42    0.54
  -1   6   1    9.85    0.67
   1   6  -1    7.78    0.65
   0  -6  -1    3.07    0.24
   0  -6   1    3.61    0.25
   0   6  -1    3.04    0.27
   0   6  -1    4.40    0.31
   0   6   1    3.70    0.27
   1  -6   1    3.54    0.23
  -1  -6  -1    3.42    0.26
   1  -6   1    3.32    0.33
  -1  -6  -1    3.74    0.26
  -1   6  -1    3.68    0.33
   1   6   1    3.01    0.30
  -1   6  -1    3.79    0.44
  -2  -6  -1  149.21    8.53
  -2  -6  -1  152.41    8.89
   2  -6   1  147.89    8.93
  -2  -6  -1  143.22   11.38
  -2   6  -1  148.41   11.42
  -2   6  -1  145.40    9.19
  -3  -6  -1   16.27    0.95
  -3  -6  -1   15.49    0.99
  -3  -6  -1   13.19    1.36
   3  -6   1   13.76    1.06
  -3  -6  -1   16.12    1.07
  -3   6  -1   18.91    1.13
  -3   6  -1   14.58    1.42
  -4  -6  -1   54.95    4.64
  -4  -6  -1   57.96    3.36
   4  -6   1   56.35    3.60
  -4  -6  -1   58.80    3.67
  -4   6  -1   59.15    4.69
  -5  -6  -1   13.58    1.41
  -5  -6  -1   14.07    0.92
  -5  -6  -1   13.98    1.03
   5  -6   1   13.12    1.03
  -5  -6  -1   13.42    0.86
  -5   6  -1   13.33    1.10
  -5   6  -1   12.75    1.41
  -6  -6  -1   -0.16    0.30
  -6  -6  -1    1.03    0.57
   6  -6   1    0.12    0.31
  -6   6  -1    1.50    0.63
  -6   6  -1    0.31    0.40
   6   6   1   -0.47    0.29
  -7  -6  -1   -0.36    0.52
  -7  -6  -1    0.52    0.33
   7  -6   1    1.03    0.35
  -7   6  -1    0.77    0.40
  -7   6  -1   -0.35    0.53
   7   6   1    0.12    0.32
  -8  -6  -1    1.90    0.47
  -8  -6  -1    1.24    0.75
   8  -6   1    2.22    0.49
  -8   6  -1    1.47    0.54
  -8   6  -1    1.32    0.74
  -9  -6  -1   -0.55    0.60
   9  -6   1   -0.12    0.35
  -9   6  -1   -0.31    0.42
  -9   6  -1    0.00    0.60
   9   6   1    0.03    0.37
  -9  -7   1    0.59    0.42
   9  -7  -1    0.54    1.22
  -9   7   1    0.50    0.47
   9   7  -1    1.03    1.04
   8  -7  -1    3.78    0.58
  -8  -7   1    4.15    0.64
  -8  -7   1    4.11    1.01
  -8   7   1    4.14    1.03
   8   7  -1    5.50    0.68
  -8   7   1    4.01    0.71
   7  -7  -1    1.07    0.34
  -7  -7   1    0.51    0.33
  -7  -7   1    1.01    0.59
   7   7  -1    0.88    0.34
  -7   7   1    0.09    0.53
  -7   7   1    0.27    0.38
  -6   7   1   14.80    1.65
  -5  -7   1    0.01    0.11
  -5  -7   1   -0.06    0.35
  -5  -7   1    0.12    0.23
  -5  -7   1    0.01    0.11
   5  -7  -1    0.06    0.20
  -5   7   1   -0.01    0.28
  -5   7   1    0.32    0.42
  -4  -7   1   68.08    4.42
  -4  -7   1   67.35    4.05
   4  -7  -1   70.96    4.29
  -4  -7   1   69.94    5.55
  -4  -7   1   67.26    4.21
  -4   7   1   74.14    5.61
  -3  -7   1    3.91    0.37
  -3  -7   1    3.04    0.25
   3  -7  -1    2.21    0.30
  -3  -7   1    3.57    0.27
  -3  -7   1    2.96    0.49
  -3   7   1    3.30    0.57
  -3   7   1    2.55    0.38
  -2  -7   1   29.55    1.77
  -2  -7   1   28.99    1.83
   2  -7  -1   30.27    1.87
  -2  -7   1   30.17    1.93
  -2   7   1   30.28    2.45
  -2   7   1   31.47    1.74
  -2   7   1   29.50    1.96
  -1  -7   1   12.66    0.81
   1  -7  -1   13.61    0.83
  -1  -7   1   13.86    0.80
  -1   7   1   13.42    0.77
  -1   7   1   14.49    0.90
   1   7  -1   12.55    0.89
   1   7  -1   11.19    1.12
   0  -7   1    2.90    0.23
   0  -7  -1    2.59    0.23
   0  -7   1    3.77    0.23
   0   7  -1    2.32    0.27
   0   7   1    3.23    0.27
   0   7  -1    3.77    0.31
  -1  -7  -1   11.29    0.64
   1  -7   1   10.34    0.60
  -1  -7  -1   10.23    0.62
   1  -7   1    9.44    0.68
  -1   7  -1    9.75    0.89
   1   7   1    9.50    0.67
  -1   7  -1    9.63    0.69
  -2  -7  -1    1.95    0.33
  -2  -7  -1    2.17    0.18
   2  -7   1    1.90    0.24
  -2  -7  -1    1.86    0.18
  -2   7  -1    2.16    0.39
  -3  -7  -1   20.08    1.20
  -3  -7  -1   19.64    1.65
  -3  -7  -1   18.39    1.26
   3  -7   1   17.05    1.26
  -3  -7  -1   19.54    1.14
  -3   7  -1   19.88    1.33
  -3   7  -1   17.37    1.69
  -4  -7  -1   23.71    1.57
   4  -7   1   21.33    1.65
  -4  -7  -1   26.85    1.68
  -4  -7  -1   27.05    1.50
  -4  -7  -1   23.83    2.17
  -4   7  -1   27.83    1.76
  -4   7  -1   22.88    2.20
  -5  -7  -1    3.75    0.38
  -5  -7  -1    3.88    0.71
  -5  -7  -1    4.36    0.35
  -5  -7  -1    4.09    0.48
   5  -7   1    3.74    0.49
  -5   7  -1    3.66    0.74
  -5   7  -1    3.66    0.53
   6  -7   1   58.56    3.48
  -6  -7  -1   45.67    3.50
  -6  -7  -1   58.16    4.54
  -6   7  -1   50.39    4.55
  -6   7  -1   48.21    3.59
   6   7   1   64.32    3.51
   6   7   1   53.94    3.19
   7  -7   1   -0.04    0.28
  -7  -7  -1   -0.15    0.48
  -7  -7  -1    0.52    0.31
   7   7   1   -0.34    0.28
  -7   7  -1    0.47    0.39
  -7   7  -1    0.82    0.59
   8  -7   1   16.41    1.33
  -8  -7  -1   14.12    1.75
  -8  -7  -1   19.15    1.36
  -8   7  -1   15.90    1.42
  -8   7  -1   14.67    1.82
   8   7   1   17.69    1.36
   9  -7   1    1.96    0.50
  -9  -7  -1    2.94    0.88
   9   7   1    1.06    0.46
  -9   7  -1    2.57    0.89
  -9   7  -1    2.94    0.65
   9  -8  -1    1.31    1.14
  -9  -8   1    0.41    0.42
  -9   8   1    0.62    0.48
   9   8  -1   -0.23    0.97
  -8  -8   1   18.26    1.94
   8  -8  -1   18.56    1.40
  -8  -8   1   18.83    1.45
   8   8  -1   18.61    1.45
  -8   8   1   16.62    1.52
  -7  -8   1    1.13    0.62
   7  -8  -1    1.11    0.34
  -7  -8   1    0.56    0.35
  -7  -8   1    1.20    0.23
  -7   8   1    1.49    0.67
  -7   8   1    1.21    0.46
   7   8  -1    1.54    0.40
   6  -8  -1   48.43    3.08
  -6  -8   1   46.06    2.83
  -6  -8   1   48.55    3.17
  -6  -8   1   46.02    4.04
  -6   8   1   50.18    4.15
  -6   8   1   48.25    3.26
  -5  -8   1    0.46    0.14
  -5  -8   1    0.39    0.13
  -5  -8   1    0.64    0.45
  -5  -8   1    0.57    0.25
   5  -8  -1    0.49    0.23
  -5   8   1    0.49    0.31
  -5   8   1    0.59    0.49
  -4  -8   1    7.09    0.62
  -4  -8   1   10.58    0.62
   4  -8  -1    7.94    0.71
  -4  -8   1    9.67    0.98
  -4  -8   1   11.15    0.77
  -4   8   1    9.47    0.81
  -3  -8   1   12.50    0.78
  -3  -8   1   12.08    0.76
  -3  -8   1   12.86    0.87
  -3  -8   1   11.36    1.12
   3  -8  -1   11.22    0.84
  -3   8   1   11.82    0.94
  -3   8   1   12.08    1.18
   2  -8  -1    1.06    0.15
  -2  -8   1    0.85    0.11
  -2  -8   1    0.88    0.10
  -2   8   1    1.05    0.30
   1  -8  -1   14.65    0.89
  -1  -8   1   15.15    0.85
   1  -8  -1   11.41    1.28
  -1  -8   1   13.43    0.87
  -1   8   1   15.31    0.95
   1   8  -1   13.47    0.94
   0  -8   1   14.07    0.84
   0  -8  -1   12.12    0.83
   0   8  -1   14.98    0.90
   0   8   1   12.76    0.88
  -1  -8  -1    8.83    0.51
   1  -8   1    7.55    0.55
   1  -8   1    8.10    0.48
  -1  -8  -1    7.60    0.50
  -1  -8  -1    7.72    0.67
  -1   8  -1    8.35    0.73
   1   8   1    7.82    0.54
  -1   8  -1    7.60    0.56
  -2  -8  -1    2.05    0.18
  -2  -8  -1    2.07    0.20
   2  -8   1    1.68    0.22
   2   8   1    1.88    0.24
  -2   8  -1    1.84    0.25
  -2   8  -1    2.55    0.40
  -3  -8  -1   29.10    1.78
  -3  -8  -1   26.86    2.27
  -3  -8  -1   26.83    1.63
  -3  -8  -1   26.64    1.70
   3  -8   1   27.60    1.77
  -3   8  -1   27.80    1.84
  -3   8  -1   27.05    2.34
  -4  -8  -1   51.27    3.28
  -4  -8  -1   50.76    3.15
  -4  -8  -1   48.81    4.15
   4  -8   1   54.44    3.24
  -4  -8  -1   50.85    3.01
  -4   8  -1   49.77    4.21
  -4   8  -1   53.48    3.36
  -5  -8  -1    3.82    0.35
  -5  -8  -1    4.47    0.74
  -5  -8  -1    3.71    0.45
  -5  -8  -1    3.34    0.35
   5  -8   1    4.11    0.50
  -5   8  -1    4.09    0.78
  -5   8  -1    3.92    0.53
  -6  -8  -1   38.84    2.34
   6  -8   1   36.17    2.46
  -6  -8  -1   36.75    3.25
  -6  -8  -1   39.19    2.52
  -6   8  -1   37.30    2.60
  -6   8  -1   36.02    3.29
   6   8   1   35.56    2.23
  -7  -8  -1    3.10    0.75
  -7  -8  -1    2.50    0.45
   7  -8   1    2.28    0.46
  -7   8  -1    1.42    0.68
   7   8   1    1.26    0.42
   7   8   1    1.85    0.25
  -7   8  -1    2.36    0.53
  -8  -8  -1    0.61    0.38
   8  -8   1    1.81    0.44
  -8  -8  -1    0.61    0.69
  -8   8  -1    1.07    0.51
  -8   8  -1    1.21    0.74
  -9  -8  -1    1.65    0.76
   9  -8   1    2.05    0.50
   9   8   1    1.60    0.51
  -9   8  -1    0.68    0.51
  -9   8  -1    1.93    0.83
  -9  -9   1    0.61    0.43
   9  -9  -1    1.20    1.18
  -9   9   1    1.62    0.54
   9   9  -1    1.55    1.06
  -8  -9   1    0.97    0.40
  -8   9   1    1.56    0.55
   8   9  -1    0.70    0.38
  -7  -9   1    1.66    0.40
  -7  -9   1    1.81    0.26
   7  -9  -1    1.63    0.38
  -7  -9   1    2.21    0.69
  -7   9   1    2.28    0.79
   7   9  -1    1.78    0.41
  -7   9   1    1.21    0.49
  -6  -9   1   15.09    1.55
  -6  -9   1   14.08    1.15
  -6  -9   1   14.17    0.96
  -6  -9   1   14.81    1.00
   6  -9  -1   16.30    1.15
  -6   9   1   15.15    1.28
  -6   9   1   14.01    1.63
  -5  -9   1    1.00    0.18
  -5  -9   1    0.83    0.28
  -5  -9   1    0.91    0.17
  -5  -9   1    1.57    0.50
   5  -9  -1    0.82    0.25
  -5   9   1    0.57    0.47
  -5   9   1    1.03    0.34
   4  -9  -1   28.59    1.83
  -4  -9   1   28.98    1.88
  -4  -9   1   27.71    1.69
  -4  -9   1   28.50    2.39
  -4  -9   1   27.39    1.75
  -4   9   1   29.26    1.96
  -4   9   1   27.21    2.45
  -3  -9   1    8.74    0.83
  -3  -9   1    7.91    0.54
  -3  -9   1    7.79    0.61
   3  -9  -1    7.73    0.61
  -3  -9   1    7.49    0.54
  -3   9   1    9.20    0.70
  -3   9   1    8.73    0.93
   2  -9  -1    2.33    0.25
  -2  -9   1    3.24    0.22
  -2  -9   1    3.02    0.24
  -2   9   1    2.35    0.31
   2   9  -1    2.16    0.31
  -2   9   1    2.62    0.17
  -2   9   1    2.88    0.44
  -1  -9   1    9.86    0.65
  -1  -9   1   10.56    0.64
   1  -9  -1   10.66    0.67
  -1   9   1   10.86    0.73
   1   9  -1   10.28    0.72
   0  -9  -1   29.77    1.98
   0  -9   1   33.72    1.98
   0   9   1   34.47    2.06
  -1  -9  -1   27.15    1.51
   1  -9   1   28.41    1.54
   1  -9   1   24.06    1.44
  -1  -9  -1   23.70    1.45
  -1  -9  -1   23.88    1.92
  -1   9  -1   22.40    1.97
  -1   9  -1   23.32    1.58
   1   9   1   24.26    1.56
  -2  -9  -1    6.61    0.42
  -2  -9  -1    6.95    0.42
   2  -9   1    5.02    0.47
   2   9   1    6.00    0.48
  -2   9  -1    5.50    0.66
  -2   9  -1    6.10    0.51
  -3  -9  -1    7.40    0.51
   3  -9   1    6.92    0.60
  -3  -9  -1    7.78    0.49
  -3  -9  -1    6.80    0.77
  -3  -9  -1    7.88    0.56
  -3   9  -1    6.04    0.85
  -3   9  -1    6.96    0.61
  -4  -9  -1    3.29    0.35
  -4  -9  -1    2.32    0.51
   4  -9   1    2.55    0.36
  -4  -9  -1    2.03    0.25
  -4   9  -1    3.38    0.61
  -5  -9  -1    0.56    0.17
  -5  -9  -1    1.11    0.26
   5  -9   1    0.46    0.25
  -5  -9  -1    1.99    0.53
  -5   9  -1    0.59    0.33
  -5   9  -1    0.97    0.52
   6  -9   1   28.60    1.78
  -6  -9  -1   24.44    2.32
  -6  -9  -1   22.54    1.75
  -6  -9  -1   25.82    1.63
  -6   9  -1   26.36    2.42
  -6   9  -1   23.89    1.87
  -7  -9  -1    1.23    0.59
   7  -9   1    0.17    0.29
  -7  -9  -1    0.43    0.30
   7   9   1    0.45    0.15
  -7   9  -1   -0.04    0.36
  -7   9  -1   -0.08    0.52
   7   9   1    0.26    0.30
  -8  -9  -1   18.00    1.94
  -8  -9  -1   18.56    1.45
   8  -9   1   18.07    1.44
   8   9   1   17.48    1.47
  -8   9  -1   17.46    2.01
  -8   9  -1   22.81    1.64
  -9  -9  -1    0.56    0.67
   9  -9   1    0.93    0.40
  -9   9  -1    0.23    0.47
  -9   9  -1   -0.63    0.65
   9   9   1    1.05    0.47
   9 -10  -1    0.95    1.26
   9  10  -1    0.28    0.92
  -9  10   1   -0.62    0.42
   8 -10  -1    7.51    0.79
  -8 -10   1    6.90    0.84
   8  10  -1    8.51    0.91
  -8  10   1    8.27    1.01
  -7 -10   1    0.52    0.32
   7 -10  -1    0.69    0.30
  -7 -10   1    0.54    0.54
  -7 -10   1    1.01    0.22
   7  10  -1    0.81    0.34
  -7  10   1    1.05    0.47
  -7  10   1    0.55    0.60
  -6 -10   1    5.40    0.70
   6 -10  -1    9.86    0.76
  -6 -10   1    7.27    0.56
  -6 -10   1    7.76    0.59
  -6 -10   1    8.27    1.08
  -6  10   1    9.23    1.17
  -6  10   1    6.78    0.85
   5 -10  -1   -0.03    0.19
  -5 -10   1    0.92    0.46
  -5 -10   1    0.25    0.21
  -5 -10   1    0.24    0.13
  -5 -10   1    0.09    0.12
  -5  10   1    0.11    0.30
  -5  10   1    0.10    0.42
  -4 -10   1    8.94    0.60
  -4 -10   1    8.25    0.61
  -4 -10   1    9.05    0.72
   4 -10  -1    9.05    0.71
  -4 -10   1    9.39    0.97
  -4  10   1    8.47    0.78
  -4  10   1    9.99    1.09
   3 -10  -1    1.69    0.24
  -3 -10   1    1.50    0.25
  -3 -10   1    1.62    0.18
  -3 -10   1    1.53    0.17
  -3  10   1    1.29    0.40
  -3  10   1    1.84    0.32
  -2 -10   1   21.03    1.30
   2 -10  -1   22.26    1.34
  -2 -10   1   21.21    1.71
  -2 -10   1   20.71    1.27
   2  10  -1   19.03    1.41
  -2  10   1   21.31    1.43
  -2  10   1   21.13    1.78
  -2  10   1   21.75    1.23
  -1 -10   1   18.27    1.09
   1 -10  -1   18.20    1.13
  -1 -10   1   17.47    1.11
   1  10  -1   18.83    1.19
  -1  10   1   17.83    1.19
   0 -10   1   17.30    1.05
   0 -10   1   18.93    1.01
   0 -10  -1   17.30    1.01
   0  10  -1   15.31    1.11
   0  10  -1   18.10    1.33
   0  10   1   14.11    1.10
   1 -10   1   15.08    0.92
  -1 -10  -1   15.09    1.23
  -1 -10  -1   14.41    0.93
   1 -10   1   18.37    1.00
  -1 -10  -1   16.79    0.97
   1  10   1   14.85    1.01
  -1  10  -1   15.03    1.28
  -1  10  -1   14.77    1.03
  -2 -10  -1   38.98    2.17
  -2 -10  -1   37.34    2.25
   2 -10   1   36.20    2.29
  -2  10  -1   36.10    2.97
  -2  10  -1   36.30    2.37
   2  10   1   35.39    2.35
  -3 -10  -1    8.31    0.57
  -3 -10  -1    8.36    0.55
  -3 -10  -1    8.25    0.85
   3 -10   1    8.59    0.66
  -3  10  -1    8.39    0.68
  -3  10  -1    7.95    0.94
  -4 -10  -1   15.54    0.98
  -4 -10  -1   12.79    1.27
  -4 -10  -1   12.92    0.89
  -4 -10  -1   15.35    0.87
   4 -10   1   12.59    0.99
  -4  10  -1   12.13    1.34
  -4  10  -1   11.99    1.04
   5 -10   1    0.08    0.23
  -5 -10  -1    0.51    0.24
  -5 -10  -1    0.60    0.16
  -5 -10  -1    0.81    0.46
  -5 -10  -1    0.62    0.16
  -5  10  -1    0.42    0.31
  -5  10  -1   -0.19    0.41
   6 -10   1    8.04    0.72
  -6 -10  -1    6.04    1.01
  -6 -10  -1    5.52    0.52
  -6 -10  -1    5.59    0.63
  -6  10  -1    6.20    1.06
  -6  10  -1    5.40    0.75
  -7 -10  -1    0.47    0.48
  -7 -10  -1    0.02    0.27
   7 -10   1    0.70    0.34
   7  10   1    0.72    0.18
  -7  10  -1    0.13    0.37
   7  10   1    0.50    0.33
  -7  10  -1    0.45    0.58
  -8 -10  -1    2.17    0.80
  -8  10  -1    1.62    0.55
  -8  10  -1    2.02    0.83
   9 -10   1   -0.24    0.32
  -9 -10  -1    0.96    0.64
  -9  10  -1    0.31    0.45
   9  10   1    0.23    0.43
  -9  10  -1    0.87    0.72
   9 -11  -1    1.37    1.10
  -9  11   1   -0.36    0.44
   9  11  -1    0.58    1.06
  -8 -11   1    4.31    0.66
   8 -11  -1    7.25    0.69
  -8  11   1    3.53    0.74
  -7 -11   1    0.41    0.30
  -7 -11   1    0.06    0.16
   7 -11  -1    0.23    0.25
  -7 -11   1   -0.08    0.52
  -7  11   1    0.11    0.52
  -7  11   1    0.11    0.39
   7  11  -1   -0.01    0.27
   6 -11  -1    0.45    0.26
  -6 -11   1    0.42    0.17
  -6 -11   1    0.45    0.30
  -6 -11   1    0.31    0.48
  -6 -11   1    0.56    0.17
  -6  11   1    0.30    0.37
  -6  11   1    1.15    0.60
  -5 -11   1    5.74    0.87
  -5 -11   1    5.93    0.57
  -5 -11   1    6.03    0.45
  -5 -11   1    4.76    0.44
   5 -11  -1    5.86    0.55
  -5  11   1    5.52    0.95
  -5  11   1    5.71    0.69
  -4 -11   1    3.05    0.54
   4 -11  -1    2.76    0.35
  -4 -11   1    2.78    0.28
  -4  11   1    3.10    0.64
  -4  11   1    2.92    0.45
   3 -11  -1    3.21    0.34
  -3 -11   1    2.95    0.28
  -3 -11   1    3.29    0.26
   3  11  -1    2.79    0.39
  -3  11   1    2.89    0.54
  -3  11   1    2.74    0.39
  -2 -11   1    5.28    0.51
  -2 -11   1    5.66    0.36
   2 -11  -1    4.11    0.38
  -2 -11   1    4.14    0.33
  -2  11   1    6.09    0.49
  -2  11   1    4.63    0.30
  -2  11   1    5.41    0.62
  -1 -11   1    1.08    0.13
   1 -11  -1    1.56    0.16
  -1 -11   1    1.28    0.13
  -1  11   1    1.45    0.20
   1  11  -1    1.24    0.18
   0 -11  -1    4.71    0.30
   0 -11  -1    3.70    0.31
   0 -11   1    5.35    0.31
   0 -11   1    4.77    0.31
   0  11   1    3.99    0.35
   0  11  -1    4.24    0.36
   0  11  -1    4.53    0.39
  -1 -11  -1    0.17    0.10
   1 -11   1    0.07    0.08
   1 -11   1    0.10    0.05
  -1 -11  -1   -0.01    0.06
  -1 -11  -1    0.03    0.05
  -1  11  -1    0.12    0.16
   1  11   1   -0.03    0.08
  -1  11  -1   -0.08    0.10
   2 -11   1   58.70    3.65
  -2 -11  -1   60.65    3.61
  -2 -11  -1   59.80    3.47
  -2 -11  -1   60.20    4.64
   2  11   1   58.45    3.74
  -2  11  -1   59.06    3.77
  -2  11  -1   59.46    4.70
  -3 -11  -1    1.50    0.18
   3 -11   1    1.87    0.27
  -3 -11  -1    1.70    0.19
   3  11   1    1.26    0.26
  -3  11  -1    1.45    0.27
  -3  11  -1    1.83    0.45
  -4 -11  -1   28.46    1.68
  -4 -11  -1   29.31    1.84
  -4 -11  -1   27.73    1.74
  -4 -11  -1   26.62    2.36
   4 -11   1   27.68    1.83
  -4  11  -1   26.91    1.91
  -4  11  -1   27.05    2.45
  -5 -11  -1    3.29    0.43
  -5 -11  -1    3.61    0.35
   5 -11   1    4.23    0.49
  -5 -11  -1    4.99    0.39
  -5 -11  -1    3.48    0.69
  -5  11  -1    3.46    0.55
  -5  11  -1    4.38    0.84
  -6 -11  -1    7.61    1.04
  -6 -11  -1    5.38    0.51
  -6  11  -1    5.78    1.04
   7 -11   1    4.44    0.59
  -7 -11  -1    4.50    0.89
  -7 -11  -1    4.48    0.55
   7  11   1    3.59    0.38
  -7  11  -1    4.02    0.66
  -7  11  -1    3.72    0.91
   8 -11   1    2.10    0.44
  -8 -11  -1    1.96    0.73
   8  11   1    0.58    0.43
  -8  11  -1    2.02    0.82
  -9 -11  -1    0.01    0.65
   9 -11   1    0.21    0.35
  -9  11  -1    0.89    0.53
  -9  11  -1    0.82    0.71
   9  11   1    0.09    0.40
   9 -12  -1   -0.40    1.04
  -9  12   1    0.86    0.51
   9  12  -1    1.01    1.07
   8 -12  -1    1.13    0.33
   8 -12  -1    1.67    1.13
  -8 -12   1    0.02    0.35
   8  12  -1    0.32    0.37
  -8  12   1    0.34    0.47
  -7 -12   1    0.70    0.20
  -7 -12   1    0.02    0.28
   7 -12  -1    0.77    0.30
  -7 -12   1    0.74    0.54
  -7  12   1    0.02    0.36
  -7  12   1    0.36    0.55
  -6 -12   1    5.97    0.51
  -6 -12   1    8.05    0.99
  -6  12   1    5.47    1.01
  -5 -12   1    0.28    0.14
  -5 -12   1    0.16    0.14
   5 -12  -1    0.32    0.22
  -5 -12   1    0.38    0.24
  -5 -12   1    0.29    0.39
  -5  12   1    1.10    0.53
  -5  12   1    0.76    0.32
  -4 -12   1   44.32    3.69
  -4 -12   1   46.17    2.79
   4 -12  -1   45.54    2.86
  -4 -12   1   47.21    2.94
  -4 -12   1   45.43    2.70
  -4  12   1   44.71    3.01
  -4  12   1   44.62    3.78
  -3 -12   1    1.47    0.18
  -3 -12   1    1.67    0.18
   3 -12  -1    1.44    0.22
   3  12  -1    1.76    0.33
  -3  12   1    1.57    0.44
  -3  12   1    1.65    0.31
  -2 -12   1  109.94    6.88
  -2 -12   1  116.73    8.81
  -2 -12   1  114.08    6.62
   2 -12  -1  114.21    6.91
  -2  12   1  114.42    6.59
  -2  12   1  115.24    8.88
   2  12  -1  113.15    7.15
  -2  12   1  117.07    7.16
   1 -12  -1    3.45    0.28
  -1 -12   1    3.49    0.28
  -1 -12   1    3.71    0.27
  -1  12   1    3.97    0.34
   1  12  -1    4.38    0.33
   0 -12  -1    2.13    0.17
   0 -12   1    2.15    0.17
   0 -12  -1    1.26    0.26
   0 -12  -1    1.70    0.17
   0 -12   1    1.79    0.17
   0  12  -1    1.60    0.21
   0  12   1    2.20    0.22
  -1 -12  -1    5.07    0.37
  -1 -12  -1    5.51    0.47
   1 -12   1    5.09    0.35
   1 -12   1    5.37    0.40
  -1 -12  -1    6.44    0.38
  -1  12  -1    5.03    0.55
  -1  12  -1    5.07    0.43
   1  12   1    5.46    0.42
  -2 -12  -1   22.66    1.45
  -2 -12  -1   24.16    1.40
  -2 -12  -1   23.00    1.89
   2 -12   1   23.15    1.49
   2  12   1   24.12    1.52
  -2  12  -1   22.94    1.96
  -2  12  -1   23.09    1.55
  -3 -12  -1    0.24    0.10
  -3 -12  -1   -0.05    0.07
   3 -12   1   -0.03    0.15
  -3  12  -1   -0.11    0.29
   3  12   1   -0.16    0.16
  -3  12  -1    0.05    0.18
  -4 -12  -1   -0.02    0.10
   4 -12   1   -0.03    0.18
  -4 -12  -1    0.03    0.29
  -4  12  -1   -0.14    0.20
  -4  12  -1   -0.17    0.34
  -5 -12  -1    3.56    0.43
   5 -12   1    2.86    0.44
  -5 -12  -1    4.17    0.36
  -5 -12  -1    3.08    0.67
  -5 -12  -1    3.67    0.36
  -5  12  -1    3.91    0.56
  -5  12  -1    3.74    0.76
  -6 -12  -1    0.71    0.19
  -6 -12  -1   -0.23    0.24
  -6 -12  -1    0.81    0.48
   6 -12   1    0.44    0.28
  -6  12  -1    0.08    0.36
  -6  12  -1   -0.21    0.49
  -7 -12  -1   -0.24    0.48
  -7 -12  -1    0.02    0.17
  -7 -12  -1   -0.12    0.29
   7 -12   1    0.45    0.31
   7  12   1    0.12    0.14
  -7  12  -1    0.31    0.40
  -7  12  -1    0.41    0.59
  -8 -12  -1    3.51    0.91
   8 -12   1    4.86    0.64
  -8  12  -1    4.81    1.11
   8  12   1    4.39    0.69
  -8  12  -1    5.38    0.79
  -9 -12  -1    1.11    0.70
   9 -12   1    0.20    0.35
  -9  12  -1    1.94    0.85
  -9  12  -1   -0.08    0.46
   9  12   1   -0.05    0.41
   9 -13  -1    2.06    1.29
   9  13  -1    1.48    1.06
  -9  13   1    1.30    0.55
   8 -13  -1    0.98    0.34
   8 -13  -1   -0.14    0.98
  -8 -13   1   -0.11    0.34
   8  13  -1    0.55    0.93
   8  13  -1    0.48    0.40
  -8  13   1    0.37    0.45
  -7 -13   1    0.67    0.53
  -7 -13   1    0.89    0.23
   7 -13  -1    1.24    0.32
  -7 -13   1    1.04    0.35
  -7 -13   1    1.14    0.22
  -7  13   1    0.51    0.61
  -7  13   1    0.52    0.43
  -6 -13   1    6.78    0.58
  -6 -13   1    7.66    0.59
  -6 -13   1    8.57    1.05
  -6  13   1    8.88    1.14
  -5 -13   1   -0.27    0.22
  -5 -13   1    0.03    0.13
  -5 -13   1   -0.02    0.11
   5 -13  -1    0.02    0.19
  -5 -13   1   -0.32    0.33
  -5  13   1    0.12    0.44
  -5  13   1    0.22    0.31
   4 -13  -1    1.62    0.26
  -4 -13   1    1.16    0.19
  -4 -13   1    1.57    0.19
  -4  13   1    2.31    0.54
  -4  13   1    1.10    0.33
   4  13  -1    1.17    0.33
  -3 -13   1    5.20    0.40
  -3 -13   1    6.09    0.63
  -3 -13   1    5.75    0.42
   3 -13  -1    5.94    0.48
  -3  13   1    5.51    0.54
  -3  13   1    5.83    0.73
   3  13  -1    5.52    0.55
  -2 -13   1    3.18    0.29
  -2 -13   1    2.83    0.24
   2 -13  -1    3.30    0.30
  -2  13   1    2.67    0.20
   2  13  -1    2.83    0.33
  -2  13   1    3.01    0.35
   1 -13  -1    0.77    0.12
  -1 -13   1    0.83    0.12
  -1 -13   1    0.83    0.11
   1  13  -1    0.95    0.17
  -1  13   1    0.76    0.17
   0 -13   1    2.25    0.35
   0 -13  -1    3.54    0.25
   0 -13  -1    3.50    0.25
   0 -13   1    3.99    0.25
   0 -13  -1    2.57    0.37
   0 -13   1    3.24    0.25
   0  13  -1    3.44    0.31
   0  13   1    3.51    0.32
  -1 -13  -1    0.87    0.11
  -1 -13  -1    0.67    0.11
  -1 -13  -1    0.99    0.15
   1 -13   1    0.91    0.13
   1 -13   1    0.82    0.10
  -1  13  -1    0.94    0.18
   1  13   1    0.78    0.16
  -1  13  -1    0.84    0.24
   2 -13   1   61.31    3.74
  -2 -13  -1   60.50    4.74
  -2 -13  -1   58.89    3.56
  -2 -13  -1   60.25    3.70
  -2  13  -1   61.58    4.82
   2  13   1   64.09    3.83
  -2  13  -1   60.00    3.86
   3 -13   1    0.28    0.17
  -3 -13  -1    0.62    0.13
  -3 -13  -1    0.76    0.13
   3  13   1    0.36    0.20
  -3  13  -1    0.40    0.35
  -3  13  -1    0.41    0.20
  -4 -13  -1   24.01    1.42
   4 -13   1   22.75    1.56
  -4 -13  -1   23.58    2.03
  -4 -13  -1   23.15    1.47
  -4  13  -1   23.23    2.09
   4  13   1   22.15    1.61
  -4  13  -1   23.29    1.63
  -5 -13  -1   -0.03    0.12
  -5 -13  -1   -0.16    0.35
  -5 -13  -1    0.01    0.14
   5 -13   1   -0.13    0.21
  -5  13  -1   -0.30    0.26
  -5  13  -1   -0.26    0.44
   6 -13   1    2.11    0.38
  -6 -13  -1    1.77    0.36
  -6 -13  -1    1.92    0.60
  -6 -13  -1    1.48    0.26
  -6  13  -1    2.57    0.77
  -6  13  -1    1.53    0.45
  -7 -13  -1    0.05    0.48
   7 -13   1    0.12    0.28
  -7 -13  -1   -0.01    0.17
  -7 -13  -1    0.51    0.31
   7  13   1    0.36    0.17
  -7  13  -1    0.93    0.61
  -7  13  -1    0.54    0.41
  -8 -13  -1    0.89    0.63
   8 -13   1    1.34    0.38
  -8  13  -1   -0.19    0.44
  -8  13  -1    1.12    0.76
   8  13   1   -0.53    0.36
   9 -13   1    0.70    0.38
  -9 -13  -1    0.34    0.64
   9  13   1    0.36    0.42
  -9  13  -1    0.98    0.50
  -9  13  -1   -0.36    0.73
   9 -14  -1   -0.34    1.05
  -9  14   1   -0.56    0.44
   8 -14  -1    1.34    1.07
  -8 -14   1   -0.77    0.30
   8 -14  -1    0.55    0.30
  -8  14   1    0.65    0.47
   8  14  -1   -0.36    0.37
   8  14  -1    1.87    1.01
  -7 -14   1    1.79    0.63
  -7 -14   1    1.11    0.35
  -7 -14   1    0.93    0.21
   7 -14  -1    1.51    0.34
  -7 -14   1    0.55    0.22
  -7  14   1    0.01    0.41
  -6 -14   1    2.19    0.29
  -6 -14   1    2.88    0.45
  -6 -14   1    2.62    0.31
  -6 -14   1    2.52    0.65
   6 -14  -1    2.92    0.42
  -6  14   1    2.57    0.56
  -6  14   1    2.67    0.77
  -5 -14   1    1.82    0.24
  -5 -14   1    2.09    0.55
   5 -14  -1    2.19    0.34
  -5 -14   1    2.14    0.26
  -5  14   1    2.29    0.63
  -5  14   1    1.89    0.45
  -4 -14   1    8.26    0.59
   4 -14  -1    8.74    0.66
  -4  14   1    8.20    0.75
   4  14  -1    7.56    0.76
  -4  14   1    8.26    1.04
   3 -14  -1    0.78    0.18
  -3 -14   1    0.79    0.12
  -3 -14   1    0.85    0.14
  -3 -14   1    1.01    0.28
  -3  14   1    0.61    0.23
   3  14  -1    0.65    0.25
  -3  14   1    0.86    0.37
  -2 -14   1   45.71    2.72
  -2 -14   1   45.75    2.81
   2 -14  -1   46.30    2.84
   2  14  -1   49.11    2.96
  -2  14   1   46.26    2.98
  -2  14   1   44.61    2.68
  -1 -14   1    0.93    0.12
   1 -14  -1    0.81    0.12
  -1 -14   1    0.57    0.12
   1  14  -1    0.85    0.18
  -1  14   1    0.73    0.18
   0 -14  -1   32.16    1.82
   0 -14   1   30.33    1.90
   0 -14   1   32.64    1.82
   0  14   1   29.72    1.98
   0  14  -1   29.45    1.99
   1 -14   1    4.66    0.34
  -1 -14  -1    5.76    0.36
  -1 -14  -1    4.69    0.36
  -1 -14  -1    5.20    0.44
   1 -14   1    5.26    0.38
  -1  14  -1    4.59    0.52
  -1  14  -1    4.59    0.42
   1  14   1    5.12    0.42
   2 -14   1    0.05    0.12
  -2 -14  -1    0.10    0.09
  -2 -14  -1   -0.08    0.17
  -2 -14  -1   -0.02    0.07
  -2  14  -1   -0.03    0.15
   2  14   1   -0.04    0.13
  -2  14  -1   -0.04    0.25
  -3 -14  -1    9.30    0.65
   3 -14   1   10.38    0.74
  -3 -14  -1    9.78    0.64
  -3 -14  -1    9.71    0.93
   3  14   1    9.66    0.74
  -3  14  -1    9.64    0.78
  -3  14  -1    9.65    1.01
  -4 -14  -1   -0.02    0.11
   4 -14   1    0.08    0.17
  -4 -14  -1    0.03    0.10
  -4  14  -1    0.21    0.38
   4  14   1   -0.10    0.20
  -4  14  -1   -0.21    0.19
   5 -14   1    4.74    0.54
  -5 -14  -1    4.77    0.43
  -5 -14  -1    4.87    0.43
  -5 -14  -1    6.62    0.86
  -5  14  -1    5.47    0.66
   5  14   1    4.17    0.58
  -5  14  -1    5.52    0.91
  -6 -14  -1    0.65    0.49
  -6 -14  -1    0.59    0.18
   6 -14   1    0.98    0.30
  -6  14  -1    1.81    0.66
  -6  14  -1   -0.07    0.31
  -7 -14  -1    1.41    0.26
  -7 -14  -1    0.92    0.58
   7 -14   1    0.85    0.34
  -7  14  -1    0.76    0.62
  -7  14  -1    1.12    0.44
   7  14   1    1.02    0.21
  -8 -14  -1    1.25    0.65
   8 -14   1    0.98    0.37
  -8  14  -1    0.44    0.47
  -8  14  -1    0.80    0.72
   8  14   1    1.12    0.47
  -9 -14  -1    1.51    0.74
   9 -14   1    1.54    0.44
  -9  14  -1    0.98    0.77
  -9  14  -1    0.71    0.53
   9 -15  -1    0.68    1.12
  -9  15   1    0.97    0.56
   8 -15  -1    0.57    0.29
   8 -15  -1   -0.09    0.97
  -8  15   1    0.20    0.42
   8  15  -1    1.49    0.92
  -7 -15   1    0.76    0.20
  -7 -15   1    0.61    0.20
   7 -15  -1    1.20    0.32
  -7  15   1    0.56    0.41
  -6 -15   1    2.59    0.66
   6 -15  -1    2.42    0.38
  -6 -15   1    1.90    0.27
  -6 -15   1    1.98    0.27
  -6  15   1    2.72    0.74
  -6  15   1    2.00    0.48
  -5 -15   1    0.24    0.12
  -5 -15   1    0.08    0.15
  -5 -15   1    0.01    0.39
   5 -15  -1   -0.04    0.18
  -5  15   1   -0.17    0.27
  -5  15   1    0.27    0.47
   5  15  -1    0.12    0.31
   4 -15  -1    0.17    0.17
  -4 -15   1    0.65    0.16
  -4  15   1    0.62    0.29
   4  15  -1    0.00    0.25
  -4  15   1   -0.13    0.38
  -3 -15   1    3.48    0.30
   3 -15  -1    3.30    0.36
  -3 -15   1    3.41    0.31
  -3 -15   1    3.83    0.48
  -3  15   1    3.97    0.46
  -3  15   1    4.25    0.62
   3  15  -1    4.07    0.45
  -2 -15   1    6.91    0.47
   2 -15  -1    7.05    0.50
   2 -15  -1    6.33    0.96
  -2 -15   1    6.88    0.48
   2  15  -1    7.33    0.56
   2  15  -1    5.20    0.71
  -2  15   1    6.82    0.42
  -2  15   1    7.18    0.60
  -1 -15   1    1.14    0.14
  -1 -15   1    1.08    0.15
   1 -15  -1    1.07    0.15
  -1  15   1    1.26    0.22
   1  15  -1    0.93    0.20
   0 -15  -1    1.86    0.20
   0 -15   1    1.95    0.19
   0 -15   1    2.10    0.21
   0 -15  -1    2.86    0.21
   0 -15  -1    1.58    0.28
   0  15  -1    2.18    0.28
   0  15   1    2.26    0.27
   1 -15   1    0.85    0.11
  -1 -15  -1    1.02    0.13
  -1 -15  -1    1.05    0.16
   1 -15   1    0.87    0.15
  -1 -15  -1    1.10    0.14
  -1  15  -1    0.96    0.26
  -1  15  -1    1.01    0.20
   1  15   1    0.98    0.20
   2 -15   1   33.13    2.10
  -2 -15  -1   32.78    2.00
  -2 -15  -1   33.71    2.07
  -2 -15  -1   33.36    2.66
  -2  15  -1   33.85    2.75
   2  15   1   34.84    2.16
  -2  15  -1   33.87    2.20
  -3 -15  -1    1.14    0.32
  -3 -15  -1    0.89    0.16
   3 -15   1    1.11    0.21
  -3 -15  -1    0.76    0.13
  -3  15  -1    0.85    0.25
   3  15   1    0.91    0.22
  -3  15  -1    1.23    0.41
  -4 -15  -1    5.33    0.44
  -4 -15  -1    5.31    0.43
   4 -15   1    5.31    0.53
  -4  15  -1    5.75    0.57
   4  15   1    5.02    0.54
  -4  15  -1    5.99    0.87
  -5 -15  -1    1.35    0.22
   5 -15   1    1.04    0.29
  -5 -15  -1    1.27    0.22
  -5 -15  -1    1.62    0.51
  -5  15  -1    1.93    0.61
   5  15   1    1.31    0.38
  -5  15  -1    1.66    0.38
  -6 -15  -1    1.40    0.55
  -6 -15  -1    0.72    0.18
   6 -15   1    0.85    0.30
   6  15   1   -0.02    0.31
  -6  15  -1    0.28    0.34
  -6  15  -1    0.90    0.55
  -7 -15  -1    0.21    0.17
   7 -15   1    0.97    0.32
  -7 -15  -1    0.47    0.51
   7  15   1    0.39    0.18
  -7  15  -1    0.31    0.36
   7  15   1    0.88    0.40
  -7  15  -1    0.44    0.58
   8 -15   1    0.21    0.31
  -8 -15  -1    0.12    0.58
   8  15   1    0.02    0.38
  -8  15  -1   -0.30    0.63
  -8  15  -1    0.24    0.42
   9 -15   1    0.73    0.38
  -9  15  -1   -0.32    0.46
   9 -16  -1    0.88    1.14
  -9  16   1    0.24    0.51
   8 -16  -1    0.81    0.33
   8 -16  -1    0.38    1.01
  -8  16   1    0.24    0.42
   8  16  -1    0.08    0.41
   7 -16  -1    1.07    0.31
  -7 -16   1    0.88    0.23
  -7 -16   1    0.60    0.20
  -7  16   1    1.29    0.47
   7  16  -1    0.80    0.45
  -6 -16   1    1.99    0.58
  -6 -16   1    0.94    0.21
   6 -16  -1    1.27    0.30
  -6 -16   1    1.15    0.21
  -6  16   1    0.43    0.36
   6  16  -1    0.97    0.43
  -6  16   1    1.77    0.65
  -5 -16   1    0.15    0.15
   5 -16  -1   -0.01    0.18
  -5 -16   1    0.19    0.13
  -5  16   1    0.35    0.31
  -5  16   1    0.07    0.43
   5  16  -1    0.19    0.32
  -4 -16   1    0.74    0.17
  -4 -16   1    0.76    0.36
   4 -16  -1    0.63    0.20
  -4 -16   1    0.92    0.15
   4  16  -1    0.30    0.28
  -4  16   1    0.50    0.27
  -4  16   1    0.75    0.44
  -3 -16   1    0.76    0.26
  -3 -16   1    0.72    0.12
   3 -16  -1    0.47    0.16
   3  16  -1    0.94    0.26
  -3  16   1    0.92    0.27
   2 -16  -1    0.28    0.11
  -2 -16   1    0.31    0.09
  -2 -16   1    0.19    0.11
   2 -16  -1    0.20    0.44
   2  16  -1    0.40    0.30
  -2  16   1    0.37    0.21
   2  16  -1    0.19    0.17
  -2  16   1    0.31    0.07
   1 -16  -1   28.62    1.86
  -1 -16   1   31.17    1.86
  -1 -16   1   27.98    1.79
  -1  16   1   33.37    1.98
   0 -16  -1   69.50    4.30
   0 -16   1   76.32    4.13
   0 -16   1   72.47    4.30
   0 -16  -1   71.94    4.12
   0  16  -1   62.28    4.46
   0  16   1   72.66    4.46
  -1 -16  -1   16.25    0.92
   1 -16   1   17.12    0.94
  -1 -16  -1   13.48    0.89
  -1 -16  -1   13.42    1.14
   1 -16   1   13.62    0.87
  -1  16  -1   12.21    1.21
  -1  16  -1   14.81    1.01
   1  16   1   14.53    0.99
  -2 -16  -1    0.65    0.12
  -2 -16  -1    0.92    0.23
   2 -16   1    0.63    0.16
  -2 -16  -1    0.73    0.14
  -2  16  -1    0.52    0.19
  -2  16  -1    0.53    0.31
   2  16   1    0.95    0.18
   3 -16   1    0.83    0.20
  -3 -16  -1    0.82    0.16
  -3 -16  -1    0.74    0.27
  -3 -16  -1    1.13    0.15
  -3  16  -1    0.53    0.25
   3  16   1    0.74    0.20
  -3  16  -1    0.44    0.36
   4 -16   1    0.02    0.18
  -4 -16  -1    0.38    0.15
  -4 -16  -1    0.15    0.11
  -4  16  -1    0.33    0.26
   4  16   1    0.25    0.22
  -4  16  -1    0.01    0.34
   5 -16   1    0.38    0.24
  -5 -16  -1    0.57    0.18
  -5 -16  -1    1.77    0.50
  -5 -16  -1    0.86    0.18
  -5  16  -1    0.74    0.49
  -5  16  -1    0.58    0.32
   5  16   1    0.40    0.30
  -6 -16  -1    0.56    0.17
  -6 -16  -1    1.32    0.55
   6 -16   1    1.03    0.30
   6  16   1   -0.02    0.31
  -6  16  -1    1.58    0.64
  -6  16  -1   -0.04    0.32
   7 -16   1    0.48    0.29
  -7 -16  -1    0.13    0.17
  -7 -16  -1    0.50    0.49
  -7  16  -1   -0.74    0.47
   7  16   1   -0.11    0.15
  -7  16  -1   -0.19    0.36
   7  16   1   -0.17    0.35
   8 -16   1    0.35    0.33
  -8 -16  -1    1.32    0.65
  -8  16  -1   -0.35    0.37
   8  16   1   -0.19    0.16
  -8  16  -1    0.30    0.66
   9 -16   1    0.34    0.37
  -9  16  -1   -0.33    0.48
  -9  17   1    0.21    0.45
   8 -17  -1    0.90    0.33
   8 -17  -1    0.41    1.08
   8  17  -1    0.38    0.46
  -8  17   1    0.50    0.46
  -7 -17   1    1.14    0.27
   7 -17  -1    0.40    0.98
  -7 -17   1    1.21    0.23
   7 -17  -1    1.22    0.33
   7  17  -1    0.25    0.80
   7  17  -1    0.43    0.43
  -7  17   1    1.28    0.46
   6 -17  -1    0.30    0.23
  -6 -17   1    0.14    0.14
  -6 -17   1    0.15    0.16
   6  17  -1   -0.02    0.36
  -6  17   1    0.51    0.36
  -5 -17   1    2.88    0.33
  -5 -17   1    3.62    0.33
   5 -17  -1    2.98    0.39
  -5  17   1    2.83    0.70
   5  17  -1    2.88    0.51
  -5  17   1    2.89    0.53
   4 -17  -1   -0.16    0.14
  -4 -17   1    0.30    0.11
  -4 -17   1   -0.56    0.26
  -4 -17   1   -0.03    0.13
  -4  17   1   -0.20    0.22
   4  17  -1   -0.22    0.23
  -4  17   1   -0.15    0.35
  -3 -17   1   20.82    1.33
  -3 -17   1   22.23    1.31
   3 -17  -1   20.17    1.37
   3  17  -1   23.03    1.48
  -3  17   1   20.85    1.50
  -3  17   1   20.65    1.24
   2 -17  -1    0.37    0.12
  -2 -17   1    0.34    0.09
   2 -17  -1   -0.29    0.37
  -2 -17   1    0.12    0.10
  -2  17   1    0.70    0.22
   2  17  -1    0.13    0.24
   2  17  -1    0.39    0.16
  -2  17   1    0.41    0.08
  -1 -17   1    0.38    0.11
   1 -17  -1    0.42    0.11
   1 -17  -1    0.36    0.33
  -1 -17   1    0.53    0.11
  -1  17   1    0.29    0.17
   1  17  -1    0.23    0.18
   0 -17  -1    0.37    0.10
   0 -17   1   -0.03    0.09
   0 -17  -1    0.29    0.09
   0 -17   1    0.20    0.09
   0 -17  -1    0.44    0.17
   0  17  -1    0.26    0.17
  -1 -17  -1   28.33    1.73
   1 -17   1   28.50    1.70
  -1 -17  -1   29.27    2.24
   1  17   1   31.81    1.89
  -1  17  -1   28.93    1.90
  -1  17  -1   26.79    2.31
  -2 -17  -1    1.73    0.27
  -2 -17  -1    1.42    0.17
  -2 -17  -1    1.42    0.19
   2 -17   1    1.30    0.20
  -2  17  -1    1.96    0.29
   2  17   1    1.42    0.22
  -2  17  -1    1.54    0.38
  -3 -17  -1    0.67    0.14
  -3 -17  -1    0.72    0.15
  -3 -17  -1    0.76    0.27
   3 -17   1    0.67    0.19
  -3  17  -1    0.67    0.24
  -3  17  -1    0.17    0.35
   3  17   1    0.82    0.20
   4 -17   1    2.31    0.33
  -4 -17  -1    1.97    0.24
  -4 -17  -1    1.81    0.24
  -4 -17  -1    2.34    0.48
  -4  17  -1    1.97    0.39
   4  17   1    1.70    0.33
  -4  17  -1    2.00    0.56
  -5 -17  -1    4.58    0.43
  -5 -17  -1    4.80    0.40
   5 -17   1    4.64    0.52
  -5  17  -1    4.29    0.84
   5  17   1    4.53    0.58
  -5  17  -1    3.07    0.54
  -6 -17  -1    1.52    0.25
   6 -17   1    1.36    0.33
  -6 -17  -1    1.06    0.55
  -6  17  -1    1.09    0.43
   6  17   1    1.71    0.43
  -6  17  -1    1.30    0.64
   7 -17   1    3.34    0.50
  -7 -17  -1    2.94    0.37
  -7 -17  -1    4.41    0.83
  -7  17  -1    2.62    0.88
   7  17   1    2.69    0.34
  -7  17  -1    2.95    0.59
  -8 -17  -1    0.05    0.21
   8 -17   1   -0.09    0.28
  -8  17  -1    0.63    0.44
   8  17   1    0.21    0.18
  -8  17  -1   -0.08    0.68
   9 -17   1    0.25    0.33
  -9  17  -1   -0.15    0.44
   8 -18  -1    0.34    0.28
   8 -18  -1    1.78    1.22
  -8  18   1    0.44    0.47
   8  18  -1   -0.10    0.18
   7 -18  -1    0.39    0.26
   7 -18  -1    1.47    0.95
  -7 -18   1    0.05    0.17
  -7 -18   1    0.21    0.20
  -7  18   1   -0.04    0.34
   7  18  -1    0.38    0.41
  -6 -18   1    1.90    0.26
  -6 -18   1    1.94    0.26
   6 -18  -1    1.12    0.28
   6  18  -1   -0.04    0.35
  -6  18   1    0.36    0.35
   5 -18  -1    2.93    0.39
  -5 -18   1    2.97    0.33
  -5 -18   1    3.10    0.32
  -5  18   1    3.62    0.56
   5  18  -1    3.04    0.52
   4 -18  -1    6.67    0.58
  -4 -18   1    6.64    0.54
  -4 -18   1    7.84    0.53
   4  18  -1    6.96    0.68
  -4  18   1    6.81    0.69
  -3 -18   1    0.10    0.11
  -3 -18   1    0.36    0.10
   3 -18  -1    0.28    0.13
   3 -18  -1    0.37    0.50
   3  18  -1    0.23    0.20
   3  18  -1   -0.02    0.35
  -3  18   1    0.11    0.05
  -3  18   1    0.47    0.24
   2 -18  -1    2.58    0.26
  -2 -18   1    2.62    0.26
  -2 -18   1    2.58    0.23
  -2  18   1    2.30    0.20
  -2  18   1    2.76    0.36
   2  18  -1    2.24    0.34
   2  18  -1    3.03    0.31
  -1 -18   1   52.85    2.94
  -1 -18   1   46.68    2.82
   1 -18  -1   44.06    2.93
  -1  18   1   41.88    2.80
  -1  18   1   56.05    3.10
   0 -18   1   38.22    2.11
   0 -18   1   35.61    2.20
   0 -18  -1   35.74    2.10
   0 -18  -1   32.09    2.19
   0  18   1   35.54    2.31
   0  18  -1   37.20    2.33
   1 -18   1    6.64    0.48
  -1 -18  -1    6.86    0.52
   1 -18   1    7.33    0.52
  -1 -18  -1    8.65    0.53
   1  18   1    8.90    0.62
  -1  18  -1    6.92    0.60
  -1  18  -1    7.34    0.72
  -2 -18  -1    1.01    0.15
  -2 -18  -1    1.67    0.25
   2 -18   1    1.00    0.18
  -2 -18  -1    1.00    0.17
   2  18   1    1.41    0.23
  -2  18  -1    1.84    0.29
  -2  18  -1    1.47    0.35
  -3 -18  -1    2.82    0.42
   3 -18   1    2.58    0.31
  -3 -18  -1    2.69    0.27
  -3 -18  -1    2.27    0.25
  -3  18  -1    2.30    0.37
   3  18   1    2.49    0.31
  -3  18  -1    3.25    0.57
  -4 -18  -1    3.94    0.57
   4 -18   1    2.71    0.37
  -4 -18  -1    2.88    0.30
  -4 -18  -1    2.79    0.31
  -4  18  -1    2.26    0.42
   4  18   1    2.86    0.39
  -4  18  -1    2.57    0.63
  -5 -18  -1    0.71    0.20
   5 -18   1    0.77    0.27
  -5 -18  -1    1.05    0.20
  -5  18  -1    0.98    0.50
   5  18   1    0.55    0.31
  -5  18  -1    0.94    0.35
   6 -18   1    2.91    0.43
  -6 -18  -1    2.25    0.29
  -6 -18  -1    2.27    0.62
  -6  18  -1    1.21    0.46
   6  18   1    1.78    0.43
  -6  18  -1    1.84    0.74
  -7 -18  -1    0.45    0.20
  -7 -18  -1   -1.15    0.44
   7 -18   1    0.86    0.33
  -7  18  -1   -0.16    0.55
  -7  18  -1    0.45    0.42
   7  18   1    0.28    0.18
  -8 -18  -1    0.96    0.27
   8 -18   1    0.93    0.35
  -8  18  -1    1.85    0.53
   8  18   1    0.88    0.23
  -8  18  -1   -0.05    0.68
   8 -19  -1    0.69    1.14
   8 -19  -1    0.06    0.27
   8  19  -1    0.03    0.20
  -8  19   1    0.24    0.47
  -7 -19   1    0.43    0.22
   7 -19  -1    0.29    0.27
   7 -19  -1    0.40    0.94
  -7 -19   1   -0.04    0.16
  -7  19   1    0.52    0.41
   7  19  -1   -0.05    0.36
  -6 -19   1    0.79    0.21
   6 -19  -1    1.39    0.28
  -6 -19   1    0.90    0.20
   6 -19  -1    1.24    1.02
  -6  19   1    0.82    0.39
   6  19  -1   -0.32    0.35
  -5 -19   1    0.54    0.15
  -5 -19   1    0.11    0.16
   5 -19  -1    0.31    0.21
   5  19  -1   -0.64    0.26
  -5  19   1    0.05    0.27
   4 -19  -1    2.26    0.88
  -4 -19   1    3.46    0.33
  -4 -19   1    3.68    0.36
   4 -19  -1    3.82    0.39
  -4  19   1    3.70    0.52
   4  19  -1    4.23    0.50
   3 -19  -1    0.66    0.56
   3 -19  -1    1.37    0.21
  -3 -19   1    1.47    0.18
  -3 -19   1    1.39    0.20
   3  19  -1    1.22    0.26
   3  19  -1    0.85    0.41
  -3  19   1    1.34    0.13
  -3  19   1    1.18    0.30
  -2 -19   1    4.88    0.40
  -2 -19   1    4.81    0.38
   2 -19  -1    5.21    0.40
  -2  19   1    4.94    0.34
  -2  19   1    5.10    0.52
   2  19  -1    6.22    0.47
  -1 -19   1    3.96    0.31
   1 -19  -1    2.34    0.55
   1 -19  -1    3.51    0.31
  -1 -19   1    3.59    0.32
  -1  19   1    3.16    0.28
  -1  19   1    4.35    0.40
   1  19  -1    4.87    0.42
   0 -19   1    9.98    0.69
   0 -19  -1   10.36    0.70
   0 -19   1   10.92    0.67
   0  19   1   11.01    0.78
   0  19  -1    9.50    0.77
  -1 -19  -1    1.21    0.17
   1 -19   1    1.35    0.15
   1 -19   1    1.30    0.18
  -1 -19  -1    1.34    0.17
  -1  19  -1    1.16    0.24
   1  19   1    1.35    0.23
   2 -19   1   20.22    1.31
  -2 -19  -1   21.39    1.26
  -2 -19  -1   21.28    1.29
  -2 -19  -1   19.79    1.63
  -2  19  -1   19.71    1.41
  -2  19  -1   19.85    1.74
   2  19   1   20.29    1.36
  -3 -19  -1    0.16    0.10
  -3 -19  -1    0.52    0.15
  -3 -19  -1    0.48    0.24
   3 -19   1    0.23    0.15
   3  19   1    0.15    0.16
  -3  19  -1    0.25    0.06
  -3  19  -1    0.08    0.21
  -3  19  -1   -0.09    0.32
  -4 -19  -1    1.34    0.20
   4 -19   1    1.43    0.28
  -4 -19  -1    1.33    0.40
  -4 -19  -1    1.36    0.22
  -4  19  -1    1.30    0.34
   4  19   1    1.31    0.28
  -4  19  -1    1.24    0.50
  -5 -19  -1    0.41    0.17
   5 -19   1    0.17    0.21
  -5 -19  -1    0.39    0.16
  -5  19  -1    0.25    0.30
  -5  19  -1    0.62    0.51
   5  19   1    0.25    0.27
   6 -19   1    0.46    0.27
  -6 -19  -1    0.86    0.21
  -6  19  -1    0.80    0.39
   6  19   1    0.60    0.34
  -6  19  -1    1.57    0.65
  -7 -19  -1    0.40    0.20
   7 -19   1    0.75    0.32
  -7  19  -1    0.15    0.56
   7  19   1    0.60    0.21
  -7  19  -1    0.17    0.40
  -8 -19  -1    0.27    0.22
   8 -19   1    0.07    0.30
  -8  19  -1    0.00    0.67
  -8  19  -1   -0.26    0.41
   8  19   1    0.33    0.20
   8 -20  -1   -0.08    0.28
   8 -20  -1    0.75    1.15
   8  20  -1   -0.01    0.18
  -8  20   1    0.73    0.48
   7 -20  -1    3.82    0.49
  -7 -20   1    3.50    0.40
  -7 -20   1    3.43    0.39
   7 -20  -1    0.39    1.08
   7  20  -1    3.75    0.64
  -7  20   1    2.92    0.63
  -6 -20   1    4.37    0.43
  -6 -20   1    3.60    0.38
   6 -20  -1    3.26    1.17
   6 -20  -1    3.85    0.46
  -6  20   1    2.54    0.56
   6  20  -1    3.47    0.59
   5 -20  -1    2.18    0.95
  -5 -20   1    3.71    0.37
   5 -20  -1    3.78    0.41
  -5 -20   1    3.10    0.34
  -5  20   1    3.09    0.54
   5  20  -1    3.74    0.55
  -4 -20   1    0.79    0.20
   4 -20  -1    1.01    0.22
   4 -20  -1    0.10    0.66
  -4  20   1    1.42    0.37
   4  20  -1    0.72    0.30
   4  20  -1    0.21    0.52
   3 -20  -1    0.15    0.48
   3 -20  -1    0.06    0.12
  -3 -20   1    0.10    0.10
  -3 -20   1    0.02    0.12
  -3  20   1   -0.03    0.22
  -3  20   1    0.03    0.05
   3  20  -1    0.13    0.17
   3  20  -1   -0.04    0.32
  -2 -20   1    7.79    0.52
   2 -20  -1    6.81    0.52
  -2 -20   1    7.14    0.50
  -2  20   1    7.21    0.64
   2  20  -1    7.79    0.59
  -2  20   1    6.72    0.46
   1 -20  -1    1.42    0.47
   1 -20  -1    2.57    0.26
  -1 -20   1    2.72    0.28
  -1 -20   1    2.70    0.26
  -1  20   1    2.90    0.24
   1  20  -1    3.58    0.36
  -1  20   1    3.70    0.36
   0 -20  -1   29.08    1.91
   0 -20   1   32.70    1.83
   0 -20   1   30.64    1.90
   0  20   1   31.40    2.02
   0  20  -1   29.67    2.02
   1 -20   1    0.06    0.07
   1 -20   1   -0.03    0.08
  -1 -20  -1   -0.10    0.10
   1 -20   1    0.01    0.29
  -1 -20  -1    0.05    0.08
   1  20   1    0.06    0.17
  -1  20  -1   -0.06    0.17
  -2 -20  -1    0.83    0.14
  -2 -20  -1    0.39    0.14
   2 -20   1    0.70    0.16
  -2 -20  -1    0.99    0.19
   2  20   1    0.66    0.21
  -2  20  -1    1.07    0.34
  -2  20  -1    0.87    0.24
  -3 -20  -1   10.40    0.69
  -3 -20  -1   10.62    0.92
  -3 -20  -1    9.82    0.68
   3 -20   1   10.06    0.73
   3  20   1   10.45    0.75
  -3  20  -1    9.04    0.60
  -3  20  -1    9.38    0.81
  -3  20  -1   10.35    1.06
  -4 -20  -1    6.94    0.78
  -4 -20  -1    5.97    0.51
  -4 -20  -1    6.19    0.50
   4 -20   1    6.31    0.58
  -4  20  -1    7.24    0.91
   4  20   1    6.61    0.59
  -4  20  -1    6.70    0.68
  -5 -20  -1    4.62    0.72
  -5 -20  -1    4.22    0.40
   5 -20   1    4.11    0.49
  -5 -20  -1    4.17    0.41
   5  20   1    3.61    0.51
  -5  20  -1    3.59    0.59
  -5  20  -1    4.55    0.85
   6 -20   1    1.24    0.31
  -6 -20  -1    0.95    0.22
  -6  20  -1    1.46    0.67
   6  20   1    0.46    0.32
  -6  20  -1    1.19    0.41
  -7 -20  -1    0.77    0.23
   7 -20   1    0.91    0.32
   7  20   1    0.48    0.21
  -7  20  -1    1.21    0.73
  -7  20  -1    0.71    0.42
   8 -20   1    0.20    0.32
  -8 -20  -1    0.29    0.22
   8  20   1   -0.02    0.18
  -8  20  -1    0.55    0.48
   8 -21  -1    0.61    0.31
   8 -21  -1    2.41    1.28
  -8  21   1    0.42    0.47
   8  21  -1    0.34    0.22
  -7 -21   1    0.06    0.22
   7 -21  -1    0.45    0.98
  -7 -21   1   -0.01    0.16
   7 -21  -1    0.52    0.28
   7  21  -1    0.12    0.38
  -7  21   1   -0.10    0.38
   6 -21  -1    3.87    0.45
  -6 -21   1    3.44    0.37
  -6 -21   1    3.44    0.37
   6 -21  -1    1.85    1.06
   6  21  -1    2.92    0.55
  -6  21   1    2.96    0.60
  -5 -21   1    0.57    0.17
   5 -21  -1    0.14    0.79
   5 -21  -1    0.61    0.22
  -5 -21   1    0.51    0.19
  -5  21   1    0.36    0.34
   5  21  -1    0.76    0.34
  -4 -21   1    1.54    0.21
  -4 -21   1    1.67    0.24
   4 -21  -1   -0.51    0.67
   4 -21  -1    1.38    0.24
  -4  21   1    1.49    0.37
   4  21  -1    1.71    0.34
   3 -21  -1    3.47    0.81
  -3 -21   1    3.20    0.32
  -3 -21   1    3.17    0.28
   3 -21  -1    3.27    0.32
  -3  21   1    2.77    0.22
  -3  21   1    2.36    0.41
   3  21  -1    3.16    0.39
  -2 -21   1    8.30    0.58
  -2 -21   1    8.10    0.58
   2 -21  -1    8.48    0.60
   2  21  -1   10.90    0.70
  -2  21   1    8.28    0.72
  -2  21   1    7.78    0.54
  -1 -21   1    0.18    0.10
   1 -21  -1    0.26    0.11
   1 -21  -1    0.34    0.32
  -1 -21   1    0.19    0.11
  -1  21   1    0.21    0.09
   1  21  -1    0.16    0.18
  -1  21   1    0.28    0.19
   0 -21   1   37.08    2.05
   0 -21   1   33.74    2.13
   0 -21  -1   34.40    2.14
   0  21   1   36.15    2.26
   0  21  -1   30.89    2.25
  -1 -21  -1    0.61    0.13
  -1 -21  -1    0.82    0.15
   1 -21   1    0.42    0.12
   1 -21   1    0.60    0.12
   1 -21   1    0.61    0.32
   1  21   1    0.38    0.21
  -1  21  -1    0.56    0.21
  -2 -21  -1    0.10    0.13
   2 -21   1    0.30    0.13
  -2 -21  -1    0.06    0.09
  -2  21  -1    0.20    0.28
   2  21   1    0.22    0.18
  -2  21  -1    0.24    0.08
  -2  21  -1    0.12    0.18
  -3 -21  -1    4.73    0.41
   3 -21   1    4.56    0.42
  -3 -21  -1    4.40    0.39
  -3 -21  -1    5.26    0.54
  -3  21  -1    4.63    0.51
  -3  21  -1    5.21    0.74
   3  21   1    4.39    0.44
  -4 -21  -1    0.16    0.17
   4 -21   1    0.04    0.18
  -4 -21  -1    0.12    0.13
  -4  21  -1   -0.29    0.39
   4  21   1    0.34    0.22
  -4  21  -1    0.30    0.28
  -5 -21  -1   -0.15    0.15
  -5 -21  -1   -0.02    0.14
   5 -21   1   -0.21    0.19
  -5  21  -1    0.30    0.48
   5  21   1   -0.03    0.24
  -5  21  -1    0.21    0.29
   6 -21   1    0.81    0.28
  -6 -21  -1    0.64    0.20
   6  21   1    0.53    0.30
  -6  21  -1   -0.31    0.33
  -6  21  -1    1.63    0.70
   6  21   1    0.62    0.20
   7 -21   1    0.87    0.33
  -7 -21  -1    0.68    0.23
  -7  21  -1    0.57    0.44
  -7  21  -1    0.65    0.65
   7  21   1    0.77    0.23
   8 -21   1    0.04    0.29
  -8 -21  -1    0.56    0.24
   8  21   1    0.12    0.20
  -8  21  -1    0.06    0.41
   8 -22  -1    1.43    0.35
   8 -22  -1    0.51    1.01
  -8  22   1    1.41    0.54
   8  22  -1    1.54    0.29
  -7 -22   1    0.04    0.22
   7 -22  -1    0.09    0.25
  -7 -22   1    0.30    0.18
   7 -22  -1   -0.44    0.80
   7  22  -1    0.87    0.43
  -7  22   1    0.54    0.44
   6 -22  -1    0.45    0.85
  -6 -22   1    0.60    0.21
  -6 -22   1    0.36    0.18
   6 -22  -1    0.71    0.26
  -6  22   1    0.18    0.34
   6  22  -1    0.29    0.37
   5 -22  -1    0.41    0.20
   5 -22  -1    0.04    0.72
  -5 -22   1    0.07    0.16
  -5 -22   1    0.06    0.14
  -5  22   1    0.19    0.31
   5  22  -1    0.56    0.30
  -4 -22   1    8.62    0.62
  -4 -22   1    8.93    0.64
   4 -22  -1    7.27    1.40
   4 -22  -1    8.49    0.66
   4  22  -1    9.45    0.76
  -4  22   1    7.77    0.79
   3 -22  -1    2.94    0.86
  -3 -22   1    5.15    0.43
  -3 -22   1    5.27    0.39
   3 -22  -1    4.41    0.41
  -3  22   1    4.28    0.31
   3  22  -1    4.85    0.46
  -3  22   1    4.42    0.55
   2 -22  -1    0.14    0.11
  -2 -22   1   -0.18    0.10
  -2 -22   1    0.03    0.09
  -2  22   1   -0.04    0.19
   2  22  -1    0.04    0.19
  -2  22   1   -0.03    0.08
  -1 -22   1   22.33    1.54
  -1 -22   1   27.91    1.61
   1 -22  -1   22.45    1.60
  -1  22   1   24.34    1.53
  -1  22   1   28.67    1.74
   1  22  -1   29.77    1.74
   0 -22  -1    1.16    0.17
   0 -22   1    0.88    0.15
   0 -22  -1    0.80    0.15
   0 -22   1    0.86    0.15
   0  22  -1    1.17    0.25
   0  22   1    1.07    0.24
   1 -22   1    0.24    0.30
   1 -22   1    0.23    0.10
  -1 -22  -1    0.26    0.12
   1 -22   1    0.01    0.09
  -1 -22  -1    0.24    0.11
  -1  22  -1    0.63    0.21
   1  22   1    0.14    0.18
  -2 -22  -1   -0.01    0.10
   2 -22   1    0.00    0.11
  -2 -22  -1   -0.15    0.11
  -2  22  -1    0.22    0.21
   2  22   1    0.00    0.17
  -2  22  -1    0.10    0.08
  -3 -22  -1    6.42    0.51
  -3 -22  -1    6.64    0.54
   3 -22   1    6.80    0.55
  -3  22  -1    6.79    0.83
  -3  22  -1    7.22    0.65
   3  22   1    7.17    0.58
   4 -22   1    2.18    0.32
  -4 -22  -1    2.71    0.31
  -4 -22  -1    2.05    0.26
  -4  22  -1    2.26    0.42
   4  22   1    2.25    0.35
  -4  22  -1    1.54    0.57
   5 -22   1    0.25    0.21
  -5 -22  -1    0.01    0.16
  -5 -22  -1   -0.11    0.14
  -5  22  -1   -0.13    0.46
  -5  22  -1   -0.13    0.31
   5  22   1    0.34    0.25
  -6 -22  -1    0.13    0.17
   6 -22   1    0.22    0.25
  -6  22  -1    0.02    0.32
  -6  22  -1   -0.44    0.51
   6  22   1    0.73    0.32
   6  22   1    0.14    0.18
   7 -22   1    1.14    0.36
  -7 -22  -1    1.87    0.30
  -7  22  -1    0.57    0.69
  -7  22  -1    1.01    0.47
   7  22   1    1.35    0.28
   8 -22   1    1.04    0.36
  -8 -22  -1    0.96    0.28
   8 -22   1    0.96    1.15
  -8  22  -1    0.91    0.52
   8  22   1    0.71    0.24
   8 -23  -1    1.02    0.33
   8 -23  -1    3.36    1.30
   8  23  -1    0.83    0.26
  -8  23   1    1.09    0.55
   7 -23  -1    1.12    1.10
   7 -23  -1    1.89    0.37
  -7 -23   1    2.45    0.35
  -7 -23   1    2.07    0.31
   7  23  -1    2.73    0.57
  -7  23   1    2.69    0.60
   6 -23  -1    1.43    0.30
  -6 -23   1    1.80    0.29
  -6 -23   1    2.03    0.28
   6 -23  -1   -0.62    0.77
  -6  23   1    0.64    0.42
   6  23  -1    1.24    0.40
  -5 -23   1   -0.05    0.17
  -5 -23   1    0.07    0.14
   5 -23  -1    0.99    0.83
   5 -23  -1    0.27    0.18
   5  23  -1    0.52    0.29
  -5  23   1    0.08    0.29
  -4 -23   1    2.45    0.27
   4 -23  -1    2.79    0.90
  -4 -23   1    2.11    0.29
   4 -23  -1    2.77    0.32
  -4  23   1    1.98    0.44
   4  23  -1    2.48    0.39
  -3 -23   1   21.62    1.34
  -3 -23   1   22.90    1.37
   3 -23  -1   20.51    1.38
   3 -23  -1   15.53    2.04
  -3  23   1   21.16    1.54
   3  23  -1   23.85    1.48
  -2 -23   1    6.10    0.48
   2 -23  -1    4.68    0.88
   2 -23  -1    5.54    0.46
  -2 -23   1    6.60    0.46
   2  23  -1    6.84    0.55
  -2  23   1    5.78    0.41
  -2  23   1    6.42    0.61
  -1 -23   1    0.32    0.11
  -1 -23   1    0.17    0.12
   1 -23  -1    0.30    0.11
   1 -23  -1    0.21    0.32
  -1  23   1    0.11    0.09
  -1  23   1    0.14    0.19
   1  23  -1    0.21    0.19
   0 -23   1    1.89    0.23
   0 -23  -1    2.04    0.24
   0 -23   1    2.54    0.23
   0 -23  -1    1.76    0.22
   0  23   1    2.54    0.34
   0  23  -1    2.09    0.34
   0  23   1    2.57    0.25
  -1 -23  -1   37.70    2.02
   1 -23   1   35.70    2.01
   1 -23   1   29.33    1.91
  -1 -23  -1   28.84    1.92
  -1  23  -1   29.32    2.13
   2 -23   1    1.20    0.19
  -2 -23  -1    1.30    0.19
  -2 -23  -1    1.37    0.21
  -2  23  -1    1.33    0.16
  -2  23  -1    1.50    0.32
   2  23   1    1.54    0.27
  -3 -23  -1    1.99    0.28
  -3 -23  -1    2.20    0.25
   3 -23   1    1.92    0.28
  -3  23  -1    2.51    0.42
   3  23   1    2.13    0.33
  -3  23  -1    1.96    0.51
  -4 -23  -1    0.05    0.16
   4 -23   1   -0.30    0.16
  -4 -23  -1    0.06    0.13
   4  23   1    0.11    0.21
  -4  23  -1   -0.11    0.39
  -4  23  -1    0.15    0.26
  -5 -23  -1    9.17    0.68
   5 -23   1    8.82    0.73
  -5 -23  -1    8.85    0.67
  -5  23  -1    8.99    1.12
   5  23   1    9.09    0.77
  -5  23  -1    8.14    0.86
  -6 -23  -1    0.97    0.23
   6 -23   1    1.22    0.31
   6  23   1    0.70    0.32
   6  23   1    0.62    0.21
  -6  23  -1    0.22    0.38
  -6  23  -1    1.21    0.60
   7 -23   1    3.46    0.49
  -7 -23  -1    2.88    0.38
  -7  23  -1    2.62    0.62
   7  23   1    3.25    0.39
  -8 -23  -1    0.30    0.23
   8 -23   1    0.08    0.29
   8 -23   1    1.78    1.12
   8  23   1    0.06    0.20
  -8  23  -1   -0.01    0.41
   8 -24  -1    1.32    1.15
   8 -24  -1    0.31    0.27
  -8  24   1   -0.10    0.42
   8  24  -1    0.18    0.21
   7 -24  -1    1.74    1.05
  -7 -24   1    0.41    0.23
  -7 -24   1    0.30    0.20
   7 -24  -1    0.63    0.27
  -7  24   1    0.78    0.44
   7  24  -1    0.27    0.37
   6 -24  -1    2.06    0.32
  -6 -24   1    2.47    0.32
  -6 -24   1    2.43    0.30
   6 -24  -1    0.89    0.91
   6  24  -1    0.78    0.37
  -6  24   1    0.78    0.45
   5 -24  -1    2.03    0.31
  -5 -24   1    2.05    0.29
  -5 -24   1    2.33    0.28
   5 -24  -1    2.09    0.95
   5  24  -1    2.51    0.43
  -5  24   1    1.84    0.48
   4 -24  -1    0.14    0.15
  -4 -24   1   -0.12    0.15
  -4 -24   1    0.24    0.13
   4 -24  -1   -0.14    0.61
  -4  24   1    0.28    0.30
   4  24  -1    0.25    0.24
  -3 -24   1    0.10    0.12
   3 -24  -1    0.30    0.14
  -3 -24   1   -0.28    0.13
   3 -24  -1    0.98    0.57
  -3  24   1    0.37    0.28
   3  24  -1    0.19    0.22
  -2 -24   1    2.49    0.29
   2 -24  -1    2.14    0.62
  -2 -24   1    2.77    0.29
   2 -24  -1    3.16    0.30
   2  24  -1    2.97    0.38
  -2  24   1    2.84    0.25
  -2  24   1    3.13    0.43
  -1 -24   1   29.61    1.82
   1 -24  -1   26.69    1.88
  -1 -24   1   30.36    1.89
  -1  24   1   30.84    1.80
   1  24  -1   32.70    2.03
  -1  24   1   31.93    2.04
   0 -24   1   -0.02    0.10
   0 -24   1   -0.15    0.09
   0 -24  -1    0.06    0.10
   0  24   1    0.10    0.21
   0  24  -1    0.08    0.19
   0  24   1   -0.03    0.10
  -1 -24  -1    6.26    0.47
   1 -24   1    4.70    0.72
   1 -24   1    6.61    0.47
  -1 -24  -1    6.48    0.47
   1 -24   1    5.56    0.44
  -1  24  -1    5.88    0.57
   1  24   1    8.14    0.60
  -2 -24  -1    6.63    0.52
   2 -24   1    5.88    0.95
  -2 -24  -1    7.12    0.52
   2 -24   1    6.43    0.51
  -2  24  -1    7.78    0.67
   2  24   1    7.33    0.61
  -2  24  -1    6.53    0.46
   3 -24   1    8.85    0.68
  -3 -24  -1    9.55    0.65
  -3 -24  -1    8.93    0.67
  -3  24  -1    7.83    0.78
   3  24   1    9.59    0.73
  -4 -24  -1    1.23    0.25
   4 -24   1    1.56    0.27
  -4 -24  -1    1.83    0.24
   4  24   1    1.69    0.30
  -4  24  -1    1.53    0.55
  -4  24  -1    1.50    0.37
   5 -24   1    1.96    0.33
  -5 -24  -1    1.69    0.27
  -5  24  -1    2.23    0.65
  -5  24  -1    2.15    0.47
   5  24   1    2.32    0.38
  -6 -24  -1    1.26    0.23
  -6  24  -1    1.64    0.64
  -6  24  -1   -0.23    0.35
   6  24   1   -0.31    0.24
  -7 -24  -1    0.97    0.26
   7 -24   1    1.26    0.35
  -7  24  -1    0.19    0.43
   7  24   1    1.27    0.28
   8 -24   1    0.18    0.96
   8 -24   1    0.24    0.29
  -8 -24  -1    0.45    0.25
   8  24   1    0.62    0.24
  -8  24  -1    0.87    0.50
   8 -25  -1    3.46    1.26
   8 -25  -1    0.08    0.25
  -8  25   1    0.10    0.41
   8  25  -1    0.31    0.22
  -7 -25   1    0.62    0.25
   7 -25  -1    3.16    1.18
  -7 -25   1    0.82    0.25
   7 -25  -1    0.94    0.28
  -7  25   1    1.55    0.52
  -6 -25   1    3.90    0.42
   6 -25  -1    4.60    1.19
   6 -25  -1    4.66    0.47
  -6 -25   1    3.59    0.40
   6  25  -1    3.23    0.53
  -6  25   1    2.49    0.58
  -5 -25   1    1.27    0.25
  -5 -25   1    1.57    0.25
   5 -25  -1    0.76    0.82
   5 -25  -1    1.72    0.29
   5  25  -1    2.14    0.39
  -5  25   1    0.82    0.41
  -4 -25   1    1.59    0.25
   4 -25  -1    1.93    0.27
  -4 -25   1    1.97    0.24
   4 -25  -1    0.34    0.67
   4  25  -1    1.57    0.34
  -4  25   1    1.37    0.40
   3 -25  -1   -0.15    0.12
  -3 -25   1   -0.02    0.12
  -3 -25   1    0.04    0.14
   3  25  -1   -0.24    0.21
  -3  25   1    0.15    0.25
  -2 -25   1    4.97    0.40
  -2 -25   1    4.64    0.42
   2 -25  -1    4.92    0.40
   2 -25  -1    3.34    0.78
   2  25  -1    6.17    0.52
  -2  25   1    4.54    0.36
  -2  25   1    4.41    0.54
  -1 -25   1    0.16    0.12
   1 -25  -1    0.26    0.12
  -1 -25   1    0.18    0.12
   1 -25  -1    0.27    0.32
  -1  25   1    0.28    0.12
  -1  25   1    0.42    0.22
   1  25  -1    0.70    0.24
   0 -25   1   -0.04    0.10
   0 -25   1    0.05    0.10
   0 -25  -1    0.11    0.12
   0  25   1   -0.18    0.18
   0  25  -1   -0.22    0.21
   0  25   1    0.18    0.12
  -1 -25  -1    0.09    0.12
   1 -25   1    0.06    0.10
   1 -25   1   -0.12    0.09
  -1 -25  -1    0.18    0.11
   1 -25   1    0.57    0.33
  -1  25  -1    0.22    0.21
   1  25   1   -0.01    0.19
  -2 -25  -1    3.41    0.32
   2 -25   1    2.74    0.31
   2 -25   1    2.19    0.66
  -2 -25  -1    3.24    0.33
  -2  25  -1    3.60    0.47
  -2  25  -1    2.97    0.28
   2  25   1    3.52    0.42
   3 -25   1    1.56    0.24
  -3 -25  -1    1.39    0.24
  -3 -25  -1    1.52    0.22
  -3  25  -1    1.26    0.35
   3  25   1    0.97    0.29
  -4 -25  -1    0.63    0.16
   4 -25   1    0.63    0.22
  -4 -25  -1    0.38    0.18
   4  25   1    0.54    0.25
  -4  25  -1    0.98    0.36
  -5 -25  -1    1.45    0.25
   5 -25   1    1.42    0.29
  -5  25  -1    1.43    0.44
   5  25   1    1.94    0.35
   6 -25   1    1.30    0.31
  -6 -25  -1    0.97    0.22
   6  25   1    1.25    0.25
  -6  25  -1    0.28    0.37
   7 -25   1    0.35    0.87
   7 -25   1   -0.04    0.25
  -7 -25  -1    0.07    0.19
   7  25   1    0.37    0.22
  -7  25  -1   -0.25    0.36
   8 -25   1    2.38    1.22
  -8 -25  -1    0.03    0.21
   8 -25   1    0.96    0.32
   8  25   1    0.13    0.21
  -8  25  -1   -0.14    0.44
   8 -26  -1    0.39    0.27
   8  26  -1    0.19    0.21
  -8  26   1    0.79    0.50
  -7 -26   1    1.99    0.32
   7 -26  -1    1.95    0.35
   7 -26  -1    2.93    1.18
  -7  26   1    1.67    0.54
  -6 -26   1    3.36    0.42
   6 -26  -1    4.52    1.18
  -6 -26   1    3.80    0.41
   6 -26  -1    3.97    0.45
   6  26  -1    4.06    0.57
  -6  26   1    2.94    0.61
   5 -26  -1    0.36    0.19
  -5 -26   1   -0.02    0.17
  -5 -26   1    0.27    0.16
   5 -26  -1    0.28    0.72
  -5  26   1    0.42    0.36
   5  26  -1    0.14    0.27
  -4 -26   1    3.27    0.36
   4 -26  -1    3.39    0.37
  -4 -26   1    4.19    0.37
   4 -26  -1    2.99    0.94
   4  26  -1    4.16    0.48
  -4  26   1    3.69    0.56
   3 -26  -1    0.21    0.14
  -3 -26   1    0.22    0.13
  -3 -26   1    0.18    0.17
  -3  26   1    0.34    0.27
   3  26  -1   -0.04    0.21
   2 -26  -1    3.10    0.70
   2 -26  -1    2.98    0.31
  -2 -26   1    2.49    0.30
  -2 -26   1    3.45    0.31
  -2  26   1    2.87    0.27
  -2  26   1    2.86    0.44
   2  26  -1    2.96    0.41
  -1 -26   1    0.08    0.12
   1 -26  -1    0.52    0.33
   1 -26  -1    0.11    0.12
  -1 -26   1    0.21    0.13
   1  26  -1    0.18    0.23
  -1  26   1    0.00    0.21
  -1  26   1    0.12    0.11
   0 -26   1    3.48    0.33
   0 -26  -1    3.71    0.34
   0 -26   1    3.93    0.33
   0  26   1    3.85    0.34
   0  26   1    3.77    0.44
   0  26  -1    3.24    0.44
  -1 -26  -1    0.06    0.11
   1 -26   1    0.16    0.11
   1 -26   1   -0.06    0.10
  -1  26  -1   -0.06    0.23
   1  26   1   -0.10    0.21
  -2 -26  -1   -0.06    0.11
   2 -26   1   -0.28    0.41
  -2 -26  -1    0.02    0.14
   2 -26   1    0.15    0.13
  -2  26  -1   -0.02    0.10
  -2  26  -1    0.27    0.24
   2  26   1    0.36    0.24
   3 -26   1    2.42    0.30
  -3 -26  -1    3.02    0.30
  -3 -26  -1    2.49    0.31
   3  26   1    2.35    0.38
  -3  26  -1    2.83    0.45
   4 -26   1   -0.02    0.16
  -4 -26  -1    0.24    0.14
  -4 -26  -1    0.07    0.15
   4  26   1    0.20    0.24
  -4  26  -1   -0.39    0.22
  -5 -26  -1    0.99    0.22
   5 -26   1    1.24    0.26
  -5  26  -1    0.24    0.36
   5  26   1    1.44    0.32
  -6 -26  -1    0.90    0.23
   6 -26   1    1.14    0.89
   6 -26   1    0.88    0.28
  -6  26  -1    0.27    0.36
   6  26   1    0.84    0.23
  -7 -26  -1    0.23    0.21
   7 -26   1   -0.31    0.23
   7 -26   1    0.88    0.94
   7  26   1    0.16    0.21
  -7  26  -1    0.11    0.39
   8 -26   1    0.24    0.28
  -8 -26  -1    0.38    0.25
  -8  26  -1    1.42    0.55
   8  26   1    0.99    0.27
   7 -27  -1    0.55    0.85
  -7 -27   1    0.27    0.21
   7 -27  -1    0.49    0.25
  -7  27   1   -0.12    0.39
  -6 -27   1    1.71    0.30
   6 -27  -1    1.15    0.28
   6 -27  -1    1.86    0.95
  -6 -27   1    1.55    0.27
   6  27  -1    0.99    0.38
  -6  27   1    0.48    0.42
  -5 -27   1    2.81    0.32
   5 -27  -1    0.91    0.81
   5 -27  -1    1.90    0.31
  -5 -27   1    2.48    0.33
   5  27  -1    2.56    0.41
  -5  27   1    3.29    0.58
   4 -27  -1    0.54    0.18
   4 -27  -1    0.11    0.65
  -4 -27   1    0.15    0.17
  -4 -27   1    0.21    0.14
  -4  27   1   -0.02    0.28
   4  27  -1    0.29    0.27
   3 -27  -1    2.06    0.26
  -3 -27   1    1.79    0.26
  -3 -27   1    1.98    0.24
  -3  27   1    1.39    0.37
   3  27  -1    1.50    0.35
  -2 -27   1    1.54    0.21
   2 -27  -1    1.41    0.22
   2 -27  -1    1.32    0.59
  -2 -27   1    1.03    0.21
  -2  27   1    1.41    0.18
  -2  27   1    1.35    0.36
   2  27  -1    1.75    0.34
  -1 -27   1    0.47    0.15
  -1 -27   1    0.39    0.15
   1 -27  -1    0.24    0.13
  -1  27   1    0.26    0.26
  -1  27   1    0.65    0.14
   1  27  -1    0.62    0.27
   0 -27  -1    0.75    0.17
   0 -27   1    1.23    0.18
   0 -27   1    1.27    0.20
   0  27  -1    0.97    0.29
   0  27   1    1.03    0.18
   0  27   1    1.24    0.29
   1 -27   1    0.34    0.14
   1 -27   1    0.60    0.14
  -1 -27  -1    0.41    0.14
   1  27   1    0.44    0.25
  -1  27  -1    0.30    0.23
   2 -27   1    0.65    0.50
  -2 -27  -1    0.52    0.18
  -2 -27  -1    0.50    0.16
   2 -27   1    0.20    0.15
  -2  27  -1    0.45    0.27
   2  27   1    0.73    0.27
  -2  27  -1    0.49    0.13
   3 -27   1    1.60    0.25
  -3 -27  -1    1.10    0.21
  -3 -27  -1    1.48    0.25
   3  27   1    1.80    0.34
  -3  27  -1    1.54    0.37
   4 -27   1    1.35    0.70
  -4 -27  -1    2.20    0.28
   4 -27   1    2.16    0.30
   4  27   1    2.21    0.37
  -4  27  -1    2.78    0.50
   5 -27   1    0.12    0.19
  -5 -27  -1   -0.01    0.15
   5  27   1   -0.03    0.25
  -5  27  -1    0.29    0.35
   6 -27   1    1.84    0.33
  -6 -27  -1    1.75    0.29
   6 -27   1    1.58    0.94
   6  27   1    1.57    0.30
  -6  27  -1    1.43    0.49
   7 -27   1    0.80    0.92
   7 -27   1    0.12    0.25
  -7 -27  -1    0.08    0.20
  -7  27  -1    0.02    0.39
   7  27   1    0.00    0.19
   7 -28  -1    0.19    0.22
  -7 -28   1    0.19    0.21
   7 -28  -1    2.83    1.05
  -7  28   1    0.06    0.40
   6 -28  -1    2.17    0.95
  -6 -28   1    0.21    0.23
  -6 -28   1    0.34    0.19
   6 -28  -1    0.43    0.21
  -6  28   1    0.12    0.40
   6  28  -1    0.30    0.32
   5 -28  -1    0.31    0.18
  -5 -28   1    0.33    0.16
   5 -28  -1    0.98    0.78
  -5 -28   1    0.06    0.19
  -5  28   1   -0.01    0.30
   5  28  -1    0.50    0.31
  -4 -28   1   -0.05    0.16
  -4 -28   1   -0.04    0.13
   4 -28  -1   -0.03    0.57
   4 -28  -1    0.30    0.16
  -4  28   1    0.19    0.33
   4  28  -1   -0.18    0.25
   3 -28  -1    1.84    0.26
  -3 -28   1    2.09    0.26
  -3 -28   1    1.82    0.27
  -3  28   1    2.29    0.45
   3  28  -1    2.23    0.39
   2 -28  -1    0.05    0.13
  -2 -28   1    0.05    0.12
  -2 -28   1   -0.05    0.15
  -2  28   1    0.13    0.25
  -2  28   1    0.00    0.11
   2  28  -1   -0.16    0.21
  -1 -28   1    3.84    0.34
   1 -28  -1    2.87    0.33
  -1 -28   1    3.16    0.33
  -1  28   1    3.30    0.46
   1  28  -1    3.76    0.45
  -1  28   1    3.86    0.32
   0 -28  -1    0.58    0.16
   0 -28   1    0.48    0.16
   0 -28   1    0.72    0.15
   0  28   1    0.59    0.16
   0  28  -1    0.27    0.24
   0  28   1    0.68    0.26
  -1 -28  -1   -0.05    0.12
   1 -28   1    0.05    0.13
   1  28   1    0.17    0.15
   1  28   1   -0.18    0.22
  -1  28  -1    0.23    0.25
  -2 -28  -1    4.21    0.39
   2 -28   1    4.91    0.41
  -2  28  -1    4.72    0.56
  -2  28  -1    3.88    0.35
   2  28   1    4.98    0.51
  -3 -28  -1    2.84    0.31
   3 -28   1    2.63    0.32
  -3 -28  -1    3.28    0.35
   3  28   1    3.03    0.42
  -3  28  -1    2.19    0.44
   4 -28   1    0.49    0.18
   4 -28   1    0.77    0.70
  -4 -28  -1    0.25    0.15
   4  28   1    0.02    0.25
  -4  28  -1    0.03    0.28
   5 -28   1    0.11    0.21
  -5 -28  -1    0.70    0.21
   5 -28   1    1.98    0.85
  -5  28  -1   -0.10    0.31
   5  28   1    0.44    0.31
   5  28   1    0.49    0.21
   6 -28   1    5.04    0.52
   6 -28   1    3.70    1.16
  -6 -28  -1    4.47    0.47
  -6  28  -1    4.77    0.75
   6  28   1    4.84    0.49
   7 -28   1    1.76    0.34
  -7 -28  -1    1.45    0.30
   7 -28   1    2.36    1.05
   7  28   1    0.88    0.27
  -7  28  -1    0.25    0.42
   7 -29  -1    1.35    0.29
  -7 -29   1    1.13    0.27
   7 -29  -1    0.58    0.93
  -7  29   1    0.00    0.44
  -6 -29   1    0.23    0.23
   6 -29  -1    1.55    0.92
  -6 -29   1    0.48    0.21
   6 -29  -1    0.59    0.22
   6  29  -1    0.91    0.37
  -6  29   1   -0.01    0.39
  -5 -29   1    0.90    0.20
   5 -29  -1    0.59    0.70
  -5 -29   1    0.49    0.23
   5 -29  -1    0.56    0.21
   5  29  -1    0.38    0.31
  -5  29   1    0.13    0.35
   4 -29  -1    1.56    0.25
  -4 -29   1    1.31    0.26
  -4 -29   1    1.57    0.24
   4 -29  -1    1.07    0.79
  -4  29   1    1.91    0.45
   4  29  -1    1.48    0.34
   3 -29  -1    4.58    0.42
  -3 -29   1    5.39    0.42
  -3 -29   1    4.61    0.44
  -3  29   1    3.53    0.58
   3  29  -1    5.03    0.56
   2 -29  -1    2.52    0.30
  -2 -29   1    3.43    0.32
  -2 -29   1    1.97    0.29
   2  29  -1    2.09    0.40
  -2  29   1    2.58    0.44
  -1 -29   1    1.50    0.22
  -1 -29   1    1.17    0.21
   1 -29  -1    1.17    0.21
  -1  29   1    1.06    0.33
   1  29  -1    0.86    0.29
  -1  29   1    1.00    0.18
   0 -29  -1    1.42    0.22
   0 -29   1    0.98    0.19
   0 -29   1    1.13    0.20
   0  29   1    1.04    0.32
   0  29  -1    1.17    0.31
   0  29   1    1.62    0.22
  -1 -29  -1    7.58    0.58
   1 -29   1    7.36    0.58
   1  29   1    8.08    0.69
   1  29   1    8.36    0.59
  -1  29  -1    7.40    0.71
   2 -29   1    0.61    0.17
  -2 -29  -1    0.44    0.17
   2  29   1    0.36    0.27
  -2  29  -1    0.99    0.33
  -2  29  -1    0.70    0.15
  -3 -29  -1    0.26    0.16
   3 -29   1    0.22    0.15
   3  29   1    0.24    0.27
  -3  29  -1    0.24    0.29
   4 -29   1    1.34    0.25
  -4 -29  -1    1.62    0.25
   4 -29   1    0.62    0.72
  -4  29  -1    1.38    0.43
   4  29   1    1.32    0.34
  -5 -29  -1    2.51    0.34
   5 -29   1    2.61    0.36
   5 -29   1    2.27    0.93
  -5  29  -1    2.04    0.53
   5  29   1    2.20    0.34
   5  29   1    3.60    0.47
  -6 -29  -1    0.22    0.20
   6 -29   1    0.35    0.23
   6 -29   1    1.15    0.95
  -6  29  -1    0.58    0.42
   6  29   1    0.14    0.21
  -7 -29  -1   -0.16    0.20
   7 -29   1    0.24    0.94
   7 -29   1    0.24    0.24
  -7  29  -1   -0.04    0.42
   7  29   1    0.26    0.22
  -7 -30   1    0.40    0.22
   7 -30  -1    0.71    0.93
   7 -30  -1    0.23    0.22
   7  30  -1    0.23    0.22
  -7  30   1   -0.34    0.37
   6 -30  -1    0.80    0.24
   6 -30  -1    3.21    1.02
  -6 -30   1    0.86    0.23
  -6 -30   1    0.57    0.23
  -6  30   1    0.05    0.38
   6  30  -1    0.05    0.33
   5 -30  -1    1.54    0.82
  -5 -30   1    1.58    0.31
   5 -30  -1    1.47    0.27
  -5 -30   1    2.06    0.29
   5  30  -1    1.27    0.37
  -5  30   1    0.72    0.43
   4 -30  -1   -0.11    0.14
  -4 -30   1    0.03    0.18
  -4 -30   1    0.05    0.14
   4 -30  -1    2.42    0.76
   4  30  -1   -0.03    0.27
  -4  30   1    0.52    0.35
   3 -30  -1    0.08    0.14
  -3 -30   1    0.01    0.13
  -3 -30   1    0.07    0.18
   3  30  -1   -0.13    0.26
  -3  30   1   -0.08    0.27
  -2 -30   1    4.17    0.38
   2 -30  -1    4.10    0.38
  -2 -30   1    3.81    0.40
   2  30  -1    4.42    0.53
  -2  30   1    3.98    0.55
  -1 -30   1   14.25    0.89
  -1 -30   1   14.21    0.93
   1 -30  -1   10.72    0.90
  -1  30   1   13.87    0.87
  -1  30   1   12.95    1.06
   1  30  -1   14.72    1.05
   0 -30  -1    0.14    0.14
   0 -30   1    0.00    0.13
   0 -30   1   -0.06    0.14
   0  30   1    0.11    0.14
   0  30   1   -0.01    0.26
   0  30  -1    0.16    0.27
  -1 -30  -1    4.60    0.42
   1 -30   1    5.31    0.43
   1  30   1    5.34    0.56
  -1  30  -1    4.34    0.57
   1  30   1    4.76    0.45
   2 -30   1    2.84    0.32
  -2 -30  -1    3.18    0.34
  -2  30  -1    2.84    0.47
   2  30   1    3.57    0.46
  -2  30  -1    2.92    0.30
   2  30   1    2.82    0.35
  -3 -30  -1    1.64    0.25
   3 -30   1    1.62    0.25
   3  30   1    1.29    0.34
  -3  30  -1    1.75    0.41
   4 -30   1    0.93    0.22
  -4 -30  -1    0.93    0.21
   4  30   1    1.01    0.25
  -4  30  -1    0.82    0.36
   4  30   1    0.98    0.33
  -5 -30  -1    0.25    0.17
   5 -30   1    0.24    0.20
   5 -30   1    0.39    0.70
  -5  30  -1   -0.47    0.29
   5  30   1    0.09    0.20
   5  30   1   -0.28    0.28
   6 -30   1    0.51    0.88
  -6 -30  -1    0.36    0.21
   6 -30   1    0.02    0.21
  -6  30  -1    0.48    0.41
   6  30   1    0.40    0.22
  -7 -30  -1    0.91    0.28
   7 -30   1    1.12    0.30
   7 -30   1    3.92    1.19
  -7  30  -1    0.68    0.48
   7  30   1    0.93    0.26
   7 -31  -1    0.78    0.26
  -7 -31   1    0.89    0.27
   7 -31  -1    3.61    1.11
   7  31  -1    0.82    0.27
  -7  31   1    0.37    0.43
  -6 -31   1    1.77    0.31
  -6 -31   1    1.69    0.31
   6 -31  -1    3.85    1.13
   6 -31  -1    1.57    0.29
  -6  31   1    0.51    0.44
   6  31  -1    1.61    0.43
   5 -31  -1    0.87    0.73
   5 -31  -1    0.80    0.22
  -5 -31   1    0.72    0.25
  -5 -31   1    0.70    0.21
  -5  31   1    0.21    0.37
   5  31  -1    0.88    0.36
   4 -31  -1    2.01    0.30
  -4 -31   1    2.47    0.35
  -4 -31   1    2.80    0.32
  -4  31   1    2.44    0.53
   4  31  -1    2.50    0.44
  -3 -31   1    0.45    0.16
  -3 -31   1    0.17    0.18
   3 -31  -1    0.20    0.16
   3  31  -1    0.15    0.27
  -3  31   1   -0.15    0.28
   2 -31  -1    0.75    0.18
  -2 -31   1    0.42    0.16
  -2 -31   1    0.48    0.21
  -2  31   1    0.34    0.31
   2  31  -1    1.13    0.33
   1 -31  -1    3.21    0.36
  -1 -31   1    3.52    0.36
  -1 -31   1    3.38    0.35
   1  31  -1    3.16    0.46
  -1  31   1    4.20    0.36
  -1  31   1    2.92    0.46
   0 -31  -1    0.98    0.22
   0 -31   1    1.71    0.25
   0 -31   1    1.76    0.24
   0  31   1    1.83    0.24
   0  31   1    1.15    0.35
   0  31  -1    1.40    0.35
   1 -31   1    0.27    0.15
  -1 -31  -1    0.17    0.15
  -1  31  -1    0.07    0.26
  -1  31  -1    0.16    0.14
   1  31   1    0.18    0.16
   1  31   1    0.04    0.27
   2 -31   1   -0.07    0.13
  -2 -31  -1   -0.05    0.14
   2  31   1   -0.11    0.16
   2  31   1   -0.02    0.24
  -2  31  -1    0.32    0.31
   3 -31   1    0.14    0.16
  -3 -31  -1    0.20    0.15
   3  31   1    0.14    0.17
   3  31   1   -0.14    0.25
  -3  31  -1   -0.42    0.25
  -4 -31  -1    1.30    0.25
   4 -31   1    1.25    0.24
   4  31   1    1.10    0.34
   4  31   1    1.21    0.25
  -4  31  -1    0.98    0.39
   5 -31   1    0.17    0.20
  -5 -31  -1    0.44    0.20
   5  31   1    0.14    0.20
  -5  31  -1    0.79    0.44
   6 -31   1    2.56    0.99
   6 -31   1    0.87    0.26
  -6 -31  -1    0.94    0.26
  -6  31  -1    0.44    0.44
   6  31   1    0.97    0.27
   7 -31   1    0.22    0.24
  -7 -31  -1   -0.09    0.22
   7 -31   1    3.09    1.09
  -7  31  -1    0.46    0.45
   7  31   1    0.61    0.23
   7 -32  -1    0.99    0.26
  -7 -32   1    0.30    0.24
  -7  32   1    0.23    0.43
   7  32  -1    0.54    0.25
   6 -32  -1    0.56    0.22
  -6 -32   1    0.24    0.21
  -6  32   1    0.25    0.44
  -5 -32   1    0.04    0.17
  -5 -32   1   -0.19    0.19
   5 -32  -1    0.27    0.19
  -5  32   1   -0.10    0.36
   5  32  -1   -0.16    0.30
  -4 -32   1   -0.29    0.12
  -4 -32   1    0.06    0.19
   4 -32  -1    0.17    0.16
  -4  32   1   -0.03    0.32
   4  32  -1   -0.14    0.28
   3 -32  -1   -0.04    0.14
  -3 -32   1    0.41    0.16
  -3 -32   1    0.16    0.19
   3  32  -1   -0.34    0.26
  -3  32   1   -0.16    0.28
  -2 -32   1   -0.10    0.17
  -2 -32   1    0.03    0.13
   2 -32  -1   -0.06    0.14
   2  32  -1    0.06    0.26
  -2  32   1   -0.32    0.27
  -1 -32   1   -0.08    0.16
  -1 -32   1    0.05    0.16
   1 -32  -1    0.07    0.15
  -1  32   1   -0.25    0.23
   1  32  -1    0.01    0.25
  -1  32   1    0.13    0.14
   0 -32   1    3.33    0.34
   0 -32   1    3.58    0.33
   0 -32  -1    2.54    0.33
   0  32  -1    3.25    0.49
   0  32   1    2.85    0.45
   0  32   1    2.88    0.32
   1 -32   1    0.04    0.14
  -1 -32  -1   -0.01    0.14
   1  32   1    0.05    0.16
  -1  32  -1    0.07    0.13
  -1  32  -1    0.23    0.28
   1  32   1    0.30    0.29
  -2 -32  -1    1.98    0.27
   2 -32   1    1.57    0.25
   2  32   1    1.71    0.28
   2  32   1    2.54    0.42
  -2  32  -1    2.00    0.42
  -3 -32  -1    1.88    0.27
   3 -32   1    1.35    0.25
   3  32   1    1.31    0.28
  -3  32  -1    1.53    0.41
   3  32   1    1.38    0.37
   4 -32   1    0.30    0.17
  -4 -32  -1    0.12    0.17
  -4  32  -1    0.43    0.35
   4  32   1    0.56    0.31
   4  32   1   -0.14    0.18
  -5 -32  -1    2.06    0.31
   5 -32   1    2.10    0.31
   5  32   1    1.75    0.31
  -5  32  -1    1.48    0.48
  -6 -32  -1    0.02    0.19
   6 -32   1    0.53    0.24
  -6  32  -1   -0.50    0.34
   6  32   1    0.21    0.22
   7 -32   1    0.08    0.22
  -7 -32  -1    0.08    0.22
   7  32   1   -0.41    0.18
   6 -33  -1   -0.08    0.18
  -6 -33   1   -0.03    0.19
  -6  33   1   -0.32    0.35
  -5 -33   1    0.19    0.21
   5 -33  -1    0.97    0.23
  -5 -33   1    0.83    0.23
   5  33  -1    0.02    0.33
  -5  33   1    0.23    0.38
  -4 -33   1    0.15    0.16
  -4 -33   1    0.28    0.21
   4 -33  -1    0.10    0.16
   4  33  -1    0.41    0.31
  -4  33   1    0.27    0.36
  -3 -33   1   -0.17    0.13
   3 -33  -1    0.24    0.16
  -3 -33   1    0.15    0.19
   3  33  -1   -0.19    0.29
  -3  33   1   -0.20    0.28
  -2 -33   1   -0.22    0.17
   2 -33  -1    0.10    0.15
  -2 -33   1    0.10    0.14
   2  33  -1    0.07    0.30
  -2  33   1    0.60    0.32
  -1 -33   1    0.47    0.18
   1 -33  -1    0.50    0.19
  -1 -33   1    0.57    0.19
  -1  33   1    0.64    0.17
  -1  33   1    0.97    0.35
   1  33  -1    0.61    0.32
   0 -33  -1    2.60    0.32
   0 -33   1    2.45    0.31
   0  33   1    2.38    0.29
   0  33  -1    3.09    0.46
   0  33   1    2.02    0.41
  -1 -33  -1    0.95    0.21
   1 -33   1    0.65    0.19
  -1  33  -1    0.75    0.18
   1  33   1    1.89    0.37
  -1  33  -1    1.16    0.34
   1  33   1    0.86    0.21
   2 -33   1    3.27    0.33
  -2 -33  -1    2.75    0.33
  -2  33  -1    2.74    0.50
   2  33   1    2.60    0.45
   2  33   1    2.27    0.33
   3 -33   1   -0.06    0.14
  -3 -33  -1    0.04    0.16
  -3  33  -1    0.34    0.33
   3  33   1    0.12    0.28
   3  33   1   -0.10    0.16
   4 -33   1    0.34    0.19
  -4 -33  -1    0.40    0.20
  -4  33  -1    0.63    0.37
   4  33   1    0.32    0.31
   4  33   1    0.43    0.21
  -5 -33  -1    0.65    0.22
   5 -33   1    0.59    0.23
  -5  33  -1    0.34    0.40
   5  33   1    0.74    0.25
  -6 -33  -1   -0.06    0.20
   6 -33   1    0.11    0.21
   6  33   1    0.35    0.22
  -6  33  -1    0.57    0.46
   6 -34  -1    0.29    0.21
  -6 -34   1    0.80    0.25
  -6  34   1    0.06    0.42
   5 -34  -1    0.46    0.20
  -5 -34   1    0.06    0.19
  -5 -34   1    0.01    0.20
   5  34  -1    0.47    0.36
  -5  34   1    0.32    0.39
  -4 -34   1    2.24    0.35
   4 -34  -1    2.00    0.29
  -4 -34   1    2.21    0.30
  -4  34   1    1.22    0.45
   4  34  -1    1.61    0.41
  -3 -34   1   -0.10    0.15
   3 -34  -1    0.06    0.16
  -3 -34   1   -0.01    0.19
   3  34  -1   -0.45    0.25
  -3  34   1   -0.28    0.31
   2 -34  -1    5.37    0.48
  -2 -34   1    4.88    0.49
  -2 -34   1    6.12    0.49
   2  34  -1    5.96    0.65
  -2  34   1    6.94    0.71
  -1 -34   1    1.55    0.25
  -1 -34   1    2.07    0.27
   1 -34  -1    1.17    0.24
   1  34  -1    1.72    0.41
  -1  34   1    1.62    0.41
  -1  34   1    1.21    0.21
   0 -34  -1    0.03    0.15
   0 -34   1    0.42    0.18
   0  34  -1   -0.02    0.30
   0  34   1    0.08    0.16
   0  34   1    0.10    0.30
   1 -34   1    2.69    0.32
  -1 -34  -1    2.79    0.32
  -1  34  -1    2.01    0.28
   1  34   1    2.94    0.33
  -1  34  -1    2.19    0.44
   1  34   1    3.17    0.48
   2 -34   1    2.21    0.30
  -2 -34  -1    2.66    0.32
   2  34   1    2.12    0.32
   2  34   1    2.69    0.45
  -2  34  -1    2.16    0.47
  -3 -34  -1    0.12    0.17
   3 -34   1   -0.27    0.14
   3  34   1    0.12    0.18
  -3  34  -1    0.04    0.29
   3  34   1    0.21    0.30
  -4 -34  -1    0.40    0.21
   4 -34   1    0.72    0.22
   4  34   1    0.39    0.22
   4  34   1    0.44    0.32
  -4  34  -1    0.26    0.37
   5 -34   1    0.06    0.19
  -5 -34  -1    0.37    0.21
  -5  34  -1   -0.13    0.36
   5  34   1    0.33    0.22
   6 -34   1    1.07    0.27
  -6 -34  -1    1.00    0.28
  -6  34  -1    0.84    0.47
   6  34   1    1.22    0.28
   6 -35  -1    0.54    0.22
  -6 -35   1    0.35    0.23
  -6  35   1   -0.09    0.43
   6  35  -1    0.18    0.23
  -5 -35   1    0.65    0.22
   5 -35  -1    0.55    0.22
   5  35  -1    0.78    0.39
  -5  35   1    0.38    0.43
  -4 -35   1    0.17    0.22
  -4 -35   1    0.06    0.17
   4 -35  -1    0.05    0.16
  -4  35   1    0.09    0.35
   4  35  -1   -0.92    0.27
  -3 -35   1    0.36    0.22
   3 -35  -1    0.37    0.18
  -3 -35   1    0.45    0.20
  -3  35   1    0.44    0.39
   3  35  -1   -0.02    0.31
   2 -35  -1    0.83    0.20
  -2 -35   1    0.72    0.20
  -2 -35   1    0.74    0.23
  -2  35   1    0.46    0.36
   2  35  -1   -0.09    0.29
  -1 -35   1    0.76    0.20
  -1 -35   1    1.28    0.23
   1 -35  -1    0.51    0.19
   1  35  -1    1.10    0.39
  -1  35   1    0.71    0.18
  -1  35   1    0.16    0.30
   0 -35   1    6.05    0.52
   0 -35  -1    4.95    0.51
   0  35   1    6.28    0.68
   0  35   1    6.98    0.52
   0  35  -1    5.92    0.66
   0  35  -1    7.27    0.54
  -1 -35  -1    2.72    0.34
   1 -35   1    3.53    0.36
  -1  35  -1    3.08    0.50
  -1  35  -1    2.98    0.33
   1  35   1    3.89    0.52
   1  35   1    2.95    0.36
  -2 -35  -1    0.96    0.23
   2 -35   1    0.88    0.23
  -2  35  -1    1.19    0.40
   2  35   1    1.43    0.37
   2  35   1    0.80    0.23
   3 -35   1    0.33    0.18
  -3 -35  -1    0.20    0.18
   3  35   1    0.35    0.31
   3  35   1   -0.03    0.19
  -3  35  -1    0.63    0.36
   4 -35   1    0.68    0.21
  -4 -35  -1    0.78    0.24
   4  35   1    0.90    0.24
   4  35   1    0.42    0.36
  -4  35  -1    0.81    0.40
  -5 -35  -1   -0.02    0.19
   5 -35   1   -0.06    0.18
   5  35   1    0.04    0.21
  -5  35  -1    0.02    0.39
   6 -35   1   -0.13    0.19
  -6 -35  -1   -0.14    0.19
   6  35   1    0.11    0.22
  -6  35  -1    0.69    0.46
  -6 -36   1    0.12    0.22
   6 -36  -1   -0.25    0.19
  -6  36   1    0.47    0.43
   6  36  -1    0.15    0.23
  -5 -36   1    0.65    0.22
   5 -36  -1    0.40    0.20
  -5  36   1    0.78    0.45
   5  36  -1    0.19    0.38
  -4 -36   1    0.90    0.22
  -4 -36   1    0.65    0.24
   4 -36  -1    0.40    0.20
  -4  36   1    0.07    0.35
   4  36  -1    0.63    0.38
  -3 -36   1    1.26    0.28
  -3 -36   1    1.73    0.28
   3 -36  -1    1.64    0.26
   3  36  -1    1.17    0.37
  -3  36   1    1.37    0.44
   2 -36  -1    1.90    0.29
  -2 -36   1    1.53    0.29
  -2 -36   1    2.52    0.31
  -2  36   1    1.66    0.47
   2  36  -1    2.70    0.47
  -1 -36   1    8.13    0.63
   1 -36  -1    6.71    0.62
  -1  36   1    9.30    0.61
   1  36  -1    8.33    0.79
  -1  36   1    7.37    0.78
   0 -36   1    2.52    0.34
   0 -36  -1    3.13    0.36
   0  36  -1    2.50    0.50
   0  36   1    3.01    0.48
   0  36   1    3.01    0.33
   0  36  -1    3.09    0.34
  -1 -36  -1    0.31    0.18
   1 -36   1    0.32    0.18
  -1  36  -1    0.24    0.16
   1  36   1    0.42    0.30
   1  36   1    0.44    0.18
  -1  36  -1    0.19    0.31
  -2 -36  -1    0.22    0.17
   2 -36   1    0.31    0.18
   2  36   1    0.31    0.20
  -2  36  -1    0.12    0.35
   2  36   1    0.26    0.31
   3 -36   1    1.15    0.23
  -3 -36  -1    0.84    0.24
  -3  36  -1    0.89    0.43
   3  36   1    1.18    0.27
   3  36   1    1.63    0.40
   4 -36   1    0.15    0.19
  -4 -36  -1    0.36    0.20
   4  36   1   -0.03    0.31
  -4  36  -1    0.16    0.35
   4  36   1    0.22    0.20
  -5 -36  -1   -0.66    0.16
   5 -36   1   -0.02    0.19
   5  36   1    0.57    0.23
  -5  36  -1    0.46    0.46
  -6 -36  -1   -0.40    0.19
   6 -36   1   -0.24    0.18
   6  36   1    0.14    0.21
  -6  36  -1   -0.59    0.38
  -5 -37   1    0.25    0.18
   5 -37  -1    0.13    0.18
   5  37  -1   -0.04    0.36
  -5  37   1   -0.71    0.37
  -4 -37   1    0.15    0.19
   4 -37  -1    0.19    0.18
  -4  37   1   -0.19    0.34
   4  37  -1   -0.02    0.34
  -3 -37   1    0.69    0.21
  -3 -37   1    0.49    0.22
   3 -37  -1    0.40    0.20
  -3  37   1   -0.11    0.32
   3  37  -1    0.61    0.36
  -2 -37   1    1.05    0.24
   2 -37  -1    1.16    0.24
   2  37  -1    1.39    0.40
  -2  37   1    1.47    0.43
   1 -37  -1    0.33    0.19
  -1 -37   1    0.46    0.19
  -1  37   1    0.53    0.18
  -1  37   1    0.76    0.35
   1  37  -1    0.16    0.31
   0 -37   1    1.16    0.25
   0 -37  -1    0.98    0.23
   0  37   1    1.00    0.36
   0  37   1    1.45    0.25
   0  37  -1    1.54    0.25
   0  37  -1    1.74    0.41
   1 -37   1    0.84    0.22
  -1 -37  -1    0.72    0.21
   1  37   1    0.65    0.21
   1  37   1    0.91    0.37
  -1  37  -1    0.69    0.36
  -1  37  -1    0.48    0.19
  -2 -37  -1    2.21    0.31
   2 -37   1    1.68    0.27
   2  37   1    1.86    0.31
   2  37   1    1.79    0.42
  -2  37  -1    2.29    0.51
   3 -37   1    1.11    0.23
  -3 -37  -1    0.60    0.22
   3  37   1    0.61    0.23
  -3  37  -1    0.37    0.38
   3  37   1    0.16    0.33
   4 -37   1    3.77    0.41
  -4 -37  -1    4.85    0.45
  -4  37  -1    2.21    0.61
   4  37   1    3.57    0.56
   4  37   1    4.19    0.47
   5 -37   1    0.10    0.19
  -5 -37  -1    0.27    0.21
   5  37   1    0.13    0.21
  -5  37  -1   -0.42    0.38
  -5 -38   1    0.45    0.21
   5 -38  -1    0.31    0.21
   5  38  -1    0.37    0.23
  -5  38   1   -0.43    0.38
   5  38  -1    0.37    0.40
   4 -38  -1   -0.06    0.18
   4  38  -1   -0.01    0.35
  -4  38   1    0.04    0.36
  -3 -38   1   -0.19    0.17
   3 -38  -1    0.08    0.17
  -3  38   1    0.38    0.41
   3  38  -1    0.35    0.33
  -2 -38   1    0.07    0.17
   2 -38  -1   -0.08    0.17
   2  38  -1    0.27    0.34
  -2  38   1    0.33    0.34
  -1 -38   1    0.69    0.21
   1 -38  -1    0.36    0.19
   1  38  -1    0.68    0.34
  -1  38   1    0.83    0.37
  -1  38   1    0.72    0.19
   1  38  -1    0.40    0.21
   0 -38  -1    3.86    0.41
   0 -38   1    3.55    0.42
   0  38  -1    3.68    0.40
   0  38  -1    4.04    0.59
   0  38   1    3.90    0.57
   0  38   1    4.29    0.42
   1 -38   1    0.11    0.17
  -1 -38  -1    0.02    0.16
   1  38   1   -0.09    0.30
   1  38   1    0.23    0.19
  -1  38  -1    0.11    0.31
   2 -38   1    4.10    0.42
  -2 -38  -1    4.31    0.45
   2  38   1    3.95    0.44
  -2  38  -1    4.57    0.67
   2  38   1    4.59    0.59
  -3 -38  -1    0.25    0.19
   3 -38   1   -0.01    0.17
   3  38   1   -0.42    0.29
   3  38   1    0.05    0.20
  -3  38  -1   -0.01    0.38
  -4 -38  -1    0.26    0.21
   4 -38   1    0.05    0.18
   4  38   1    0.38    0.23
  -4  38  -1    0.43    0.44
   5 -38   1    0.55    0.22
  -5 -38  -1    0.15    0.22
  -5  38  -1    0.72    0.47
   5  38   1    0.21    0.23
  -5 -39   1    0.87    0.24
   5 -39  -1    0.47    0.22
  -5  39   1    0.14    0.45
   5  39  -1    0.28    0.24
   4 -39  -1   -0.13    0.18
  -4 -39   1   -0.39    0.17
  -4  39   1    0.26    0.42
   4  39  -1   -0.16    0.35
   4  39  -1   -0.26    0.20
  -3 -39   1    1.84    0.30
   3 -39  -1    1.79    0.30
  -3  39   1    2.35    0.54
   3  39  -1    1.42    0.44
   2 -39  -1    0.57    0.21
  -2 -39   1    0.37    0.20
  -2  39   1   -0.11    0.36
   2  39  -1    0.77    0.38
   2  39  -1    0.29    0.22
   1 -39  -1    0.35    0.19
  -1 -39   1    0.49    0.20
  -1  39   1    0.20    0.33
   1  39  -1    0.30    0.20
   1  39  -1    0.42    0.35
   0 -39  -1    0.26    0.19
   0 -39   1    0.14    0.18
   0  39  -1    0.57    0.37
   0  39  -1    0.59    0.21
   0  39   1    0.83    0.20
   0  39   1    0.26    0.34
  -1 -39  -1    1.14    0.24
   1 -39   1    0.98    0.23
  -1  39  -1    0.86    0.41
   1  39   1    0.79    0.23
   1  39   1    1.73    0.43
  -2 -39  -1    0.07    0.18
   2 -39   1   -0.16    0.16
  -2  39  -1    0.04    0.34
   2  39   1    0.35    0.34
   2  39   1    0.19    0.20
   3 -39   1    1.44    0.28
  -3 -39  -1    1.77    0.30
  -3  39  -1    1.66    0.49
   3  39   1    2.11    0.33
   3  39   1    1.24    0.42
  -4 -39  -1    0.75    0.26
   4 -39   1    0.91    0.24
   4  39   1    0.84    0.27
  -4  39  -1    0.63    0.44
  -5 -39  -1    0.20    0.22
   5 -39   1    0.00    0.19
  -5  39  -1    0.42    0.44
   5  39   1    0.03    0.21
  -4 -40   1    1.54    0.29
   4 -40  -1    0.97    0.26
   4  40  -1    1.53    0.32
   4  40  -1    1.06    0.44
  -4  40   1    1.19    0.52
   3 -40  -1    0.19    0.18
  -3 -40   1    0.09    0.19
  -3  40   1    0.20    0.40
   3  40  -1    0.16    0.22
   3  40  -1   -0.62    0.32
  -2 -40   1    0.58    0.22
   2 -40  -1    0.71    0.22
   2  40  -1    0.71    0.24
   2  40  -1    1.22    0.40
  -2  40   1    0.57    0.40
  -1 -40   1    0.95    0.23
   1 -40  -1    1.01    0.25
  -1  40   1    0.93    0.39
   1  40  -1    0.80    0.24
   1  40  -1    0.90    0.41
   0 -40  -1   -0.07    0.17
   0 -40   1    0.09    0.17
   0  40   1    0.00    0.31
   0  40  -1    0.45    0.33
   0  40   1   -0.01    0.18
   0  40  -1   -0.20    0.16
   1 -40   1    0.40    0.19
  -1 -40  -1    0.25    0.19
   1  40   1   -0.28    0.32
   1  40   1    0.39    0.19
  -1  40  -1    0.38    0.37
   2 -40   1    0.22    0.19
  -2 -40  -1   -0.04    0.17
   2  40   1   -0.15    0.32
  -2  40  -1   -0.08    0.34
   2  40   1    0.08    0.19
   3 -40   1   -0.07    0.19
  -3 -40  -1   -0.08    0.18
  -3  40  -1    0.16    0.41
   3  40   1    0.63    0.38
   3  40   1    0.20    0.21
  -4 -40  -1    0.31    0.23
   4 -40   1    0.34    0.21
   4  40   1    0.35    0.23
  -4  40  -1    0.48    0.45
  -4 -41   1    0.21    0.20
   4 -41  -1   -0.07    0.18
  -4  41   1    0.54    0.43
   4  41  -1   -0.02    0.22
   4  41  -1   -0.16    0.36
  -3 -41   1   -0.35    0.17
   3 -41  -1    0.12    0.19
  -3  41   1    0.17    0.38
   3  41  -1   -0.06    0.34
   3  41  -1   -0.19    0.20
  -2 -41   1    0.40    0.21
   2 -41  -1    0.75    0.23
   2  41  -1    0.68    0.24
  -2  41   1    0.21    0.37
   2  41  -1    0.41    0.39
  -1 -41   1    0.23    0.18
   1 -41  -1   -0.08    0.19
  -1  41   1   -0.07    0.32
   1  41  -1   -0.21    0.33
   1  41  -1    0.05    0.20
   0 -41  -1    0.19    0.19
   0 -41   1    0.44    0.21
   0  41  -1    0.05    0.36
   0  41  -1    0.40    0.20
   0  41   1    0.56    0.20
   0  41   1    0.52    0.38
   1 -41   1    0.42    0.20
  -1 -41  -1   -0.18    0.17
   1  41   1   -0.09    0.32
   1  41   1    0.00    0.19
  -1  41  -1   -0.22    0.35
   2 -41   1    0.62    0.21
  -2 -41  -1    0.86    0.24
   2  41   1    0.70    0.38
  -2  41  -1    0.19    0.37
   2  41   1    0.90    0.25
   3 -41   1   -0.13    0.18
  -3 -41  -1    0.13    0.20
   3  41   1    0.35    0.23
  -3  41  -1    0.34    0.43
   3  41   1   -0.32    0.33
   4 -41   1    0.88    0.26
  -4 -41  -1    1.26    0.29
   4  41   1    0.77    0.26
  -4  41  -1    1.09    0.47
  -4 -42   1    0.49    0.24
   4 -42  -1    0.48    0.22
   4  42  -1    0.66    0.26
  -4  42   1    1.01    0.51
   4  42  -1    0.40    0.39
  -3 -42   1    0.18    0.20
   3 -42  -1   -0.20    0.18
  -3  42   1    0.08    0.44
   3  42  -1    0.21    0.37
   3  42  -1   -0.09    0.21
  -2 -42   1    0.12    0.20
   2 -42  -1   -0.26    0.17
   2  42  -1    0.32    0.38
  -2  42   1   -0.36    0.35
   2  42  -1    0.01    0.21
  -1 -42   1    0.05    0.18
   1 -42  -1    0.02    0.19
  -1  42   1   -0.09    0.33
   1  42  -1   -0.05    0.19
   1  42  -1   -0.24    0.31
   0 -42  -1   -0.07    0.17
   0 -42   1    0.13    0.20
   0  42   1    0.09    0.35
   0  42   1    0.34    0.19
   0  42  -1    0.40    0.20
   0  42  -1    0.21    0.35
  -1 -42  -1   -0.05    0.17
   1 -42   1    0.03    0.18
   1  42   1    0.28    0.21
  -1  42  -1    0.17    0.36
   1  42   1    0.18    0.34
   2 -42   1    0.22    0.20
  -2 -42  -1    0.33    0.21
   2  42   1    0.04    0.21
   2  42   1   -0.06    0.36
  -2  42  -1    0.18    0.37
  -3 -42  -1   -0.06    0.20
   3 -42   1    0.33    0.20
  -3  42  -1   -0.11    0.37
   3  42   1    0.13    0.22
   3  42   1    0.46    0.38
   4 -42   1    0.31    0.22
  -4 -42  -1   -0.24    0.19
   4  42   1    0.51    0.24
  -4  42  -1    0.00    0.44
   3 -43  -1    0.04    0.21
  -3 -43   1    0.84    0.25
  -3  43   1   -0.24    0.37
   3  43  -1    0.45    0.25
   3  43  -1    0.67    0.41
  -2 -43   1    0.09    0.21
   2 -43  -1    0.40    0.21
   2  43  -1    0.15    0.22
   2  43  -1    0.62    0.40
  -2  43   1   -0.46    0.35
   1 -43  -1    0.13    0.21
  -1 -43   1    0.08    0.19
  -1  43   1   -0.08    0.37
   1  43  -1    0.01    0.18
   1  43  -1    0.04    0.37
   0 -43  -1   -0.07    0.18
   0 -43   1    0.49    0.21
   0  43  -1    0.48    0.37
   0  43  -1    0.10    0.19
   0  43   1    0.30    0.19
   0  43   1   -0.37    0.31
  -1 -43  -1   -0.13    0.18
   1 -43   1    0.12    0.19
  -1  43  -1    0.17    0.38
   1  43   1    0.36    0.39
   1  43   1    0.09    0.20
  -2 -43  -1   -0.13    0.18
   2 -43   1    0.02    0.18
   2  43   1    0.08    0.21
   2  43   1   -0.26    0.34
  -2  43  -1    0.09    0.36
   3 -43   1    0.89    0.25
  -3 -43  -1    0.67    0.26
   3  43   1    0.74    0.26
  -3  43  -1    0.03    0.41
   3  43   1    1.02    0.43
  -3 -44   1    0.73    0.26
   3 -44  -1    0.76    0.25
  -3  44   1    1.67    0.53
   3  44  -1    1.37    0.47
   3  44  -1    0.61    0.27
   2 -44  -1    0.68    0.24
  -2 -44   1    0.75    0.25
   2  44  -1    0.30    0.24
   2  44  -1    0.86    0.42
  -2  44   1    0.80    0.46
  -1 -44   1   -0.14    0.18
   1 -44  -1    0.17    0.20
   1  44  -1   -0.27    0.17
   1  44  -1   -0.43    0.35
  -1  44   1    0.01    0.38
   0 -44  -1    0.19    0.21
   0 -44   1    0.15    0.19
   0  44   1    0.48    0.21
   0  44  -1   -0.22    0.32
   0  44   1   -0.31    0.36
  -1 -44  -1   -0.01    0.19
   1 -44   1    0.38    0.20
   1  44   1    0.48    0.37
   1  44   1    0.28    0.21
  -1  44  -1   -0.04    0.35
  -2 -44  -1    0.43    0.22
   2 -44   1    0.39    0.21
  -2  44  -1    0.02    0.40
   2  44   1    0.33    0.23
   2  44   1    0.51    0.41
  -3 -44  -1   -0.36    0.19
   3 -44   1   -0.16    0.20
   3  44   1    0.09    0.22
  -3  44  -1    0.26    0.45
  -2 -45   1    0.53    0.24
   2 -45  -1    0.42    0.23
  -2  45   1    1.04    0.49
   2  45  -1    0.78    0.26
   2  45  -1    0.83    0.43
   1 -45  -1   -0.16    0.19
  -1 -45   1    0.06    0.20
   1  45  -1    0.06    0.20
   1  45  -1   -0.92    0.32
  -1  45   1    0.29    0.40
   0 -45  -1    0.37    0.21
   0 -45   1    0.17    0.19
   0  45   1   -0.11    0.37
   0  45  -1   -0.06    0.37
  -1 -45  -1    0.06    0.19
   1 -45   1    0.05    0.21
  -1  45  -1    0.02    0.39
   1  45   1   -0.09    0.38
   1  45   1   -0.06    0.19
  -2 -45  -1   -0.07    0.21
   2 -45   1    0.32    0.21
  -2  45  -1   -0.19    0.40
   2  45   1   -0.15    0.21
   2  45   1    0.15    0.38
  -1 -46   1   -0.24    0.18
   1 -46  -1    0.01    0.20
   1  46  -1    0.01    0.20
  -1  46   1   -0.13    0.41
   1  46  -1   -0.43    0.33
   0 -46  -1    0.01    0.19
   0 -46   1   -0.07    0.19
   0  46  -1    0.00    0.38
   0  46   1   -0.27    0.37
  -1 -46  -1    1.35    0.28
   1 -46   1    0.50    0.24
   1  46   1    1.29    0.46
  -1  46  -1    0.20    0.43
   1  46   1    0.44    0.22
   9   0  -2   -1.12    0.90
  -9   0   2   -0.05    0.42
   8   0  -2    2.98    0.51
  -8   0   2    2.89    0.60
   8   0  -2    2.32    1.29
  -7   0   2    0.90    0.40
  -7   0   2   -0.26    0.54
   7   0  -2   -0.03    0.28
   6   0  -2   15.54    1.20
  -6   0   2   17.72    1.73
  -6   0   2   16.43    1.02
  -6   0   2   17.04    1.33
  -5   0   2    0.77    0.31
   5   0  -2    1.02    0.26
  -5   0   2    0.86    0.48
  -5   0   2    0.98    0.14
  -4   0   2    4.75    0.83
  -4   0   2    5.89    0.40
  -3   0   2    8.84    0.87
  -3   0   2    7.52    0.68
   3   0  -2    7.98    0.59
   2   0  -2    9.59    0.60
  -2   0   2    7.94    0.66
   1   0  -2   54.72    3.13
  -1   0   2   51.33    3.01
   1   0  -2   51.51    4.12
  -1   0   2   50.24    3.26
   0   0  -2    2.83    0.18
   0   0  -2    3.01    0.27
   0   0   2    2.76    0.18
   0   0   2    2.83    0.20
   1   0   2   36.46    2.18
  -1   0  -2   39.06    2.28
  -1   0  -2   37.64    2.94
  -2   0  -2    9.59    0.82
   2   0   2    7.78    0.50
  -3   0  -2    3.92    0.42
  -3   0  -2    4.93    0.62
   3   0   2    4.92    0.31
   3   0   2    4.12    0.44
  -4   0  -2   23.70    1.48
   4   0   2   22.39    1.26
  -4   0  -2   16.10    1.86
   5   0   2    0.14    0.08
   5   0   2    0.24    0.23
  -5   0  -2    0.00    0.24
  -5   0  -2   -0.09    0.40
  -6   0  -2    6.13    1.02
   6   0   2    5.31    0.65
  -6   0  -2    5.79    0.68
  -7   0  -2    0.46    0.33
   7   0   2   -0.14    0.28
  -7   0  -2    0.16    0.48
   8   0   2    6.01    0.76
  -8   0  -2    5.55    0.77
  -8   0  -2    5.84    1.14
   9   0   2    0.17    0.41
  -9   0  -2   -0.12    0.62
  -9  -1   2    0.29    0.43
   9  -1  -2    0.54    1.08
   9   1  -2    0.61    1.15
  -9   1   2   -0.08    0.43
  -8  -1   2    1.52    0.50
   8  -1  -2    2.16    1.18
   8  -1  -2    3.33    0.50
   8   1  -2    1.15    0.40
  -8   1   2    1.14    0.46
   8   1  -2    0.20    0.97
  -7  -1   2   -0.58    0.46
  -7  -1   2    0.49    0.37
   7  -1  -2    0.22    0.30
  -7   1   2   -0.19    0.32
   7   1  -2    0.14    0.27
  -7   1   2    0.27    0.55
  -6  -1   2    0.71    0.56
  -6  -1   2    0.32    0.33
  -6  -1   2    0.80    0.15
   6  -1  -2    0.67    0.29
  -6   1   2    1.10    0.40
   6   1  -2    0.37    0.26
  -6   1   2    0.48    0.51
  -5  -1   2    2.04    0.62
  -5  -1   2    2.43    0.24
  -5  -1   2    2.70    0.43
  -5   1   2    2.56    0.67
  -5   1   2    2.62    0.23
  -5   1   2    2.30    0.43
   4  -1  -2   47.44    2.94
  -4  -1   2   49.17    3.09
  -4  -1   2   47.20    3.89
   4   1  -2   47.42    2.94
  -4   1   2   46.17    3.08
  -4   1   2   46.32    2.75
  -4   1   2   46.17    3.88
   3  -1  -2    4.39    0.40
  -3  -1   2    4.82    0.62
  -3  -1   2    4.42    0.48
  -3   1   2    4.12    0.46
   3   1  -2    4.65    0.39
  -3   1   2    5.37    0.64
   2  -1  -2   93.44    5.54
  -2  -1   2   88.98    5.30
  -2  -1   2   90.84    5.74
   2   1  -2   95.14    5.54
  -2   1   2   90.20    5.74
  -1  -1   2    1.04    0.07
  -1  -1   2    0.88    0.15
   1  -1  -2    0.96    0.09
  -1  -1   2    0.71    0.08
   1  -1  -2    0.81    0.32
   1   1  -2    0.95    0.32
  -1   1   2    0.82    0.15
   0  -1  -2   55.33    3.45
   0  -1  -2   59.35    4.44
   0  -1   2   57.79    3.32
   0   1   2   59.84    3.56
   0   1  -2   58.46    4.43
   0   1   2   54.57    3.32
  -1  -1  -2    7.53    0.45
  -1  -1  -2    6.43    0.45
  -1  -1  -2    6.47    0.61
   1  -1   2    8.28    0.49
   1  -1   2    6.86    0.41
  -1   1  -2    6.76    0.63
   1   1   2    6.59    0.42
  -2  -1  -2  185.40   14.30
   2  -1   2  190.73   11.20
  -2  -1  -2  192.51   11.16
   2  -1   2  189.83   10.69
   2   1   2  173.76   10.70
  -2   1  -2  182.54   14.30
   3  -1   2    8.44    0.52
  -3  -1  -2    8.79    0.89
   3  -1   2    7.79    0.65
  -3   1  -2    8.05    0.66
   3   1   2    9.15    0.53
  -3   1  -2    7.77    0.88
  -4  -1  -2   54.66    3.40
   4  -1   2   55.10    3.32
  -4  -1  -2   48.75    4.29
   4  -1   2   53.56    3.06
   4   1   2   52.30    3.07
   4   1   2   52.38    3.31
  -4   1  -2   53.39    3.40
  -4   1  -2   50.95    4.29
  -5  -1  -2    1.25    0.32
  -5  -1  -2    1.22    0.50
   5  -1   2    1.05    0.13
   5  -1   2    0.80    0.27
  -5   1  -2    1.32    0.34
   5   1   2    0.80    0.28
  -5   1  -2    1.05    0.50
   5   1   2    1.01    0.13
  -6  -1  -2    3.27    0.77
   6  -1   2    3.37    0.51
  -6  -1  -2    3.39    0.52
   6   1   2    3.77    0.30
   6   1   2    3.28    0.51
  -6   1  -2    4.59    0.85
  -6   1  -2    3.37    0.55
   7  -1   2    1.20    0.36
  -7  -1  -2   -0.26    0.29
  -7  -1  -2   -0.27    0.52
  -7   1  -2   -0.56    0.48
  -7   1  -2   -0.19    0.30
   7   1   2    0.31    0.30
   8  -1   2    0.86    0.41
  -8  -1  -2    0.38    0.42
  -8  -1  -2    0.76    0.70
  -8   1  -2    0.78    0.42
  -8   1  -2    1.31    0.69
   8   1   2    1.04    0.42
   9  -1   2   -0.49    0.34
  -9  -1  -2   -0.69    0.59
   9   1   2   -0.08    0.39
  -9   1  -2   -0.29    0.63
   9  -2  -2    1.30    1.14
  -9  -2   2    0.11    0.43
  -9   2   2    0.24    0.45
   9   2  -2    0.38    1.02
  -8  -2   2    0.03    0.37
   8  -2  -2    0.86    0.36
   8  -2  -2   -0.34    0.94
   8   2  -2    0.42    0.93
   8   2  -2    0.90    0.36
  -8   2   2    0.96    0.45
   7  -2  -2    2.36    0.40
  -7  -2   2    2.11    0.70
  -7  -2   2    0.50    0.38
   7   2  -2    2.26    0.39
  -7   2   2    1.40    0.66
  -7   2   2    0.11    0.39
  -6  -2   2    1.08    0.17
  -6  -2   2    0.77    0.58
   6  -2  -2    0.59    0.29
  -6  -2   2    0.42    0.35
  -6   2   2    0.25    0.36
  -6   2   2    1.46    0.61
   6   2  -2    0.62    0.29
  -5  -2   2    3.25    0.69
  -5  -2   2    4.40    0.52
  -5   2   2    2.66    0.27
  -5   2   2    3.20    0.50
  -5   2   2    3.39    0.73
   4  -2  -2   15.13    1.00
  -4  -2   2   11.59    1.40
  -4  -2   2   15.07    1.08
  -4  -2   2   13.47    0.87
  -4   2   2   17.77    1.47
   4   2  -2   13.38    0.98
   3  -2  -2    5.60    0.49
  -3  -2   2    7.45    0.75
  -3  -2   2    7.72    0.42
  -3  -2   2    5.97    0.57
  -3   2   2    4.93    0.57
  -3   2   2    6.50    0.75
   3   2  -2    5.18    0.47
  -3   2   2    6.31    0.40
  -2  -2   2   39.99    2.36
   2  -2  -2   41.91    2.48
  -2  -2   2   39.76    2.59
  -2   2   2   40.54    2.60
   1  -2  -2   43.03    2.45
  -1  -2   2   40.39    2.35
  -1  -2   2   41.86    2.56
  -1  -2   2   40.84    2.44
   1  -2  -2   41.00    3.27
  -1   2   2   39.39    2.56
   1   2  -2   36.89    3.23
   0  -2  -2    9.17    0.59
   0  -2  -2    8.93    0.80
   0  -2   2    9.77    0.57
   0   2  -2    9.33    0.78
   0   2   2    9.78    0.62
   0   2   2    8.73    0.57
  -1  -2  -2   15.70    0.96
  -1  -2  -2   15.83    1.26
   1  -2   2   15.90    0.91
  -1  -2  -2   15.18    0.98
   1   2   2   15.12    0.92
  -1   2  -2   16.22    1.28
  -2  -2  -2  147.85    8.60
   2  -2   2  143.65    8.24
  -2  -2  -2  141.16   11.03
   2  -2   2  146.19    8.65
  -2   2  -2  143.18    8.88
   2   2   2  140.55    8.25
  -2   2  -2  138.71   11.04
   3  -2   2   15.06    1.03
  -3  -2  -2   14.33    1.33
   3  -2   2   14.94    0.87
  -3  -2  -2   14.24    0.94
   3   2   2   14.54    0.88
  -3   2  -2   14.36    1.34
  -3   2  -2   15.07    1.03
  -4  -2  -2   16.94    1.67
   4  -2   2   18.28    1.28
  -4  -2  -2   17.92    1.28
   4   2   2   18.78    1.10
  -4   2  -2   20.11    1.72
   4   2   2   17.19    1.26
   5  -2   2    0.63    0.11
  -5  -2  -2    1.41    0.30
  -5   2  -2    0.81    0.47
  -5   2  -2    1.26    0.34
   5   2   2    1.02    0.13
  -6  -2  -2    4.08    0.56
   6  -2   2    3.80    0.53
  -6  -2  -2    4.48    0.85
  -6   2  -2    3.97    0.86
   6   2   2    4.03    0.32
   6   2   2    3.13    0.52
  -6   2  -2    4.32    0.60
  -7  -2  -2   -0.15    0.32
   7  -2   2    0.22    0.31
  -7  -2  -2    1.73    0.64
  -7   2  -2   -0.20    0.31
   7   2   2    1.32    0.36
  -7   2  -2    0.94    0.62
  -8  -2  -2    0.91    0.66
  -8  -2  -2    0.30    0.40
   8  -2   2    0.12    0.37
   8   2   2    0.23    0.37
  -8   2  -2    1.06    0.46
  -8   2  -2    1.18    0.68
   9  -2   2    0.72    0.42
  -9  -2  -2    0.33    0.68
  -9   2  -2    0.00    0.61
   9   2   2   -0.02    0.37
   9  -3  -2    0.94    1.21
  -9  -3   2    1.61    0.53
  -9   3   2    1.51    0.55
   9   3  -2    0.49    1.11
   8  -3  -2    0.14    0.31
  -8  -3   2    0.41    0.41
   8  -3  -2    0.31    0.91
   8   3  -2    2.12    1.07
  -8   3   2    0.20    0.41
   7  -3  -2    1.63    0.38
  -7  -3   2    2.01    0.46
  -7  -3   2    0.92    0.60
  -7   3   2    0.34    0.38
   7   3  -2    1.18    0.34
  -7   3   2    1.37    0.64
  -6  -3   2    5.18    0.68
  -6  -3   2    6.07    1.04
   6  -3  -2    7.69    0.69
  -6   3   2    6.08    1.04
  -6   3   2    5.59    0.76
   6   3  -2    8.32    0.70
   5  -3  -2    7.73    0.69
  -5  -3   2    9.74    0.78
  -5  -3   2    9.32    1.04
  -5   3   2    8.72    0.81
  -5   3   2    8.29    1.04
  -5   3   2    7.47    0.52
   5   3  -2    6.87    0.67
   4  -3  -2    2.25    0.30
  -4  -3   2    1.57    0.55
  -4  -3   2    1.57    0.20
  -4  -3   2    2.38    0.35
   4   3  -2    1.80    0.28
  -4   3   2    2.16    0.58
  -3  -3   2   28.89    1.75
   3  -3  -2   31.42    1.87
  -3  -3   2   29.15    1.96
  -3  -3   2   29.25    2.46
  -3   3   2   29.92    1.73
  -3   3   2   29.33    2.48
  -3   3   2   29.35    1.98
  -2  -3   2  206.02   12.28
   2  -3  -2  215.61   12.81
  -2  -3   2  216.17   13.21
  -2   3   2  218.33   12.27
  -2   3   2  209.29   13.22
   1  -3  -2  162.77    9.17
  -1  -3   2  146.01    8.80
  -1  -3   2  157.28    9.46
   1  -3  -2  149.77   11.82
   1   3  -2  150.82   11.78
  -1   3   2  149.66    9.47
   0  -3  -2  302.98   18.85
   0  -3  -2  265.65   24.04
   0  -3   2  340.45   18.11
   0   3  -2  322.74   19.40
   0   3   2  314.62   19.38
   0   3  -2  337.33   24.09
   0   3   2  315.83   18.11
  -1  -3  -2  191.65   12.63
  -1  -3  -2  217.41   12.29
   1  -3   2  202.58   11.79
  -1  -3  -2  206.82   15.70
  -1   3  -2  197.80   15.71
   1   3   2  213.27   11.80
   2  -3   2  131.42    7.70
  -2  -3  -2  126.04    9.82
   2  -3   2  130.21    7.32
  -2  -3  -2  130.12    7.65
  -2   3  -2  126.65    7.90
   2   3   2  121.35    7.33
  -2   3  -2  123.91    9.83
  -3  -3  -2   12.87    1.30
   3  -3   2   15.07    0.86
  -3  -3  -2   14.77    0.93
   3  -3   2   15.18    1.02
  -3   3  -2   14.02    1.03
   3   3   2   14.43    0.88
  -3   3  -2   14.62    1.34
  -4  -3  -2    9.99    0.72
  -4  -3  -2    7.80    1.08
   4  -3   2    9.07    0.81
  -4  -3  -2   10.40    0.81
   4  -3   2   12.27    0.64
  -4   3  -2   12.66    0.87
  -4   3  -2    8.11    1.10
   4   3   2   10.44    0.66
   5  -3   2    4.35    0.31
  -5  -3  -2    4.78    0.81
  -5  -3  -2    4.83    0.52
   5  -3   2    4.59    0.52
  -5   3  -2    5.19    0.87
   5   3   2    3.87    0.51
  -5   3  -2    5.20    0.58
   5   3   2    4.77    0.35
  -6  -3  -2    4.25    0.57
  -6  -3  -2    4.31    0.85
   6  -3   2    3.24    0.52
  -6   3  -2    4.37    0.61
   6   3   2    3.50    0.55
  -6   3  -2    4.65    0.89
   6   3   2    4.16    0.33
   7  -3   2    1.86    0.45
  -7  -3  -2    2.51    0.48
  -7  -3  -2    2.38    0.75
  -7   3  -2    3.12    0.78
   7   3   2    2.53    0.48
  -7   3  -2    2.59    0.53
   8  -3   2    0.44    0.38
  -8  -3  -2    0.10    0.64
  -8  -3  -2    0.09    0.36
  -8   3  -2   -0.15    0.61
  -8   3  -2   -0.18    0.37
   8   3   2   -0.21    0.35
  -9  -3  -2    2.09    0.81
   9  -3   2    0.48    0.43
   9   3   2    1.40    0.47
  -9   3  -2    2.25    0.85
   9  -4  -2   -0.10    1.13
  -9  -4   2    0.11    0.42
  -9   4   2    0.67    0.51
   9   4  -2   -2.01    1.02
  -8  -4   2    0.79    0.43
   8  -4  -2    0.96    0.37
  -8   4   2    0.86    0.48
  -7  -4   2    0.31    0.35
  -7  -4   2    1.42    0.63
   7  -4  -2    1.72    0.36
  -7   4   2    0.23    0.39
   7   4  -2    2.25    0.41
   6  -4  -2    0.08    0.28
  -6  -4   2    0.15    0.51
  -6  -4   2    0.53    0.34
  -6   4   2    0.16    0.37
   6   4  -2   -0.10    0.28
  -6   4   2    1.43    0.61
  -5  -4   2    4.49    0.39
  -5  -4   2    4.95    0.55
  -5  -4   2    4.56    0.83
  -5   4   2    4.95    0.62
  -5   4   2    5.75    0.36
  -5   4   2    4.85    0.87
   4  -4  -2    4.40    0.46
  -4   4   2    3.78    0.29
  -4   4   2    4.44    0.53
  -4   4   2    4.12    0.74
  -3  -4   2    0.80    0.32
   3  -4  -2    0.74    0.17
  -3  -4   2    0.56    0.22
  -3  -4   2    0.55    0.11
  -3   4   2    2.46    0.44
  -2  -4   2    7.54    0.48
   2  -4  -2    7.51    0.52
  -2  -4   2    7.59    0.58
   2  -4  -2    8.33    0.96
  -2   4   2    7.52    0.60
  -2   4   2    7.23    0.45
   2   4  -2    7.03    0.84
  -1  -4   2   69.76    4.22
   1  -4  -2   70.36    4.07
  -1  -4   2   64.96    3.91
   1   4  -2   65.28    5.29
  -1   4   2   67.43    4.23
   0  -4   2    3.41    0.21
   0  -4  -2    3.00    0.21
   0   4  -2    3.14    0.29
   0   4   2    2.96    0.21
   0   4  -2    3.11    0.24
   0   4   2    3.18    0.24
  -1  -4  -2   38.69    2.14
  -1  -4  -2   38.79    2.75
   1   4   2   30.53    2.19
  -1   4  -2   32.85    2.76
  -1   4  -2   34.23    2.21
   1   4   2   36.12    2.05
   2  -4   2   27.74    1.75
  -2  -4  -2   27.60    1.69
   2  -4   2   28.44    1.60
  -2  -4  -2   27.81    2.23
   2   4   2   27.21    1.62
  -2   4  -2   26.00    2.24
  -2   4  -2   27.93    1.78
  -3  -4  -2    0.58    0.31
   3  -4   2    0.19    0.16
  -3  -4  -2    0.09    0.09
  -3   4  -2    0.25    0.30
  -3   4  -2    0.75    0.21
   4  -4   2    5.39    0.33
   4  -4   2    4.14    0.50
  -4   4  -2    3.78    0.74
  -4   4  -2    5.48    0.57
  -5  -4  -2    4.16    0.50
   5  -4   2    4.67    0.31
   5  -4   2    4.36    0.52
  -5  -4  -2    4.30    0.76
  -5   4  -2    4.82    0.57
   5   4   2    4.31    0.34
   5   4   2    4.29    0.52
  -5   4  -2    4.98    0.83
  -6  -4  -2    2.13    0.68
  -6  -4  -2    1.80    0.42
   6  -4   2    2.46    0.45
   6   4   2    2.61    0.46
  -6   4  -2    2.56    0.50
  -6   4  -2    1.42    0.68
   7  -4   2   -0.01    0.30
  -7  -4  -2    0.32    0.32
  -7  -4  -2   -0.17    0.50
  -7   4  -2   -0.04    0.52
   7   4   2   -0.16    0.29
  -7   4  -2    0.33    0.37
  -8  -4  -2    1.11    0.43
  -8  -4  -2    1.13    0.68
   8  -4   2    0.19    0.36
  -8   4  -2   -0.06    0.60
   8   4   2   -0.18    0.35
  -8   4  -2    0.06    0.41
   9  -4   2    0.56    0.41
  -9  -4  -2    0.35    0.70
   9   4   2   -0.07    0.35
  -9   4  -2    0.87    0.75
   9  -5  -2    0.39    1.20
  -9  -5   2    0.32    0.42
  -9   5   2    0.59    0.48
   9   5  -2   -0.81    0.89
  -8  -5   2   -0.19    0.35
   8  -5  -2    0.21    1.09
   8  -5  -2    0.52    0.35
  -8   5   2    0.29    0.46
   8   5  -2    0.38    0.96
   7  -5  -2    1.86    0.39
  -7  -5   2    0.98    0.39
  -7   5   2    0.69    0.40
   7   5  -2    1.56    0.37
   6  -5  -2    9.28    0.73
  -6  -5   2    6.10    1.07
  -6  -5   2    4.80    0.69
  -6  -5   2    7.12    0.53
  -6   5   2    7.35    1.13
   6   5  -2    8.26    0.72
  -5  -5   2    0.97    0.31
  -5  -5   2    0.88    0.51
  -5  -5   2    0.96    0.17
  -5   5   2    1.20    0.53
  -5   5   2    1.05    0.35
  -5   5   2    1.16    0.13
   4  -5  -2   52.43    3.26
  -4  -5   2   53.50    4.27
  -4  -5   2   51.11    3.07
  -4  -5   2   53.38    3.19
  -4  -5   2   55.63    3.39
  -4   5   2   51.00    3.04
  -4   5   2   49.46    4.28
  -4   5   2   52.46    3.43
  -3  -5   2    0.01    0.08
   3  -5  -2   -0.01    0.13
  -3   5   2   -0.11    0.18
  -3   5   2   -0.23    0.27
  -3   5   2    0.06    0.05
  -2  -5   2   27.21    1.59
   2  -5  -2   27.60    1.68
  -2  -5   2   26.74    1.75
   2  -5  -2   24.99    2.36
   2   5  -2   25.42    2.29
  -2   5   2   26.93    1.79
  -2   5   2   28.54    1.57
   1  -5  -2   17.08    1.02
   1  -5  -2   14.31    1.54
  -1  -5   2   16.89    0.99
  -1   5   2   16.61    1.12
   0  -5  -2  322.70   20.57
   0  -5   2  344.38   20.57
   0   5   2  335.20   19.73
   0   5   2  357.00   21.14
   0   5  -2  354.98   26.23
   0   5  -2  342.40   21.20
   1  -5   2   25.88    1.54
  -1  -5  -2   27.11    2.09
  -1  -5  -2   28.11    1.62
  -1   5  -2   26.04    1.68
   1   5   2   25.95    1.66
  -1   5  -2   25.35    2.11
   1   5   2   27.17    1.56
   2  -5   2    2.55    0.28
   2  -5   2    2.45    0.15
  -2  -5  -2    2.48    0.36
  -2  -5  -2    2.05    0.21
  -2   5  -2    2.23    0.26
   2   5   2    2.43    0.20
  -2   5  -2    2.09    0.39
   3  -5   2    9.29    0.75
  -3  -5  -2   10.51    0.67
  -3  -5  -2    9.05    0.96
  -3   5  -2    8.79    1.00
  -3   5  -2    9.45    0.75
   3   5   2   11.33    0.64
   4  -5   2   91.85    5.93
   4  -5   2   93.59    5.57
  -4  -5  -2  105.36    6.08
  -4  -5  -2  101.03    5.86
  -4  -5  -2   95.14    7.61
   4   5   2  102.09    5.61
  -4   5  -2   95.23    6.11
  -4   5  -2   86.53    7.62
   5  -5   2    0.58    0.25
  -5  -5  -2   -0.19    0.35
  -5  -5  -2    0.79    0.26
  -5   5  -2    1.47    0.50
  -5   5  -2    0.88    0.32
   5   5   2    0.22    0.11
   6  -5   2    9.02    0.85
  -6  -5  -2    9.42    1.20
  -6  -5  -2    7.87    0.81
   6   5   2    9.54    0.62
  -6   5  -2   10.34    0.92
  -6   5  -2    9.20    1.20
   6   5   2    8.79    0.83
  -7  -5  -2    2.95    0.48
   7  -5   2    2.67    0.50
  -7  -5  -2    2.74    0.78
  -7   5  -2    2.27    0.78
   7   5   2    3.39    0.54
  -7   5  -2    2.98    0.57
  -8  -5  -2    0.01    0.63
   8  -5   2   -0.44    0.30
  -8  -5  -2   -0.08    0.34
  -8   5  -2   -0.64    0.33
  -8   5  -2   -1.10    0.56
   8   5   2    0.20    0.35
  -9  -5  -2    0.92    0.74
   9  -5   2    1.16    0.45
  -9   5  -2    0.26    0.46
   9   5   2    0.42    0.40
  -9   5  -2   -0.06    0.72
   9  -6  -2    0.70    1.21
  -9  -6   2   -0.49    0.36
  -9   6   2   -0.32    0.41
   9   6  -2    0.19    1.03
  -8  -6   2    3.91    0.65
   8  -6  -2    2.36    1.31
   8  -6  -2    5.07    0.62
  -8   6   2    4.19    0.74
   8   6  -2    2.37    1.21
  -7  -6   2    0.96    0.38
   7  -6  -2    1.53    0.36
   7   6  -2    3.11    0.45
  -7   6   2    0.58    0.42
  -6  -6   2   15.05    0.93
  -6  -6   2   12.04    1.50
  -6   6   2   14.75    1.60
  -5  -6   2    1.27    0.32
  -5  -6   2    0.94    0.46
  -5  -6   2    1.20    0.17
   5  -6  -2    0.75    0.25
  -5   6   2    1.09    0.38
  -5   6   2    0.50    0.47
  -5   6   2    0.75    0.10
  -4  -6   2   30.02    1.69
  -4  -6   2   26.04    1.82
  -4  -6   2   23.44    1.62
  -4  -6   2   24.48    2.31
   4  -6  -2   24.25    1.75
  -4   6   2   27.97    2.40
  -4   6   2   29.45    1.59
  -4   6   2   30.99    1.92
  -3  -6   2   45.15    2.83
   3  -6  -2   44.39    2.73
  -3  -6   2   43.03    3.54
  -3  -6   2   43.24    2.58
  -3   6   2   45.02    2.88
  -3   6   2   43.68    3.58
  -3   6   2   43.82    2.55
   2  -6  -2  168.60    9.83
   2  -6  -2  142.32   12.71
  -2  -6   2  169.31   10.14
  -2  -6   2  164.65    9.42
  -2   6   2  166.55   10.17
   2   6  -2  153.01   12.66
  -2   6   2  175.49    9.40
  -1  -6   2   36.62    2.00
   1  -6  -2   28.62    2.82
   1  -6  -2   37.43    2.08
  -1   6   2   36.81    2.19
   1   6  -2   29.62    2.19
   0  -6   2    1.50    0.14
   0  -6  -2    1.35    0.14
   0  -6   2    1.93    0.15
   0   6  -2    1.63    0.19
   0   6   2    1.39    0.16
   0   6  -2    1.58    0.17
   0   6   2    1.39    0.13
   1  -6   2   16.14    1.03
  -1  -6  -2   19.22    1.09
  -1   6  -2   17.17    1.14
  -1   6  -2   17.38    1.44
   1   6   2   18.38    1.05
   1   6   2   17.45    1.11
  -2  -6  -2  190.84   15.32
  -2  -6  -2  204.39   11.98
   2  -6   2  201.48   12.03
   2   6   2  206.58   11.50
  -2   6  -2  197.08   12.36
  -2   6  -2  195.50   15.35
   3  -6   2   24.57    1.58
  -3  -6  -2   22.53    2.02
  -3  -6  -2   24.01    1.50
  -3   6  -2   21.97    2.06
   3   6   2   24.09    1.43
  -3   6  -2   26.12    1.62
   4  -6   2   95.52    5.85
  -4  -6  -2   92.17    5.76
  -4  -6  -2   90.19    7.49
  -4   6  -2   96.84    7.55
   4   6   2   87.73    5.52
  -4   6  -2  109.66    6.05
   5  -6   2    0.71    0.27
  -5  -6  -2    0.85    0.42
  -5  -6  -2    0.95    0.18
  -5  -6  -2    0.84    0.26
  -5   6  -2    0.52    0.29
  -5   6  -2    1.29    0.49
   5   6   2    0.57    0.13
  -6  -6  -2    0.67    0.33
   6  -6   2    0.59    0.32
  -6  -6  -2    1.03    0.56
   6   6   2    0.00    0.29
  -6   6  -2    0.48    0.55
  -6   6  -2   -0.14    0.34
  -7  -6  -2    0.71    0.59
   7  -6   2    0.82    0.35
  -7  -6  -2    0.43    0.33
  -7   6  -2   -0.31    0.33
   7   6   2   -0.30    0.31
  -7   6  -2   -0.51    0.51
   8  -6   2    8.84    0.92
  -8  -6  -2    8.24    1.36
  -8   6  -2    8.43    1.40
   8   6   2    9.78    0.94
  -8   6  -2    9.17    0.97
  -9  -6  -2    0.71    0.66
   9  -6   2    0.17    0.38
  -9   6  -2    0.13    0.45
  -9   6  -2    0.66    0.67
   9   6   2    0.95    0.44
  -9  -7   2    0.19    0.39
   9  -7  -2   -2.42    0.84
   9   7  -2    1.14    1.13
  -9   7   2    0.19    0.47
   8  -7  -2    0.19    0.98
  -8  -7   2    0.71    0.41
   8  -7  -2    0.67    0.34
   8   7  -2    2.71    1.19
  -8   7   2    0.77    0.48
  -7  -7   2    0.46    0.33
  -7  -7   2   -0.05    0.15
   7  -7  -2    0.57    0.30
  -7   7   2    0.65    0.40
   7   7  -2    0.20    0.29
  -6  -7   2    8.60    0.84
  -6  -7   2    8.28    0.64
  -6  -7   2    9.08    1.29
   6  -7  -2    9.14    0.81
  -6   7   2    9.49    1.24
  -6   7   2    8.99    0.94
   6   7  -2   10.18    0.83
   5  -7  -2    3.06    0.41
  -5  -7   2    3.91    0.73
  -5  -7   2    3.30    0.45
  -5  -7   2    3.96    0.33
  -5  -7   2    3.38    0.33
  -5   7   2    2.97    0.52
  -5   7   2    3.28    0.72
   4  -7  -2   11.91    0.89
  -4  -7   2   13.88    0.96
  -4  -7   2   10.39    0.79
  -4  -7   2   10.81    1.24
  -4   7   2   13.60    0.74
  -4   7   2   11.59    1.28
  -4   7   2   13.11    1.00
  -3  -7   2    0.13    0.18
   3  -7  -2    0.09    0.13
  -3  -7   2   -0.07    0.08
  -3  -7   2   -0.03    0.07
  -3  -7   2    0.00    0.25
  -2  -7   2    0.14    0.07
  -2  -7   2   -0.05    0.13
   2  -7  -2    0.49    0.43
   2  -7  -2    0.04    0.09
  -2   7   2   -0.04    0.04
  -2   7   2    0.32    0.17
   2   7  -2    0.05    0.31
  -1  -7   2   33.85    1.91
   1  -7  -2   32.90    1.99
   1   7  -2   29.81    2.09
  -1   7   2   33.87    2.10
   0  -7  -2   41.53    2.53
   0  -7   2   46.54    2.54
   0   7   2   39.09    2.43
   0   7  -2   40.54    2.63
   0   7   2   41.80    2.62
   0   7  -2   41.92    3.23
   1  -7   2   42.98    2.66
  -1  -7  -2   50.53    2.78
  -1   7  -2   45.93    2.88
  -1   7  -2   44.29    3.59
   1   7   2   46.01    2.67
   1   7   2   46.00    2.86
   2  -7   2   14.04    0.96
  -2  -7  -2   14.82    1.21
  -2  -7  -2   13.60    0.90
  -2   7  -2   14.22    1.25
   2   7   2   14.41    0.87
   3  -7   2    2.04    0.30
  -3  -7  -2    1.72    0.20
  -3  -7  -2    2.23    0.43
  -3   7  -2    1.96    0.47
   4  -7   2    1.46    0.29
  -4  -7  -2    0.74    0.17
  -4  -7  -2    0.59    0.38
  -4   7  -2    1.97    0.53
  -5  -7  -2    2.01    0.31
  -5  -7  -2    1.24    0.21
  -5  -7  -2    1.58    0.51
   5  -7   2    1.15    0.31
  -5   7  -2    1.43    0.53
  -5   7  -2    0.98    0.34
   5   7   2    1.25    0.18
  -6  -7  -2   21.16    2.14
  -6  -7  -2   23.42    1.63
   6  -7   2   25.06    1.65
  -6   7  -2   20.96    2.20
   6   7   2   22.74    1.64
  -6   7  -2   24.66    1.73
   6   7   2   22.32    1.40
  -7  -7  -2    0.03    0.29
   7  -7   2   -0.16    0.27
  -7  -7  -2   -0.23    0.45
   7   7   2   -0.57    0.27
  -7   7  -2    0.15    0.49
  -7   7  -2    0.47    0.37
  -8  -7  -2    0.88    0.70
   8  -7   2    3.86    0.57
  -8   7  -2    3.42    0.65
   8   7   2    2.77    0.57
  -8   7  -2    1.58    0.83
  -9  -7  -2   -0.09    0.61
   9  -7   2    0.40    0.39
  -9   7  -2    0.33    0.67
  -9   7  -2   -0.19    0.43
   9   7   2    0.07    0.38
   9  -8  -2   -0.26    1.13
  -9  -8   2    0.12    0.37
   9   8  -2    2.16    1.12
  -9   8   2    0.02    0.45
   8  -8  -2    2.45    1.21
  -8  -8   2    0.98    0.41
   8   8  -2    1.44    1.02
  -8   8   2    1.11    0.49
   7  -8  -2    3.24    0.48
  -7  -8   2    2.86    0.52
  -7  -8   2    3.33    0.34
   7   8  -2    3.92    0.54
  -7   8   2    2.30    0.59
  -6  -8   2    1.39    0.37
  -6   8   2    1.09    0.42
  -5  -8   2    7.94    0.51
  -5  -8   2    6.57    0.51
  -5  -8   2    7.54    0.69
   5  -8  -2    6.74    0.63
  -5  -8   2    7.14    0.95
  -5   8   2    6.62    0.73
  -5   8   2    5.92    0.99
  -4  -8   2    1.93    0.52
   4  -8  -2    2.29    0.31
  -4  -8   2    1.98    0.23
  -4  -8   2    2.35    0.24
  -4  -8   2    2.45    0.35
  -4   8   2    2.67    0.59
  -4   8   2    2.59    0.19
   3  -8  -2    0.37    0.14
  -3  -8   2    0.83    0.29
  -3   8   2    0.32    0.05
  -3   8   2    0.13    0.33
  -3   8   2    0.36    0.22
  -2  -8   2   30.00    1.78
  -2  -8   2   25.80    1.62
   2  -8  -2   24.99    2.39
   2  -8  -2   27.73    1.70
   2   8  -2   25.95    2.30
  -2   8   2   28.18    1.59
  -2   8   2   28.39    1.82
   1  -8  -2    3.25    0.65
  -1  -8   2    5.31    0.35
   1  -8  -2    5.47    0.36
  -1  -8   2    6.08    0.37
  -1   8   2    5.60    0.44
   1   8  -2    5.13    0.45
   0  -8   2    0.09    0.06
   0  -8  -2    0.10    0.06
   0  -8   2    0.14    0.07
   0   8  -2    0.10    0.11
   0   8   2    0.14    0.06
   0   8   2    0.08    0.10
   0   8  -2    0.23    0.10
   1  -8   2    3.77    0.24
  -1  -8  -2    4.04    0.27
   1   8   2    3.85    0.28
  -1   8  -2    3.28    0.30
  -1   8  -2    3.33    0.42
   1   8   2    3.60    0.27
  -2  -8  -2   20.76    1.74
  -2  -8  -2   21.80    1.33
   2  -8   2   22.49    1.39
  -2   8  -2   22.52    1.41
  -2   8  -2   21.20    1.79
   2   8   2   21.79    1.28
   2   8   2   19.11    1.38
  -3  -8  -2    2.55    0.25
  -3  -8  -2    2.90    0.47
   3  -8   2    2.52    0.33
  -3   8  -2    2.91    0.55
  -3   8  -2    2.61    0.35
  -4  -8  -2    9.33    0.66
  -4  -8  -2    8.79    1.02
   4  -8   2    9.86    0.77
  -4   8  -2    9.89    0.81
   4   8   2    9.58    0.63
  -4   8  -2    8.69    1.09
   5  -8   2    0.21    0.24
  -5  -8  -2    0.43    0.15
  -5  -8  -2    1.34    0.48
  -5  -8  -2    0.94    0.25
  -5   8  -2    0.31    0.29
  -5   8  -2    0.32    0.44
  -6  -8  -2    3.71    0.40
   6  -8   2    4.21    0.56
  -6  -8  -2    3.91    0.52
  -6  -8  -2    4.42    0.88
   6   8   2    3.98    0.36
  -6   8  -2    4.38    0.64
  -6   8  -2    3.63    0.88
  -7  -8  -2   -0.10    0.29
   7  -8   2    1.48    0.38
  -7  -8  -2    0.34    0.51
   7   8   2    1.40    0.38
  -7   8  -2    0.29    0.34
  -7   8  -2    0.28    0.55
   8  -8   2    0.39    0.36
  -8  -8  -2    0.42    0.66
  -8   8  -2    0.78    0.46
  -8   8  -2    0.41    0.66
   8   8   2   -0.10    0.37
   9  -8   2    0.59    0.41
  -9  -8  -2    0.62    0.68
   9   8   2   -0.15    0.39
  -9   8  -2    0.39    0.47
  -9   8  -2    1.01    0.73
   9  -9  -2    1.59    1.18
  -9  -9   2    0.33    0.40
  -9   9   2    1.19    0.56
   9   9  -2    0.95    1.10
   8  -9  -2    1.65    1.17
  -8  -9   2    0.66    0.39
  -8   9   2    0.00    0.44
   8   9  -2    0.83    1.01
   7  -9  -2    0.89    0.30
  -7  -9   2    1.08    0.20
  -7  -9   2    0.36    0.33
   7   9  -2    1.08    0.33
  -7   9   2    0.12    0.36
  -6  -9   2   12.79    1.42
  -6  -9   2   12.23    0.84
  -6   9   2   12.83    1.49
  -5  -9   2   12.44    0.81
  -5  -9   2   11.97    0.83
  -5  -9   2   13.47    1.32
  -5  -9   2   12.97    0.98
   5  -9  -2   11.85    0.92
  -5   9   2   11.75    1.04
  -5   9   2   11.81    1.34
  -4  -9   2    0.19    0.18
  -4  -9   2   -0.23    0.29
  -4  -9   2   -0.09    0.10
   4  -9  -2    0.18    0.16
  -4   9   2    0.07    0.36
  -4   9   2    0.20    0.24
  -3  -9   2   15.67    1.02
  -3  -9   2   15.54    1.00
  -3  -9   2   16.42    1.12
  -3  -9   2   16.66    1.43
   3  -9  -2   15.66    1.07
  -3   9   2   15.89    1.18
  -3   9   2   17.55    0.96
  -2  -9   2    4.88    0.35
   2  -9  -2    4.82    0.39
  -2  -9   2    5.14    0.37
   2  -9  -2    5.50    0.87
   2   9  -2    4.60    0.68
   2   9  -2    4.21    0.49
  -2   9   2    6.15    0.33
  -2   9   2    6.02    0.49
   1  -9  -2    2.85    0.55
   1  -9  -2    4.06    0.27
  -1  -9   2    3.79    0.26
  -1  -9   2    4.09    0.28
   1   9  -2    2.62    0.38
  -1   9   2    3.74    0.34
   1   9  -2    3.70    0.33
   0  -9  -2   69.95    4.40
   0  -9   2   80.33    4.41
   0   9  -2   70.76    4.56
   0   9   2   74.23    4.55
   0   9  -2   72.94    5.61
   0   9   2   70.52    4.23
   1  -9   2   44.21    2.51
  -1  -9  -2   47.03    2.63
   1   9   2   43.25    2.53
  -1   9  -2   41.79    2.74
  -1   9  -2   41.33    3.40
   1   9   2   42.32    2.71
   2  -9   2    1.16    0.21
   2  -9   2    1.47    0.12
  -2  -9  -2    1.96    0.18
   2   9   2    1.80    0.20
  -2   9  -2    1.65    0.36
  -2   9  -2    1.71    0.23
   3  -9   2    1.03    0.23
  -3  -9  -2    1.34    0.36
  -3   9  -2    1.14    0.41
  -3   9  -2    1.32    0.25
  -4  -9  -2   -0.16    0.28
   4  -9   2   -0.37    0.16
  -4  -9  -2   -0.14    0.10
  -4   9  -2   -0.17    0.32
  -4   9  -2   -0.11    0.22
   5  -9   2   11.83    0.98
  -5  -9  -2   13.46    0.95
  -5  -9  -2   13.07    0.87
  -5  -9  -2   12.49    1.29
  -5   9  -2   12.28    1.36
  -5   9  -2   12.20    1.04
   5   9   2   12.33    0.82
  -6  -9  -2    9.10    0.68
   6  -9   2    9.01    0.85
  -6  -9  -2    8.14    1.15
  -6  -9  -2    8.55    0.77
  -6   9  -2   10.08    1.23
  -6   9  -2    9.21    0.88
   6   9   2    8.67    0.62
   7  -9   2    2.09    0.42
  -7  -9  -2    1.59    0.66
  -7  -9  -2    1.41    0.37
   7   9   2    1.70    0.43
  -7   9  -2    1.62    0.48
   7   9   2    1.13    0.20
  -7   9  -2    2.02    0.73
  -8  -9  -2   -0.14    0.54
   8  -9   2   -0.29    0.32
   8   9   2    0.22    0.37
  -8   9  -2    0.10    0.60
  -8   9  -2    0.37    0.43
   9  -9   2    0.09    0.38
  -9  -9  -2    1.11    0.68
  -9   9  -2    0.21    0.47
  -9   9  -2    0.25    0.68
   9   9   2    0.08    0.39
  -9 -10   2    0.41    0.42
   9 -10  -2    0.41    1.07
   9  10  -2    1.55    1.11
  -9  10   2   -0.39    0.43
   8 -10  -2    5.85    0.65
   8 -10  -2    4.04    1.41
  -8 -10   2    5.83    0.73
  -8  10   2    5.18    0.82
   8  10  -2    3.40    1.25
  -7 -10   2    2.79    0.32
   7 -10  -2    2.86    0.44
   7 -10  -2    0.96    1.00
  -7 -10   2    2.02    0.43
   7  10  -2    3.61    0.51
  -7  10   2    3.07    0.60
  -6 -10   2    3.08    0.53
  -6 -10   2    5.16    0.44
  -6 -10   2    5.12    0.44
  -6 -10   2    4.98    0.89
   6 -10  -2    7.39    0.60
  -6  10   2    2.62    0.58
  -5 -10   2    6.51    0.50
   5 -10  -2    6.92    0.62
  -5 -10   2    6.05    0.61
  -5 -10   2    7.32    0.92
  -5 -10   2    6.70    0.50
  -5  10   2    7.72    0.99
  -5  10   2    7.03    0.73
  -4 -10   2    1.59    0.45
  -4 -10   2    1.29    0.18
  -4 -10   2    1.21    0.26
   4 -10  -2    1.71    0.25
  -4  10   2    1.38    0.49
  -4  10   2    1.34    0.35
   3 -10  -2    6.64    0.56
  -3 -10   2    8.05    0.60
  -3 -10   2    7.24    0.51
  -3 -10   2    6.50    0.49
  -3  10   2    7.79    0.66
  -3  10   2    8.23    0.45
  -2 -10   2    5.21    0.36
   2 -10  -2    5.63    0.40
  -2 -10   2    5.33    0.38
   2 -10  -2    4.20    0.79
   2  10  -2    4.55    0.69
  -2  10   2    5.48    0.49
   2  10  -2    4.71    0.49
  -2  10   2    5.83    0.33
   1 -10  -2   31.94    1.95
  -1 -10   2   31.10    1.93
  -1 -10   2   31.16    1.87
   1  10  -2   31.70    2.04
  -1  10   2   33.65    2.05
   0 -10  -2    1.03    0.11
   0 -10   2    0.98    0.11
   0 -10   2    1.30    0.12
   0  10   2    0.90    0.15
   0  10  -2    1.23    0.16
   0  10  -2    1.01    0.16
   0  10   2    1.15    0.12
   1 -10   2    2.79    0.20
  -1 -10  -2    3.32    0.23
   1 -10   2    3.81    0.29
  -1 -10  -2    2.67    0.29
  -1  10  -2    2.83    0.37
   1  10   2    2.37    0.22
  -1  10  -2    2.72    0.27
   1  10   2    2.81    0.26
   2 -10   2   10.90    0.64
  -2 -10  -2   10.85    0.70
   2 -10   2   10.96    0.77
   2  10   2   10.45    0.73
  -2  10  -2   10.63    1.03
  -2  10  -2   10.98    0.77
  -3 -10  -2   20.95    1.22
  -3 -10  -2   20.81    1.27
   3 -10   2   20.55    1.35
  -3 -10  -2   19.81    1.71
  -3  10  -2   20.07    1.78
  -3  10  -2   20.07    1.38
   3  10   2   17.94    1.35
   4 -10   2    9.07    0.73
  -4 -10  -2    9.44    0.63
  -4 -10  -2    9.00    0.96
  -4  10  -2    7.84    0.75
  -4  10  -2    8.06    1.01
   5 -10   2    1.01    0.30
  -5 -10  -2    0.93    0.47
  -5 -10  -2    0.67    0.19
  -5 -10  -2    1.20    0.27
  -5  10  -2    0.82    0.32
  -5  10  -2    1.67    0.56
   5  10   2    0.82    0.16
  -6 -10  -2    3.82    0.77
  -6 -10  -2    2.26    0.30
  -6 -10  -2    2.03    0.38
  -6  10  -2    3.86    0.81
  -6  10  -2    1.49    0.48
  -7 -10  -2    1.58    0.60
  -7 -10  -2    0.70    0.33
   7 -10   2    1.44    0.38
   7  10   2    0.26    0.36
  -7  10  -2    1.35    0.46
  -7  10  -2    1.15    0.65
   7  10   2    1.35    0.21
   8 -10   2   10.11    0.98
  -8 -10  -2    9.92    1.37
  -8  10  -2    9.46    1.56
   8  10   2   11.04    1.03
  -8  10  -2   10.50    1.09
   9 -10   2    0.54    0.40
  -9 -10  -2   -0.07    0.63
  -9  10  -2    0.78    0.50
   9  10   2    0.48    0.45
  -9  10  -2    0.12    0.71
  -9 -11   2    0.08    0.41
   9 -11  -2   -0.08    0.98
  -9  11   2   -0.73    0.38
   9  11  -2    1.76    1.04
  -8 -11   2    0.57    0.37
   8 -11  -2    2.26    1.22
   8 -11  -2    1.48    0.35
  -8  11   2    0.32    0.46
   8  11  -2   -0.05    0.94
  -7 -11   2   -0.12    0.16
   7 -11  -2    0.07    0.25
  -7 -11   2    0.24    0.31
   7 -11  -2    1.22    0.96
  -7  11   2   -0.25    0.37
   7  11  -2    0.31    0.84
   7  11  -2   -0.08    0.27
  -6 -11   2    3.24    0.36
   6 -11  -2    4.60    0.50
  -6 -11   2    4.10    0.38
  -6 -11   2    3.42    0.50
  -6  11   2    4.06    0.64
  -5 -11   2    1.19    0.49
  -5 -11   2    1.26    0.29
  -5 -11   2    0.88    0.19
   5 -11  -2    1.23    0.26
  -5  11   2    1.31    0.56
  -5  11   2    0.99    0.40
  -4 -11   2    3.28    0.32
   4 -11  -2    3.20    0.37
  -4 -11   2    4.40    0.44
  -4 -11   2    3.33    0.29
  -4 -11   2    4.15    0.63
  -4  11   2    3.23    0.47
  -4  11   2    3.18    0.65
  -3 -11   2    7.07    0.49
  -3 -11   2    7.32    0.50
   3 -11  -2    5.90    1.08
   3 -11  -2    6.94    0.55
  -3  11   2    7.91    0.44
  -3  11   2    6.81    0.64
   2 -11  -2    0.56    0.12
  -2 -11   2    0.59    0.09
  -2 -11   2    0.20    0.10
   2 -11  -2    0.83    0.46
  -2  11   2    0.63    0.07
  -2  11   2    0.57    0.20
   2  11  -2    0.13    0.20
   2  11  -2    0.57    0.32
  -1 -11   2    1.17    0.12
   1 -11  -2    1.12    0.12
  -1 -11   2    1.08    0.13
  -1  11   2    1.22    0.20
   1  11  -2    0.90    0.16
   1  11  -2    1.25    0.18
   0 -11  -2   67.31    4.49
   0 -11   2   75.96    4.49
   0  11   2   74.57    4.64
   0  11   2   88.07    4.32
   0  11  -2   65.79    4.65
  -1 -11  -2    0.54    0.13
   1 -11   2    0.14    0.05
  -1 -11  -2    0.16    0.06
   1 -11   2    0.25    0.10
   1  11   2    0.10    0.10
  -1  11  -2    0.17    0.17
   1  11   2    0.13    0.07
  -1  11  -2    0.18    0.11
   2 -11   2    8.26    0.51
   2 -11   2    9.24    0.65
  -2 -11  -2    8.51    0.57
   2  11   2    8.44    0.60
  -2  11  -2    8.56    0.65
  -2  11  -2    8.84    0.88
   3 -11   2   12.34    0.89
  -3 -11  -2   13.17    0.78
  -3 -11  -2   13.00    0.81
  -3 -11  -2   11.95    1.12
  -3  11  -2   12.01    0.90
  -3  11  -2   11.65    1.19
   3  11   2   10.76    0.88
   4 -11   2    1.11    0.26
  -4 -11  -2    0.98    0.17
  -4 -11  -2    2.01    0.46
  -4  11  -2    0.75    0.46
  -4  11  -2    1.13    0.29
  -5 -11  -2    6.85    0.87
  -5 -11  -2    7.46    0.59
   5 -11   2    5.58    0.64
  -5 -11  -2    7.27    0.54
  -5  11  -2    5.83    1.00
   5  11   2    6.10    0.49
  -5  11  -2    7.12    0.71
  -6 -11  -2   10.63    0.89
  -6 -11  -2    9.78    1.25
  -6 -11  -2   10.55    0.80
   6 -11   2   12.21    0.96
   6  11   2   10.73    0.75
  -6  11  -2   11.65    1.02
  -6  11  -2   11.34    1.35
   7 -11   2    0.33    0.29
  -7 -11  -2   -0.27    0.25
  -7 -11  -2    0.55    0.53
   7  11   2   -0.17    0.13
  -7  11  -2   -0.05    0.50
  -7  11  -2   -0.07    0.34
  -8 -11  -2    3.08    0.84
   8 -11   2    4.12    0.59
  -8  11  -2    2.82    0.92
  -8  11  -2    2.61    0.63
   8  11   2    3.22    0.61
   9 -11   2    0.53    0.39
  -9 -11  -2    0.48    0.68
  -9  11  -2   -0.24    0.43
  -9  11  -2    1.04    0.74
   9  11   2    0.20    0.43
  -9 -12   2   -0.39    0.37
   9 -12  -2    1.48    1.15
   9  12  -2    0.81    0.95
  -9  12   2    0.19    0.47
   8 -12  -2    0.68    0.29
  -8 -12   2    0.18    0.34
   8 -12  -2    0.18    0.97
  -8  12   2    0.72    0.47
   8  12  -2    0.51    0.92
   7 -12  -2    0.64    0.27
   7 -12  -2    0.25    0.89
  -7 -12   2    0.32    0.32
  -7 -12   2    0.35    0.18
   7  12  -2    0.27    0.82
   7  12  -2    0.96    0.35
  -7  12   2    0.08    0.37
  -6 -12   2    0.22    0.29
  -6 -12   2    0.24    0.17
   6 -12  -2    0.37    0.23
  -6 -12   2    0.23    0.15
  -6  12   2    0.52    0.37
  -5 -12   2    0.38    0.13
  -5 -12   2    0.49    0.39
  -5 -12   2    0.27    0.25
   5 -12  -2    0.04    0.18
  -5 -12   2    0.19    0.14
  -5  12   2    0.56    0.34
   4 -12  -2    4.12    0.42
  -4 -12   2    3.50    0.37
  -4 -12   2    6.09    0.50
  -4  12   2    4.81    0.58
  -3 -12   2    7.76    0.53
  -3 -12   2    7.54    0.55
   3 -12  -2    8.15    1.25
   3 -12  -2    7.58    0.59
  -3  12   2    8.73    0.48
   3  12  -2    7.03    0.72
   3  12  -2    8.20    1.03
  -3  12   2    7.89    0.70
  -2 -12   2    3.64    0.33
   2 -12  -2    3.57    0.75
   2 -12  -2    4.09    0.33
  -2 -12   2    3.98    0.29
  -2  12   2    4.23    0.26
   2  12  -2    3.97    0.42
   2  12  -2    3.34    0.57
  -2  12   2    3.84    0.42
  -1 -12   2   13.39    0.85
   1 -12  -2   14.00    0.88
  -1 -12   2   14.40    0.87
   1  12  -2   14.70    0.94
  -1  12   2   14.47    0.96
   1  12  -2   12.71    1.09
   0 -12   2    0.02    0.06
   0 -12  -2    0.23    0.15
   0 -12  -2    0.05    0.06
   0 -12   2    0.11    0.06
   0  12   2   -0.01    0.05
   0  12  -2    0.04    0.10
   0  12  -2    0.11    0.11
   0  12   2    0.13    0.11
  -1 -12  -2    0.09    0.06
  -1 -12  -2    0.03    0.10
   1 -12   2    0.06    0.05
   1 -12   2    0.08    0.09
  -1  12  -2    0.04    0.12
   1  12   2    0.00    0.07
  -1  12  -2   -0.06    0.16
   1  12   2    0.07    0.10
  -2 -12  -2   15.50    0.98
   2 -12   2   16.87    1.08
  -2 -12  -2   15.72    1.02
   2 -12   2   15.60    0.95
  -2  12  -2   16.74    1.11
  -2  12  -2   15.73    1.42
   2  12   2   16.99    1.06
  -3 -12  -2    0.34    0.10
  -3 -12  -2    0.30    0.10
   3 -12   2    0.63    0.21
   3  12   2    0.06    0.16
  -3  12  -2    0.36    0.20
  -3  12  -2   -0.09    0.31
   4 -12   2   -0.09    0.17
  -4 -12  -2   -0.08    0.10
  -4 -12  -2   -0.58    0.24
  -4  12  -2    0.34    0.23
   4  12   2   -0.22    0.19
  -4  12  -2   -0.07    0.37
  -5 -12  -2    1.19    0.48
  -5 -12  -2    1.19    0.21
   5 -12   2    0.68    0.28
   5  12   2    1.22    0.19
  -5  12  -2    1.25    0.53
  -5  12  -2    0.52    0.33
   6 -12   2    1.00    0.33
  -6 -12  -2    0.74    0.21
  -6 -12  -2    1.66    0.61
  -6 -12  -2    1.36    0.31
  -6  12  -2    1.51    0.66
   6  12   2    1.07    0.20
  -6  12  -2    0.32    0.38
  -7 -12  -2   -0.29    0.49
  -7 -12  -2   -0.05    0.16
  -7 -12  -2    0.00    0.28
   7 -12   2   -0.31    0.26
  -7  12  -2    0.13    0.34
  -7  12  -2    0.38    0.58
   7  12   2    0.44    0.16
   8 -12   2    0.62    0.35
  -8 -12  -2   -0.21    0.55
   8  12   2    0.28    0.39
  -8  12  -2    0.25    0.43
  -8  12  -2    0.38    0.64
  -9 -12  -2   -0.34    0.58
   9 -12   2   -0.08    0.32
   9  12   2   -0.39    0.39
  -9  12  -2   -0.51    0.64
  -9  12  -2    0.35    0.48
   9 -13  -2    1.49    1.11
  -9 -13   2    0.21    0.42
   9  13  -2    1.59    1.01
  -9  13   2    0.72    0.54
   8 -13  -2    1.19    0.35
  -8 -13   2    0.48    0.40
   8 -13  -2    1.89    1.12
   8  13  -2    0.57    0.99
  -8  13   2    1.80    0.58
   7 -13  -2    0.69    0.27
  -7 -13   2    0.40    0.18
  -7 -13   2   -0.16    0.30
   7 -13  -2    0.06    0.95
  -7 -13   2    0.27    0.16
  -7  13   2    0.28    0.42
   7  13  -2    1.19    0.88
  -6 -13   2    0.43    0.28
   6 -13  -2    0.51    0.83
  -6 -13   2    1.94    0.24
  -6 -13   2    1.17    0.21
   6 -13  -2    1.14    0.26
  -6  13   2   -0.01    0.35
  -5 -13   2    4.91    0.53
   5 -13  -2    4.41    0.47
  -5 -13   2    4.16    0.37
  -5 -13   2    4.40    0.40
  -5  13   2    4.34    0.62
  -4 -13   2    1.13    0.18
  -4 -13   2    1.10    0.16
   4 -13  -2    1.00    0.22
  -4  13   2    1.24    0.32
  -3 -13   2    1.68    0.19
   3 -13  -2    1.80    0.23
   3 -13  -2    1.73    0.64
  -3 -13   2    1.92    0.19
   3  13  -2    0.90    0.51
  -3  13   2    1.77    0.14
   3  13  -2    1.10    0.31
  -3  13   2    1.68    0.32
  -2 -13   2   11.61    0.72
   2 -13  -2    7.48    1.19
   2 -13  -2   12.35    0.75
  -2 -13   2   10.81    0.72
  -2  13   2   11.22    0.85
   2  13  -2   10.87    0.83
  -2  13   2   12.06    0.68
  -1 -13   2   34.23    2.14
  -1 -13   2   36.56    2.22
   1 -13  -2   34.12    2.23
  -1  13   2   38.76    2.35
   1  13  -2   39.26    2.33
   0 -13  -2    2.56    0.38
   0 -13   2    3.25    0.26
   0 -13  -2    2.81    0.25
   0 -13   2    4.06    0.27
   0  13  -2    2.73    0.31
   0  13   2    2.85    0.29
   0  13  -2    4.12    0.33
   0  13   2    3.52    0.25
  -1 -13  -2   65.39    3.75
   1 -13   2   63.24    3.59
  -1 -13  -2   62.74    4.78
  -1  13  -2   60.59    4.83
  -1  13  -2   60.39    3.90
   1  13   2   60.33    3.61
   1  13   2   60.32    3.88
  -2 -13  -2    6.59    0.45
  -2 -13  -2    6.81    0.62
   2 -13   2    5.95    0.39
  -2 -13  -2    6.48    0.44
   2 -13   2    6.19    0.51
   2  13   2    6.48    0.47
  -2  13  -2    6.05    0.53
  -2  13  -2    5.42    0.70
   3 -13   2    1.07    0.23
  -3 -13  -2    1.53    0.18
  -3 -13  -2    1.50    0.18
  -3  13  -2    1.84    0.44
  -3  13  -2    1.24    0.26
   3  13   2    1.36    0.24
  -4 -13  -2    2.59    0.54
  -4 -13  -2    2.54    0.28
   4 -13   2    3.01    0.38
  -4  13  -2    2.86    0.42
   4  13   2    3.14    0.40
  -4  13  -2    2.92    0.64
  -5 -13  -2    0.30    0.15
  -5 -13  -2    0.05    0.40
   5 -13   2    0.03    0.23
   5  13   2    0.40    0.15
  -5  13  -2    0.14    0.47
   5  13   2    0.04    0.27
  -5  13  -2    0.31    0.31
  -6 -13  -2    0.45    0.48
   6 -13   2    0.85    0.30
  -6 -13  -2    0.36    0.17
   6  13   2    0.31    0.15
  -6  13  -2    0.48    0.36
  -6  13  -2    0.54    0.56
  -7 -13  -2    0.85    0.52
  -7 -13  -2   -0.27    0.27
  -7 -13  -2    0.46    0.19
   7 -13   2    0.18    0.29
   7  13   2    0.14    0.15
  -7  13  -2    0.13    0.37
  -7  13  -2   -0.28    0.50
  -8 -13  -2    0.84    0.67
   8 -13   2    1.38    0.41
  -8  13  -2    1.07    0.72
   8  13   2    0.44    0.39
  -8  13  -2    0.55    0.48
  -9 -13  -2    0.89    0.67
   9 -13   2    0.60    0.37
  -9  13  -2    0.23    0.78
  -9  13  -2    0.27    0.45
   9  13   2   -0.60    0.38
   9 -14  -2    0.14    1.04
  -9  14   2    0.24    0.49
   8 -14  -2    0.67    0.30
   8 -14  -2    0.00    1.01
  -8 -14   2   -0.11    0.35
  -8  14   2    0.37    0.46
   8  14  -2    2.13    1.05
   7 -14  -2    0.11    0.24
  -7 -14   2    0.32    0.18
   7 -14  -2   -0.21    0.82
  -7 -14   2   -0.24    0.29
  -7 -14   2    0.19    0.16
   7  14  -2    0.17    0.77
  -7  14   2   -0.48    0.31
   6 -14  -2    1.44    0.28
  -6 -14   2    1.13    0.20
  -6 -14   2    0.18    0.30
  -6 -14   2    1.39    0.22
   6 -14  -2    0.57    0.82
   6  14  -2    0.46    0.73
  -6  14   2    0.26    0.35
  -5 -14   2    0.47    0.18
  -5 -14   2    1.43    0.19
   5 -14  -2    1.05    0.24
  -5  14   2    0.67    0.34
   4 -14  -2   -0.47    0.60
  -4 -14   2    0.33    0.11
  -4 -14   2    0.18    0.13
   4 -14  -2    0.31    0.16
  -4  14   2    0.31    0.28
   4  14  -2    0.24    0.26
   4  14  -2    0.65    0.56
   3 -14  -2    6.04    1.08
   3 -14  -2    7.10    0.55
  -3 -14   2    7.47    0.52
  -3 -14   2    7.25    0.50
   3  14  -2    5.95    0.93
  -3  14   2    7.56    0.65
  -3  14   2    7.76    0.44
   3  14  -2    6.73    0.64
  -2 -14   2   12.16    0.80
   2 -14  -2   12.45    0.82
  -2 -14   2   12.52    0.80
  -2  14   2   12.61    0.75
  -2  14   2   12.16    0.93
   2  14  -2   14.08    0.92
  -1 -14   2    0.97    0.12
  -1 -14   2    0.75    0.12
   1 -14  -2    0.68    0.12
   1  14  -2    0.78    0.17
  -1  14   2    0.61    0.18
   0 -14   2   15.08    0.81
   0 -14   2   11.68    0.83
   0 -14  -2   10.92    0.83
   0  14   2   14.98    0.81
   0  14  -2   14.69    1.05
   0  14  -2   10.51    0.90
   0  14   2   13.63    0.90
  -1 -14  -2    3.89    0.37
   1 -14   2    3.46    0.28
  -1 -14  -2    4.27    0.30
   1 -14   2    4.30    0.33
   1  14   2    4.27    0.36
  -1  14  -2    3.49    0.46
   1  14   2    3.19    0.30
  -1  14  -2    3.51    0.36
  -2 -14  -2   17.47    1.43
   2 -14   2   17.13    1.02
  -2 -14  -2   16.43    1.06
  -2 -14  -2   17.17    1.09
   2 -14   2   16.75    1.14
  -2  14  -2   17.60    1.52
  -2  14  -2   16.96    1.18
   2  14   2   18.43    1.14
  -3 -14  -2    8.03    0.51
   3 -14   2    6.68    0.59
  -3 -14  -2    7.23    0.51
   3  14   2    7.19    0.56
  -3  14  -2    6.32    0.84
  -3  14  -2    6.31    0.60
  -4 -14  -2    3.72    0.34
  -4 -14  -2    4.78    0.67
   4 -14   2    4.49    0.47
  -4  14  -2    3.45    0.70
   4  14   2    3.39    0.44
  -4  14  -2    3.63    0.49
   5 -14   2    0.28    0.25
  -5 -14  -2    0.30    0.15
  -5 -14  -2    0.60    0.41
   5  14   2    0.50    0.29
  -5  14  -2    0.34    0.28
   5  14   2    0.29    0.14
  -5  14  -2    0.42    0.47
  -6 -14  -2    2.54    0.33
  -6 -14  -2    4.72    0.80
   6 -14   2    2.83    0.45
  -6  14  -2    4.23    0.84
   6  14   2    2.12    0.46
  -6  14  -2    2.85    0.53
   6  14   2    2.93    0.31
   7 -14   2    0.03    0.27
  -7 -14  -2    0.05    0.48
  -7 -14  -2   -0.28    0.15
  -7  14  -2    0.24    0.35
   7  14   2    0.02    0.14
  -7  14  -2    0.20    0.55
   8 -14   2   -0.05    0.30
  -8 -14  -2    0.14    0.57
  -8  14  -2   -1.01    0.54
  -8  14  -2   -0.18    0.43
   8  14   2    0.44    0.40
   9 -14   2   -0.59    0.31
  -9 -14  -2   -0.03    0.64
  -9  14  -2   -0.69    0.67
   9  14   2   -0.34    0.36
  -9  14  -2   -0.32    0.46
   9 -15  -2    0.97    1.19
  -9  15   2    0.01    0.48
   8 -15  -2    1.37    1.21
   8 -15  -2    0.15    0.26
  -8 -15   2    0.14    0.22
  -8  15   2    0.23    0.47
   8  15  -2    1.29    0.94
   7 -15  -2    0.41    0.25
  -7 -15   2    0.30    0.17
   7 -15  -2   -0.76    0.74
  -7 -15   2    0.18    0.18
  -7  15   2   -0.62    0.30
   7  15  -2   -0.12    0.76
   6 -15  -2    1.52    0.97
  -6 -15   2    2.25    0.28
  -6 -15   2    2.21    0.27
   6 -15  -2    2.33    0.35
  -6  15   2    1.27    0.46
   6  15  -2    1.54    0.83
   5 -15  -2    2.73    0.36
  -5 -15   2    2.36    0.29
  -5 -15   2    2.48    0.27
   5 -15  -2    2.90    0.96
   5  15  -2    2.21    0.82
   5  15  -2    2.51    0.50
  -5  15   2    2.93    0.52
   4 -15  -2    2.77    0.85
  -4 -15   2    2.32    0.23
   4 -15  -2    2.06    0.28
  -4 -15   2    1.70    0.23
   4  15  -2    1.95    0.67
   4  15  -2    2.54    0.43
  -4  15   2    1.42    0.36
  -3 -15   2   10.00    0.66
   3 -15  -2    9.53    0.69
   3 -15  -2    7.50    1.28
  -3 -15   2   10.13    0.65
  -3  15   2   10.35    0.59
   3  15  -2    8.69    1.09
  -3  15   2    9.61    0.80
   3  15  -2   10.08    0.82
  -2 -15   2   -0.14    0.09
   2 -15  -2   -0.01    0.08
  -2 -15   2    0.03    0.06
   2 -15  -2    0.00    0.39
  -2  15   2   -0.07    0.05
   2  15  -2    0.02    0.26
  -2  15   2   -0.05    0.18
   2  15  -2   -0.14    0.14
  -1 -15   2    0.06    0.07
   1 -15  -2    0.07    0.07
  -1 -15   2   -0.09    0.08
  -1  15   2   -0.11    0.15
   1  15  -2   -0.42    0.13
   0 -15   2    8.63    0.62
   0 -15  -2    7.49    0.83
   0 -15  -2    8.35    0.63
   0 -15   2   11.62    0.62
   0  15   2    9.98    0.70
   0  15   2   11.54    0.61
   0  15  -2   11.04    0.79
   0  15  -2    7.33    0.69
  -1 -15  -2    0.11    0.08
   1 -15   2    0.02    0.07
   1 -15   2   -0.06    0.09
  -1 -15  -2    0.20    0.12
   1  15   2   -0.02    0.08
  -1  15  -2   -0.10    0.19
   1  15   2   -0.09    0.13
  -1  15  -2    0.09    0.14
  -2 -15  -2   11.78    0.74
  -2 -15  -2   11.35    0.98
  -2 -15  -2   10.69    0.72
   2 -15   2   11.20    0.79
   2 -15   2   11.02    0.68
  -2  15  -2   11.86    0.83
   2  15   2   11.33    0.78
  -2  15  -2   10.77    1.07
  -3 -15  -2   11.47    0.75
   3 -15   2   10.86    0.83
  -3 -15  -2   11.55    1.04
  -3 -15  -2   12.02    0.74
   3  15   2   11.02    0.80
  -3  15  -2   10.91    1.14
  -3  15  -2    9.98    0.84
  -4 -15  -2    3.87    0.34
   4 -15   2    3.93    0.44
  -4  15  -2    3.17    0.71
   4  15   2    4.14    0.45
  -4  15  -2    2.92    0.45
  -5 -15  -2    2.23    0.27
  -5 -15  -2    3.38    0.61
   5 -15   2    1.79    0.37
  -5  15  -2    1.58    0.59
   5  15   2    1.72    0.38
  -5  15  -2    2.49    0.46
   5  15   2    1.96    0.26
  -6 -15  -2    2.72    0.68
   6 -15   2    1.90    0.40
  -6 -15  -2    1.76    0.27
   6  15   2    1.81    0.26
   6  15   2    1.79    0.42
  -6  15  -2    2.17    0.49
  -6  15  -2    2.08    0.71
   7 -15   2    0.76    0.34
  -7 -15  -2    0.70    0.53
  -7 -15  -2    0.67    0.22
   7  15   2    1.00    0.21
  -7  15  -2    1.21    0.66
  -7  15  -2    1.08    0.46
  -8 -15  -2   -0.37    0.53
   8 -15   2    0.13    0.30
   8  15   2   -0.39    0.34
  -8  15  -2   -0.72    0.54
  -8  15  -2    0.00    0.41
   9 -15   2    0.22    0.35
  -9  15  -2   -0.10    0.43
   9  15   2    0.67    0.44
  -9  15  -2    0.88    0.79
   9 -16  -2    2.34    1.28
  -9  16   2   -0.27    0.49
  -8 -16   2   -0.06    0.21
   8 -16  -2    0.22    0.26
   8 -16  -2    0.39    1.08
   8  16  -2    0.66    0.47
  -8  16   2   -0.14    0.44
  -7 -16   2    1.20    0.24
  -7 -16   2    1.17    0.24
   7 -16  -2    1.20    0.31
   7 -16  -2    0.71    1.01
  -7  16   2    1.01    0.47
   7  16  -2    1.44    0.49
   7  16  -2    0.64    0.87
   6 -16  -2    0.67    0.88
  -6 -16   2    1.82    0.27
   6 -16  -2    1.55    0.31
  -6 -16   2    1.70    0.23
   6  16  -2    1.09    0.44
  -6  16   2    1.00    0.41
   6  16  -2    1.04    0.77
  -5 -16   2    0.02    0.11
   5 -16  -2    0.81    0.78
   5 -16  -2   -0.09    0.18
  -5 -16   2   -0.12    0.14
   5  16  -2   -0.02    0.63
  -5  16   2   -0.02    0.29
   5  16  -2   -0.23    0.33
   4 -16  -2    0.81    0.70
   4 -16  -2    0.39    0.17
  -4 -16   2    0.57    0.15
  -4 -16   2    0.63    0.13
   4  16  -2    0.73    0.32
   4  16  -2    0.06    0.49
  -4  16   2    0.40    0.26
  -3 -16   2    6.91    0.48
   3 -16  -2    7.27    0.52
  -3 -16   2    6.57    0.49
   3 -16  -2    6.61    1.13
  -3  16   2    7.49    0.42
   3  16  -2    6.98    0.65
  -3  16   2    6.13    0.62
   3  16  -2    5.01    0.85
   2 -16  -2    4.16    0.35
   2 -16  -2    3.30    0.74
  -2 -16   2    4.15    0.31
  -2 -16   2    4.10    0.36
   2  16  -2    3.34    0.49
   2  16  -2    4.78    0.42
  -2  16   2    4.24    0.29
  -2  16   2    5.23    0.47
  -1 -16   2    5.11    0.43
  -1 -16   2    5.79    0.42
   1 -16  -2    5.39    0.43
  -1  16   2    7.02    0.41
  -1  16   2    6.48    0.51
   1  16  -2    6.72    0.50
   0 -16   2    0.08    0.08
   0 -16   2   -0.04    0.09
   0 -16  -2    0.20    0.09
   0 -16  -2    0.18    0.17
   0  16   2    0.11    0.08
   0  16  -2    0.17    0.12
   0  16  -2    0.03    0.15
   0  16   2    0.17    0.15
  -1 -16  -2   14.99    1.16
   1 -16   2   16.98    0.95
   1 -16   2   12.97    0.88
  -1 -16  -2   15.52    0.93
  -1  16  -2   12.55    1.22
   1  16   2   14.28    0.99
  -1  16  -2   14.43    1.02
   1  16   2   14.00    0.90
  -2 -16  -2   -0.05    0.08
   2 -16   2   -0.15    0.11
  -2 -16  -2   -0.20    0.10
  -2 -16  -2    0.04    0.17
   2 -16   2   -0.02    0.06
   2  16   2    0.12    0.15
  -2  16  -2   -0.11    0.16
  -2  16  -2   -0.14    0.27
  -3 -16  -2    7.71    0.53
  -3 -16  -2    6.77    0.75
  -3 -16  -2    7.46    0.53
   3 -16   2    7.23    0.61
  -3  16  -2    6.88    0.87
  -3  16  -2    7.71    0.65
   3  16   2    8.01    0.58
  -4 -16  -2   -0.13    0.11
   4 -16   2   -0.08    0.17
  -4  16  -2    0.01    0.21
   4  16   2    0.15    0.20
  -4  16  -2    0.10    0.37
   5 -16   2    0.16    0.23
  -5 -16  -2    0.15    0.14
  -5 -16  -2   -0.34    0.32
   5  16   2    0.08    0.14
  -5  16  -2   -0.20    0.28
   5  16   2   -0.01    0.26
  -5  16  -2    0.99    0.54
  -6 -16  -2    2.37    0.63
  -6 -16  -2    1.95    0.28
   6 -16   2    1.85    0.40
  -6  16  -2    2.12    0.49
  -6  16  -2    2.58    0.71
   6  16   2    2.36    0.46
   6  16   2    1.51    0.25
   7 -16   2   -0.03    0.28
  -7 -16  -2    0.02    0.19
  -7 -16  -2    0.19    0.49
  -7  16  -2   -0.08    0.38
  -7  16  -2    0.06    0.60
   7  16   2    0.36    0.18
   8 -16   2    0.94    0.37
  -8 -16  -2    0.40    0.59
  -8  16  -2    1.10    0.74
  -8  16  -2   -0.17    0.37
   9 -16   2    0.06    0.32
  -9  16  -2   -0.39    0.70
  -9  16  -2   -0.51    0.41
   9  16   2    0.32    0.44
  -9  17   2    0.23    0.47
   8 -17  -2    0.49    0.29
   8 -17  -2    0.64    1.08
  -8 -17   2    0.08    0.23
   8  17  -2    0.60    0.49
  -8  17   2   -0.02    0.47
   7 -17  -2    3.31    1.21
  -7 -17   2    1.29    0.25
  -7 -17   2    0.83    0.20
   7 -17  -2    1.06    0.30
   7  17  -2    0.54    0.43
  -7  17   2    0.74    0.45
   6 -17  -2    0.21    0.20
  -6 -17   2    0.14    0.14
   6 -17  -2    1.21    0.95
  -6 -17   2   -0.38    0.15
  -6  17   2   -0.38    0.29
   6  17  -2    0.48    0.75
   6  17  -2   -0.70    0.31
   5 -17  -2    3.36    0.39
  -5 -17   2    3.72    0.32
   5 -17  -2    2.87    1.06
  -5 -17   2    2.52    0.31
   5  17  -2    1.74    0.81
  -5  17   2    2.84    0.51
   5  17  -2    2.04    0.48
   4 -17  -2    1.74    0.26
   4 -17  -2    0.79    0.75
  -4 -17   2    1.80    0.21
  -4 -17   2    1.95    0.24
  -4  17   2    1.49    0.37
   4  17  -2    2.06    0.64
   4  17  -2    1.77    0.37
   3 -17  -2   -0.08    0.10
   3 -17  -2    0.08    0.49
  -3 -17   2   -0.13    0.10
  -3 -17   2    0.08    0.08
  -3  17   2    0.23    0.23
  -3  17   2    0.05    0.05
   3  17  -2    0.23    0.37
   3  17  -2    0.19    0.22
  -2 -17   2    2.79    0.25
   2 -17  -2    2.67    0.64
   2 -17  -2    2.79    0.27
  -2 -17   2    2.63    0.26
   2  17  -2    3.29    0.39
   2  17  -2    3.48    0.37
  -2  17   2    2.82    0.22
  -2  17   2    3.35    0.39
   1 -17  -2    5.64    0.86
  -1 -17   2    5.99    0.48
   1 -17  -2    6.57    0.49
  -1 -17   2    6.62    0.48
   1  17  -2    8.47    0.58
  -1  17   2    7.46    0.57
  -1  17   2    8.03    0.46
   0 -17   2   16.37    0.91
   0 -17  -2   12.12    0.93
   0 -17   2   12.59    0.93
   0  17  -2   15.41    1.16
   0  17   2   16.86    0.91
   0  17   2   16.81    1.02
   0  17  -2   12.72    1.02
  -1 -17  -2   -0.02    0.07
   1 -17   2   -0.01    0.07
   1 -17   2   -0.13    0.08
  -1 -17  -2   -0.08    0.11
   1  17   2    0.17    0.16
  -1  17  -2    0.07    0.21
  -1  17  -2   -0.06    0.15
   1  17   2    0.01    0.09
   2 -17   2   15.79    1.03
  -2 -17  -2   15.80    0.99
  -2 -17  -2   15.62    1.28
   2 -17   2   14.87    0.92
  -2  17  -2   14.24    1.37
  -2  17  -2   14.99    1.08
   2  17   2   15.82    1.04
  -3 -17  -2    6.71    0.52
  -3 -17  -2    6.61    0.52
   3 -17   2    7.34    0.60
  -3 -17  -2    7.81    0.75
  -3  17  -2    8.18    0.85
   3  17   2    7.71    0.57
  -3  17  -2    7.50    0.65
  -4 -17  -2    2.32    0.27
   4 -17   2    2.34    0.34
  -4  17  -2    2.12    0.38
   4  17   2    2.60    0.34
  -4  17  -2    2.68    0.63
  -5 -17  -2    3.43    0.33
   5 -17   2    2.21    0.40
  -5  17  -2    3.27    0.75
  -5  17  -2    2.73    0.46
   5  17   2    2.54    0.31
   5  17   2    2.88    0.44
   6 -17   2    0.15    0.25
  -6 -17  -2    0.95    0.49
  -6 -17  -2    0.27    0.17
   6  17   2    0.22    0.16
   6  17   2    0.31    0.32
  -6  17  -2    0.04    0.52
  -6  17  -2    0.09    0.33
  -7 -17  -2    0.13    0.19
  -7 -17  -2    0.24    0.49
   7 -17   2    0.46    0.30
  -7  17  -2    1.24    0.66
  -7  17  -2    0.53    0.39
   7  17   2    0.31    0.18
   8 -17   2   -0.06    0.29
  -8 -17  -2    0.29    0.23
   8  17   2    0.00    0.18
  -8  17  -2   -1.18    0.59
  -8  17  -2    0.59    0.43
   9  17   2    0.75    0.49
   8 -18  -2    0.93    0.32
  -8 -18   2    1.05    0.27
   8 -18  -2    0.96    1.17
  -8  18   2    0.81    0.53
   8  18  -2    0.49    0.48
   7 -18  -2    0.39    1.02
  -7 -18   2    0.61    0.22
  -7 -18   2    0.86    0.21
   7 -18  -2    0.80    0.28
   7  18  -2    1.09    0.49
  -7  18   2    0.58    0.45
  -6 -18   2    0.82    0.22
   6 -18  -2    0.76    0.96
  -6 -18   2    1.07    0.20
   6 -18  -2    0.97    0.26
   6  18  -2    0.85    0.75
  -6  18   2    0.65    0.38
   6  18  -2    0.78    0.42
  -5 -18   2    0.81    0.15
  -5 -18   2    0.18    0.16
   5 -18  -2    0.32    0.19
   5 -18  -2    0.51    0.76
   5  18  -2    0.06    0.62
  -5  18   2    0.30    0.29
   5  18  -2   -0.24    0.31
   4 -18  -2    5.45    0.47
  -4 -18   2    6.31    0.41
  -4 -18   2    4.32    0.44
   4 -18  -2    3.77    1.01
   4  18  -2    4.28    0.86
  -4  18   2    4.33    0.59
   4  18  -2    4.54    0.59
  -3 -18   2    1.02    0.17
  -3 -18   2    1.11    0.16
   3 -18  -2    0.62    0.57
   3 -18  -2    1.10    0.18
   3  18  -2    1.41    0.45
  -3  18   2    1.25    0.11
  -3  18   2    1.72    0.34
   3  18  -2    1.34    0.29
   2 -18  -2   20.56    1.29
  -2 -18   2   19.95    1.25
  -2 -18   2   19.41    1.27
  -2  18   2   19.96    1.20
  -2  18   2   19.78    1.41
   2  18  -2   22.65    1.39
  -1 -18   2    1.30    0.16
   1 -18  -2    1.45    0.18
  -1 -18   2    1.27    0.17
   1 -18  -2    0.77    0.42
  -1  18   2    1.23    0.25
  -1  18   2    1.73    0.17
   1  18  -2    1.48    0.24
   0 -18   2    1.12    0.15
   0 -18  -2    1.42    0.18
   0 -18  -2    1.31    0.25
   0 -18   2    1.30    0.16
   0  18   2    1.33    0.16
   0  18   2    1.20    0.22
   0  18  -2    1.18    0.24
  -1 -18  -2    2.67    0.24
   1 -18   2    1.88    0.20
  -1 -18  -2    2.36    0.27
   1 -18   2    3.01    0.26
  -1  18  -2    2.29    0.37
   1  18   2    1.86    0.28
   1  18   2    2.53    0.25
  -1  18  -2    1.91    0.31
   2 -18   2    3.80    0.27
  -2 -18  -2    3.63    0.42
  -2 -18  -2    3.61    0.31
   2 -18   2    3.97    0.36
  -2  18  -2    3.84    0.43
  -2  18  -2    3.33    0.54
   2  18   2    3.61    0.36
  -3 -18  -2    0.19    0.10
  -3 -18  -2    0.06    0.22
   3 -18   2    0.24    0.16
  -3 -18  -2    0.10    0.12
   3  18   2    0.08    0.14
  -3  18  -2   -0.03    0.18
  -3  18  -2   -0.32    0.27
  -4 -18  -2    2.54    0.29
   4 -18   2    2.39    0.36
  -4 -18  -2    2.77    0.52
   4  18   2    2.86    0.37
  -4  18  -2    2.55    0.60
  -4  18  -2    2.61    0.43
  -5 -18  -2    0.00    0.13
   5 -18   2    0.18    0.22
   5  18   2   -0.10    0.14
   5  18   2   -0.04    0.23
  -5  18  -2   -0.04    0.28
  -5  18  -2    0.89    0.50
  -6 -18  -2    0.96    0.52
  -6 -18  -2    0.71    0.21
   6 -18   2    0.26    0.27
   6  18   2    1.01    0.35
   6  18   2    0.27    0.17
  -6  18  -2    0.22    0.53
  -6  18  -2    0.64    0.37
  -7 -18  -2    0.06    0.18
  -7 -18  -2   -0.21    0.50
   7 -18   2   -0.10    0.26
   7  18   2    0.51    0.19
  -7  18  -2    0.10    0.38
  -7  18  -2    0.56    0.62
  -8 -18  -2   -0.05    0.21
   8 -18   2    0.46    0.34
  -8  18  -2    0.54    0.72
   8  18   2    0.23    0.20
  -8  18  -2   -0.12    0.41
   8 -19  -2    1.11    1.06
  -8 -19   2   -0.13    0.21
   8 -19  -2   -0.11    0.24
  -8  19   2   -0.31    0.39
   8  19  -2    0.24    0.45
   7 -19  -2    0.36    0.26
   7 -19  -2    0.09    0.99
  -7 -19   2    0.33    0.17
  -7 -19   2    0.09    0.20
   7  19  -2    0.45    0.42
  -7  19   2   -0.60    0.32
   6 -19  -2    1.06    0.94
  -6 -19   2    2.37    0.28
  -6 -19   2    2.18    0.29
   6 -19  -2    2.02    0.33
  -6  19   2    1.05    0.44
   6  19  -2    1.48    0.46
  -5 -19   2    0.56    0.15
   5 -19  -2   -0.67    0.65
  -5 -19   2    0.43    0.18
   5 -19  -2    0.41    0.19
  -5  19   2    0.43    0.32
   5  19  -2    0.31    0.31
   5  19  -2   -0.25    0.57
  -4 -19   2    1.42    0.18
   4 -19  -2    1.56    0.23
   4 -19  -2    1.82    0.77
  -4 -19   2    1.14    0.21
  -4  19   2    1.02    0.34
   4  19  -2    1.09    0.53
   4  19  -2    0.76    0.33
  -3 -19   2    1.42    0.17
   3 -19  -2    1.53    0.20
  -3 -19   2    1.17    0.19
   3 -19  -2    0.92    0.55
   3  19  -2    1.06    0.27
  -3  19   2    1.39    0.31
   3  19  -2    0.16    0.37
  -3  19   2    1.23    0.12
   2 -19  -2    9.18    0.65
  -2 -19   2    9.11    0.64
  -2 -19   2    9.42    0.64
  -2  19   2    9.51    0.59
  -2  19   2    9.20    0.76
   2  19  -2   10.87    0.74
  -1 -19   2    6.52    0.50
   1 -19  -2    6.60    0.50
  -1 -19   2    6.71    0.50
   1 -19  -2    5.24    0.85
   1  19  -2    8.96    0.61
  -1  19   2    8.34    0.48
  -1  19   2    7.45    0.59
   0 -19   2   36.51    2.25
   0 -19   2   41.07    2.17
   0 -19  -2   31.85    2.25
   0  19   2   41.18    2.17
   0  19  -2   30.20    2.36
   0  19   2   38.26    2.37
  -1 -19  -2    1.70    0.22
   1 -19   2    1.56    0.17
   1 -19   2    1.53    0.19
  -1 -19  -2    1.71    0.18
  -1  19  -2    1.27    0.25
   1  19   2    1.64    0.25
   1  19   2    1.51    0.19
  -1  19  -2    1.74    0.32
   2 -19   2   13.12    0.83
   2 -19   2   13.61    0.92
  -2 -19  -2   13.92    0.90
  -2 -19  -2   14.37    1.15
   2  19   2   13.44    0.96
  -2  19  -2   13.59    1.00
  -2  19  -2   13.98    1.26
  -3 -19  -2    4.00    0.50
  -3 -19  -2    3.07    0.29
   3 -19   2    2.74    0.35
   3  19   2    3.60    0.36
  -3  19  -2    3.11    0.41
  -3  19  -2    3.57    0.61
  -3  19  -2    2.88    0.22
  -4 -19  -2    0.12    0.12
  -4 -19  -2    0.07    0.32
   4 -19   2    0.01    0.17
  -4  19  -2    0.21    0.40
   4  19   2   -0.15    0.18
  -4  19  -2    0.35    0.25
   5 -19   2   -0.04    0.21
  -5 -19  -2   -0.19    0.13
  -5  19  -2   -0.36    0.38
   5  19   2   -0.06    0.14
  -5  19  -2   -0.10    0.28
   5  19   2    0.16    0.22
  -6 -19  -2    1.07    0.55
  -6 -19  -2    1.86    0.28
   6 -19   2    2.00    0.39
   6  19   2    2.41    0.44
  -6  19  -2    1.97    0.48
   6  19   2    1.91    0.28
  -6  19  -2    2.15    0.70
  -7 -19  -2    0.50    0.20
   7 -19   2    0.19    0.29
  -7  19  -2    0.21    0.39
  -7  19  -2    0.52    0.64
   7  19   2    0.00    0.17
   8 -19   2   -0.28    0.28
  -8 -19  -2    0.29    0.22
  -8  19  -2    0.79    0.49
  -8  19  -2    0.59    0.70
   8  19   2   -0.24    0.16
   8 -20  -2    0.55    1.06
   8 -20  -2    0.03    0.25
  -8 -20   2    0.31    0.22
   8  20  -2    0.19    0.45
  -8  20   2   -0.82    0.36
  -7 -20   2    0.48    0.18
   7 -20  -2    1.15    1.01
  -7 -20   2    1.43    0.26
   7 -20  -2    0.28    0.24
  -7  20   2   -0.31    0.35
   7  20  -2   -0.20    0.37
   6 -20  -2    1.55    0.29
  -6 -20   2    1.33    0.23
   6 -20  -2    2.56    1.05
  -6 -20   2    2.16    0.28
   6  20  -2    0.78    0.41
  -6  20   2    0.94    0.43
  -5 -20   2   -0.05    0.16
   5 -20  -2    0.52    0.76
  -5 -20   2    0.65    0.15
   5 -20  -2    0.34    0.18
   5  20  -2   -0.58    0.28
  -5  20   2    0.17    0.30
  -4 -20   2   -0.11    0.14
   4 -20  -2    0.72    0.73
   4 -20  -2    0.13    0.15
  -4 -20   2    0.33    0.13
   4  20  -2    0.18    0.28
  -4  20   2    0.15    0.29
   3 -20  -2    0.50    0.15
  -3 -20   2    0.60    0.13
   3 -20  -2    0.03    0.51
  -3 -20   2    0.62    0.15
  -3  20   2    0.61    0.27
   3  20  -2    0.89    0.26
  -3  20   2    0.77    0.09
  -2 -20   2    7.30    0.54
   2 -20  -2    7.30    0.54
  -2 -20   2    7.91    0.53
   2  20  -2    8.22    0.63
  -2  20   2    7.83    0.66
  -2  20   2    7.30    0.49
   1 -20  -2    0.88    0.15
  -1 -20   2    1.18    0.15
  -1 -20   2    0.96    0.15
   1 -20  -2    0.50    0.38
  -1  20   2    0.94    0.13
   1  20  -2    1.52    0.25
  -1  20   2    1.18    0.25
   0 -20   2    7.00    0.47
   0 -20  -2    5.99    0.47
   0 -20   2    6.73    0.48
   0 -20  -2    6.07    0.60
   0  20   2    6.13    0.54
   0  20  -2    6.26    0.56
   0  20   2    7.94    0.47
   1 -20   2    7.26    0.46
  -1 -20  -2    6.19    0.44
   1 -20   2    5.57    0.41
  -1 -20  -2    5.75    0.51
  -1  20  -2    4.93    0.60
  -1  20  -2    5.70    0.52
   1  20   2    6.07    0.51
   1  20   2    5.64    0.44
  -2 -20  -2   13.17    0.82
  -2 -20  -2   12.92    1.04
   2 -20   2   10.95    0.75
   2 -20   2   12.25    0.84
  -2  20  -2   12.22    0.92
   2  20   2   12.94    0.90
  -2  20  -2   11.73    1.15
  -3 -20  -2    1.25    0.18
   3 -20   2    1.05    0.22
  -3 -20  -2    1.16    0.31
  -3  20  -2    0.80    0.26
  -3  20  -2    1.14    0.43
   3  20   2    1.14    0.23
  -3  20  -2    0.91    0.10
  -4 -20  -2    0.34    0.33
  -4 -20  -2    0.06    0.12
   4 -20   2   -0.03    0.19
  -4  20  -2   -0.19    0.37
  -4  20  -2    0.11    0.27
   4  20   2    0.41    0.20
  -5 -20  -2    3.89    0.40
   5 -20   2    4.35    0.51
  -5  20  -2    4.74    0.86
   5  20   2    4.45    0.50
   5  20   2    4.52    0.43
  -5  20  -2    4.23    0.60
   6 -20   2    1.90    0.37
  -6 -20  -2    1.21    0.24
  -6  20  -2    1.50    0.67
  -6  20  -2    1.66    0.44
   6  20   2    1.44    0.25
   7 -20   2    1.14    0.37
  -7 -20  -2    1.54    0.28
   7  20   2    1.04    0.24
  -7  20  -2    0.86    0.70
  -7  20  -2    0.60    0.43
   8 -20   2    0.68    0.36
  -8 -20  -2   -0.04    0.20
   8  20   2   -0.45    0.15
  -8  20  -2    0.12    0.42
  -8  20  -2    0.16    0.66
   8 -21  -2    0.25    0.25
   8 -21  -2    1.47    1.06
  -8 -21   2   -0.26    0.21
  -8  21   2    0.29    0.45
  -7 -21   2    0.10    0.16
   7 -21  -2    0.58    0.25
  -7 -21   2   -0.24    0.20
   7 -21  -2    0.19    0.96
  -7  21   2    0.16    0.42
   7  21  -2    0.18    0.41
   6 -21  -2    3.54    0.40
   6 -21  -2    1.94    1.00
  -6 -21   2    3.33    0.37
  -6 -21   2    3.86    0.37
   6  21  -2    2.65    0.55
  -6  21   2    2.23    0.55
   5 -21  -2   -0.32    0.67
  -5 -21   2    0.32    0.18
   5 -21  -2    0.13    0.17
  -5 -21   2    0.43    0.15
  -5  21   2   -0.02    0.31
   5  21  -2    0.92    0.35
  -4 -21   2    9.38    0.69
   4 -21  -2    7.68    1.42
   4 -21  -2    9.46    0.71
  -4 -21   2    9.92    0.68
  -4  21   2    9.74    0.88
   4  21  -2   10.53    0.85
  -3 -21   2    4.90    0.38
   3 -21  -2    4.86    0.41
  -3 -21   2    4.32    0.40
   3 -21  -2    2.98    0.84
   3  21  -2    4.95    0.50
  -3  21   2    4.94    0.32
  -3  21   2    5.34    0.56
  -2 -21   2   -0.01    0.11
  -2 -21   2   -0.01    0.08
   2 -21  -2    0.19    0.10
  -2  21   2    0.07    0.08
  -2  21   2    0.14    0.20
   2  21  -2    0.31    0.18
  -1 -21   2   -0.02    0.08
   1 -21  -2   -0.11    0.09
  -1 -21   2    0.27    0.11
   1 -21  -2    0.01    0.31
  -1  21   2   -0.06    0.07
  -1  21   2   -0.10    0.17
   1  21  -2    0.13    0.19
   0 -21  -2   21.01    1.96
   0 -21   2   25.45    1.56
   0 -21   2   27.71    1.50
   0 -21  -2   21.49    1.55
   0  21   2   27.51    1.67
   0  21  -2   24.07    1.68
   0  21   2   27.22    1.50
  -1 -21  -2    0.45    0.12
   1 -21   2    0.44    0.11
  -1 -21  -2    0.51    0.13
   1 -21   2    0.60    0.13
  -1  21  -2    0.59    0.23
   1  21   2    0.26    0.19
   1  21   2    0.30    0.12
  -1  21  -2    0.48    0.22
   2 -21   2    1.07    0.13
   2 -21   2    0.88    0.17
  -2 -21  -2    1.44    0.24
  -2 -21  -2    0.73    0.15
   2  21   2    0.72    0.22
  -2  21  -2    0.72    0.33
  -2  21  -2    1.11    0.27
  -3 -21  -2    1.18    0.18
  -3 -21  -2    1.40    0.34
   3 -21   2    0.90    0.21
  -3  21  -2    1.45    0.31
  -3  21  -2    1.28    0.44
   3  21   2    1.23    0.25
   4 -21   2   14.57    1.09
  -4 -21  -2   15.71    1.41
  -4 -21  -2   15.36    1.02
  -4  21  -2   15.09    1.54
  -4  21  -2   14.84    1.18
   4  21   2   15.67    1.08
  -5 -21  -2    1.08    0.22
   5 -21   2    1.34    0.31
  -5  21  -2    0.99    0.39
   5  21   2    1.59    0.31
  -5  21  -2    1.34    0.56
   5  21   2    0.80    0.21
  -6 -21  -2    2.69    0.34
   6 -21   2    2.47    0.43
  -6  21  -2    3.58    0.83
   6  21   2    2.62    0.34
  -6  21  -2    2.28    0.53
  -7 -21  -2    0.36    0.20
   7 -21   2    0.98    0.33
  -7  21  -2    0.70    0.40
   7  21   2    0.42    0.21
  -7  21  -2   -0.68    0.60
  -8 -21  -2    0.36    0.24
   8 -21   2    0.05    0.32
   8  21   2    0.29    0.22
  -8  21  -2    0.79    0.71
  -8  21  -2    0.31    0.42
   8 -22  -2    0.37    0.26
  -8 -22   2   -0.02    0.22
   8 -22  -2    1.66    1.09
  -8  22   2   -0.23    0.43
   7 -22  -2    1.22    1.08
  -7 -22   2    0.59    0.24
   7 -22  -2    0.46    0.24
  -7 -22   2    0.36    0.18
  -7  22   2    0.69    0.43
   7  22  -2    0.68    0.42
   6 -22  -2    0.86    0.24
  -6 -22   2    0.61    0.21
  -6 -22   2    0.62    0.19
   6 -22  -2   -0.66    0.83
  -6  22   2    0.57    0.42
   6  22  -2    0.53    0.38
   5 -22  -2    0.59    0.20
  -5 -22   2    0.74    0.17
   5 -22  -2    0.29    0.69
  -5 -22   2    0.69    0.20
  -5  22   2    0.50    0.33
   5  22  -2    0.74    0.34
  -4 -22   2    4.05    0.34
  -4 -22   2    2.60    0.33
   4 -22  -2    3.92    0.98
   4 -22  -2    4.27    0.38
  -4  22   2    3.28    0.53
   4  22  -2    3.75    0.49
   3 -22  -2    7.05    0.53
  -3 -22   2    7.74    0.51
   3 -22  -2    4.26    1.01
  -3 -22   2    6.12    0.52
  -3  22   2    6.87    0.44
  -3  22   2    6.88    0.70
   3  22  -2    7.33    0.63
  -2 -22   2   24.83    1.59
  -2 -22   2   24.48    1.55
   2 -22  -2   24.95    1.60
  -2  22   2   26.42    1.75
  -2  22   2   24.29    1.51
   2  22  -2   28.26    1.72
   1 -22  -2    0.09    0.10
  -1 -22   2    0.03    0.11
  -1 -22   2    0.20    0.10
   1 -22  -2    0.53    0.34
  -1  22   2    0.25    0.10
   1  22  -2    0.52    0.22
  -1  22   2    0.41    0.20
   0 -22  -2    2.38    0.30
   0 -22  -2    1.91    0.24
   0 -22   2    2.89    0.26
   0 -22   2    2.31    0.25
   0  22  -2    2.25    0.34
   0  22   2    2.24    0.32
   0  22   2    3.13    0.26
  -1 -22  -2    2.43    0.28
   1 -22   2    2.71    0.24
   1 -22   2    3.38    0.28
  -1 -22  -2    2.46    0.26
  -1  22  -2    2.80    0.37
   1  22   2    2.71    0.27
   1  22   2    3.13    0.36
  -2 -22  -2   19.28    1.25
  -2 -22  -2   19.49    1.57
   2 -22   2   19.88    1.27
   2 -22   2   18.16    1.16
   2  22   2   19.41    1.22
   2  22   2   19.96    1.34
  -2  22  -2   20.92    1.39
  -2  22  -2   18.75    1.68
  -3 -22  -2    0.22    0.12
   3 -22   2    0.15    0.16
   3  22   2    0.39    0.22
  -3  22  -2    0.35    0.26
  -3  22  -2    0.06    0.31
   4 -22   2    6.43    0.60
  -4 -22  -2    6.85    0.53
  -4  22  -2    7.33    0.91
   4  22   2    6.28    0.54
  -4  22  -2    7.77    0.70
   4  22   2    6.62    0.58
   5 -22   2    0.09    0.21
  -5 -22  -2   -0.04    0.14
  -5  22  -2    0.00    0.27
   5  22   2    0.19    0.21
  -5  22  -2   -0.23    0.44
   5  22   2   -0.02    0.16
   6 -22   2    0.38    0.27
  -6 -22  -2    0.08    0.17
  -6  22  -2   -0.24    0.49
   6  22   2    0.20    0.17
  -6  22  -2   -0.11    0.32
  -7 -22  -2    0.81    0.24
   7 -22   2    1.07    0.36
   7  22   2    0.73    0.23
  -7  22  -2    0.30    0.66
  -7  22  -2    0.40    0.45
  -8 -22  -2    0.06    0.21
   8 -22   2    1.10    0.36
  -8  22  -2    0.30    0.45
  -8  22  -2    0.43    0.69
   8  22   2    0.16    0.21
  -8 -23   2   -0.17    0.22
   8 -23  -2    0.16    0.23
   8 -23  -2    0.70    1.19
  -8  23   2   -0.31    0.37
  -7 -23   2    1.84    0.31
   7 -23  -2    1.57    1.02
   7 -23  -2    1.75    0.32
  -7 -23   2    1.59    0.27
  -7  23   2    0.92    0.50
   7  23  -2    1.00    0.47
   6 -23  -2    1.09    0.85
  -6 -23   2    0.61    0.21
   6 -23  -2    0.21    0.19
  -6 -23   2    0.50    0.18
  -6  23   2   -0.43    0.31
   6  23  -2   -0.04    0.33
  -5 -23   2    2.54    0.28
  -5 -23   2    1.68    0.28
   5 -23  -2    1.60    0.90
   5 -23  -2    2.51    0.32
   5  23  -2    1.75    0.42
  -5  23   2    1.92    0.48
   4 -23  -2    2.08    0.85
  -4 -23   2    1.48    0.20
   4 -23  -2    1.31    0.22
  -4 -23   2    0.80    0.21
   4  23  -2    1.17    0.31
  -4  23   2    0.44    0.33
  -3 -23   2    3.61    0.38
   3 -23  -2    2.96    0.83
   3 -23  -2    4.01    0.37
  -3 -23   2    3.63    0.33
  -3  23   2    4.29    0.55
   3  23  -2    4.57    0.45
  -2 -23   2    0.99    0.18
  -2 -23   2    0.68    0.14
   2 -23  -2    0.78    0.15
  -2  23   2    0.81    0.28
  -2  23   2    0.70    0.13
   2  23  -2    0.49    0.24
  -1 -23   2   12.17    0.83
   1 -23  -2   11.62    0.83
  -1 -23   2   12.04    0.81
   1 -23  -2    9.77    1.19
  -1  23   2   13.91    0.79
  -1  23   2   12.85    0.94
   1  23  -2   14.53    0.95
   0 -23  -2    1.58    0.22
   0 -23   2    1.73    0.21
   0 -23   2    1.92    0.21
   0 -23  -2    2.17    0.27
   0  23   2    1.95    0.22
   0  23  -2    1.75    0.31
   0  23   2    1.68    0.29
   1 -23   2    0.94    0.38
  -1 -23  -2    1.51    0.19
   1 -23   2    1.46    0.19
   1 -23   2    1.51    0.18
  -1  23  -2    1.46    0.29
   1  23   2    1.37    0.20
   1  23   2    1.43    0.27
   2 -23   2    0.57    0.12
   2 -23   2    0.55    0.16
  -2 -23  -2    0.53    0.14
   2  23   2    0.58    0.16
  -2  23  -2    0.77    0.32
   2  23   2    0.73    0.23
  -2  23  -2    0.81    0.26
  -3 -23  -2    8.90    0.62
   3 -23   2    8.69    0.66
   3  23   2    8.47    0.68
  -3  23  -2    7.83    0.95
  -3  23  -2    8.05    0.75
   3  23   2    8.62    0.63
   4 -23   2    0.23    0.19
  -4 -23  -2   -0.07    0.12
   4  23   2    0.12    0.16
  -4  23  -2    0.37    0.41
  -4  23  -2    0.15    0.26
   4  23   2    0.04    0.20
  -5 -23  -2   -0.15    0.14
   5 -23   2   -0.44    0.19
   5  23   2    0.01    0.16
  -5  23  -2    0.14    0.30
  -5  23  -2   -0.10    0.46
   5  23   2    0.02    0.22
   6 -23   2    0.50    0.28
  -6 -23  -2    0.77    0.21
  -6  23  -2    0.70    0.55
  -6  23  -2    0.22    0.37
   6  23   2    0.31    0.20
  -7 -23  -2    1.44    0.28
   7 -23   2    1.14    0.35
  -7  23  -2    0.90    0.66
  -7  23  -2    0.35    0.42
   7  23   2    1.16    0.26
  -8 -23  -2    0.03    0.22
   8 -23   2    0.45    0.33
   8  23   2    0.68    0.24
  -8  23  -2    0.35    0.44
   8 -24  -2    0.31    0.24
   8 -24  -2    4.06    1.28
  -8  24   2    0.37    0.49
   7 -24  -2    1.38    0.28
  -7 -24   2    1.13    0.25
   7 -24  -2    0.22    1.00
  -7 -24   2    1.04    0.28
  -7  24   2    1.30    0.53
   7  24  -2    1.85    0.50
   6 -24  -2    3.19    1.19
  -6 -24   2    3.17    0.38
  -6 -24   2    3.38    0.36
   6 -24  -2    2.88    0.39
  -6  24   2    1.81    0.55
   6  24  -2    4.00    0.59
  -5 -24   2    2.33    0.32
   5 -24  -2    1.53    0.89
  -5 -24   2    3.46    0.34
   5 -24  -2    3.32    0.36
   5  24  -2    2.85    0.47
  -5  24   2    1.49    0.47
   4 -24  -2    0.48    0.69
   4 -24  -2    0.73    0.18
  -4 -24   2    0.54    0.15
  -4 -24   2    0.60    0.19
  -4  24   2    0.06    0.28
   4  24  -2    0.33    0.27
   3 -24  -2    0.52    0.57
  -3 -24   2    0.59    0.18
   3 -24  -2    0.46    0.15
  -3 -24   2    0.31    0.13
  -3  24   2    0.32    0.27
   3  24  -2    0.50    0.25
   2 -24  -2    4.94    0.41
  -2 -24   2    5.13    0.40
  -2 -24   2    4.70    0.42
  -2  24   2    4.56    0.36
   2  24  -2    5.88    0.53
  -2  24   2    5.64    0.55
  -1 -24   2    1.17    0.17
   1 -24  -2    0.82    0.16
   1 -24  -2    1.48    0.45
  -1 -24   2    0.95    0.17
  -1  24   2    0.77    0.14
  -1  24   2    1.18    0.27
   1  24  -2    1.33    0.29
   0 -24  -2   -0.01    0.10
   0 -24   2   -0.03    0.10
   0 -24  -2    0.24    0.13
   0 -24   2   -0.05    0.09
   0  24   2    0.04    0.10
   0  24   2    0.09    0.20
   0  24  -2    0.05    0.20
   1 -24   2    4.06    0.35
  -1 -24  -2    4.90    0.38
   1 -24   2    2.91    0.57
   1 -24   2    5.07    0.37
  -1  24  -2    3.59    0.47
   1  24   2    5.47    0.48
   1  24   2    4.07    0.38
   2 -24   2    4.83    0.37
   2 -24   2    5.06    0.42
  -2 -24  -2    4.93    0.41
   2  24   2    4.75    0.43
  -2  24  -2    5.01    0.64
   2  24   2    5.17    0.50
  -2  24  -2    5.62    0.54
   3 -24   2    2.86    0.33
  -3 -24  -2    2.19    0.27
   3  24   2    2.01    0.28
  -3  24  -2    2.22    0.40
   3  24   2    1.49    0.32
  -3  24  -2    3.01    0.58
  -4 -24  -2    0.95    0.19
   4 -24   2    0.93    0.24
  -4  24  -2    0.94    0.34
   4  24   2    0.91    0.26
   4  24   2    0.94    0.22
  -4  24  -2    1.11    0.48
   5 -24   2    0.09    0.21
  -5 -24  -2   -0.05    0.15
  -5  24  -2   -0.46    0.38
  -5  24  -2    0.01    0.29
   5  24   2    0.05    0.23
   5  24   2   -0.06    0.15
  -6 -24  -2    5.70    0.53
   6 -24   2    5.86    0.62
   6  24   2    5.80    0.52
  -6  24  -2    5.02    0.75
  -6  24  -2    5.98    1.08
   7 -24   2    0.89    0.33
  -7 -24  -2    0.86    0.24
  -7  24  -2    0.80    0.44
  -7  24  -2    1.09    0.69
   7  24   2    0.61    0.23
   8 -24   2    0.86    0.36
  -8 -24  -2    0.65    0.28
  -8  24  -2    1.17    0.54
   8  24   2    0.60    0.24
   8 -25  -2    0.62    1.09
   8 -25  -2    1.56    0.32
  -8  25   2    1.49    0.59
  -7 -25   2    0.27    0.23
   7 -25  -2   -0.04    0.20
   7 -25  -2    0.94    0.96
  -7 -25   2    0.06    0.18
   7  25  -2    0.58    0.39
  -7  25   2    0.03    0.38
   6 -25  -2    1.45    0.89
  -6 -25   2    0.98    0.22
  -6 -25   2    1.32    0.25
   6 -25  -2    0.97    0.24
   6  25  -2    0.33    0.34
  -6  25   2    0.34    0.41
   5 -25  -2   -0.07    0.70
  -5 -25   2    0.85    0.19
  -5 -25   2    0.30    0.18
   5 -25  -2    0.65    0.20
  -5  25   2   -0.25    0.29
   5  25  -2    0.57    0.30
  -4 -25   2    3.05    0.31
   4 -25  -2    3.09    0.33
  -4 -25   2    2.13    0.31
   4 -25  -2    1.47    0.79
  -4  25   2    2.82    0.50
   4  25  -2    3.86    0.47
  -3 -25   2    0.14    0.15
  -3 -25   2    0.60    0.15
   3 -25  -2    0.40    0.60
   3 -25  -2    0.30    0.15
   3  25  -2    0.56    0.24
  -3  25   2    0.55    0.29
  -2 -25   2    0.77    0.18
   2 -25  -2    0.52    0.48
  -2 -25   2    0.72    0.15
   2 -25  -2    0.60    0.16
  -2  25   2    0.94    0.30
   2  25  -2    0.80    0.27
   1 -25  -2    1.96    0.25
  -1 -25   2    2.32    0.26
  -1 -25   2    2.06    0.24
   1 -25  -2    2.40    0.50
  -1  25   2    2.58    0.25
  -1  25   2    2.38    0.36
   1  25  -2    2.22    0.34
   0 -25  -2    9.93    0.74
   0 -25   2   11.66    0.71
   0 -25   2    9.42    0.73
   0  25  -2   11.41    0.87
   0  25   2   11.52    0.85
   0  25   2   11.24    0.72
   1 -25   2    0.63    0.35
   1 -25   2    0.91    0.15
  -1 -25  -2    0.67    0.15
   1 -25   2    1.23    0.18
   1  25   2    0.89    0.26
  -1  25  -2    0.69    0.26
   1  25   2    0.75    0.17
  -2 -25  -2    7.64    0.62
   2 -25   2    9.06    0.57
   2 -25   2    8.87    0.64
   2  25   2    9.09    0.72
  -2  25  -2    9.81    0.77
   2  25   2    8.54    0.64
   3 -25   2    0.97    0.22
  -3 -25  -2    0.62    0.17
  -3  25  -2    0.73    0.40
  -3  25  -2    1.12    0.34
   3  25   2    0.89    0.27
   3  25   2    0.81    0.19
  -4 -25  -2    5.87    0.47
   4 -25   2    5.30    0.51
   4  25   2    5.36    0.48
  -4  25  -2    6.27    0.92
  -4  25  -2    4.85    0.64
   4  25   2    5.65    0.55
   5 -25   2    0.17    0.22
  -5 -25  -2    0.00    0.15
  -5  25  -2    0.33    0.32
  -5  25  -2    0.70    0.53
   5  25   2    0.22    0.25
   5  25   2    0.27    0.18
  -6 -25  -2    3.90    0.43
   6 -25   2    4.29    0.52
  -6  25  -2    5.04    0.97
   6  25   2    4.65    0.46
  -6  25  -2    3.75    0.66
   7 -25   2    0.13    0.28
  -7 -25  -2    0.02    0.18
  -7  25  -2    0.34    0.60
  -7  25  -2    0.40    0.42
   7  25   2    0.43    0.21
   8 -25   2    0.54    0.94
   8 -25   2    1.09    0.35
  -8 -25  -2    0.88    0.27
  -8  25  -2    0.95    0.52
   8  25   2    0.85    0.27
   8 -26  -2    0.08    0.23
  -8  26   2    0.27    0.46
   7 -26  -2    0.21    0.90
  -7 -26   2    0.19    0.20
  -7 -26   2    0.82    0.28
   7 -26  -2    0.68    0.24
  -7  26   2    0.28    0.43
   7  26  -2    0.19    0.36
  -6 -26   2    2.38    0.31
   6 -26  -2    2.06    0.32
  -6 -26   2    2.85    0.35
   6 -26  -2    0.86    0.91
   6  26  -2    1.83    0.45
  -6  26   2    0.82    0.48
   5 -26  -2    0.26    0.17
  -5 -26   2   -0.27    0.15
  -5 -26   2    0.01    0.13
   5 -26  -2   -0.08    0.69
   5  26  -2    0.35    0.30
  -5  26   2    0.10    0.32
  -4 -26   2    1.24    0.25
   4 -26  -2    0.93    0.73
  -4 -26   2    1.55    0.22
   4 -26  -2    1.86    0.25
  -4  26   2    1.52    0.40
   4  26  -2    1.95    0.36
  -3 -26   2    0.32    0.17
  -3 -26   2    0.51    0.14
   3 -26  -2    0.32    0.15
   3  26  -2    0.52    0.27
  -3  26   2    0.06    0.25
   2 -26  -2   -0.01    0.12
  -2 -26   2   -0.15    0.13
   2 -26  -2   -0.05    0.44
  -2 -26   2    0.20    0.12
  -2  26   2    0.01    0.23
   2  26  -2    0.27    0.25
  -1 -26   2    1.17    0.19
   1 -26  -2    1.41    0.20
  -1 -26   2    1.58    0.21
   1 -26  -2    1.74    0.44
  -1  26   2    1.34    0.18
   1  26  -2    1.38    0.30
  -1  26   2    1.28    0.30
   0 -26  -2    1.38    0.22
   0 -26   2    1.93    0.22
   0 -26   2    1.27    0.20
   0  26  -2    1.45    0.31
   0  26   2    2.32    0.35
   0  26   2    1.98    0.23
  -1 -26  -2   -0.02    0.11
   1 -26   2   -0.02    0.11
   1 -26   2    0.11    0.10
   1  26   2    0.16    0.20
  -1  26  -2    0.04    0.21
   1  26   2   -0.06    0.12
  -2 -26  -2    3.68    0.35
   2 -26   2    3.97    0.36
   2 -26   2    3.45    0.30
  -2  26  -2    3.74    0.49
   2  26   2    3.35    0.44
   2  26   2    3.84    0.38
   3 -26   2    2.12    0.30
  -3 -26  -2    2.49    0.29
  -3  26  -2    2.78    0.56
  -3  26  -2    2.67    0.43
   3  26   2    2.55    0.32
   3  26   2    2.32    0.37
  -4 -26  -2    0.15    0.14
   4 -26   2    0.01    0.17
   4  26   2    0.22    0.24
  -4  26  -2    0.08    0.27
  -4  26  -2    0.27    0.42
   4  26   2   -0.09    0.14
   5 -26   2    1.71    0.32
  -5 -26  -2    2.28    0.31
  -5  26  -2    2.60    0.68
  -5  26  -2    1.23    0.41
   5  26   2    1.38    0.27
   5  26   2    1.91    0.35
   6 -26   2    0.93    0.30
  -6 -26  -2    0.65    0.21
   6  26   2    0.58    0.22
  -6  26  -2    0.79    0.55
  -6  26  -2    1.08    0.45
   7 -26   2    0.51    0.29
  -7 -26  -2    0.33    0.22
  -7  26  -2    0.15    0.43
   7  26   2    0.37    0.22
   8 -26   2    1.16    0.37
   8  26   2    1.12    0.28
  -7 -27   2   -0.01    0.23
   7 -27  -2    0.46    0.23
   7 -27  -2    5.40    1.29
  -7  27   2    0.30    0.42
   7  27  -2   -0.10    0.33
   6 -27  -2    2.46    1.07
  -6 -27   2    2.51    0.34
   6 -27  -2    2.18    0.32
  -6 -27   2    2.32    0.32
  -6  27   2    1.30    0.51
   6  27  -2    2.21    0.46
   5 -27  -2   -0.17    0.66
   5 -27  -2    0.82    0.21
  -5 -27   2    0.85    0.23
  -5 -27   2    1.08    0.20
  -5  27   2    1.01    0.40
   5  27  -2    0.86    0.32
   4 -27  -2    1.68    0.80
   4 -27  -2    2.66    0.31
  -4 -27   2    2.08    0.30
  -4 -27   2    2.48    0.29
   4  27  -2    2.67    0.40
  -4  27   2    3.61    0.56
   3 -27  -2    1.21    0.21
  -3 -27   2    1.16    0.23
  -3 -27   2    1.63    0.22
   3  27  -2    1.01    0.31
  -3  27   2    0.97    0.36
   2 -27  -2    0.33    0.49
  -2 -27   2    0.40    0.18
   2 -27  -2    0.68    0.16
  -2 -27   2    0.72    0.16
  -2  27   2    0.60    0.29
   2  27  -2    0.96    0.30
  -1 -27   2    0.35    0.15
   1 -27  -2    0.35    0.15
  -1 -27   2    0.28    0.15
   1  27  -2    0.72    0.28
  -1  27   2    0.48    0.27
  -1  27   2    0.19    0.12
   0 -27   2    0.75    0.16
   0 -27   2    0.57    0.15
   0 -27  -2    0.31    0.15
   0  27   2    0.46    0.15
   0  27   2    0.58    0.24
   0  27  -2    0.43    0.24
   1 -27   2    1.69    0.21
   1 -27   2    2.12    0.24
  -1 -27  -2    1.60    0.23
   1  27   2    1.89    0.34
   1  27   2    1.77    0.25
  -1  27  -2    2.03    0.37
  -2 -27  -2    0.09    0.13
   2 -27   2   -0.08    0.12
   2  27   2    0.33    0.24
  -2  27  -2   -0.19    0.24
   2  27   2    0.42    0.16
  -3 -27  -2    0.28    0.15
   3 -27   2    0.20    0.16
   3  27   2    0.27    0.17
  -3  27  -2    0.19    0.26
   3  27   2    0.16    0.24
   4 -27   2    0.71    0.21
  -4 -27  -2    0.85    0.19
  -4  27  -2    0.95    0.35
   4  27   2    0.82    0.22
   4  27   2    0.76    0.29
  -4  27  -2    0.95    0.50
   5 -27   2    0.64    0.23
  -5 -27  -2    0.30    0.17
  -5  27  -2    0.52    0.49
   5  27   2    0.13    0.18
   5  27   2    0.01    0.25
  -5  27  -2    0.27    0.33
   6 -27   2    0.48    0.27
  -6 -27  -2    0.02    0.19
   6  27   2    0.06    0.19
  -6  27  -2    0.36    0.41
   7 -27   2    1.32    0.34
  -7 -27  -2    0.91    0.27
  -7  27  -2    1.93    0.55
   7  27   2    0.67    0.24
  -7 -28   2    0.34    0.24
   7 -28  -2    2.77    1.13
   7 -28  -2    0.60    0.23
  -7  28   2    0.24    0.42
   7  28  -2    0.10    0.35
   6 -28  -2    0.83    0.23
  -6 -28   2    0.66    0.20
   6 -28  -2    0.57    0.86
  -6 -28   2    0.87    0.26
  -6  28   2    0.46    0.43
   6  28  -2    0.52    0.35
   5 -28  -2    0.14    0.16
   5 -28  -2    1.76    0.85
  -5 -28   2    0.02    0.14
  -5 -28   2   -0.15    0.15
  -5  28   2   -0.66    0.30
   5  28  -2   -0.29    0.28
   4 -28  -2    3.17    0.86
   4 -28  -2    2.25    0.30
  -4 -28   2    1.87    0.30
  -4 -28   2    2.76    0.30
   4  28  -2    2.53    0.42
  -4  28   2    2.60    0.50
   3 -28  -2    4.18    0.38
  -3 -28   2    4.26    0.42
  -3 -28   2    3.72    0.37
  -3  28   2    4.41    0.58
   3  28  -2    3.99    0.51
   2 -28  -2    9.17    0.66
   2 -28  -2    6.75    1.14
  -2 -28   2    7.87    0.64
  -2 -28   2    8.95    0.64
  -2  28   2   10.21    0.82
   2  28  -2   10.08    0.78
  -1 -28   2    0.29    0.14
   1 -28  -2    0.27    0.15
  -1 -28   2    0.58    0.17
  -1  28   2    0.14    0.23
  -1  28   2    0.38    0.13
   1  28  -2    0.47    0.27
   0 -28   2    0.27    0.14
   0 -28   2    0.22    0.13
   0 -28  -2    0.52    0.17
   0  28   2    0.26    0.23
   0  28  -2    0.49    0.27
   0  28   2    0.31    0.15
  -1 -28  -2    0.77    0.18
   1 -28   2    1.10    0.19
   1 -28   2    1.17    0.18
   1  28   2    0.86    0.20
   1  28   2    0.93    0.30
  -1  28  -2    0.76    0.29
  -2 -28  -2   10.32    0.69
   2 -28   2    9.49    0.69
  -2  28  -2    9.33    0.82
   2  28   2    8.19    0.68
   2  28   2    9.54    0.77
  -3 -28  -2    1.55    0.23
   3 -28   2    0.88    0.21
   3  28   2    1.23    0.24
  -3  28  -2    1.13    0.35
   3  28   2    1.74    0.34
  -4 -28  -2    1.27    0.22
   4 -28   2    0.87    0.23
   4  28   2    0.94    0.24
   4  28   2    1.05    0.30
  -4  28  -2    0.88    0.38
   5 -28   2    0.53    0.22
  -5 -28  -2    0.45    0.19
  -5  28  -2   -0.15    0.30
   5  28   2    0.39    0.21
   6 -28   2    0.18    0.22
  -6 -28  -2    0.02    0.19
   6  28   2   -0.05    0.18
  -6  28  -2    0.22    0.41
  -7 -28  -2   -0.36    0.18
   7 -28   2    0.36    0.27
  -7  28  -2   -0.42    0.38
   7  28   2    0.34    0.22
  -7 -29   2    0.34    0.25
   7 -29  -2    0.50    0.23
   7 -29  -2    2.62    1.09
  -7  29   2    0.21    0.42
   6 -29  -2    0.35    0.20
  -6 -29   2    0.01    0.21
  -6 -29   2   -0.01    0.17
   6 -29  -2    0.83    0.83
  -6  29   2   -0.04    0.38
   6  29  -2    0.05    0.32
   5 -29  -2    0.07    0.16
   5 -29  -2    1.06    0.82
  -5 -29   2    0.30    0.17
  -5 -29   2    0.06    0.19
  -5  29   2    0.36    0.36
   5  29  -2    0.47    0.32
   4 -29  -2    0.76    0.19
  -4 -29   2    0.93    0.19
   4 -29  -2    0.60    0.67
  -4 -29   2    0.45    0.20
   4  29  -2    1.03    0.33
  -4  29   2    0.98    0.38
   3 -29  -2    1.39    0.22
  -3 -29   2    0.58    0.21
  -3 -29   2    0.64    0.17
   3  29  -2    1.10    0.33
  -3  29   2    0.51    0.31
  -2 -29   2    4.00    0.36
  -2 -29   2    3.34    0.36
   2 -29  -2    3.85    0.37
   2  29  -2    3.13    0.47
  -2  29   2    3.21    0.50
   1 -29  -2    1.58    0.24
  -1 -29   2    1.78    0.24
  -1 -29   2    1.62    0.24
  -1  29   2    2.04    0.23
  -1  29   2    2.64    0.40
   1  29  -2    1.77    0.37
   0 -29   2    0.45    0.15
   0 -29  -2    0.03    0.14
   0 -29   2    0.20    0.13
   0  29   2    0.28    0.23
   0  29   2    0.10    0.14
   0  29  -2   -0.03    0.24
  -1 -29  -2    1.01    0.19
   1 -29   2    1.26    0.20
   1 -29   2    1.12    0.19
  -1  29  -2    1.44    0.34
   1  29   2    0.96    0.21
   1  29   2    1.53    0.32
  -2 -29  -2    0.28    0.16
   2 -29   2    0.11    0.14
  -2  29  -2    0.22    0.13
  -2  29  -2    0.73    0.31
   2  29   2    0.78    0.28
   2  29   2    0.39    0.17
  -3 -29  -2    4.23    0.39
   3 -29   2    3.67    0.40
  -3  29  -2    4.31    0.57
   3  29   2    3.91    0.41
   3  29   2    4.37    0.52
  -4 -29  -2   -0.01    0.15
   4 -29   2    0.01    0.17
   4  29   2    0.09    0.17
   4  29   2    0.14    0.26
  -4  29  -2    0.18    0.31
  -5 -29  -2    0.33    0.19
   5 -29   2    0.25    0.21
   5  29   2    0.42    0.22
  -5  29  -2    0.19    0.36
   6 -29   2    0.11    0.24
   6 -29   2    0.90    0.92
  -6 -29  -2    0.14    0.19
   6  29   2    0.50    0.22
  -6  29  -2   -0.33    0.35
   7 -29   2    1.97    1.09
   7 -29   2    0.51    0.28
  -7 -29  -2    0.38    0.24
  -7  29  -2   -0.02    0.40
   7  29   2    0.19    0.21
  -7 -30   2   -0.06    0.22
   7 -30  -2    0.41    0.22
   7 -30  -2    3.48    1.02
  -7  30   2   -0.12    0.43
   6 -30  -2   -0.25    0.78
  -6 -30   2    0.22    0.19
   6 -30  -2    0.21    0.19
  -6 -30   2    0.16    0.23
  -6  30   2    0.34    0.38
   6  30  -2    0.28    0.35
   5 -30  -2    1.45    0.27
  -5 -30   2    1.79    0.27
  -5 -30   2    1.74    0.29
   5 -30  -2    2.47    0.87
   5  30  -2    1.75    0.40
  -5  30   2    1.97    0.50
  -4 -30   2    0.98    0.19
   4 -30  -2    0.73    0.19
   4 -30  -2    0.26    0.61
  -4 -30   2    0.30    0.20
   4  30  -2    0.07    0.29
  -4  30   2    0.72    0.38
   3 -30  -2    0.06    0.14
  -3 -30   2   -0.05    0.12
  -3 -30   2    0.02    0.17
  -3  30   2    0.34    0.32
   3  30  -2    0.25    0.29
  -2 -30   2    1.64    0.24
   2 -30  -2    2.00    0.26
  -2 -30   2    1.94    0.28
  -2  30   2    1.95    0.40
   2  30  -2    1.87    0.38
  -1 -30   2   13.21    0.79
   1 -30  -2    9.35    0.80
  -1 -30   2   10.58    0.80
  -1  30   2   13.08    0.77
   1  30  -2   12.88    0.97
  -1  30   2   10.61    0.95
   0 -30   2    0.03    0.13
   0 -30  -2    0.24    0.15
   0 -30   2    0.03    0.13
   0  30   2    0.20    0.14
   0  30   2    0.48    0.27
   0  30  -2    0.53    0.31
   1 -30   2    8.29    0.59
   1 -30   2    6.69    0.55
  -1 -30  -2    7.98    0.59
   1  30   2    8.39    0.60
  -1  30  -2    7.06    0.71
   1  30   2    8.28    0.72
  -2 -30  -2    3.80    0.38
   2 -30   2    3.55    0.36
   2  30   2    4.81    0.52
  -2  30  -2    3.86    0.34
  -2  30  -2    4.25    0.54
   2  30   2    3.28    0.38
  -3 -30  -2    0.37    0.17
   3 -30   2    0.90    0.20
   3  30   2    0.50    0.29
  -3  30  -2    0.94    0.34
   3  30   2    0.55    0.20
   4 -30   2    0.04    0.17
  -4 -30  -2    0.33    0.17
   4  30   2    0.11    0.27
   4  30   2    0.10    0.18
  -4  30  -2    0.51    0.33
   5 -30   2    2.62    0.38
  -5 -30  -2    3.41    0.38
   5 -30   2    2.54    0.91
   5  30   2    2.41    0.36
  -5  30  -2    1.98    0.52
   6 -30   2    0.98    0.29
   6 -30   2    1.90    0.92
  -6 -30  -2    0.52    0.24
   6  30   2    0.84    0.24
  -6  30  -2    0.74    0.45
  -7 -30  -2   -0.17    0.20
   7 -30   2    2.84    1.10
   7 -30   2    0.40    0.26
   7  30   2   -0.01    0.19
  -7  30  -2    0.04    0.46
   7 -31  -2    2.17    0.92
   7 -31  -2    0.22    0.21
  -7 -31   2    0.33    0.23
  -7  31   2   -0.30    0.44
  -6 -31   2    1.16    0.30
  -6 -31   2    1.41    0.28
   6 -31  -2    1.05    0.25
   6 -31  -2    3.38    1.02
   6  31  -2    1.01    0.39
  -6  31   2    0.57    0.42
  -5 -31   2    0.24    0.21
   5 -31  -2    1.28    0.81
   5 -31  -2    0.60    0.20
  -5 -31   2    0.09    0.17
   5  31  -2    1.05    0.37
  -5  31   2    0.54    0.41
  -4 -31   2    0.84    0.25
   4 -31  -2    1.45    0.24
  -4 -31   2    1.56    0.24
   4  31  -2    0.70    0.34
  -4  31   2    1.18    0.40
  -3 -31   2    1.84    0.29
  -3 -31   2    2.79    0.30
   3 -31  -2    2.14    0.29
  -3  31   2    1.87    0.46
   3  31  -2    2.30    0.43
   2 -31  -2    1.53    0.24
  -2 -31   2    1.66    0.26
  -2 -31   2    1.62    0.24
   2  31  -2    2.06    0.38
  -2  31   2    1.25    0.37
  -1 -31   2    0.45    0.17
  -1 -31   2    0.05    0.15
   1 -31  -2    0.65    0.18
   1  31  -2    0.73    0.29
  -1  31   2    0.53    0.15
  -1  31   2    0.56    0.29
   0 -31  -2   15.82    1.16
   0 -31   2   16.52    1.16
   0 -31   2   18.24    1.11
   0  31   2   17.74    1.29
   0  31   2   19.11    1.13
   0  31  -2   17.63    1.31
  -1 -31  -2   10.63    0.76
   1 -31   2   10.93    0.71
   1 -31   2   10.92    0.75
   1  31   2   10.20    0.74
   1  31   2    9.85    0.85
  -1  31  -2    9.71    0.89
  -2 -31  -2    3.08    0.34
   2 -31   2    2.75    0.33
  -2  31  -2    3.57    0.51
   2  31   2    3.90    0.47
   2  31   2    3.09    0.37
  -3 -31  -2    0.22    0.16
   3 -31   2    0.48    0.18
   3  31   2   -0.04    0.25
  -3  31  -2    0.66    0.34
   3  31   2    0.20    0.18
  -4 -31  -2    1.84    0.28
   4 -31   2    1.53    0.27
   4  31   2    1.60    0.29
  -4  31  -2    1.71    0.45
   4  31   2    1.97    0.39
  -5 -31  -2    0.83    0.23
   5 -31   2    0.92    0.25
  -5  31  -2    0.75    0.45
   5  31   2    0.71    0.25
  -6 -31  -2    2.04    0.32
   6 -31   2    0.70    0.91
   6 -31   2    1.50    0.33
  -6  31  -2    0.97    0.47
   6  31   2    1.59    0.31
  -7 -31  -2    0.19    0.23
   7 -31   2    1.05    1.05
   7 -31   2    0.17    0.26
   7  31   2    0.40    0.23
  -7  31  -2    0.13    0.46
   7 -32  -2    0.42    0.21
   6 -32  -2    0.55    0.88
  -6 -32   2    0.17    0.23
  -6 -32   2    0.85    0.24
   6 -32  -2    0.78    0.23
   6  32  -2    1.03    0.42
  -6  32   2    0.57    0.45
   5 -32  -2    0.31    0.19
  -5 -32   2    0.04    0.17
  -5 -32   2    0.31    0.21
  -5  32   2    0.14    0.37
   5  32  -2   -0.27    0.32
  -4 -32   2    0.12    0.19
  -4 -32   2    0.10    0.16
   4 -32  -2    0.29    0.16
   4  32  -2    0.10    0.30
  -4  32   2   -0.28    0.29
  -3 -32   2    1.78    0.25
  -3 -32   2    1.43    0.27
   3 -32  -2    1.33    0.23
  -3  32   2    1.86    0.46
   3  32  -2    1.63    0.39
  -2 -32   2    1.80    0.29
  -2 -32   2    2.43    0.29
   2 -32  -2    2.24    0.29
   2  32  -2    2.05    0.42
  -2  32   2    2.04    0.45
  -1 -32   2    0.06    0.15
  -1 -32   2    0.02    0.16
   1 -32  -2    0.00    0.15
   1  32  -2    0.10    0.26
  -1  32   2    0.06    0.26
  -1  32   2    0.35    0.15
   0 -32  -2    5.90    0.52
   0 -32   2    6.43    0.50
   0 -32   2    5.52    0.51
   0  32  -2    6.89    0.69
   0  32   2    8.12    0.54
   0  32   2    6.74    0.65
   1 -32   2    1.12    0.19
   1 -32   2    1.27    0.22
  -1 -32  -2    1.42    0.23
   1  32   2    1.86    0.37
   1  32   2    0.94    0.21
  -1  32  -2    1.34    0.36
   2 -32   2    0.08    0.14
  -2 -32  -2    0.19    0.15
  -2  32  -2    0.43    0.32
   2  32   2    0.25    0.28
   2  32   2    0.01    0.16
  -3 -32  -2    1.39    0.25
   3 -32   2    1.05    0.23
   3  32   2    1.26    0.34
  -3  32  -2    1.35    0.39
   3  32   2    0.87    0.24
  -4 -32  -2    0.92    0.22
   4 -32   2    0.83    0.23
   4  32   2    0.89    0.26
   4  32   2    0.75    0.33
  -4  32  -2    0.93    0.39
  -5 -32  -2    0.21    0.20
   5 -32   2    0.41    0.21
   5  32   2    0.26    0.20
  -5  32  -2    0.02    0.39
  -6 -32  -2    0.56    0.24
   6 -32   2    0.20    0.23
   6  32   2    0.14    0.21
  -6  32  -2    0.35    0.44
   6 -33  -2    0.27    0.21
  -6 -33   2   -0.16    0.22
  -6 -33   2    0.18    0.21
  -6  33   2    0.19    0.37
   6  33  -2   -0.07    0.34
  -5 -33   2    0.15    0.16
   5 -33  -2   -0.10    0.15
  -5 -33   2   -0.11    0.20
   5  33  -2   -0.35    0.31
  -5  33   2   -0.15    0.39
  -4 -33   2    0.52    0.22
  -4 -33   2    0.71    0.20
   4 -33  -2    0.37    0.18
   4  33  -2    0.61    0.35
  -4  33   2    0.59    0.36
  -3 -33   2    1.56    0.28
  -3 -33   2    1.86    0.26
   3 -33  -2    1.77    0.26
  -3  33   2    1.17    0.42
   3  33  -2    1.45    0.38
   2 -33  -2    2.01    0.28
  -2 -33   2    1.87    0.29
  -2 -33   2    2.12    0.28
   2  33  -2    1.87    0.42
  -2  33   2    2.34    0.47
   1 -33  -2    0.31    0.17
  -1 -33   2    0.50    0.18
  -1 -33   2    0.36    0.18
  -1  33   2    0.14    0.30
  -1  33   2    0.33    0.15
   1  33  -2    0.81    0.32
   0 -33  -2    2.69    0.34
   0 -33   2    3.19    0.33
   0 -33   2    3.63    0.35
   0  33   2    3.21    0.33
   0  33  -2    2.16    0.44
   0  33   2    2.78    0.46
   1 -33   2    0.80    0.20
  -1 -33  -2    0.94    0.21
  -1  33  -2    1.19    0.36
   1  33   2    1.13    0.35
   1  33   2    1.07    0.22
   2 -33   2    3.54    0.38
  -2 -33  -2    4.03    0.39
   2  33   2    4.72    0.54
   2  33   2    3.60    0.40
  -2  33  -2    3.11    0.53
  -3 -33  -2    0.52    0.19
   3 -33   2    0.25    0.17
  -3  33  -2    0.05    0.31
   3  33   2    0.34    0.19
   3  33   2    0.73    0.30
   4 -33   2    0.00    0.17
  -4 -33  -2   -0.23    0.14
   4  33   2   -0.25    0.17
  -4  33  -2    0.49    0.35
   4  33   2   -0.01    0.29
   5 -33   2   -0.05    0.19
  -5 -33  -2   -0.11    0.17
   5  33   2   -0.21    0.17
  -5  33  -2    0.21    0.37
  -6 -33  -2   -0.09    0.19
   6 -33   2    0.47    0.23
  -6  33  -2   -0.26    0.37
   6  33   2    0.10    0.21
   6 -34  -2    0.03    0.18
  -6 -34   2    0.34    0.24
  -6 -34   2   -0.17    0.19
   6  34  -2   -0.45    0.33
  -6  34   2    0.42    0.46
  -5 -34   2    0.10    0.18
   5 -34  -2    0.17    0.18
  -5 -34   2    0.38    0.24
  -5  34   2    0.55    0.45
   5  34  -2    0.07    0.34
   4 -34  -2    0.38    0.18
  -4 -34   2    0.32    0.24
  -4 -34   2    0.36    0.18
  -4  34   2    0.73    0.42
   4  34  -2    0.78    0.37
   3 -34  -2    0.43    0.18
  -3 -34   2    0.25    0.16
  -3 -34   2    0.51    0.21
   3  34  -2    0.34    0.34
  -3  34   2    0.12    0.35
  -2 -34   2    0.02    0.14
   2 -34  -2   -0.08    0.14
  -2 -34   2    0.36    0.20
  -2  34   2    0.00    0.31
   2  34  -2    0.01    0.28
  -1 -34   2    1.71    0.26
   1 -34  -2    1.66    0.26
  -1 -34   2    1.38    0.25
   1  34  -2    1.40    0.37
  -1  34   2    1.14    0.36
  -1  34   2    1.51    0.23
   0 -34  -2    1.38    0.24
   0 -34   2    1.50    0.24
   0 -34   2    1.53    0.24
   0  34   2    1.33    0.23
   0  34   2    1.54    0.38
   0  34  -2    1.27    0.39
  -1 -34  -2    0.44    0.17
   1 -34   2    0.00    0.14
  -1  34  -2    0.09    0.30
   1  34   2    0.20    0.17
   1  34   2   -0.14    0.28
   2 -34   2    2.04    0.28
  -2 -34  -2    1.79    0.28
   2  34   2    2.15    0.41
  -2  34  -2    1.85    0.43
   2  34   2    2.25    0.31
   3 -34   2    0.26    0.18
  -3 -34  -2    0.46    0.18
  -3  34  -2    0.18    0.36
   3  34   2    0.53    0.30
   3  34   2    0.08    0.18
   4 -34   2    0.93    0.24
  -4 -34  -2    0.79    0.23
  -4  34  -2    0.90    0.41
   4  34   2    0.91    0.26
   5 -34   2    0.15    0.19
  -5 -34  -2    0.17    0.20
   5  34   2    0.01    0.19
  -5  34  -2    0.20    0.40
   6 -34   2    0.13    0.21
  -6 -34  -2    0.02    0.20
   6  34   2   -0.13    0.20
  -6  34  -2    0.27    0.45
   6 -35  -2    0.03    0.19
  -6 -35   2   -0.05    0.21
  -6 -35   2   -0.03    0.23
   6  35  -2   -0.18    0.36
  -6  35   2    0.23    0.43
  -5 -35   2   -0.14    0.22
   5 -35  -2    0.05    0.17
  -5 -35   2    0.10    0.19
   5  35  -2    0.24    0.37
  -5  35   2   -0.37    0.36
  -4 -35   2    0.25    0.24
   4 -35  -2    0.64    0.20
  -4 -35   2    0.83    0.21
  -4  35   2    0.69    0.42
   4  35  -2    0.29    0.36
   3 -35  -2   -0.20    0.14
  -3 -35   2   -0.13    0.15
  -3 -35   2   -0.08    0.19
  -3  35   2    0.09    0.35
   3  35  -2    0.13    0.30
  -2 -35   2    0.34    0.20
   2 -35  -2    0.20    0.17
  -2 -35   2   -0.11    0.14
   2  35  -2   -0.14    0.30
  -2  35   2    0.78    0.36
  -1 -35   2    0.57    0.20
  -1 -35   2    0.64    0.19
   1 -35  -2    0.70    0.20
   1  35  -2    0.94    0.37
  -1  35   2    0.68    0.19
  -1  35   2    0.38    0.32
   0 -35   2    0.57    0.19
   0 -35   2    0.45    0.19
   0 -35  -2    0.41    0.19
   0  35  -2    0.55    0.33
   0  35   2    0.20    0.31
   0  35   2    0.56    0.19
   1 -35   2    0.31    0.17
  -1 -35  -2    0.64    0.19
  -1  35  -2    0.55    0.33
   1  35   2    0.69    0.34
   1  35   2    0.90    0.21
  -1  35  -2    0.34    0.17
   2 -35   2    0.12    0.16
  -2 -35  -2    0.19    0.17
   2  35   2    0.06    0.29
   2  35   2    0.20    0.18
  -2  35  -2    0.28    0.34
   3 -35   2    0.03    0.17
  -3 -35  -2   -0.16    0.15
  -3  35  -2   -0.18    0.30
   3  35   2    0.06    0.29
   3  35   2    0.22    0.19
   4 -35   2    0.72    0.22
  -4 -35  -2    0.89    0.24
   4  35   2    0.83    0.25
  -4  35  -2    1.05    0.42
   5 -35   2   -0.08    0.18
  -5 -35  -2   -0.40    0.17
  -5  35  -2   -0.40    0.34
   5  35   2   -0.06    0.19
   6 -35   2   -0.27    0.19
  -6 -35  -2   -0.12    0.19
  -6  35  -2    0.21    0.45
   6  35   2    0.41    0.24
   6 -36  -2    0.01    0.19
  -6 -36   2   -0.22    0.18
  -6  36   2    0.01    0.41
  -5 -36   2    1.45    0.30
  -5 -36   2    0.68    0.24
   5 -36  -2    1.38    0.26
  -5  36   2    0.50    0.43
   5  36  -2    0.72    0.41
  -4 -36   2   -0.03    0.21
  -4 -36   2   -0.03    0.16
   4 -36  -2   -0.09    0.16
  -4  36   2   -0.05    0.39
   4  36  -2   -0.49    0.31
   3 -36  -2    0.91    0.22
  -3 -36   2    0.22    0.24
  -3 -36   2    1.35    0.24
   3  36  -2    0.82    0.39
  -3  36   2    1.09    0.41
  -2 -36   2   -0.57    0.16
  -2 -36   2   -0.17    0.14
   2 -36  -2    0.03    0.16
   2  36  -2    0.30    0.33
  -2  36   2   -0.13    0.28
  -1 -36   2    0.88    0.23
   1 -36  -2    0.96    0.22
  -1 -36   2    0.47    0.19
   1  36  -2    0.74    0.37
  -1  36   2    0.83    0.19
  -1  36   2    0.34    0.33
   0 -36   2    0.48    0.19
   0 -36  -2    0.48    0.20
   0 -36   2    0.13    0.17
   0  36   2    0.23    0.17
   0  36  -2    0.16    0.33
   0  36   2   -0.07    0.30
   1 -36   2    1.68    0.26
  -1 -36  -2    1.51    0.26
  -1  36  -2    1.56    0.25
  -1  36  -2    1.34    0.43
   1  36   2    1.65    0.27
   1  36   2    1.85    0.41
  -2 -36  -2    1.02    0.23
   2 -36   2    0.99    0.22
   2  36   2    1.02    0.24
   2  36   2    0.97    0.35
  -2  36  -2    0.47    0.34
   3 -36   2    0.04    0.16
  -3 -36  -2    0.14    0.18
   3  36   2   -0.02    0.18
   3  36   2   -0.23    0.28
  -3  36  -2    0.19    0.37
   4 -36   2    0.16    0.19
  -4 -36  -2    0.19    0.20
  -4  36  -2    0.74    0.41
   4  36   2    0.09    0.20
  -5 -36  -2    0.33    0.21
   5 -36   2    0.30    0.22
  -5  36  -2    0.81    0.46
   5  36   2   -0.03    0.20
   6 -36   2    0.12    0.21
  -6 -36  -2   -0.05    0.21
  -6  36  -2    0.49    0.49
   6  36   2    0.00    0.21
  -5 -37   2    0.06    0.23
   5 -37  -2    0.17    0.18
  -5 -37   2    0.15    0.19
  -5  37   2   -0.08    0.39
   5  37  -2   -0.05    0.37
   4 -37  -2    0.19    0.18
  -4 -37   2    0.18    0.19
  -4 -37   2    0.13    0.24
   4  37  -2    0.48    0.35
  -4  37   2    0.04    0.41
  -3 -37   2    2.11    0.34
   3 -37  -2    2.40    0.31
  -3 -37   2    1.89    0.30
   3  37  -2    2.22    0.46
  -3  37   2    1.93    0.50
  -2 -37   2    0.03    0.16
  -2 -37   2   -0.12    0.20
   2 -37  -2    0.26    0.18
   2  37  -2   -0.02    0.32
  -2  37   2    0.25    0.37
  -1 -37   2    1.09    0.23
   1 -37  -2    0.98    0.23
  -1 -37   2    1.43    0.25
  -1  37   2    0.68    0.37
   1  37  -2    1.00    0.38
  -1  37   2    1.13    0.22
   0 -37  -2    2.00    0.31
   0 -37   2    2.51    0.33
   0  37   2    3.16    0.33
   0  37   2    2.47    0.47
   0  37  -2    2.79    0.48
  -1 -37  -2    0.43    0.19
   1 -37   2    0.37    0.18
   1  37   2    0.16    0.18
  -1  37  -2    0.49    0.36
   1  37   2    0.59    0.33
  -1  37  -2    0.27    0.18
   2 -37   2   -0.02    0.16
  -2 -37  -2    0.09    0.18
  -2  37  -2   -0.27    0.29
   2  37   2    0.49    0.33
   2  37   2   -0.09    0.17
  -3 -37  -2    0.04    0.19
   3 -37   2    0.07    0.17
  -3  37  -2   -0.45    0.30
   3  37   2   -0.17    0.17
   3  37   2    0.04    0.31
  -4 -37  -2    0.00    0.19
   4 -37   2    0.07    0.19
  -4  37  -2    0.40    0.42
   4  37   2   -0.25    0.18
   5 -37   2    0.56    0.22
  -5 -37  -2    0.54    0.23
  -5  37  -2    0.50    0.43
   5  37   2    0.16    0.22
  -5 -38   2   -0.13    0.21
  -5 -38   2    0.12    0.20
   5 -38  -2    0.38    0.19
  -5  38   2   -0.05    0.44
   5  38  -2   -0.06    0.36
   4 -38  -2    0.05    0.18
  -4 -38   2    0.12    0.19
  -4 -38   2   -0.16    0.20
  -4  38   2   -0.04    0.41
   4  38  -2   -0.25    0.35
   3 -38  -2    0.16    0.18
  -3 -38   2    0.28    0.18
  -3 -38   2    0.08    0.21
  -3  38   2   -0.25    0.35
   3  38  -2    0.69    0.37
  -2 -38   2    0.92    0.25
  -2 -38   2    0.46    0.20
   2 -38  -2    0.58    0.21
  -2  38   2    0.44    0.37
   2  38  -2    0.89    0.36
   1 -38  -2    0.06    0.18
  -1 -38   2    0.19    0.17
  -1 -38   2    0.30    0.19
  -1  38   2    0.18    0.16
   1  38  -2   -0.22    0.32
  -1  38   2   -0.22    0.31
   0 -38   2    0.56    0.21
   0 -38  -2    0.81    0.22
   0  38   2    0.41    0.19
   0  38   2    0.46    0.32
   0  38  -2    1.04    0.39
  -1 -38  -2    0.22    0.18
   1 -38   2    0.55    0.19
   1  38   2    0.19    0.19
   1  38   2    0.68    0.34
  -1  38  -2    0.50    0.37
   2 -38   2   -0.19    0.15
  -2 -38  -2   -0.16    0.16
   2  38   2   -0.65    0.27
  -2  38  -2   -0.26    0.32
   2  38   2    0.31    0.20
   3 -38   2    0.26    0.19
  -3 -38  -2   -0.14    0.18
  -3  38  -2    0.06    0.37
   3  38   2   -0.21    0.18
   3  38   2   -0.17    0.32
  -4 -38  -2    0.18    0.20
   4 -38   2   -0.09    0.17
   4  38   2    0.08    0.20
  -4  38  -2   -0.02    0.36
  -5 -38  -2    0.11    0.20
   5 -38   2   -0.01    0.19
  -5  38  -2    0.34    0.43
   5  38   2    0.25    0.24
   5 -39  -2    0.20    0.20
  -5 -39   2    0.35    0.21
  -5  39   2    0.15    0.44
   5  39  -2    0.32    0.39
   4 -39  -2    0.16    0.19
  -4 -39   2   -0.02    0.22
  -4 -39   2    0.21    0.20
   4  39  -2    0.58    0.38
  -4  39   2    0.13    0.38
  -3 -39   2    0.29    0.20
   3 -39  -2    0.65    0.22
  -3 -39   2    0.58    0.25
  -3  39   2    0.60    0.44
   3  39  -2    0.68    0.36
  -2 -39   2    0.20    0.21
   2 -39  -2    0.41    0.20
  -2 -39   2    0.56    0.20
  -2  39   2    0.38    0.39
   2  39  -2    0.97    0.37
  -1 -39   2   -0.07    0.16
   1 -39  -2   -0.04    0.18
   1  39  -2    0.36    0.35
  -1  39   2    0.17    0.35
   0 -39  -2    0.16    0.17
   0 -39   2    0.27    0.19
   0  39  -2   -0.24    0.16
   0  39   2    0.25    0.33
   0  39   2    0.11    0.16
   0  39  -2    0.01    0.34
  -1 -39  -2    1.71    0.29
   1 -39   2    2.21    0.30
  -1  39  -2    1.02    0.43
   1  39   2    2.49    0.32
   1  39   2    2.39    0.47
   2 -39   2    0.63    0.21
  -2 -39  -2    0.52    0.21
   2  39   2    0.35    0.33
   2  39   2    0.20    0.21
  -2  39  -2    0.59    0.37
  -3 -39  -2    4.27    0.46
   3 -39   2    3.51    0.41
  -3  39  -2    3.42    0.63
   3  39   2    3.67    0.56
   3  39   2    3.72    0.44
  -4 -39  -2   -0.19    0.19
   4 -39   2    0.12    0.19
  -4  39  -2   -0.21    0.34
   4  39   2   -0.32    0.19
  -5 -39  -2    0.11    0.21
   5 -39   2    0.43    0.22
   5  39   2   -0.06    0.21
  -5  39  -2   -0.64    0.31
  -4 -40   2    0.23    0.20
   4 -40  -2    0.08    0.18
  -4  40   2   -0.17    0.38
   4  40  -2    0.15    0.37
  -3 -40   2   -0.05    0.21
   3 -40  -2   -0.15    0.17
  -3 -40   2   -0.26    0.16
  -3  40   2   -0.10    0.35
   3  40  -2    0.06    0.35
   2 -40  -2    0.08    0.19
  -2 -40   2    0.09    0.17
  -2  40   2    0.36    0.36
   2  40  -2   -0.10    0.34
   1 -40  -2    0.70    0.23
  -1 -40   2    0.72    0.22
   1  40  -2    1.17    0.39
  -1  40   2    0.82    0.40
   0 -40  -2    0.67    0.21
   0 -40   2    0.65    0.22
   0  40  -2    0.22    0.19
   0  40  -2    0.60    0.35
   0  40   2    0.54    0.36
   0  40   2    0.53    0.20
  -1 -40  -2   -0.02    0.18
   1 -40   2   -0.09    0.16
   1  40   2    0.18    0.31
  -1  40  -2   -0.50    0.28
   1  40   2    0.06    0.18
  -2 -40  -2    0.63    0.22
   2 -40   2    0.29    0.19
   2  40   2    0.45    0.35
   2  40   2   -0.07    0.18
  -2  40  -2    0.07    0.37
  -3 -40  -2   -0.22    0.18
   3 -40   2   -0.16    0.17
   3  40   2    0.01    0.20
  -3  40  -2    0.40    0.41
   3  40   2   -0.43    0.31
   4 -40   2    0.86    0.26
  -4 -40  -2    1.00    0.27
  -4  40  -2    2.36    0.59
   4  40   2    0.75    0.27
   4 -41  -2   -0.06    0.19
  -4 -41   2    0.20    0.21
   4  41  -2    0.02    0.38
  -4  41   2    0.05    0.45
  -3 -41   2    0.40    0.21
   3 -41  -2    0.28    0.21
   3  41  -2   -0.17    0.34
  -3  41   2    0.11    0.41
  -2 -41   2    0.44    0.21
   2 -41  -2    0.35    0.20
   2  41  -2    0.26    0.37
  -2  41   2    0.13    0.36
  -1 -41   2    0.04    0.19
   1 -41  -2    0.15    0.20
   1  41  -2    0.62    0.36
  -1  41   2    0.51    0.39
   1  41  -2    0.26    0.21
   0 -41  -2   -0.01    0.17
   0 -41   2   -0.04    0.17
   0  41  -2   -0.01    0.18
   0  41   2    0.02    0.17
   0  41   2   -0.09    0.32
   0  41  -2    0.12    0.35
  -1 -41  -2    0.46    0.21
   1 -41   2    0.29    0.18
   1  41   2    0.20    0.33
   1  41   2   -0.14    0.17
  -1  41  -2    0.02    0.35
  -2 -41  -2    0.84    0.24
   2 -41   2    1.38    0.25
   2  41   2    0.24    0.36
  -2  41  -2    0.39    0.38
   2  41   2    0.66    0.25
  -3 -41  -2   -0.03    0.19
   3 -41   2   -0.12    0.17
   3  41   2    0.10    0.23
  -3  41  -2   -0.23    0.38
   4 -41   2    0.25    0.20
  -4 -41  -2   -0.03    0.20
   4  41   2   -0.03    0.21
  -4  41  -2    0.44    0.44
   4 -42  -2    0.65    0.24
  -4 -42   2    0.86    0.25
   4  42  -2    1.13    0.46
   4  42  -2    0.35    0.26
  -4  42   2    0.44    0.47
  -3 -42   2    0.23    0.20
   3 -42  -2   -0.05    0.18
   3  42  -2   -0.50    0.30
  -3  42   2    0.26    0.41
   2 -42  -2    0.37    0.20
  -2 -42   2    0.27    0.20
   2  42  -2   -0.16    0.36
  -2  42   2    0.14    0.42
   2  42  -2    0.11    0.21
   1 -42  -2    0.36    0.22
  -1 -42   2    0.56    0.22
  -1  42   2    0.19    0.37
   1  42  -2    1.20    0.43
   1  42  -2    0.55    0.22
   0 -42  -2    0.36    0.22
   0 -42   2    0.60    0.23
   0  42  -2    0.52    0.21
   0  42  -2    1.01    0.41
   0  42   2    0.77    0.38
   0  42   2    0.55    0.22
   1 -42   2    0.51    0.20
  -1 -42  -2   -0.25    0.17
   1  42   2   -0.15    0.33
  -1  42  -2    0.29    0.41
   1  42   2    0.03    0.20
   2 -42   2   -0.05    0.17
  -2 -42  -2   -0.20    0.18
   2  42   2   -0.37    0.33
  -2  42  -2    0.09    0.39
   2  42   2   -0.17    0.19
  -3 -42  -2    0.20    0.22
   3 -42   2    0.46    0.21
   3  42   2   -0.12    0.22
  -3  42  -2    0.51    0.41
  -4 -42  -2   -0.12    0.21
   4 -42   2    0.00    0.19
   4  42   2    0.22    0.23
  -4  42  -2    0.19    0.46
   3 -43  -2    0.69    0.25
  -3 -43   2    1.16    0.27
   3  43  -2    0.88    0.28
   3  43  -2    0.73    0.43
  -3  43   2    0.92    0.49
  -2 -43   2   -0.17    0.18
   2 -43  -2    0.12    0.20
   2  43  -2    0.27    0.22
  -2  43   2    0.30    0.41
   2  43  -2   -0.01    0.37
  -1 -43   2    0.02    0.18
   1 -43  -2   -0.20    0.18
   1  43  -2   -0.25    0.36
  -1  43   2   -0.21    0.36
   1  43  -2    0.34    0.21
   0 -43  -2   -0.28    0.17
   0 -43   2    0.13    0.19
   0  43   2    0.29    0.20
   0  43   2   -0.39    0.34
   0  43  -2    0.29    0.38
   0  43  -2    0.00    0.18
   1 -43   2    0.07    0.19
  -1 -43  -2    0.33    0.20
   1  43   2    0.36    0.37
   1  43   2    0.35    0.21
  -1  43  -2    0.17    0.36
   2 -43   2   -0.06    0.18
  -2 -43  -2   -0.28    0.18
   2  43   2   -0.10    0.34
  -2  43  -2   -0.09    0.38
   2  43   2   -0.26    0.19
   3 -43   2   -0.05    0.18
  -3 -43  -2   -0.08    0.19
  -3  43  -2   -0.49    0.35
   3  43   2    0.48    0.24
  -3 -44   2    0.00    0.20
   3 -44  -2   -0.20    0.19
   3  44  -2   -0.06    0.41
   3  44  -2    0.17    0.24
  -2 -44   2   -0.07    0.20
   2 -44  -2   -0.02    0.20
   2  44  -2    0.31    0.39
  -2  44   2    0.37    0.40
   2  44  -2   -0.26    0.18
  -1 -44   2    0.21    0.20
   1 -44  -2    0.09    0.22
   1  44  -2    0.47    0.40
  -1  44   2    0.34    0.40
   1  44  -2    0.26    0.22
   0 -44   2   -0.21    0.18
   0 -44  -2    0.29    0.21
   0  44   2    0.30    0.40
   0  44   2    0.05    0.21
   0  44  -2    0.04    0.35
  -1 -44  -2    0.25    0.21
   1 -44   2   -0.28    0.16
   1  44   2   -0.21    0.18
   1  44   2   -0.38    0.34
  -1  44  -2    0.12    0.36
   2 -44   2   -0.05    0.20
  -2 -44  -2   -0.20    0.19
   2  44   2    0.13    0.20
   2  44   2   -0.13    0.36
  -2  44  -2    0.20    0.38
  -3 -44  -2    0.29    0.24
   3 -44   2    0.26    0.22
   3  44   2    0.45    0.25
   2 -45  -2    0.81    0.27
  -2 -45   2    1.23    0.28
   2  45  -2    0.35    0.42
   2  45  -2    1.12    0.28
  -2  45   2    0.45    0.41
  -1 -45   2   -0.25    0.18
   1 -45  -2   -0.39    0.18
   1  45  -2    0.28    0.22
   1  45  -2   -0.19    0.35
  -1  45   2   -0.42    0.37
   0 -45  -2    0.21    0.20
   0 -45   2    0.31    0.21
   0  45   2   -0.38    0.36
   0  45  -2   -0.12    0.37
   1 -45   2    0.53    0.22
  -1 -45  -2    0.19    0.23
   1  45   2    0.32    0.41
  -1  45  -2    0.84    0.46
   1  45   2    0.97    0.26
  -2 -45  -2    0.68    0.26
   2 -45   2    0.35    0.23
  -2  45  -2    1.20    0.47
   2  45   2    0.68    0.42
   2  45   2    0.55    0.24
  -1 -46   2    0.98    0.26
   1 -46  -2    0.66    0.25
   1  46  -2    0.49    0.43
   1  46  -2    0.90    0.26
   0 -46  -2    0.45    0.21
   0 -46   2    0.31    0.21
   0  46  -2    0.24    0.39
   0  46   2   -0.23    0.37
  -1 -46  -2    0.27    0.23
   1 -46   2    0.21    0.23
   1  46   2    0.43    0.23
   1  46   2    0.05    0.38
   9   0  -3    1.64    1.10
  -9   0   3   -0.34    0.40
  -8   0   3    0.71    0.43
   8   0  -3   -0.64    0.89
   7   0  -3   -0.05    0.26
   7   0  -3    0.79    0.94
  -7   0   3   -0.46    0.32
   6   0  -3    1.45    0.90
  -6   0   3    0.35    0.32
  -5   0   3    1.49    0.37
   4   0  -3    0.45    0.17
  -4   0   3    2.09    0.34
   3   0  -3    0.87    0.60
   3   0  -3   -0.22    0.09
  -3   0   3   -0.13    0.19
  -2   0   3    0.01    0.05
   2   0  -3   -0.01    0.35
  -2   0   3   -0.05    0.13
   2   0  -3    0.04    0.06
   1   0  -3   -0.11    0.36
  -1   0   3   -0.02    0.15
  -1   0   3    0.03    0.06
   0   0   3    0.03    0.06
   0   0  -3    0.09    0.11
   0   0  -3    0.00    0.03
   0   0   3   -0.02    0.03
  -1   0  -3    0.15    0.17
  -1   0  -3   -0.02    0.07
   1   0   3    0.09    0.05
  -1   0  -3   -0.05    0.07
   2   0   3    0.02    0.05
  -2   0  -3    0.02    0.19
   3   0   3   -0.23    0.14
   3   0   3    0.16    0.06
  -4   0  -3    3.18    0.61
  -5   0  -3    0.78    0.27
  -5   0  -3    1.19    0.45
   5   0   3   -0.22    0.21
   6   0   3    0.52    0.27
  -6   0  -3    1.16    0.58
  -6   0  -3   -0.23    0.28
  -7   0  -3    0.44    0.55
  -7   0  -3    0.30    0.33
   7   0   3    0.34    0.31
  -8   0  -3   -0.22    0.35
  -8   0  -3    0.20    0.59
   8   0   3    0.07    0.33
  -9   0  -3    0.18    0.65
   9   0   3    1.05    0.46
   9  -1  -3    0.71    1.11
  -9  -1   3    0.15    0.44
  -9   1   3    0.14    0.44
   9   1  -3    0.51    1.15
   8  -1  -3   -0.48    0.82
  -8  -1   3    0.14    0.36
  -8   1   3    0.74    0.47
   8   1  -3    1.21    1.02
  -7  -1   3   -0.29    0.33
   7  -1  -3    0.51    0.97
   7  -1  -3    0.66    0.30
  -7   1   3    0.06    0.35
   7   1  -3    0.58    0.92
   7   1  -3   -0.14    0.26
   6  -1  -3    0.31    0.27
  -6  -1   3    0.80    0.34
  -6  -1   3    0.55    0.15
   6  -1  -3    1.13    0.90
   6   1  -3    0.90    0.28
  -6   1   3    0.70    0.15
   6   1  -3    1.17    0.87
  -6   1   3    0.38    0.32
  -5  -1   3   19.12    1.42
   5  -1  -3   19.16    1.31
  -5   1   3   19.95    1.44
  -5   1   3   19.46    1.17
   5   1  -3   18.84    1.31
  -4  -1   3   11.06    0.80
  -4  -1   3   15.93    1.03
   4  -1  -3   13.87    0.92
  -4   1   3   12.23    1.00
   4   1  -3   13.88    0.92
  -4   1   3   13.15    0.80
   3  -1  -3    1.07    0.63
  -3  -1   3    0.83    0.24
   3  -1  -3    0.51    0.14
   3   1  -3    0.74    0.15
  -3   1   3    0.79    0.25
   3   1  -3    1.50    0.63
  -2  -1   3    0.04    0.06
   2  -1  -3    0.17    0.07
  -2  -1   3    0.04    0.14
   2  -1  -3    0.06    0.38
   2   1  -3    0.23    0.38
   2   1  -3    0.03    0.06
  -2   1   3   -0.03    0.15
   1  -1  -3  199.17   14.94
   1  -1  -3  214.63   11.58
  -1  -1   3  190.13   11.14
  -1  -1   3  185.02   11.97
  -1   1   3  178.44   11.97
  -1   1   3  195.79   11.14
   1   1  -3  189.88   14.91
   0  -1   3  279.31   15.96
   0  -1  -3  290.18   21.18
   0  -1  -3  260.27   16.58
   0   1   3  281.15   17.07
   0   1   3  264.33   15.94
   0   1  -3  285.38   21.17
  -1  -1  -3   19.05    1.56
  -1  -1  -3   19.05    1.21
   1  -1   3   19.20    1.14
  -1  -1  -3   19.54    1.19
  -1   1  -3   20.61    1.58
   1   1   3   19.11    1.14
  -2  -1  -3   21.67    1.80
   2  -1   3   22.10    1.41
  -2  -1  -3   22.81    1.36
  -2  -1  -3   20.67    1.40
   2  -1   3   21.45    1.28
   2   1   3   22.23    1.29
  -2   1  -3   22.21    1.81
   3  -1   3   38.31    2.21
   3  -1   3   37.12    2.40
  -3  -1  -3   39.17    3.10
  -3   1  -3   36.24    3.10
   3   1   3   38.76    2.22
   4  -1   3   39.66    2.31
   4  -1   3   40.20    2.54
  -4  -1  -3   38.15    3.28
  -4   1  -3   38.11    3.28
  -4   1  -3   40.75    2.59
   4   1   3   38.39    2.53
   4   1   3   40.82    2.32
  -5  -1  -3    8.09    0.98
   5  -1   3    6.63    0.67
   5  -1   3    7.22    0.46
  -5   1  -3    6.66    0.92
   5   1   3    6.03    0.67
  -5   1  -3    6.55    0.68
  -6  -1  -3   -0.01    0.30
  -6  -1  -3    1.54    0.58
   6  -1   3    0.76    0.31
  -6   1  -3   -0.19    0.30
   6   1   3    1.04    0.32
  -6   1  -3    1.41    0.55
  -7  -1  -3    1.20    0.65
  -7  -1  -3    1.06    0.39
   7  -1   3    0.93    0.37
   7   1   3    1.18    0.37
  -7   1  -3    1.42    0.65
  -7   1  -3    1.13    0.39
   8  -1   3    0.04    0.35
  -8  -1  -3    0.02    0.59
  -8   1  -3    0.57    0.41
  -8   1  -3    0.60    0.65
   8   1   3   -0.24    0.32
  -9  -1  -3    2.06    0.85
   9  -1   3    0.54    0.44
   9   1   3    0.90    0.46
  -9   1  -3    1.48    0.78
  -9  -2   3    0.52    0.46
   9  -2  -3    0.22    0.97
  -9   2   3   -0.14    0.44
   9   2  -3   -0.27    1.01
   8  -2  -3    1.02    1.07
  -8  -2   3   -0.11    0.38
   8   2  -3    0.91    0.99
  -8   2   3   -0.47    0.37
  -7  -2   3    2.61    0.52
   7  -2  -3    2.74    0.44
   7  -2  -3    1.20    1.01
   7   2  -3    2.10    1.03
   7   2  -3    2.52    0.42
  -7   2   3    2.74    0.56
   6  -2  -3    1.54    0.92
  -6  -2   3    0.95    0.38
   6  -2  -3    1.29    0.31
   6   2  -3    1.26    0.33
  -6   2   3    1.01    0.39
   6   2  -3   -0.13    0.77
  -5  -2   3    0.17    0.25
   5  -2  -3    0.36    0.21
   5   2  -3    0.48    0.22
   4  -2  -3   15.55    1.84
   4  -2  -3   16.87    1.13
  -4  -2   3   16.87    1.24
  -4  -2   3   15.09    1.03
   4   2  -3   16.83    1.83
   4   2  -3   16.41    1.13
  -4   2   3   19.60    1.27
  -4   2   3   17.82    1.02
   3  -2  -3   72.35    4.26
  -3  -2   3   66.90    4.43
  -3  -2   3   69.75    4.06
   3  -2  -3   66.45    5.72
  -3   2   3   70.28    4.45
   3   2  -3   72.03    4.25
   2  -2  -3   -0.04    0.07
  -2  -2   3   -0.05    0.05
  -2  -2   3   -0.17    0.13
   2  -2  -3    0.73    0.43
  -2  -2   3   -0.03    0.04
   2   2  -3    0.05    0.35
  -2   2   3    0.04    0.15
   1  -2  -3    5.17    0.70
  -1  -2   3    4.28    0.31
  -1  -2   3    3.96    0.40
   1  -2  -3    4.38    0.28
  -1   2   3    4.38    0.42
  -1   2   3    4.32    0.30
   1   2  -3    4.78    0.63
   0  -2   3   92.44    5.15
   0  -2  -3   89.27    5.36
   0  -2  -3   82.14    6.88
   0   2   3   86.29    5.15
   0   2  -3   92.78    6.87
   0   2   3   92.91    5.53
   1  -2   3  180.57   10.52
  -1  -2  -3  187.01   14.02
  -1  -2  -3  178.53   10.97
   1   2   3  177.13   10.53
  -1   2  -3  191.01   14.03
  -2  -2  -3    8.89    0.55
  -2  -2  -3    7.79    0.57
   2  -2   3    8.38    0.62
  -2  -2  -3    8.50    0.78
   2  -2   3    8.51    0.50
   2   2   3    8.31    0.52
  -2   2  -3    7.61    0.79
  -3  -2  -3   21.61    1.89
   3  -2   3   21.49    1.47
   3  -2   3   22.44    1.30
  -3  -2  -3   22.57    1.40
  -3   2  -3   22.18    1.91
   3   2   3   22.45    1.32
  -4   2  -3    2.74    0.57
   5  -2   3   22.57    1.49
  -5  -2  -3   21.44    1.47
   5  -2   3   21.14    1.24
  -5  -2  -3   19.21    1.92
  -5   2  -3   20.95    1.98
   5   2   3   18.91    1.46
   5   2   3   20.55    1.26
  -5   2  -3   22.57    1.51
  -6  -2  -3    0.16    0.43
  -6  -2  -3   -0.05    0.26
   6  -2   3   -0.23    0.24
   6   2   3    0.07    0.09
  -6   2  -3   -0.37    0.46
  -6   2  -3   -0.39    0.27
   6   2   3   -0.08    0.26
  -7  -2  -3    5.47    0.97
   7  -2   3    4.39    0.61
  -7  -2  -3    4.58    0.61
  -7   2  -3    4.11    0.63
   7   2   3    4.97    0.64
  -7   2  -3    4.12    0.95
   8  -2   3    0.15    0.36
  -8  -2  -3    0.17    0.54
   8   2   3    0.11    0.33
  -8   2  -3   -0.20    0.55
  -8   2  -3    0.14    0.39
   9  -2   3    0.16    0.39
  -9  -2  -3   -0.37    0.62
   9   2   3    0.47    0.45
  -9   2  -3    0.47    0.64
   9  -3  -3   -1.13    0.94
  -9  -3   3    0.15    0.44
   9   3  -3    0.18    1.02
  -9   3   3    0.47    0.48
   8  -3  -3    1.05    0.99
  -8  -3   3   -0.12    0.38
  -8   3   3    0.43    0.43
   8   3  -3   -0.14    0.89
   7  -3  -3    1.08    0.31
  -7  -3   3    0.53    0.37
   7  -3  -3   -0.60    0.78
   7   3  -3    0.54    0.27
   7   3  -3   -1.40    0.74
  -7   3   3   -0.22    0.32
  -6  -3   3    1.21    0.39
   6  -3  -3   -0.52    0.88
   6   3  -3    1.48    0.94
  -6   3   3    0.63    0.36
  -5  -3   3    0.03    0.12
   5  -3  -3    0.27    0.19
  -5  -3   3    0.28    0.27
   5   3  -3    0.24    0.19
  -5   3   3    0.10    0.26
  -5   3   3    0.30    0.10
   4  -3  -3    0.91    0.68
  -4  -3   3    1.35    0.16
  -4  -3   3    2.22    0.35
   4  -3  -3    1.00    0.22
   4   3  -3    1.13    0.22
   4   3  -3    1.35    0.67
   3  -3  -3    0.32    0.14
  -3  -3   3    0.36    0.09
   3  -3  -3    0.81    0.58
  -3  -3   3    0.13    0.21
   3   3  -3    0.60    0.58
   2  -3  -3   11.96    1.25
  -2  -3   3   11.85    0.72
  -2  -3   3   12.66    0.84
  -2  -3   3   10.91    0.71
   2  -3  -3   11.77    0.75
  -2   3   3   11.87    0.85
   2   3  -3   11.35    1.17
  -1  -3   3    0.27    0.08
  -1  -3   3    0.38    0.04
   1  -3  -3    0.39    0.06
  -1  -3   3    0.50    0.16
   1  -3  -3    0.34    0.41
  -1   3   3    0.23    0.06
   1   3  -3   -0.06    0.32
  -1   3   3    0.31    0.17
   0  -3   3   27.15    1.50
   0  -3  -3   24.24    2.03
   0  -3  -3   24.11    1.55
   0   3   3   25.17    1.49
   0   3  -3   25.42    1.62
   0   3   3   27.59    1.61
   0   3  -3   25.48    2.01
  -1  -3  -3    1.57    0.18
   1  -3   3    2.22    0.24
  -1  -3  -3    2.43    0.31
   1  -3   3    1.89    0.17
   1   3   3    1.97    0.17
  -1   3  -3    2.14    0.30
  -2  -3  -3    0.63    0.12
  -2  -3  -3    0.86    0.25
   2  -3   3    0.60    0.15
  -2  -3  -3    0.63    0.10
   2  -3   3    0.65    0.07
  -2   3  -3    0.83    0.26
   2   3   3    0.50    0.08
  -3  -3  -3   20.23    1.30
  -3  -3  -3   20.22    1.77
   3  -3   3   20.68    1.38
   3  -3   3   21.71    1.21
  -3   3  -3   19.80    1.79
  -3   3  -3   21.25    1.39
   3   3   3   20.08    1.23
  -4  -3  -3    0.51    0.14
   4  -3   3    0.27    0.20
   4  -3   3    0.12    0.06
  -4  -3  -3    0.14    0.33
  -4   3  -3   -0.29    0.20
  -4   3  -3   -0.19    0.31
   4   3   3    0.67    0.10
   5  -3   3    0.30    0.24
  -5  -3  -3    0.41    0.39
   5   3   3    0.76    0.12
  -5   3  -3    1.26    0.32
  -5   3  -3    1.43    0.48
   5   3   3    0.07    0.25
   6  -3   3   -0.40    0.23
  -6  -3  -3   -0.15    0.26
  -6  -3  -3    0.10    0.46
   6   3   3    0.16    0.10
   6   3   3   -0.50    0.23
  -6   3  -3   -0.50    0.28
  -6   3  -3    0.33    0.48
  -7  -3  -3    0.61    0.55
   7  -3   3    0.84    0.36
  -7  -3  -3    0.25    0.30
   7   3   3    0.95    0.35
  -7   3  -3   -0.14    0.48
  -7   3  -3    0.33    0.36
   8  -3   3   -0.13    0.35
  -8  -3  -3    0.23    0.59
  -8   3  -3    0.06    0.58
  -8   3  -3   -0.19    0.38
   8   3   3   -0.31    0.31
   9  -3   3    0.20    0.40
  -9  -3  -3   -0.13    0.64
   9   3   3    0.59    0.43
  -9   3  -3   -0.70    0.59
   9  -4  -3   -0.43    1.03
  -9  -4   3    1.01    0.49
  -9   4   3    0.15    0.45
   9   4  -3   -0.16    0.97
   8  -4  -3    0.34    0.99
  -8  -4   3    1.66    0.47
   8   4  -3    0.75    1.12
  -8   4   3    0.83    0.50
  -7  -4   3    0.58    0.38
   7  -4  -3    0.24    1.00
   7  -4  -3   -0.20    0.25
  -7   4   3    0.68    0.42
   7   4  -3    0.84    0.30
   7   4  -3    0.99    1.01
   6  -4  -3    0.26    0.25
  -6  -4   3    0.27    0.30
   6  -4  -3    0.64    0.85
   6   4  -3    0.25    0.26
   6   4  -3   -0.53    0.70
  -6   4   3    0.21    0.36
  -5  -4   3    0.30    0.13
  -5  -4   3    0.31    0.25
   5  -4  -3    0.34    0.20
  -5   4   3   -0.03    0.27
   5   4  -3    0.15    0.19
  -5   4   3    0.56    0.11
  -4  -4   3    7.06    0.61
   4  -4  -3    6.04    0.52
  -4  -4   3    5.95    0.44
   4  -4  -3    6.08    1.20
  -4   4   3    5.98    0.41
   4   4  -3    5.78    1.12
  -4   4   3    6.35    0.62
   4   4  -3    5.86    0.51
   3  -4  -3    5.05    0.43
   3  -4  -3    6.11    1.01
  -3  -4   3    5.36    0.50
  -3  -4   3    5.26    0.38
  -3   4   3    5.56    0.53
   3   4  -3    4.13    0.85
  -3   4   3    5.47    0.35
   2  -4  -3    5.07    0.82
   2  -4  -3    4.96    0.36
  -2  -4   3    4.47    0.34
  -2  -4   3    5.81    0.44
  -2  -4   3    5.04    0.33
  -2   4   3    5.15    0.47
   2   4  -3    5.40    0.76
  -1  -4   3    5.53    0.35
   1  -4  -3    5.98    0.36
  -1  -4   3    5.21    0.38
   1  -4  -3    4.78    0.76
  -1  -4   3    5.52    0.45
  -1   4   3    5.58    0.48
  -1   4   3    6.15    0.36
   1   4  -3    4.86    0.67
   0  -4  -3   18.23    1.15
   0  -4  -3   19.46    1.54
   0  -4   3   20.39    1.11
   0   4   3   17.91    1.20
   0   4  -3   18.76    1.49
   0   4   3   18.82    1.11
   0   4  -3   18.71    1.21
  -1  -4  -3   63.71    5.14
  -1  -4  -3   63.57    4.01
   1  -4   3   72.79    3.84
   1   4   3   71.05    3.85
   1   4   3   66.59    4.11
  -1   4  -3   62.58    4.13
  -1   4  -3   64.94    5.15
  -2  -4  -3    3.26    0.26
  -2  -4  -3    2.98    0.26
   2  -4   3    3.12    0.21
   2  -4   3    3.13    0.32
  -2  -4  -3    3.10    0.40
  -2   4  -3    3.27    0.30
  -2   4  -3    3.30    0.45
   2   4   3    3.23    0.24
  -3  -4  -3    3.59    0.35
   3  -4   3    4.16    0.28
   3  -4   3    4.18    0.44
  -3   4  -3    5.70    0.45
  -3   4  -3    5.46    0.69
   4  -4   3    5.06    0.35
   4  -4   3    4.79    0.53
  -4  -4  -3    6.19    0.82
  -4  -4  -3    5.90    0.45
   4   4   3    6.22    0.38
  -4   4  -3    5.24    0.80
  -4   4  -3    4.20    0.52
  -5  -4  -3    6.08    0.89
   5  -4   3    5.43    0.58
   5  -4   3    5.08    0.34
  -5   4  -3    5.46    0.59
   5   4   3    5.21    0.38
  -5   4  -3    4.95    0.84
   5   4   3    5.08    0.59
   6  -4   3    1.32    0.36
  -6  -4  -3    1.09    0.57
  -6  -4  -3    1.47    0.35
  -6   4  -3    0.98    0.38
   6   4   3    1.39    0.36
  -6   4  -3    0.57    0.52
   6   4   3    1.21    0.17
   7  -4   3    0.15    0.30
  -7  -4  -3    0.12    0.30
  -7  -4  -3   -0.05    0.48
   7   4   3    0.39    0.33
  -7   4  -3   -0.25    0.33
  -7   4  -3   -0.55    0.49
  -8  -4  -3    0.06    0.56
   8  -4   3   -0.46    0.31
   8   4   3    0.37    0.35
  -8   4  -3   -0.77    0.58
  -8   4  -3   -0.12    0.37
   9  -4   3    0.32    0.39
  -9  -4  -3    0.40    0.71
  -9   4  -3    0.16    0.70
   9   4   3   -0.40    0.37
   9  -5  -3    0.75    1.20
  -9  -5   3    0.21    0.42
  -9   5   3   -0.19    0.45
   9   5  -3    1.80    1.21
  -8  -5   3    0.27    0.37
   8  -5  -3   -0.39    0.99
   8   5  -3   -0.44    0.87
  -8   5   3    0.24    0.44
   7  -5  -3    1.30    0.97
  -7  -5   3    0.76    0.39
   7  -5  -3    0.51    0.28
   7   5  -3    0.36    0.27
  -7   5   3    0.32    0.41
   7   5  -3    0.76    0.88
  -6  -5   3    3.30    0.33
  -6  -5   3    2.02    0.46
   6   5  -3    2.97    0.42
   6   5  -3    2.26    0.97
  -6   5   3    2.90    0.56
  -5  -5   3    4.55    0.54
   5  -5  -3    2.89    1.04
  -5  -5   3    4.55    0.37
   5  -5  -3    4.81    0.49
   5   5  -3    3.59    1.02
   5   5  -3    4.16    0.46
  -5   5   3    4.31    0.60
  -5   5   3    4.38    0.32
   4  -5  -3    7.65    1.33
   4  -5  -3    8.77    0.68
  -4  -5   3    8.86    0.75
  -4  -5   3    7.79    0.59
  -4   5   3    9.37    0.56
  -4   5   3   10.46    0.81
  -3  -5   3   -0.08    0.08
   3  -5  -3    0.09    0.12
  -3  -5   3    0.24    0.18
   3  -5  -3    0.18    0.53
   3   5  -3   -0.77    0.38
  -3   5   3   -0.05    0.20
   2  -5  -3    0.36    0.39
  -2  -5   3    0.30    0.08
   2  -5  -3    0.37    0.09
  -2  -5   3    0.32    0.06
  -2  -5   3    0.30    0.15
   2   5  -3    0.40    0.32
  -2   5   3    0.38    0.19
  -1  -5   3   17.21    1.04
   1  -5  -3   13.23    1.47
  -1  -5   3   15.36    0.94
  -1  -5   3   16.08    0.95
   1  -5  -3   16.38    0.96
   1   5  -3   12.74    1.35
  -1   5   3   16.70    1.06
   0  -5   3  178.81    9.61
   0  -5  -3  160.58   10.00
   0  -5  -3  151.49   12.80
   0   5   3  166.08    9.60
   0   5  -3  173.91   10.31
   0   5  -3  170.65   12.77
   0   5   3  165.01   10.30
   1  -5   3   -0.04    0.11
   1  -5   3    0.03    0.05
  -1  -5  -3    0.03    0.06
   1   5   3    0.07    0.06
  -1   5  -3    0.02    0.17
   1   5   3    0.08    0.05
  -1   5  -3    0.08    0.09
  -2  -5  -3    4.78    0.51
  -2  -5  -3    3.81    0.31
   2  -5   3    4.63    0.27
  -2  -5  -3    4.23    0.32
   2  -5   3    4.61    0.41
   2   5   3    4.20    0.30
  -2   5  -3    4.04    0.36
  -2   5  -3    4.14    0.54
  -3  -5  -3   53.66    3.29
   3  -5   3   54.71    3.11
   3  -5   3   54.95    3.36
  -3  -5  -3   52.18    4.29
  -3  -5  -3   54.39    3.39
  -3   5  -3   50.58    4.31
  -3   5  -3   55.73    3.44
   3   5   3   54.27    3.14
  -4  -5  -3   12.77    0.84
  -4  -5  -3   11.92    1.22
   4  -5   3   12.52    0.73
   4  -5   3   11.46    0.93
  -4   5  -3   12.29    0.94
   4   5   3   12.60    0.77
  -4   5  -3   10.92    1.27
  -5  -5  -3    5.43    0.47
  -5  -5  -3    5.98    0.86
   5  -5   3    5.47    0.61
  -5   5  -3    6.30    0.91
   5   5   3    5.02    0.39
  -5   5  -3    5.57    0.61
   6  -5   3    1.72    0.38
  -6  -5  -3    1.98    0.64
   6   5   3    1.26    0.35
   6   5   3    1.06    0.17
  -6   5  -3    1.36    0.39
  -6   5  -3    2.03    0.69
  -7  -5  -3   -0.18    0.49
   7  -5   3    0.71    0.34
  -7  -5  -3    0.41    0.34
  -7   5  -3    0.68    0.38
   7   5   3    0.79    0.37
  -7   5  -3    1.07    0.59
  -8  -5  -3   -1.06    0.50
   8  -5   3    0.17    0.35
   8   5   3    0.46    0.37
  -8   5  -3   -0.70    0.55
  -8   5  -3    0.90    0.45
   9  -5   3    0.82    0.45
  -9  -5  -3    1.60    0.78
  -9   5  -3    1.47    0.79
   9   5   3    0.69    0.46
   9  -6  -3   -1.26    1.02
  -9  -6   3    0.58    0.43
  -9   6   3   -0.04    0.46
   9   6  -3    1.54    1.15
   8  -6  -3   -0.51    1.04
  -8  -6   3    0.03    0.33
   8   6  -3   -0.50    0.93
  -8   6   3    0.27    0.42
   7  -6  -3    0.21    0.89
   7  -6  -3    0.65    0.29
  -7  -6   3    0.52    0.36
  -7   6   3    0.91    0.45
   7   6  -3    1.30    0.35
   7   6  -3   -0.09    0.90
   6  -6  -3    2.52    1.10
   6  -6  -3    2.22    0.37
  -6  -6   3    2.20    0.26
  -6  -6   3    1.09    0.39
   6   6  -3    3.18    0.42
  -6   6   3    0.99    0.43
   6   6  -3    1.82    0.97
  -5  -6   3    0.35    0.13
  -5  -6   3    0.50    0.26
   5  -6  -3    0.09    0.73
   5  -6  -3    0.36    0.20
   5   6  -3    0.49    0.21
   5   6  -3   -0.34    0.66
  -5   6   3    0.52    0.33
  -5   6   3    0.63    0.10
  -4  -6   3    1.87    0.32
  -4  -6   3    0.80    0.16
   4  -6  -3    1.35    0.69
   4  -6  -3    0.68    0.20
  -4   6   3    1.37    0.12
   4   6  -3    1.65    0.66
   3  -6  -3   26.18    1.66
  -3  -6   3   28.14    1.77
   3  -6  -3   25.47    2.46
  -3  -6   3   25.45    1.57
  -3   6   3   25.59    1.79
  -3   6   3   27.50    1.54
   3   6  -3   24.94    2.38
   2  -6  -3   36.14    2.18
  -2  -6   3   34.07    2.09
  -2  -6   3   36.20    2.29
   2  -6  -3   35.72    3.06
  -2   6   3   36.92    2.07
  -2   6   3   34.86    2.32
   1  -6  -3    2.51    0.53
   1  -6  -3    3.02    0.21
  -1  -6   3    3.09    0.23
  -1   6   3    2.49    0.29
   1   6  -3    2.34    0.41
   1   6  -3    2.32    0.30
   0  -6   3   25.42    1.59
   0  -6  -3   24.22    1.57
   0  -6  -3   23.41    2.07
   0  -6   3   29.76    1.52
   0   6  -3   27.19    1.65
   0   6  -3   25.72    2.02
   0   6   3   24.90    1.51
   0   6   3   25.73    1.64
  -1  -6  -3    4.00    0.29
  -1  -6  -3    3.84    0.41
   1  -6   3    5.33    0.37
   1   6   3    4.36    0.28
  -1   6  -3    3.43    0.32
   1   6   3    3.98    0.28
  -1   6  -3    3.63    0.44
  -2  -6  -3   44.34    2.73
  -2  -6  -3   43.64    3.54
   2  -6   3   49.76    2.60
   2  -6   3   46.09    2.80
   2   6   3   44.08    2.62
  -2   6  -3   43.12    3.57
  -2   6  -3   42.52    2.84
   3  -6   3    8.87    0.53
  -3  -6  -3    8.86    0.89
  -3  -6  -3    9.78    0.62
  -3  -6  -3    8.28    0.63
   3  -6   3    8.66    0.71
   3   6   3    8.81    0.57
  -3   6  -3    8.71    0.93
  -4  -6  -3    7.48    0.55
   4  -6   3    6.79    0.67
  -4  -6  -3    6.17    0.84
  -4   6  -3    5.87    0.92
   4   6   3    8.19    0.51
  -4   6  -3    9.34    0.70
   5  -6   3    1.81    0.35
  -5  -6  -3    1.65    0.24
  -5   6  -3    1.72    0.36
   5   6   3    1.72    0.20
   6  -6   3    2.56    0.46
  -6  -6  -3    3.78    0.78
  -6   6  -3    3.14    0.77
  -6   6  -3    1.59    0.45
   6   6   3    3.15    0.29
   6   6   3    2.19    0.44
  -7  -6  -3    0.89    0.57
  -7  -6  -3    0.41    0.30
  -7   6  -3    0.64    0.56
   7   6   3    0.72    0.34
  -7   6  -3    0.70    0.39
   8  -6   3   -0.09    0.35
  -8  -6  -3    0.50    0.60
   8   6   3    0.20    0.36
  -8   6  -3   -0.32    0.56
  -8   6  -3   -0.28    0.38
   9  -6   3    0.73    0.41
  -9  -6  -3    0.88    0.67
  -9   6  -3    0.39    0.68
   9   6   3   -0.48    0.38
  -9  -7   3    0.12    0.39
   9  -7  -3   -0.05    1.09
  -9   7   3    0.17    0.49
   9   7  -3   -0.12    0.94
  -8  -7   3    0.13    0.36
   8  -7  -3    1.22    1.10
   8   7  -3    0.60    0.98
  -8   7   3    0.13    0.40
  -7  -7   3    0.17    0.32
   7  -7  -3   -0.09    0.89
   7  -7  -3    0.17    0.25
  -7  -7   3   -0.10    0.16
  -7   7   3   -0.37    0.36
   7   7  -3    0.50    0.89
   7   7  -3    0.32    0.26
  -6  -7   3    4.71    0.63
   6  -7  -3    3.85    1.23
  -6  -7   3    6.82    0.47
   6   7  -3    4.78    1.23
  -6   7   3    3.91    0.68
  -5  -7   3    3.37    0.33
  -5  -7   3    3.40    0.47
   5  -7  -3    4.18    0.43
   5   7  -3    0.83    0.83
  -5   7   3    2.74    0.52
  -5   7   3    3.83    0.27
  -4  -7   3    6.40    0.44
   4  -7  -3    5.64    1.13
  -4  -7   3    8.17    0.61
   4  -7  -3    5.17    0.50
  -4   7   3    5.73    0.38
   4   7  -3    5.28    1.05
  -4   7   3    4.74    0.61
  -3  -7   3    4.23    0.35
   3  -7  -3    5.15    0.40
   3  -7  -3    5.10    0.98
   3   7  -3    4.47    0.81
  -2  -7   3   42.34    2.48
   2  -7  -3   44.03    2.58
  -2  -7   3   44.03    2.70
  -2   7   3   42.35    2.74
  -2   7   3   44.02    2.46
   2   7  -3   35.92    3.43
  -1  -7   3  129.60    7.31
   1  -7  -3  129.12    7.59
   1   7  -3  117.97    7.88
  -1   7   3  128.87    7.87
   0  -7  -3   33.99    2.10
   0  -7  -3   32.19    2.74
   0  -7   3   34.29    2.11
   0   7   3   34.97    2.18
   0   7   3   35.03    2.02
   0   7  -3   36.14    2.19
   0   7  -3   35.82    2.70
  -1  -7  -3    9.91    0.65
  -1  -7  -3   10.81    0.86
   1  -7   3   10.25    0.61
  -1   7  -3   10.29    0.89
   1   7   3    9.86    0.66
  -1   7  -3   10.06    0.69
   1   7   3   10.31    0.63
  -2  -7  -3    2.59    0.24
  -2  -7  -3    3.37    0.42
   2  -7   3    2.20    0.29
   2  -7   3    2.54    0.19
  -2   7  -3    3.11    0.30
   2   7   3    3.61    0.28
  -2   7  -3    2.96    0.46
   2   7   3    2.83    0.24
  -3  -7  -3   15.45    0.99
   3  -7   3   14.22    1.05
  -3  -7  -3   13.86    1.33
  -3  -7  -3   14.78    0.96
  -3   7  -3   15.42    1.06
  -3   7  -3   14.52    1.37
   3   7   3   15.04    0.91
   4  -7   3   12.56    0.95
  -4  -7  -3   11.60    0.83
  -4  -7  -3   12.57    1.24
  -4   7  -3   12.34    0.96
   4   7   3   12.83    0.79
  -4   7  -3   13.32    1.29
  -5  -7  -3    1.86    0.53
  -5  -7  -3    1.50    0.23
   5  -7   3    1.05    0.33
  -5   7  -3    1.59    0.37
  -5   7  -3    1.15    0.53
   5   7   3    1.61    0.19
  -6  -7  -3    0.07    0.52
   6  -7   3    0.58    0.31
   6   7   3    0.67    0.14
  -6   7  -3    0.24    0.50
  -6   7  -3   -0.05    0.31
  -7  -7  -3    0.21    0.30
  -7  -7  -3    0.67    0.56
   7  -7   3   -0.01    0.29
  -7   7  -3    0.10    0.56
  -7   7  -3    0.45    0.38
   7   7   3   -0.70    0.27
  -8  -7  -3   -0.38    0.59
   8  -7   3    0.29    0.37
  -8   7  -3    0.31    0.68
  -8   7  -3   -0.14    0.41
   8   7   3    0.17    0.37
  -9  -7  -3   -0.21    0.59
   9  -7   3   -0.11    0.34
  -9   7  -3    0.82    0.69
   9   7   3    0.47    0.43
   9  -8  -3   -0.64    1.08
  -9  -8   3   -0.08    0.38
  -9   8   3   -0.31    0.44
   9   8  -3    0.29    0.96
  -8  -8   3    1.61    0.48
   8  -8  -3    1.96    1.18
   8   8  -3    1.72    1.10
  -8   8   3    1.87    0.57
   7  -8  -3    1.60    1.09
  -7  -8   3    1.74    0.43
   7  -8  -3    1.90    0.35
   7   8  -3    0.29    0.85
  -7   8   3    1.08    0.49
   7   8  -3    2.85    0.44
  -6  -8   3    1.42    0.38
   6  -8  -3    0.54    0.90
   6  -8  -3    0.53    0.26
  -6  -8   3    0.23    0.17
   6   8  -3    0.94    0.29
  -6   8   3   -0.02    0.38
   6   8  -3    1.90    0.87
  -5  -8   3    0.13    0.14
   5  -8  -3   -0.05    0.66
   5  -8  -3    0.34    0.19
  -5  -8   3    0.00    0.23
   5   8  -3   -0.17    0.61
  -5   8   3    0.61    0.33
  -4  -8   3   15.51    1.05
   4  -8  -3   16.97    1.14
  -4  -8   3   18.11    1.23
   4  -8  -3   12.48    1.79
  -4   8   3   18.28    1.01
  -4   8   3   17.96    1.29
  -3  -8   3   32.23    1.99
   3  -8  -3   27.81    2.76
  -3  -8   3   29.17    1.79
   3  -8  -3   29.60    1.88
  -3   8   3   31.03    2.04
   3   8  -3   24.50    2.59
  -3   8   3   33.12    1.76
  -2  -8   3   56.56    3.42
   2  -8  -3   58.60    3.56
   2  -8  -3   56.64    4.80
  -2  -8   3   59.34    3.70
  -2   8   3   58.12    3.74
  -2   8   3   61.79    3.39
  -1  -8   3    9.63    0.57
   1  -8  -3    6.88    0.95
   1  -8  -3    9.84    0.58
   1   8  -3    7.37    0.79
   1   8  -3    9.31    0.67
  -1   8   3    9.84    0.68
   0  -8  -3    7.27    0.49
   0  -8   3    7.07    0.50
   0   8   3    7.96    0.54
   0   8   3    7.67    0.48
   0   8  -3    7.47    0.54
   0   8  -3    8.28    0.65
  -1  -8  -3  124.15    7.46
   1  -8   3  120.59    7.15
  -1   8  -3  124.78    9.56
   1   8   3  128.03    7.68
   1   8   3  126.58    7.17
  -1   8  -3  120.53    7.70
   2  -8   3   90.68    5.36
  -2  -8  -3   87.65    5.30
  -2  -8  -3   89.28    6.81
   2  -8   3   85.82    5.06
   2   8   3   89.96    5.09
  -2   8  -3   86.68    6.84
  -2   8  -3   85.81    5.48
   2   8   3   86.25    5.45
  -3  -8  -3    4.91    0.66
  -3  -8  -3    5.34    0.40
   3  -8   3    4.56    0.50
  -3  -8  -3    5.29    0.41
  -3   8  -3    5.66    0.75
   3   8   3    5.29    0.38
  -3   8  -3    5.86    0.50
  -4  -8  -3    0.99    0.17
  -4  -8  -3    0.68    0.37
   4  -8   3    1.11    0.28
   4   8   3    0.84    0.14
  -4   8  -3    0.84    0.41
  -4   8  -3    1.13    0.27
  -5  -8  -3    3.28    0.36
  -5  -8  -3    3.58    0.70
   5  -8   3    4.13    0.51
  -5   8  -3    3.51    0.72
   5   8   3    3.76    0.32
  -5   8  -3    4.01    0.51
   6  -8   3    0.93    0.35
  -6  -8  -3    1.24    0.61
  -6  -8  -3    1.17    0.23
   6   8   3    1.12    0.18
  -6   8  -3    0.76    0.38
  -6   8  -3    1.26    0.63
   7  -8   3    3.56    0.58
  -7  -8  -3    4.33    0.92
  -7   8  -3    3.38    0.61
   7   8   3    4.76    0.66
   7   8   3    4.52    0.38
  -7   8  -3    4.31    0.94
  -8  -8  -3    0.35    0.62
   8  -8   3    0.25    0.35
   8   8   3   -0.77    0.31
  -8   8  -3   -0.11    0.63
  -8   8  -3    0.43    0.41
   9  -8   3    0.07    0.35
  -9  -8  -3    0.15    0.70
   9   8   3    0.29    0.42
  -9   8  -3   -1.04    0.60
   9  -9  -3    0.10    1.01
  -9  -9   3    0.26    0.40
  -9   9   3   -0.32    0.44
   9   9  -3    2.47    1.21
   8  -9  -3    0.81    1.09
  -8  -9   3    0.36    0.38
  -8   9   3    0.08    0.45
   8   9  -3    0.63    0.97
   7  -9  -3    0.36    0.26
  -7  -9   3    0.41    0.33
   7  -9  -3    0.96    0.90
   7   9  -3   -0.05    0.85
  -7   9   3   -0.40    0.36
   7   9  -3    0.42    0.29
   6  -9  -3    1.53    0.96
  -6  -9   3    0.41    0.29
  -6   9   3    0.52    0.36
   6   9  -3   -1.48    0.63
  -5  -9   3    1.53    0.21
   5  -9  -3    2.10    0.96
  -5  -9   3    1.17    0.30
  -5   9   3    1.61    0.42
   5   9  -3   -0.58    0.62
  -4  -9   3   -0.12    0.10
   4  -9  -3    0.25    0.14
   4  -9  -3    0.28    0.60
  -4  -9   3    0.12    0.19
  -4   9   3    0.07    0.05
   4   9  -3    0.30    0.55
  -3  -9   3    0.95    0.21
   3  -9  -3    0.83    0.16
  -3  -9   3    0.65    0.13
   3  -9  -3    1.27    0.63
   3   9  -3    1.31    0.52
  -2  -9   3    0.87    0.12
   2  -9  -3    0.94    0.13
   2  -9  -3    0.50    0.46
   2   9  -3    0.79    0.23
   2   9  -3    0.94    0.37
   1  -9  -3   48.39    2.91
  -1  -9   3   47.87    2.80
  -1   9   3   48.78    3.05
   1   9  -3   47.07    3.05
   0  -9  -3    0.08    0.05
   0  -9   3    0.05    0.06
   0  -9   3   -0.02    0.06
   0   9   3    0.05    0.05
   0   9  -3    0.06    0.10
   0   9  -3    0.02    0.11
   0   9   3   -0.09    0.08
   1  -9   3   41.22    2.49
  -1  -9  -3   42.36    2.60
  -1   9  -3   43.42    2.71
   1   9   3   42.41    2.50
  -1   9  -3   42.36    3.36
   1   9   3   45.31    2.68
  -2  -9  -3    3.85    0.29
   2  -9   3    3.42    0.37
   2  -9   3    3.37    0.24
  -2  -9  -3    3.84    0.45
  -2   9  -3    3.97    0.36
  -2   9  -3    3.76    0.52
   2   9   3    3.55    0.29
   2   9   3    3.48    0.28
   3  -9   3    7.30    0.59
  -3  -9  -3    6.32    0.73
  -3  -9  -3    6.93    0.48
   3   9   3    6.19    0.45
  -3   9  -3    6.64    0.57
   3   9   3    5.95    0.52
  -3   9  -3    6.29    0.80
  -4  -9  -3    0.12    0.28
   4  -9   3    0.40    0.22
  -4  -9  -3    0.29    0.12
  -4   9  -3    0.40    0.24
   4   9   3    0.45    0.12
  -4   9  -3    0.39    0.40
   5  -9   3    2.95    0.44
  -5  -9  -3    3.98    0.68
  -5  -9  -3    2.97    0.33
   5   9   3    2.88    0.30
  -5   9  -3    3.24    0.48
  -5   9  -3    2.98    0.68
   6  -9   3    1.39    0.38
  -6  -9  -3    1.49    0.59
  -6  -9  -3    1.65    0.26
  -6   9  -3    1.82    0.45
  -6   9  -3    1.04    0.59
   6   9   3    1.50    0.22
   7  -9   3    0.76    0.35
  -7  -9  -3    0.64    0.54
   7   9   3    0.26    0.36
  -7   9  -3   -0.45    0.47
   7   9   3    0.72    0.17
  -7   9  -3    0.34    0.37
   8  -9   3    0.31    0.35
  -8  -9  -3   -0.14    0.59
   8   9   3    0.56    0.39
  -8   9  -3   -0.68    0.55
  -8   9  -3   -0.23    0.38
  -9  -9  -3    1.27    0.66
   9  -9   3    0.15    0.36
   9   9   3    0.61    0.44
  -9   9  -3   -0.10    0.65
  -9 -10   3   -0.61    0.35
   9 -10  -3    1.69    1.28
  -9  10   3    0.51    0.47
   9  10  -3    1.62    1.00
  -8 -10   3    1.16    0.44
   8 -10  -3    3.09    1.22
  -8  10   3    1.36    0.53
   8  10  -3    1.38    1.02
   7 -10  -3    0.96    0.96
  -7 -10   3    0.16    0.31
  -7 -10   3    0.95    0.21
   7 -10  -3    0.65    0.26
   7  10  -3    0.02    0.89
  -7  10   3   -0.13    0.35
   7  10  -3    1.13    0.34
  -6 -10   3    0.98    0.36
   6 -10  -3    1.47    0.30
  -6 -10   3    2.05    0.25
  -6 -10   3    1.48    0.22
   6 -10  -3    1.54    0.98
  -6  10   3    1.20    0.42
   6  10  -3    0.72    0.72
  -5 -10   3    2.40    0.27
   5 -10  -3    2.93    0.35
  -5 -10   3    2.83    0.28
  -5 -10   3    2.91    0.41
   5 -10  -3    2.12    1.02
   5  10  -3    2.51    0.89
  -5  10   3    2.77    0.50
   4 -10  -3    1.00    0.69
  -4 -10   3    1.87    0.30
   4 -10  -3    1.34    0.24
  -4  10   3    1.77    0.15
  -4  10   3    1.47    0.35
   4  10  -3    1.24    0.63
   3 -10  -3    0.61    0.55
  -3 -10   3    0.75    0.21
   3 -10  -3    0.46    0.13
  -3 -10   3    0.44    0.12
  -3  10   3    0.71    0.25
   3  10  -3    0.64    0.44
  -3  10   3    0.67    0.08
  -2 -10   3    0.04    0.08
   2 -10  -3    0.18    0.08
   2 -10  -3   -0.40    0.34
   2  10  -3    0.38    0.32
  -2  10   3    0.16    0.05
   2  10  -3    0.39    0.20
  -2  10   3    0.24    0.18
  -1 -10   3    0.05    0.05
   1 -10  -3    0.04    0.05
  -1 -10   3    0.04    0.06
   1 -10  -3   -0.21    0.30
   1  10  -3   -0.03    0.12
   1  10  -3    0.21    0.13
  -1  10   3   -0.04    0.12
   0 -10  -3    2.46    0.19
   0 -10   3    2.19    0.20
   0  10  -3    2.17    0.24
   0  10  -3    2.18    0.25
   0  10   3    2.14    0.19
   0  10   3    2.23    0.23
   1 -10   3    9.78    0.58
  -1 -10  -3    9.25    0.62
   1  10   3    9.56    0.64
  -1  10  -3    9.59    0.68
   1  10   3    9.23    0.60
  -1  10  -3    9.84    0.85
   2 -10   3   21.17    1.28
  -2 -10  -3   22.77    1.37
   2 -10   3   21.57    1.43
   2  10   3   21.49    1.32
  -2  10  -3   20.75    1.44
  -2  10  -3   22.51    1.86
   2  10   3   23.72    1.41
  -3 -10  -3    0.38    0.27
   3 -10   3    0.52    0.21
   3  10   3    0.57    0.12
  -3  10  -3    0.28    0.19
  -3  10  -3    0.62    0.35
  -4 -10  -3   -0.06    0.10
   4 -10   3    0.28    0.20
  -4 -10  -3    0.47    0.32
   4  10   3    0.27    0.10
  -4  10  -3   -0.04    0.35
  -4  10  -3   -0.24    0.17
  -5 -10  -3   -0.29    0.12
  -5 -10  -3    0.91    0.40
   5 -10   3    0.34    0.26
   5  10   3    0.04    0.11
  -5  10  -3    1.37    0.50
  -5  10  -3   -0.05    0.27
  -6 -10  -3    6.79    0.56
  -6 -10  -3    7.96    1.10
   6 -10   3    6.56    0.71
   6  10   3    6.80    0.52
  -6  10  -3    7.03    1.13
  -6  10  -3    6.20    0.76
  -7 -10  -3   -0.10    0.51
   7 -10   3    0.17    0.31
  -7  10  -3    0.52    0.56
   7  10   3    0.38    0.15
  -7  10  -3    0.16    0.35
   7  10   3    0.27    0.35
  -8 -10  -3    1.99    0.82
   8 -10   3    2.48    0.51
   8  10   3    3.16    0.59
  -8  10  -3    2.62    0.60
  -8  10  -3    3.50    1.01
  -9 -10  -3    0.66    0.65
   9 -10   3   -0.11    0.37
   9  10   3   -0.30    0.38
  -9  10  -3   -0.01    0.67
  -9 -11   3    0.32    0.41
   9 -11  -3    1.02    1.16
   9  11  -3    0.61    0.96
  -9  11   3   -0.24    0.47
   8 -11  -3   -1.17    0.82
  -8 -11   3    0.25    0.34
   8  11  -3    0.25    0.89
  -8  11   3    0.25    0.45
   7 -11  -3    0.75    0.27
  -7 -11   3    0.36    0.19
   7 -11  -3    0.52    0.92
  -7 -11   3    0.54    0.34
   7  11  -3   -0.42    0.85
  -7  11   3    0.39    0.41
   7  11  -3   -0.19    0.26
  -6 -11   3    8.44    0.60
   6 -11  -3    5.97    1.49
  -6 -11   3    7.09    0.72
  -6 -11   3    8.00    0.59
   6 -11  -3    9.79    0.72
   6  11  -3    3.59    1.20
  -6  11   3    7.83    0.92
  -5 -11   3    0.49    0.13
   5 -11  -3    0.24    0.18
  -5 -11   3    0.28    0.15
   5 -11  -3    0.81    0.84
  -5 -11   3   -0.06    0.23
   5  11  -3    0.64    0.68
  -5  11   3    0.55    0.33
  -4 -11   3   10.23    0.76
   4 -11  -3    9.44    0.69
  -4 -11   3    8.40    0.62
  -4 -11   3    8.91    0.61
   4 -11  -3    6.42    1.26
  -4  11   3    8.20    0.79
  -4  11   3   10.71    0.56
   4  11  -3    5.51    1.14
  -3 -11   3    1.20    0.16
   3 -11  -3    1.02    0.18
   3 -11  -3    0.57    0.56
  -3  11   3    1.43    0.13
  -3  11   3    1.00    0.29
   3  11  -3    1.42    0.51
  -2 -11   3   32.00    1.93
  -2 -11   3   32.05    1.98
   2 -11  -3   33.40    2.00
  -2  11   3   32.52    2.14
   2  11  -3   29.96    2.14
  -2  11   3   34.33    1.90
  -1 -11   3    2.44    0.19
   1 -11  -3    2.29    0.20
  -1 -11   3    2.33    0.21
   1 -11  -3    1.41    0.47
  -1  11   3    2.23    0.27
  -1  11   3    2.89    0.19
   1  11  -3    2.02    0.27
   1  11  -3    2.19    0.27
   0 -11  -3  135.77    8.05
   0 -11   3  142.07    8.05
   0  11   3  132.07    8.30
   0  11  -3  129.02    8.31
   0  11   3  128.07    7.72
   0  11  -3  135.58   10.26
  -1 -11  -3   13.33    0.89
   1 -11   3   15.41    0.85
   1  11   3   13.98    0.87
  -1  11  -3   13.63    0.96
   1  11   3   14.59    0.94
  -1  11  -3   14.28    1.20
   2 -11   3    0.27    0.15
   2 -11   3    0.45    0.07
  -2 -11  -3    0.39    0.09
   2  11   3    0.30    0.10
   2  11   3    0.25    0.11
  -2  11  -3    0.33    0.15
  -2  11  -3    0.30    0.27
   3 -11   3   14.30    1.02
  -3 -11  -3   15.03    0.93
  -3 -11  -3   14.46    1.28
  -3  11  -3   12.80    1.35
   3  11   3   14.24    0.98
   3  11   3   13.98    0.89
  -3  11  -3   13.94    1.02
   4 -11   3   16.33    1.15
  -4 -11  -3   15.45    1.47
  -4 -11  -3   16.93    1.05
  -4  11  -3   15.50    1.17
   4  11   3   16.83    1.00
  -4  11  -3   16.07    1.54
   4  11   3   13.66    1.12
  -5 -11  -3    1.56    0.52
   5 -11   3    1.94    0.37
  -5 -11  -3    1.50    0.23
   5  11   3    1.53    0.21
  -5  11  -3    2.03    0.59
  -5  11  -3    1.45    0.36
  -6 -11  -3    2.29    0.65
   6 -11   3    2.39    0.45
  -6 -11  -3    2.31    0.31
  -6  11  -3    1.94    0.46
  -6  11  -3    1.99    0.72
   6  11   3    2.16    0.26
  -7 -11  -3    0.18    0.47
   7 -11   3   -0.16    0.29
  -7  11  -3   -0.32    0.33
  -7  11  -3    0.00    0.50
   7  11   3    0.12    0.14
   8 -11   3    0.32    0.35
  -8 -11  -3   -0.51    0.52
  -8  11  -3   -0.02    0.61
  -8  11  -3   -0.98    0.33
   8  11   3    0.15    0.37
   9 -11   3    1.50    0.48
  -9 -11  -3    0.25    0.63
   9  11   3    0.46    0.46
  -9  11  -3    0.97    0.51
  -9  11  -3    1.15    0.83
   9 -12  -3    1.98    1.21
  -9 -12   3   -0.21    0.39
  -9  12   3    1.44    0.58
   9  12  -3    0.77    0.96
   8 -12  -3    0.81    1.06
  -8 -12   3   -0.06    0.34
   8  12  -3   -0.36    0.87
  -8  12   3   -0.10    0.41
  -7 -12   3    1.94    0.28
  -7 -12   3    2.17    0.44
   7 -12  -3    1.70    0.34
   7 -12  -3   -0.28    0.83
   7  12  -3    0.60    0.90
  -7  12   3    3.14    0.63
   7  12  -3    2.13    0.41
  -6 -12   3    0.12    0.28
   6 -12  -3    0.54    0.22
  -6 -12   3    0.14    0.13
  -6 -12   3    0.05    0.16
   6 -12  -3    1.24    0.92
   6  12  -3   -0.61    0.71
  -6  12   3    1.11    0.42
  -5 -12   3    0.64    0.27
   5 -12  -3    0.38    0.20
   5 -12  -3    0.79    0.87
  -5 -12   3    0.93    0.18
  -5 -12   3    0.68    0.15
   5  12  -3    0.86    0.70
  -5  12   3    0.27    0.32
   4 -12  -3    0.36    0.64
  -4 -12   3    0.29    0.13
   4 -12  -3    0.41    0.17
  -4 -12   3    0.46    0.23
  -4 -12   3    0.36    0.11
  -4  12   3    0.61    0.07
   4  12  -3   -0.13    0.47
  -4  12   3    0.60    0.28
   3 -12  -3    3.47    0.32
   3 -12  -3    1.55    0.66
  -3 -12   3    2.89    0.29
  -3 -12   3    2.71    0.24
   3  12  -3    1.97    0.57
  -3  12   3    3.01    0.42
  -3  12   3    3.62    0.22
   3  12  -3    2.13    0.40
   2 -12  -3    0.01    0.08
  -2 -12   3    0.01    0.08
   2 -12  -3    0.20    0.45
  -2 -12   3    0.01    0.06
  -2  12   3    0.11    0.17
   2  12  -3    0.01    0.18
  -2  12   3    0.04    0.05
   2  12  -3    0.21    0.29
  -1 -12   3   39.92    2.34
   1 -12  -3   39.34    2.34
  -1 -12   3   36.88    2.26
   1  12  -3   38.94    2.98
  -1  12   3   38.05    2.47
   1  12  -3   37.27    2.46
   0 -12   3   15.98    0.96
   0 -12  -3   15.14    0.96
   0  12   3   16.15    0.92
   0  12  -3   14.70    1.22
   0  12   3   15.06    1.01
   0  12  -3   14.34    1.03
  -1 -12  -3    1.17    0.14
   1 -12   3    1.55    0.13
   1 -12   3    1.41    0.18
   1  12   3    1.52    0.16
  -1  12  -3    1.14    0.20
  -1  12  -3    1.49    0.29
   1  12   3    1.20    0.18
   2 -12   3   23.71    1.47
  -2 -12  -3   22.61    1.41
   2 -12   3   22.12    1.32
  -2  12  -3   22.36    1.90
   2  12   3   23.18    1.44
  -2  12  -3   22.69    1.49
   2  12   3   21.14    1.35
   3 -12   3   -0.05    0.16
  -3 -12  -3   -0.11    0.22
  -3 -12  -3    0.08    0.09
  -3  12  -3   -0.01    0.28
   3  12   3    0.06    0.09
  -3  12  -3   -0.14    0.15
   3  12   3   -0.04    0.13
  -4 -12  -3    2.47    0.26
  -4 -12  -3    2.62    0.51
   4 -12   3    2.28    0.36
   4  12   3    2.13    0.24
  -4  12  -3    2.76    0.39
  -4  12  -3    1.73    0.51
   4  12   3    1.70    0.31
  -5 -12  -3    1.14    0.44
   5 -12   3    0.13    0.24
  -5 -12  -3    0.28    0.15
  -5  12  -3    0.17    0.26
   5  12   3    0.25    0.13
  -5  12  -3    0.74    0.45
   6 -12   3    1.78    0.39
  -6 -12  -3    0.93    0.58
  -6 -12  -3    1.35    0.26
  -6  12  -3    1.25    0.60
   6  12   3    1.34    0.21
  -6  12  -3    2.07    0.44
   7 -12   3    1.36    0.39
  -7 -12  -3    0.89    0.24
  -7 -12  -3    1.56    0.64
  -7  12  -3    0.64    0.61
   7  12   3    2.16    0.25
  -7  12  -3    0.24    0.36
   8 -12   3    0.07    0.32
  -8 -12  -3    0.19    0.56
   8  12   3   -0.07    0.35
  -8  12  -3   -0.08    0.40
  -8  12  -3    0.59    0.66
  -9 -12  -3    0.63    0.65
   9 -12   3    1.08    0.44
  -9  12  -3    0.66    0.83
  -9  12  -3    0.21    0.48
   9  12   3    0.37    0.45
   9 -13  -3    1.33    1.12
  -9 -13   3   -0.30    0.42
   9  13  -3    1.18    1.03
  -9  13   3   -0.17    0.48
   8 -13  -3    1.03    1.08
  -8 -13   3   -0.17    0.35
  -8  13   3    0.25    0.45
   8  13  -3    1.07    0.96
   7 -13  -3    0.30    0.24
  -7 -13   3    0.17    0.28
   7 -13  -3   -1.62    0.80
  -7 -13   3   -0.18    0.17
   7  13  -3    0.41    0.85
  -7  13   3   -0.05    0.36
  -6 -13   3    0.88    0.35
  -6 -13   3    0.88    0.18
  -6 -13   3    0.97    0.21
   6 -13  -3    0.78    0.25
   6 -13  -3    1.00    0.88
  -6  13   3    0.25    0.35
   6  13  -3    0.43    0.81
  -5 -13   3    3.43    0.31
   5 -13  -3    1.98    0.99
  -5 -13   3    3.38    0.45
   5 -13  -3    3.07    0.36
  -5 -13   3    2.70    0.30
   5  13  -3    2.85    0.89
  -5  13   3    2.85    0.52
   4 -13  -3    3.64    0.96
  -4 -13   3    3.40    0.31
   4 -13  -3    3.61    0.37
  -4 -13   3    4.39    0.36
   4  13  -3    2.48    0.75
  -4  13   3    4.10    0.53
  -3 -13   3   13.60    0.85
   3 -13  -3   10.83    1.45
  -3 -13   3   13.57    0.85
   3 -13  -3   13.38    0.88
  -3  13   3   14.02    0.80
  -3  13   3   12.95    1.02
   3  13  -3   12.55    1.04
  -2 -13   3    0.02    0.09
   2 -13  -3    0.54    0.47
  -2 -13   3   -0.05    0.05
   2 -13  -3    0.01    0.08
   2  13  -3    0.20    0.28
  -2  13   3    0.08    0.05
   2  13  -3    0.04    0.19
  -2  13   3    0.16    0.19
   1 -13  -3   12.56    0.81
  -1 -13   3   11.91    0.80
  -1 -13   3   12.88    0.81
  -1  13   3   12.91    0.90
   1  13  -3   13.80    1.02
   1  13  -3   12.29    0.89
   0 -13  -3   21.82    1.40
   0 -13   3   22.73    1.40
   0  13  -3   22.04    1.78
   0  13   3   25.77    1.35
   0  13   3   22.83    1.47
   0  13  -3   20.21    1.48
   1 -13   3    6.63    0.42
  -1 -13  -3    6.68    0.45
   1 -13   3    7.85    0.50
  -1 -13  -3    6.61    0.58
   1  13   3    6.38    0.48
  -1  13  -3    5.92    0.65
  -1  13  -3    5.84    0.52
   1  13   3    5.91    0.44
  -2 -13  -3    7.23    0.49
   2 -13   3    6.85    0.44
   2 -13   3    7.21    0.57
  -2  13  -3    6.93    0.56
   2  13   3    7.28    0.49
   2  13   3    7.29    0.51
  -2  13  -3    6.38    0.76
   3 -13   3   -0.14    0.15
  -3 -13  -3   -0.01    0.09
  -3  13  -3    0.13    0.18
   3  13   3    0.09    0.10
  -3  13  -3   -0.31    0.29
   3  13   3    0.04    0.12
   4 -13   3    1.05    0.26
  -4 -13  -3    1.18    0.19
  -4 -13  -3    1.51    0.42
   4  13   3    1.61    0.27
  -4  13  -3    0.86    0.44
   4  13   3    1.23    0.19
  -4  13  -3    1.06    0.29
   5 -13   3    1.10    0.33
  -5 -13  -3    0.91    0.46
  -5 -13  -3    1.08    0.21
   5  13   3    0.91    0.31
   5  13   3    0.88    0.18
  -5  13  -3    0.69    0.31
  -5  13  -3    0.46    0.46
  -6 -13  -3    0.10    0.44
   6 -13   3    0.82    0.33
  -6 -13  -3    0.23    0.18
  -6  13  -3    0.80    0.56
   6  13   3    0.51    0.16
  -6  13  -3    0.36    0.32
  -7 -13  -3    0.37    0.51
  -7 -13  -3    0.29    0.19
   7 -13   3    0.49    0.32
   7  13   3    0.12    0.14
  -7  13  -3    0.21    0.38
  -7  13  -3   -0.46    0.49
   8 -13   3    0.12    0.33
  -8 -13  -3    0.83    0.63
   8  13   3    0.29    0.38
  -8  13  -3    0.27    0.66
  -8  13  -3    0.24    0.42
   9 -13   3    0.81    0.40
  -9 -13  -3    0.49    0.62
  -9  13  -3   -0.26    0.67
   9  13   3    1.16    0.50
  -9  13  -3    0.30    0.48
   9 -14  -3    1.26    1.20
  -9  14   3   -0.16    0.50
   8 -14  -3    0.34    1.06
  -8 -14   3    1.59    0.44
  -8 -14   3    1.65    0.30
   8  14  -3    1.77    1.00
  -8  14   3    2.20    0.63
   7 -14  -3    0.65    0.89
  -7 -14   3   -0.23    0.26
   7 -14  -3   -0.09    0.22
  -7 -14   3   -0.12    0.18
  -7 -14   3    0.38    0.18
  -7  14   3    0.11    0.38
   7  14  -3    0.40    0.78
  -6 -14   3    0.57    0.16
  -6 -14   3    0.51    0.18
  -6 -14   3    0.31    0.28
   6 -14  -3    0.27    0.21
   6 -14  -3    1.26    0.90
   6  14  -3    0.56    0.80
  -6  14   3    0.78    0.40
   5 -14  -3    0.17    0.76
  -5 -14   3    0.24    0.12
  -5 -14   3   -0.03    0.13
   5 -14  -3    0.07    0.17
   5  14  -3    0.51    0.63
  -5  14   3    0.18    0.30
   4 -14  -3   21.70    1.31
  -4 -14   3   20.19    1.23
   4 -14  -3   18.21    2.09
  -4 -14   3   20.29    1.25
   4  14  -3   18.75    1.47
   4  14  -3   14.95    1.89
  -4  14   3   21.10    1.48
   3 -14  -3    2.24    0.76
   3 -14  -3    3.90    0.34
  -3 -14   3    3.73    0.29
  -3 -14   3    3.54    0.33
   3  14  -3    3.31    0.47
  -3  14   3    4.40    0.51
  -3  14   3    4.25    0.26
   3  14  -3    3.77    0.69
  -2 -14   3   62.20    3.92
   2 -14  -3   64.96    3.94
  -2 -14   3   63.48    3.79
   2  14  -3   64.97    4.13
  -2  14   3   69.03    4.16
  -2  14   3   65.58    3.76
  -1 -14   3    4.28    0.34
   1 -14  -3    4.50    0.34
  -1 -14   3    4.52    0.33
   1  14  -3    4.27    0.40
  -1  14   3    4.67    0.42
  -1  14   3    5.71    0.33
   1  14  -3    4.12    0.42
   0 -14  -3    1.77    0.32
   0 -14  -3    1.87    0.19
   0 -14   3    2.06    0.20
   0 -14   3    1.74    0.19
   0  14   3    2.24    0.20
   0  14   3    1.92    0.24
   0  14  -3    2.11    0.27
   0  14  -3    1.51    0.25
   1 -14   3   26.83    1.54
  -1 -14  -3   25.45    1.61
  -1 -14  -3   26.47    2.06
   1  14   3   25.26    1.55
   1  14   3   26.19    1.68
  -1  14  -3   25.87    2.11
  -1  14  -3   25.93    1.71
  -2 -14  -3   44.45    3.51
   2 -14   3   43.48    2.59
  -2 -14  -3   44.21    2.73
   2 -14   3   46.60    2.79
   2  14   3   44.58    2.64
  -2  14  -3   45.86    2.87
  -2  14  -3   41.74    3.58
   2  14   3   46.32    2.82
   3 -14   3    5.31    0.50
  -3 -14  -3    4.86    0.40
   3  14   3    5.36    0.40
  -3  14  -3    4.98    0.51
  -3  14  -3    5.57    0.75
   3  14   3    5.55    0.43
  -4 -14  -3    0.65    0.36
   4 -14   3    0.53    0.23
  -4 -14  -3    0.45    0.14
   4  14   3    0.26    0.13
   4  14   3    0.75    0.22
  -4  14  -3    0.28    0.37
  -4  14  -3    0.47    0.24
   5 -14   3    1.64    0.35
  -5 -14  -3    1.40    0.24
  -5 -14  -3    1.46    0.49
  -5  14  -3    2.11    0.61
   5  14   3    1.55    0.22
  -5  14  -3    1.10    0.36
   5  14   3    1.31    0.33
  -6 -14  -3    3.49    0.38
  -6 -14  -3    3.09    0.70
   6 -14   3    3.58    0.51
  -6  14  -3    3.69    0.58
   6  14   3    2.69    0.48
   6  14   3    2.81    0.32
  -6  14  -3    2.91    0.81
  -7 -14  -3    0.51    0.55
   7 -14   3    0.54    0.33
  -7 -14  -3    0.32    0.20
   7  14   3    0.21    0.16
  -7  14  -3    0.87    0.65
  -7  14  -3    0.32    0.38
   8 -14   3    0.60    0.35
  -8 -14  -3   -0.03    0.59
  -8  14  -3   -0.13    0.58
   8  14   3    0.88    0.43
  -8  14  -3    0.12    0.40
   9 -14   3    0.39    0.38
  -9 -14  -3    0.52    0.66
   9  14   3    0.69    0.45
  -9  14  -3    0.21    0.66
  -9  14  -3   -0.49    0.41
   9 -15  -3    2.18    1.32
  -9  15   3    0.73    0.56
   8 -15  -3    0.27    0.97
  -8 -15   3    0.24    0.22
   8  15  -3    1.46    0.95
  -8  15   3    0.21    0.45
  -7 -15   3    0.36    0.18
  -7 -15   3   -0.06    0.18
   7 -15  -3    0.55    0.89
   7 -15  -3   -0.10    0.21
   7  15  -3    0.87    0.87
  -7  15   3    0.39    0.43
  -6 -15   3    4.31    0.39
  -6 -15   3    3.58    0.35
   6 -15  -3    1.07    0.97
   6 -15  -3    3.88    0.43
  -6  15   3    2.30    0.53
   6  15  -3    0.68    0.81
  -5 -15   3    1.18    0.21
   5 -15  -3    0.97    0.23
  -5 -15   3    0.99    0.17
   5 -15  -3    0.21    0.71
   5  15  -3    1.01    0.41
   5  15  -3    0.73    0.68
  -5  15   3    1.56    0.40
  -4 -15   3    3.15    0.29
   4 -15  -3    3.96    0.98
  -4 -15   3    3.88    0.34
   4 -15  -3    3.33    0.34
  -4  15   3    3.01    0.48
   4  15  -3    3.05    0.77
   4  15  -3    2.52    0.47
  -3 -15   3   -0.07    0.06
  -3 -15   3   -0.07    0.10
   3 -15  -3   -0.02    0.10
   3 -15  -3    0.12    0.48
   3  15  -3   -0.12    0.20
  -3  15   3   -0.10    0.19
  -3  15   3   -0.05    0.05
   3  15  -3   -0.19    0.39
   2 -15  -3   17.05    1.00
  -2 -15   3   15.86    0.97
   2 -15  -3   11.51    1.50
  -2 -15   3   15.84    0.97
   2  15  -3   15.33    1.10
[truncated: 1,440,694 more chars]
